# Supplementary material for: Mucosal transcriptomics highlight lncRNAs implicated in ulcerative colitis, Crohn’s disease, and celiac disease
Source: JCI Insight. 2023 Jul 24;8(14):e170181. doi: 10.1172/jci.insight.170181 (PMC10443795; doi:10.1172/jci.insight.170181)
Supplement: Supplemental data set 4 [file jciinsight-8-170181-s243.xlsx]

## Sheet: Protect_lncRNA_PUCAI_DE
baseMean	log2FoldChange	lfcSE	stat	pvalue	padj	Gene	PUCAI severe_vs_mild
34.9002	-2.27036	0.240595	9.43646	3.85581e-21	9.32334e-18	RP11-396O20.2	lower in PUCAIsevere
40.435	-2.18506	0.344268	6.34698	2.19585e-10	1.0018e-08	RP13-497K6.1	lower in PUCAIsevere
22.1605	-2.01438	0.330507	6.09483	1.09555e-09	3.9538e-08	DPP10-AS1	lower in PUCAIsevere
103.093	-1.9099	0.783748	2.43688	0.0148147	0.0447328	RP11-334J6.7	lower in PUCAIsevere
453.035	-1.90812	0.267602	7.13046	1.00031e-12	1.18354e-10	B3GALT5-AS1	lower in PUCAIsevere
375.754	-1.90747	0.278658	6.84522	7.63597e-12	5.95605e-10	CDKN2B-AS1	lower in PUCAIsevere
15.7242	-1.76103	0.247786	7.10706	1.18545e-12	1.24627e-10	RP11-380P13.1	lower in PUCAIsevere
13.6315	-1.70805	0.284185	6.01034	1.85134e-09	5.96871e-08	RP11-292E2.2	lower in PUCAIsevere
123.965	-1.58574	0.35787	4.43104	9.37814e-06	9.25565e-05	RP11-63M22.2	lower in PUCAIsevere
197.19	-1.43174	0.292107	4.90145	9.5134e-07	1.34523e-05	CERS6-AS1	lower in PUCAIsevere
29.0093	-1.30106	0.3284	3.96182	7.43805e-05	0.000541723	RP11-316M1.12	lower in PUCAIsevere
24.143	-1.28682	0.206529	6.23073	4.64269e-10	1.90272e-08	AP000344.3	lower in PUCAIsevere
28.8589	-1.2864	0.440899	2.91766	0.00352665	0.0138657	CTB-31O20.3	lower in PUCAIsevere
81.6916	-1.28468	0.191184	6.71961	1.82206e-11	1.19074e-09	RP11-405A12.2	lower in PUCAIsevere
33.9677	-1.27955	0.406615	3.14683	0.00165051	0.00736333	AC007192.6	lower in PUCAIsevere
64.9205	-1.21896	0.417079	2.92262	0.00347098	0.0137813	RP11-589M4.1	lower in PUCAIsevere
19.835	-1.09934	0.321575	3.41862	0.000629405	0.00331569	RP11-110I1.6	lower in PUCAIsevere
9.36423	-1.07335	0.261977	4.09713	4.18313e-05	0.000341716	RP11-627K11.6	lower in PUCAIsevere
15.7995	-1.07012	0.19855	5.38968	7.05848e-08	1.39897e-06	RP11-542M13.2	lower in PUCAIsevere
42.8216	-1.04736	0.195183	5.36601	8.04953e-08	1.5766e-06	CTC-441N14.2	lower in PUCAIsevere
45.2734	-1.03442	0.118101	8.75879	1.97358e-18	9.54423e-16	RP11-33O4.1	lower in PUCAIsevere
2.60175	-1.02522	0.366583	2.79669	0.0051629	0.0191471	CTC-518B2.12	lower in PUCAIsevere
512.29	-1.02506	0.155381	6.59709	4.19306e-11	2.32159e-09	SATB2-AS1	lower in PUCAIsevere
43.8692	-1.02032	0.1503	6.78854	1.13275e-11	8.05583e-10	RP11-486O13.2	lower in PUCAIsevere
78.8586	-0.991671	0.173056	5.73035	1.00221e-08	2.65657e-07	DRAIC	lower in PUCAIsevere
9.99108	-0.991552	0.197131	5.02992	4.9068e-07	7.46204e-06	RP11-124B13.1	lower in PUCAIsevere
28.7464	-0.959574	0.142487	6.73449	1.64508e-11	1.13651e-09	CA3-AS1	lower in PUCAIsevere
92.2187	-0.954875	0.132575	7.20253	5.91049e-13	7.93976e-11	GATA6-AS1	lower in PUCAIsevere
43.2823	-0.954866	0.248108	3.84859	0.000118802	0.000808994	CTD-2566J3.1	lower in PUCAIsevere
378.974	-0.943768	0.145418	6.49002	8.58272e-11	4.41554e-09	AC114730.3	lower in PUCAIsevere
13.7096	-0.933637	0.185029	5.0459	4.51401e-07	6.95216e-06	RP11-77K12.10	lower in PUCAIsevere
38.4689	-0.900877	0.162877	5.53103	3.18355e-08	6.81223e-07	RP11-747D18.1	lower in PUCAIsevere
19.5567	-0.89504	0.162011	5.52457	3.30287e-08	7.00556e-07	RP11-297D21.2	lower in PUCAIsevere
57.6324	-0.878696	0.305341	2.87775	0.00400518	0.0153235	AF127577.10	lower in PUCAIsevere
42.6706	-0.872989	0.176512	4.94579	7.58355e-07	1.09803e-05	RP11-321G12.1	lower in PUCAIsevere
9.11103	-0.850832	0.177694	4.78817	1.68306e-06	2.18797e-05	RP11-61A14.1	lower in PUCAIsevere
229.26	-0.838385	0.156451	5.35875	8.37988e-08	1.60814e-06	AC009014.3	lower in PUCAIsevere
48.8464	-0.838051	0.156211	5.36487	8.10075e-08	1.5766e-06	AC114730.5	lower in PUCAIsevere
4.65742	-0.811082	0.186837	4.34111	1.41764e-05	0.000132863	RP11-514F3.5	lower in PUCAIsevere
109.559	-0.809635	0.135812	5.96144	2.50028e-09	7.65277e-08	VIPR1-AS1	lower in PUCAIsevere
10.1041	-0.792563	0.171494	4.62151	3.80957e-06	4.34506e-05	MNX1-AS2	lower in PUCAIsevere
9.05782	-0.782649	0.191753	4.08154	4.4738e-05	0.00035939	AC011523.2	lower in PUCAIsevere
32.9118	-0.781948	0.189019	4.13687	3.52082e-05	0.000294579	PP14571	lower in PUCAIsevere
309.996	-0.770052	0.12725	6.05151	1.43495e-09	5.02857e-08	AC005944.2	lower in PUCAIsevere
25.932	-0.766735	0.277769	2.76033	0.00577431	0.0208392	AC002398.12	lower in PUCAIsevere
14.6881	-0.761704	0.13543	5.62436	1.86201e-08	4.32917e-07	CTC-297N7.9	lower in PUCAIsevere
53.4548	-0.753047	0.12305	6.11987	9.36515e-10	3.48384e-08	RP11-89H19.2	lower in PUCAIsevere
27.5237	-0.748695	0.140801	5.31739	1.05267e-07	1.95798e-06	LINC00923	lower in PUCAIsevere
3.16947	-0.742048	0.215063	3.45037	0.000559814	0.00299476	RP11-884K10.6	lower in PUCAIsevere
12.5898	-0.741479	0.201625	3.67752	0.000235513	0.00143443	LINC00238	lower in PUCAIsevere
272.588	-0.741099	0.143301	5.17162	2.32068e-07	3.79149e-06	DIO3OS	lower in PUCAIsevere
14.7392	-0.734816	0.174192	4.21844	2.46003e-05	0.00021397	RP11-356O9.2	lower in PUCAIsevere
5.33657	-0.730689	0.155556	4.69728	2.63644e-06	3.18745e-05	LINC00345	lower in PUCAIsevere
23.3244	-0.727193	0.128241	5.6705	1.42379e-08	3.54921e-07	RP11-367G18.1	lower in PUCAIsevere
174.961	-0.717931	0.190149	3.77562	0.000159608	0.00103467	RP11-513I15.6	lower in PUCAIsevere
49.2262	-0.707903	0.0994272	7.11981	1.08074e-12	1.18784e-10	RP1-170O19.14	lower in PUCAIsevere
141.692	-0.697173	0.103739	6.72045	1.81159e-11	1.19074e-09	RP11-216L13.19	lower in PUCAIsevere
5.96171	-0.696738	0.249244	2.7954	0.00518352	0.0191941	NOVA1-AS1	lower in PUCAIsevere
22.8236	-0.6952	0.273809	2.539	0.011117	0.0356825	RP11-538I12.2	lower in PUCAIsevere
8.88874	-0.694879	0.143361	4.84707	1.25298e-06	1.70208e-05	RP11-595B24.2	lower in PUCAIsevere
718.513	-0.691811	0.132391	5.22551	1.73673e-07	2.97831e-06	RP1-193H18.2	lower in PUCAIsevere
8.32498	-0.686125	0.28157	2.43679	0.0148184	0.0447328	RP11-64K12.4	lower in PUCAIsevere
474.606	-0.681702	0.105537	6.45934	1.05158e-10	5.08544e-09	HOXA11-AS	lower in PUCAIsevere
109.561	-0.680663	0.187508	3.63006	0.00028336	0.00167522	CH17-360D5.1	lower in PUCAIsevere
47.6547	-0.674018	0.0986024	6.83572	8.1596e-12	6.1656e-10	TMEM220-AS1	lower in PUCAIsevere
41.5179	-0.672431	0.118734	5.66333	1.48462e-08	3.66307e-07	RP3-406A7.7	lower in PUCAIsevere
13.266	-0.668795	0.158525	4.21886	2.45539e-05	0.00021397	RP11-283G6.4	lower in PUCAIsevere
50.2867	-0.665575	0.134411	4.95179	7.35342e-07	1.07112e-05	RP11-69I8.2	lower in PUCAIsevere
53.0888	-0.663077	0.139047	4.76871	1.85412e-06	2.3721e-05	LINC00992	lower in PUCAIsevere
115.205	-0.66044	0.104862	6.29818	3.01167e-10	1.3004e-08	DDR1-AS1	lower in PUCAIsevere
84.1269	-0.654337	0.0987193	6.62825	3.39679e-11	1.95558e-09	AC034220.3	lower in PUCAIsevere
104.921	-0.654163	0.117589	5.56314	2.64959e-08	5.84626e-07	RP5-965G21.4	lower in PUCAIsevere
13.0347	-0.649234	0.115089	5.64116	1.6891e-08	4.04382e-07	RP11-74E22.3	lower in PUCAIsevere
16.2715	-0.637613	0.0966669	6.59598	4.22457e-11	2.32159e-09	RP11-118B18.2	lower in PUCAIsevere
50.1925	-0.63624	0.130248	4.88484	1.03511e-06	1.43844e-05	RP13-616I3.1	lower in PUCAIsevere
133.88	-0.635677	0.113829	5.58448	2.34406e-08	5.29714e-07	XXbac-B476C20.9	lower in PUCAIsevere
5.75838	-0.633794	0.158635	3.99529	6.4616e-05	0.000485222	RP11-168F9.2	lower in PUCAIsevere
21.0432	-0.626405	0.157126	3.98664	6.70155e-05	0.000495546	RP11-881L2.1	lower in PUCAIsevere
62.0076	-0.625625	0.0854669	7.32008	2.47815e-13	3.99478e-11	ZIM2-AS1	lower in PUCAIsevere
94.4895	-0.625001	0.124357	5.02585	5.01214e-07	7.57459e-06	LA16c-380H5.5	lower in PUCAIsevere
159.984	-0.624466	0.127772	4.88735	1.022e-06	1.42844e-05	HOXB-AS4	lower in PUCAIsevere
126.32	-0.621299	0.114674	5.41795	6.02855e-08	1.20471e-06	AP000439.3	lower in PUCAIsevere
701.849	-0.618869	0.0976947	6.33472	2.3777e-10	1.06468e-08	RP11-357H14.17	lower in PUCAIsevere
165.57	-0.618174	0.110279	5.60553	2.07614e-08	4.73595e-07	LINC01224	lower in PUCAIsevere
10.0267	-0.617928	0.151309	4.08389	4.42877e-05	0.000356959	RP11-1060J15.9	lower in PUCAIsevere
22.8244	-0.617164	0.155271	3.97476	7.04517e-05	0.000519367	FAM3D-AS1	lower in PUCAIsevere
13.6492	-0.616137	0.133989	4.59841	4.25734e-06	4.76585e-05	RP11-223I10.1	lower in PUCAIsevere
87.3632	-0.614584	0.130481	4.71015	2.47537e-06	3.08528e-05	CYP4F35P	lower in PUCAIsevere
16.4349	-0.61048	0.15801	3.86355	0.000111752	0.000772047	RP11-297L17.2	lower in PUCAIsevere
2324.87	-0.600076	0.187389	3.2023	0.00136333	0.0062825	RP11-386G11.10	lower in PUCAIsevere
17.0274	-0.599123	0.216051	2.77307	0.00555304	0.0203136	LINC01612	lower in PUCAIsevere
16.8243	-0.596333	0.148139	4.02549	5.68573e-05	0.000437699	ERVH-1	lower in PUCAIsevere
59.7172	-0.596269	0.0981679	6.07397	1.24785e-09	4.43722e-08	RP11-160O5.1	lower in PUCAIsevere
374.926	-0.594034	0.119852	4.95638	7.18203e-07	1.05891e-05	LINC01123	lower in PUCAIsevere
286.275	-0.590634	0.145459	4.06048	4.8972e-05	0.000385714	RP11-627G23.1	lower in PUCAIsevere
9.5405	-0.588678	0.137004	4.2968	1.73278e-05	0.00015912	RP11-467J12.4	lower in PUCAIsevere
613.911	-0.587458	0.0924149	6.35675	2.06073e-10	9.58241e-09	RP11-96D1.11	lower in PUCAIsevere
125.588	0.585658	0.0802535	-7.2976	2.92947e-13	4.42716e-11	AGAP2-AS1	higher in PUCAI severe
122.375	0.589074	0.0978557	-6.01983	1.74603e-09	5.70528e-08	LINC01410	higher in PUCAI severe
30.9909	0.590967	0.138069	-4.28023	1.86697e-05	0.00016782	LINC00582	higher in PUCAI severe
1678.35	0.592037	0.125736	-4.70857	2.49459e-06	3.09329e-05	MIAT	higher in PUCAI severe
54.9054	0.595586	0.104523	-5.69811	1.21143e-08	3.14972e-07	RASSF8-AS1	higher in PUCAI severe
133.273	0.596145	0.114297	-5.21573	1.83096e-07	3.09599e-06	PCAT19	higher in PUCAI severe
260.457	0.61856	0.109625	-5.64253	1.67569e-08	4.04382e-07	RP11-16E12.2	higher in PUCAI severe
7.14174	0.621731	0.156473	-3.9734	7.08528e-05	0.000520735	AF064858.10	higher in PUCAI severe
37.2862	0.623841	0.147649	-4.22517	2.38765e-05	0.000209939	AC002511.3	higher in PUCAI severe
13.1272	0.626586	0.121563	-5.1544	2.54448e-07	4.12923e-06	RP11-286O1.1	higher in PUCAI severe
31.7664	0.630772	0.136616	-4.6171	3.89145e-06	4.41762e-05	RP11-54A4.2	higher in PUCAI severe
41.3647	0.630999	0.130854	-4.82215	1.42021e-06	1.90781e-05	RP11-19N8.4	higher in PUCAI severe
2.88562	0.633462	0.194405	-3.25846	0.00112019	0.00536363	RP13-152O15.5	higher in PUCAI severe
366.087	0.637681	0.142783	-4.46609	7.9661e-06	8.20007e-05	LINC00152	higher in PUCAI severe
93.3816	0.646735	0.168565	-3.83671	0.000124691	0.000839843	RP11-1228E12.1	higher in PUCAI severe
4.18344	0.648431	0.191737	-3.38188	0.000719908	0.00374352	RP13-1016M1.2	higher in PUCAI severe
43.5148	0.652623	0.149731	-4.35864	1.3087e-05	0.000124096	GATA2-AS1	higher in PUCAI severe
3.46513	0.659195	0.198514	-3.32065	0.00089807	0.00447472	CTA-384D8.31	higher in PUCAI severe
56.0387	0.663262	0.125608	-5.28043	1.28883e-07	2.30844e-06	RP11-1334A24.6	higher in PUCAI severe
92021.6	0.667097	0.264066	-2.52625	0.0115288	0.0366798	CH507-513H4.3	higher in PUCAI severe
92021.6	0.667097	0.264066	-2.52625	0.0115288	0.0366798	CH507-513H4.4	higher in PUCAI severe
92021.6	0.667097	0.264066	-2.52625	0.0115288	0.0366798	CH507-513H4.6	higher in PUCAI severe
6.06612	0.667269	0.168063	-3.97034	7.17706e-05	0.000525883	RP11-439L18.2	higher in PUCAI severe
779.712	0.67078	0.116505	-5.75753	8.53549e-09	2.2932e-07	LINC01002	higher in PUCAI severe
36.516	0.675736	0.104302	-6.47865	9.25482e-11	4.66211e-09	RP11-24F11.2	higher in PUCAI severe
59.851	0.680973	0.102678	-6.63209	3.3096e-11	1.95186e-09	FUT8-AS1	higher in PUCAI severe
12.1701	0.683478	0.178768	-3.82326	0.000131698	0.000872455	RP11-536O18.1	higher in PUCAI severe
10.9103	0.683491	0.263976	-2.58922	0.00961949	0.0317325	AC093627.8	higher in PUCAI severe
28.0502	0.690458	0.222649	-3.10111	0.00192795	0.00841478	RP11-575F12.2	higher in PUCAI severe
11.5476	0.704309	0.14992	-4.69789	2.62861e-06	3.18745e-05	RP11-350N15.4	higher in PUCAI severe
9.54864	0.713682	0.160608	-4.44362	8.84593e-06	8.94956e-05	RP11-275I4.2	higher in PUCAI severe
26.0616	0.718772	0.129218	-5.56249	2.65959e-08	5.84626e-07	CTD-2334D19.1	higher in PUCAI severe
38.5762	0.724019	0.116291	-6.22591	4.78775e-10	1.92946e-08	RP11-689B22.2	higher in PUCAI severe
291.217	0.725792	0.144667	-5.01698	5.24904e-07	7.88334e-06	RP11-334E6.12	higher in PUCAI severe
12.3035	0.727886	0.169228	-4.30123	1.69855e-05	0.00015736	RP11-37L2.1	higher in PUCAI severe
76.9536	0.728984	0.118171	-6.16888	6.87738e-10	2.6396e-08	RP11-750H9.5	higher in PUCAI severe
81.3928	0.735195	0.0980645	-7.49705	6.52694e-14	1.21401e-11	ST3GAL4-AS1	higher in PUCAI severe
315.836	0.737434	0.220065	-3.35098	0.000805253	0.00412886	H19	higher in PUCAI severe
27.69	0.744241	0.141083	-5.27521	1.32602e-07	2.35759e-06	RP11-67C2.2	higher in PUCAI severe
335.412	0.75069	0.124487	-6.03026	1.63695e-09	5.57485e-08	RP6-159A1.4	higher in PUCAI severe
36.2521	0.755058	0.164514	-4.58962	4.44055e-06	4.94804e-05	LINC00520	higher in PUCAI severe
47.5085	0.757382	0.166113	-4.55944	5.12891e-06	5.61164e-05	RP11-1070N10.3	higher in PUCAI severe
62.5792	0.766736	0.1106	-6.93251	4.13426e-12	3.70246e-10	LINC01503	higher in PUCAI severe
48.6512	0.77629	0.116686	-6.65281	2.87546e-11	1.73822e-09	AC006126.4	higher in PUCAI severe
10.376	0.78901	0.177471	-4.44585	8.75453e-06	8.8943e-05	AC115522.3	higher in PUCAI severe
8.59933	0.793572	0.1799	-4.41119	1.02803e-05	9.99832e-05	RP1-134E15.3	higher in PUCAI severe
502.158	0.829708	0.111573	-7.43645	1.03426e-13	1.78631e-11	MIR4435-2HG	higher in PUCAI severe
105.579	0.833166	0.147894	-5.63353	1.76555e-08	4.15074e-07	RP11-79H23.3	higher in PUCAI severe
113.482	0.84293	0.158632	-5.31375	1.07394e-07	1.98228e-06	RP11-462G2.1	higher in PUCAI severe
132.55	0.843516	0.28506	-2.95908	0.0030856	0.0125606	RMRP	higher in PUCAI severe
7.93181	0.846786	0.21373	-3.96194	7.43423e-05	0.000541723	LINC01506	higher in PUCAI severe
17.1647	0.865405	0.192767	-4.48939	7.14272e-06	7.44633e-05	RP11-44K6.4	higher in PUCAI severe
10.3619	0.865443	0.138238	-6.26051	3.83724e-10	1.6278e-08	AC116366.5	higher in PUCAI severe
62.8474	0.865887	0.126325	-6.85442	7.16033e-12	5.77123e-10	RP1-261G23.7	higher in PUCAI severe
51.8387	0.871158	0.111162	-7.83683	4.62069e-15	1.24143e-12	SH3RF3-AS1	higher in PUCAI severe
61.4847	0.878485	0.239625	-3.66609	0.00024629	0.00148141	LINC01235	higher in PUCAI severe
107.531	0.88615	0.155677	-5.69222	1.25398e-08	3.22567e-07	RP11-400K9.4	higher in PUCAI severe
56.9203	0.889734	0.114585	-7.76481	8.17703e-15	1.97721e-12	RP11-20I20.4	higher in PUCAI severe
11.8396	0.89664	0.234054	-3.83092	0.000127666	0.000853872	RP11-357P18.2	higher in PUCAI severe
39.5241	0.90179	0.169048	-5.3345	9.5807e-08	1.79582e-06	RP11-223C24.1	higher in PUCAI severe
5.35005	0.909118	0.185233	-4.90797	9.2025e-07	1.30892e-05	RP6-65G23.5	higher in PUCAI severe
23.8562	0.917443	0.128304	-7.15057	8.64192e-13	1.0998e-10	CTB-31N19.3	higher in PUCAI severe
71.0506	0.917562	0.142586	-6.43516	1.23347e-10	5.8481e-09	RP11-7K24.3	higher in PUCAI severe
12.0849	0.930598	0.369061	-2.52153	0.0116846	0.0369325	WISP1-OT1	higher in PUCAI severe
299.564	0.936792	0.192217	-4.87363	1.09568e-06	1.51391e-05	AC021218.2	higher in PUCAI severe
24.3812	0.946527	0.169615	-5.58044	2.39904e-08	5.37119e-07	RP11-92C4.6	higher in PUCAI severe
15.0704	0.96082	0.171176	-5.61306	1.98779e-08	4.5776e-07	KB-1507C5.4	higher in PUCAI severe
525.889	0.965863	0.289573	-3.33547	0.000851541	0.00427184	CH507-513H4.5	higher in PUCAI severe
56.849	0.968007	0.171228	-5.65333	1.57372e-08	3.8437e-07	LINC01484	higher in PUCAI severe
23.4966	0.994818	0.172315	-5.77327	7.77498e-09	2.11235e-07	RP11-806H10.4	higher in PUCAI severe
16.5519	1.00178	0.161999	-6.18388	6.25468e-10	2.43932e-08	RP11-350J20.12	higher in PUCAI severe
9.75	1.00181	0.177837	-5.63328	1.7681e-08	4.15074e-07	RP11-211G23.2	higher in PUCAI severe
20.348	1.02179	0.153361	-6.66265	2.68941e-11	1.66744e-09	RP11-638I2.9	higher in PUCAI severe
15.0352	1.02472	0.17251	-5.94004	2.84952e-09	8.61266e-08	RP11-1029J19.4	higher in PUCAI severe
95.8102	1.0264	0.155895	-6.58393	4.58167e-11	2.46189e-09	SH3PXD2A-AS1	higher in PUCAI severe
25.4989	1.0684	0.153245	-6.97184	3.12813e-12	2.90916e-10	WNT5A-AS1	higher in PUCAI severe
162.785	1.07339	0.3234	-3.31909	0.000903105	0.004484	RPPH1	higher in PUCAI severe
26.5303	1.08025	0.148835	-7.258	3.92867e-13	5.58796e-11	RP11-347C18.3	higher in PUCAI severe
12.5362	1.08033	0.15258	-7.08038	1.43761e-12	1.43932e-10	LINC01269	higher in PUCAI severe
9.21004	1.08449	0.166173	-6.52631	6.74077e-11	3.5433e-09	RP11-1029J19.5	higher in PUCAI severe
47.6561	1.12799	0.15942	-7.07559	1.48813e-12	1.43932e-10	MIR503HG	higher in PUCAI severe
17.1264	1.20232	0.174411	-6.89357	5.44095e-12	4.53663e-10	RP11-242C19.2	higher in PUCAI severe
47.7599	1.20485	0.169061	-7.12672	1.02789e-12	1.18354e-10	CTD-2555C10.3	higher in PUCAI severe
103.456	1.20522	0.135814	-8.87404	7.05415e-19	4.26424e-16	CCAT1	higher in PUCAI severe
7.55373	1.25561	0.256732	-4.89074	1.00456e-06	1.41223e-05	RP11-44K6.2	higher in PUCAI severe
186.201	1.27095	0.161808	-7.85473	4.00648e-15	1.21096e-12	LINC01272	higher in PUCAI severe
24.1828	1.27329	0.150242	-8.47492	2.3525e-17	9.48059e-15	GK-AS1	higher in PUCAI severe
50.7237	1.33274	0.226517	-5.88361	4.01404e-09	1.16939e-07	FAM157B	higher in PUCAI severe
26.1355	1.40286	0.185302	-7.57066	3.71329e-14	7.48227e-12	RP11-482G13.1	higher in PUCAI severe
9.35856	1.43525	0.21097	-6.80311	1.02387e-11	7.50218e-10	CASC19	higher in PUCAI severe
118.886	1.69513	0.214841	-7.89019	3.01722e-15	1.04223e-12	LUCAT1	higher in PUCAI severe
21.9034	1.72094	0.193487	-8.89434	5.87694e-19	4.26424e-16	RP11-211G3.2	higher in PUCAI severe
18.1336	1.78159	0.234223	-7.60637	2.81893e-14	6.19652e-12	MIR3945HG	higher in PUCAI severe
15.9769	1.88375	0.48587	-3.87706	0.000105724	0.000738848	RP11-290L1.3	higher in PUCAI severe
39.8085	2.09797	0.227801	-9.20968	3.27106e-20	3.95471e-17	CTB-61M7.2	higher in PUCAI severe

## Sheet: Protect_protein_coding_PUCAI_DE
baseMean	log2FoldChange	lfcSE	stat	pvalue	padj	Gene	PUCAI severe_vs_mild
97.3928	-3.73592	0.763936	-4.89035	1.00655e-06	7.03735e-06	DEFB4B	lower in PUCAIsevere
257.559	-3.65183	0.294816	-12.3868	3.08035e-35	2.16656e-31	S100A12	lower in PUCAIsevere
141.804	-3.188	0.252315	-12.635	1.35394e-36	1.90459e-32	MCEMP1	lower in PUCAIsevere
2295.65	-2.82792	0.262331	-10.78	4.2793e-27	1.12445e-23	S100A8	lower in PUCAIsevere
154.327	-2.78099	0.308607	-9.01142	2.03412e-19	5.10962e-17	PRSS2	lower in PUCAIsevere
294.157	-2.64329	0.270333	-9.77792	1.40065e-22	1.09461e-19	PROK2	lower in PUCAIsevere
84.8414	-2.62587	0.335725	-7.82148	5.22042e-15	3.65352e-13	KRT6A	lower in PUCAIsevere
924.495	-2.543	0.293047	-8.67778	4.03567e-18	7.4697e-16	PI15	lower in PUCAIsevere
5465.37	-2.5217	0.267445	-9.42884	4.14648e-21	2.16032e-18	MMP1	lower in PUCAIsevere
61.8313	-2.4471	0.469974	-5.20689	1.92035e-07	1.61758e-06	SPRR2A	lower in PUCAIsevere
89.9787	-2.43242	0.225862	-10.7695	4.79611e-27	1.12445e-23	FCAR	lower in PUCAIsevere
177.21	-2.39758	0.279867	-8.56688	1.06324e-17	1.69961e-15	KRT6B	lower in PUCAIsevere
20.3592	-2.38302	0.317574	-7.50384	6.19757e-14	3.11362e-12	FOLR3	lower in PUCAIsevere
70.9032	-2.37221	0.247944	-9.56751	1.09509e-21	6.41862e-19	PRSS1	lower in PUCAIsevere
157.434	-2.35675	0.313114	-7.52681	5.19959e-14	2.66944e-12	SFRP2	lower in PUCAIsevere
895.908	-2.32031	0.236827	-9.79752	1.15378e-22	9.5472e-20	AQP9	lower in PUCAIsevere
433.441	-2.31652	0.281742	-8.22215	1.9989e-16	2.06754e-14	HCAR3	lower in PUCAIsevere
791.313	-2.31309	0.329152	-7.02742	2.10392e-12	7.3076e-11	DEFB4A	lower in PUCAIsevere
222.177	-2.2965	0.430759	-5.33129	9.75151e-08	8.91322e-07	SPRR1B	lower in PUCAIsevere
3.9193	-2.29568	0.528203	-4.34621	1.3851e-05	7.00113e-05	SPRR1A	lower in PUCAIsevere
222.118	-2.28135	0.393564	-5.79665	6.76536e-09	8.62032e-08	SERPINB4	lower in PUCAIsevere
175.145	-2.13625	0.325902	-6.55489	5.56835e-11	1.25529e-09	NPTX2	lower in PUCAIsevere
364.434	-2.12689	0.195074	-10.903	1.11521e-27	5.22924e-24	MGAM	lower in PUCAIsevere
5821.36	-2.12516	0.23232	-9.14758	5.82213e-20	1.82e-17	S100A9	lower in PUCAIsevere
32.123	-2.10963	0.450868	-4.67905	2.88211e-06	1.77777e-05	SPRR3	lower in PUCAIsevere
56.3786	-2.05666	0.225816	-9.10767	8.41685e-20	2.51914e-17	CLEC4D	lower in PUCAIsevere
518.916	-2.04291	0.208243	-9.81021	1.01753e-22	9.5424e-20	SLC11A1	lower in PUCAIsevere
358.946	-2.00467	0.323327	-6.20012	5.64191e-10	9.60831e-09	CSF3	lower in PUCAIsevere
328.751	-1.99975	0.223119	-8.96269	3.16855e-19	7.55458e-17	FPR2	lower in PUCAIsevere
388.413	-1.99213	0.443247	-4.49441	6.97636e-06	3.85151e-05	SERPINB3	lower in PUCAIsevere
12715.5	-1.96955	0.364469	-5.4039	6.52082e-08	6.35153e-07	REG1A	lower in PUCAIsevere
114.044	-1.95787	0.20389	-9.60258	7.79671e-22	4.98528e-19	NFE2	lower in PUCAIsevere
54.254	-1.95484	0.248406	-7.86956	3.55901e-15	2.64892e-13	CXCL17	lower in PUCAIsevere
540.222	-1.94652	0.238664	-8.15594	3.46488e-16	3.38476e-14	INHBA	lower in PUCAIsevere
2697.99	-1.93886	0.252793	-7.66974	1.7235e-14	1.04502e-12	CXCL8	lower in PUCAIsevere
474.03	-1.93075	0.389232	-4.96041	7.03453e-07	5.09026e-06	KLK10	lower in PUCAIsevere
260.545	-1.92365	0.207134	-9.287	1.58702e-20	6.20128e-18	KCNJ15	lower in PUCAIsevere
280.301	-1.89557	0.316138	-5.99603	2.022e-09	2.98473e-08	IL11	lower in PUCAIsevere
467.032	-1.89129	0.261052	-7.24487	4.32856e-13	1.80148e-11	TCN1	lower in PUCAIsevere
136.784	-1.88876	0.237579	-7.95005	1.86435e-15	1.51594e-13	MEDAG	lower in PUCAIsevere
1215.08	-1.88774	0.396819	-4.75717	1.96323e-06	1.26219e-05	SERPINB7	lower in PUCAIsevere
1734.25	-1.87183	0.208652	-8.97102	2.93773e-19	7.25001e-17	CEMIP	lower in PUCAIsevere
22.2674	-1.87054	0.222195	-8.41845	3.81514e-17	4.92363e-15	PGLYRP1	lower in PUCAIsevere
6600.82	-1.84088	0.286437	-6.42684	1.30285e-10	2.6408e-09	MMP3	lower in PUCAIsevere
472.085	-1.83926	0.226473	-8.12134	4.61065e-16	4.29523e-14	STC1	lower in PUCAIsevere
187.778	-1.82622	0.213637	-8.54822	1.24997e-17	1.93712e-15	TNFAIP6	lower in PUCAIsevere
123.564	-1.82315	0.205345	-8.8785	6.77673e-19	1.53755e-16	GPR84	lower in PUCAIsevere
1907.54	-1.81527	0.418379	-4.33882	1.4325e-05	7.21223e-05	REG1B	lower in PUCAIsevere
221.973	-1.8107	0.214571	-8.43871	3.20848e-17	4.29845e-15	APOBEC3A	lower in PUCAIsevere
95.9249	-1.79242	0.190706	-9.39888	5.51444e-21	2.58011e-18	GLT1D1	lower in PUCAIsevere
96.1081	-1.77744	0.195753	-9.08002	1.08554e-19	3.05407e-17	BEAN1	lower in PUCAIsevere
43.9259	-1.77237	0.270063	-6.56278	5.2814e-11	1.20022e-09	CSF2	lower in PUCAIsevere
123.711	-1.76198	0.222538	-7.91765	2.42035e-15	1.90207e-13	CLEC5A	lower in PUCAIsevere
332.668	-1.76096	0.228342	-7.71193	1.23927e-14	7.7479e-13	CD300E	lower in PUCAIsevere
5142.32	-1.75365	0.247158	-7.09527	1.291e-12	4.75404e-11	CHI3L1	lower in PUCAIsevere
1695.55	-1.73518	0.201472	-8.61249	7.14884e-18	1.22638e-15	IL1RN	lower in PUCAIsevere
79.7323	-1.72949	0.193991	-8.9153	4.86493e-19	1.12189e-16	LYPD1	lower in PUCAIsevere
935.353	-1.70867	0.194903	-8.76677	1.83858e-18	3.64272e-16	CXCL6	lower in PUCAIsevere
386.845	-1.70364	0.287809	-5.91933	3.23258e-09	4.48007e-08	OSM	lower in PUCAIsevere
350.882	-1.70271	0.244139	-6.97435	3.07292e-12	1.01234e-10	CXCR1	lower in PUCAIsevere
358.076	-1.68281	0.264532	-6.36147	1.99833e-10	3.85603e-09	HCAR2	lower in PUCAIsevere
129.04	-1.65223	0.45641	-3.62007	0.000294528	0.0010402	CTD-3214H19.16	lower in PUCAIsevere
76.4195	-1.64809	0.201516	-8.17845	2.87521e-16	2.86848e-14	PADI4	lower in PUCAIsevere
201.077	-1.64351	0.23362	-7.03497	1.99303e-12	6.95681e-11	FAM83A	lower in PUCAIsevere
21.466	-1.6395	0.217417	-7.54081	4.67065e-14	2.47932e-12	ZDHHC19	lower in PUCAIsevere
154.117	-1.62186	0.266342	-6.0894	1.13334e-09	1.80144e-08	GAS1	lower in PUCAIsevere
870.759	-1.61552	0.230411	-7.01147	2.35822e-12	8.03223e-11	FCGR3B	lower in PUCAIsevere
45.9146	-1.61052	0.230739	-6.97983	2.95547e-12	9.75929e-11	HP	lower in PUCAIsevere
72.4867	-1.6092	0.176945	-9.09437	9.51321e-20	2.78797e-17	FAM132B	lower in PUCAIsevere
176.903	-1.60546	0.221889	-7.23542	4.6409e-13	1.91295e-11	IL1A	lower in PUCAIsevere
2848.25	-1.60357	0.239336	-6.70009	2.08293e-11	5.34461e-10	IL1B	lower in PUCAIsevere
407.811	-1.60329	0.251361	-6.37844	1.78901e-10	3.50013e-09	SELE	lower in PUCAIsevere
1068.24	-1.6008	0.256116	-6.25028	4.09713e-10	7.26789e-09	MMP10	lower in PUCAIsevere
110.357	-1.59987	0.195474	-8.18458	2.73256e-16	2.74564e-14	KRT80	lower in PUCAIsevere
858.536	-1.59184	0.201369	-7.90507	2.67778e-15	2.04719e-13	FPR1	lower in PUCAIsevere
186.562	-1.59168	0.302673	-5.25875	1.4504e-07	1.26489e-06	IL6	lower in PUCAIsevere
2220.95	-1.59127	0.175941	-9.04433	1.5058e-19	3.99663e-17	CSF3R	lower in PUCAIsevere
257.864	-1.58674	0.23687	-6.69879	2.10154e-11	5.37497e-10	TREM1	lower in PUCAIsevere
13.2573	-1.58642	0.240682	-6.59135	4.35833e-11	1.01673e-09	C11orf91	lower in PUCAIsevere
87.4626	-1.5844	0.201953	-7.8454	4.31582e-15	3.09748e-13	SYT12	lower in PUCAIsevere
169.015	-1.57925	0.27667	-5.70808	1.14257e-08	1.35826e-07	DSG3	lower in PUCAIsevere
376.782	-1.57292	0.182852	-8.60212	7.82581e-18	1.31054e-15	LILRA5	lower in PUCAIsevere
77.9309	-1.53461	0.203927	-7.52529	5.26053e-14	2.6909e-12	PLA2G3	lower in PUCAIsevere
256.783	-1.53245	0.185878	-8.24438	1.66014e-16	1.78269e-14	FIBIN	lower in PUCAIsevere
746.337	-1.53139	0.211742	-7.23235	4.74705e-13	1.94684e-11	ADAMTS4	lower in PUCAIsevere
46.8463	-1.52598	0.206047	-7.40599	1.30171e-13	6.10371e-12	CA9	lower in PUCAIsevere
411.001	-1.52331	0.213338	-7.14035	9.30967e-13	3.5299e-11	CXCR2	lower in PUCAIsevere
150.397	-1.51733	0.249394	-6.08407	1.17167e-09	1.85398e-08	KRT17	lower in PUCAIsevere
378.587	-1.51668	0.155511	-9.75292	1.79242e-22	1.32705e-19	C6orf223	lower in PUCAIsevere
935.899	-1.51651	0.171414	-8.84707	8.98477e-19	1.91498e-16	ALPL	lower in PUCAIsevere
52.3831	-1.5052	0.248128	-6.06623	1.30948e-09	2.03766e-08	CMTM2	lower in PUCAIsevere
890.957	-1.50188	0.237106	-6.33423	2.38523e-10	4.54648e-09	C4BPA	lower in PUCAIsevere
255.516	-1.49907	0.160018	-9.36812	7.38338e-21	3.24569e-18	LILRA6	lower in PUCAIsevere
517.346	-1.4761	0.198581	-7.43321	1.05989e-13	5.07127e-12	WISP1	lower in PUCAIsevere
1098.6	-1.46908	0.159185	-9.2288	2.73673e-20	9.38967e-18	AGT	lower in PUCAIsevere
875.091	-1.45973	0.220538	-6.61894	3.61787e-11	8.64052e-10	SERPINA3	lower in PUCAIsevere
379.061	-1.45381	0.177077	-8.21005	2.21091e-16	2.25368e-14	ADGRG3	lower in PUCAIsevere
125.1	-1.4534	0.191336	-7.59605	3.05311e-14	1.71108e-12	RGS4	lower in PUCAIsevere
278.613	-1.438	0.231136	-6.22147	4.92506e-10	8.57436e-09	VSIG1	lower in PUCAIsevere
887.138	-1.43532	0.145067	-9.89417	4.41245e-23	4.43357e-20	STEAP4	lower in PUCAIsevere
219.334	-1.43368	0.190439	-7.52829	5.14106e-14	2.65889e-12	CLEC4E	lower in PUCAIsevere
4559.76	-1.40711	0.152403	-9.23284	2.6356e-20	9.26873e-18	PLAU	lower in PUCAIsevere
609.493	-1.39578	0.223263	-6.25173	4.05942e-10	7.21008e-09	CLDN2	lower in PUCAIsevere
4936.73	-1.39463	0.186694	-7.47014	8.01094e-14	3.8993e-12	TNC	lower in PUCAIsevere
1155.68	-1.37886	0.233196	-5.91287	3.36205e-09	4.63182e-08	SAA2	lower in PUCAIsevere
3107.92	-1.37676	0.246747	-5.57963	2.41037e-08	2.62842e-07	TNIP3	lower in PUCAIsevere
1305.25	-1.37617	0.152324	-9.0345	1.64759e-19	4.29197e-17	PDPN	lower in PUCAIsevere
530.48	-1.376	0.137795	-9.98589	1.75718e-23	2.24711e-20	LILRB3	lower in PUCAIsevere
6852.83	-1.37592	0.143647	-9.57848	9.8485e-22	6.02343e-19	ANXA1	lower in PUCAIsevere
74.2201	-1.37267	0.196047	-7.00175	2.5279e-12	8.50716e-11	GAL	lower in PUCAIsevere
88.5828	-1.36799	0.242134	-5.64972	1.60705e-08	1.83344e-07	SAA2-SAA4	lower in PUCAIsevere
876.307	-1.36742	0.19826	-6.89711	5.30716e-12	1.64803e-10	CDH3	lower in PUCAIsevere
393.585	-1.35959	0.243991	-5.57232	2.51371e-08	2.73052e-07	CXCL11	lower in PUCAIsevere
91.0431	-1.33935	0.174222	-7.68761	1.49906e-14	9.16839e-13	FCN3	lower in PUCAIsevere
486.926	-1.33854	0.15764	-8.49112	2.0465e-17	2.90789e-15	TNFRSF11B	lower in PUCAIsevere
246.186	-1.33762	0.180219	-7.4222	1.15189e-13	5.48906e-12	TNFRSF10C	lower in PUCAIsevere
866.05	-1.33204	0.21574	-6.17428	6.64665e-10	1.10911e-08	G0S2	lower in PUCAIsevere
1001.1	-1.3287	0.252608	-5.25992	1.44115e-07	1.26074e-06	MMP7	lower in PUCAIsevere
757.697	-1.32662	0.206145	-6.4354	1.23147e-10	2.5106e-09	ANGPTL4	lower in PUCAIsevere
379.182	-1.31941	0.153188	-8.613	7.11723e-18	1.22638e-15	CLDN1	lower in PUCAIsevere
279.285	-1.30965	0.140572	-9.31663	1.2009e-20	4.96394e-18	MDFI	lower in PUCAIsevere
647.076	-1.29998	0.17111	-7.59733	3.02297e-14	1.7077e-12	C2CD4A	lower in PUCAIsevere
3504.4	-1.29711	0.147443	-8.79739	1.40035e-18	2.94011e-16	ITGA2	lower in PUCAIsevere
1429.29	-1.29553	0.152011	-8.52266	1.55935e-17	2.28742e-15	WNT5A	lower in PUCAIsevere
195.979	-1.28642	0.211335	-6.08709	1.14981e-09	1.82349e-08	FOSL1	lower in PUCAIsevere
6448.56	-1.28242	0.199188	-6.43825	1.20857e-10	2.47468e-09	SLC6A14	lower in PUCAIsevere
287.689	-1.27874	0.15488	-8.25631	1.50241e-16	1.63832e-14	PAPPA	lower in PUCAIsevere
783.601	-1.27646	0.169109	-7.54814	4.41513e-14	2.35256e-12	TNS4	lower in PUCAIsevere
9286.64	-1.27505	0.152959	-8.33588	7.69237e-17	9.40944e-15	CD55	lower in PUCAIsevere
2435.47	-1.2744	0.130055	-9.79891	1.13806e-22	9.5472e-20	FCGR2A	lower in PUCAIsevere
599.89	-1.27104	0.130889	-9.71081	2.71182e-22	1.81653e-19	HK3	lower in PUCAIsevere
437.285	-1.27077	0.139998	-9.07704	1.11563e-19	3.07717e-17	STRIP2	lower in PUCAIsevere
17.6559	-1.26239	0.203814	-6.19383	5.87186e-10	9.92782e-09	PPBP	lower in PUCAIsevere
1216.6	-1.25076	0.233477	-5.35712	8.45605e-08	7.93088e-07	PTGS2	lower in PUCAIsevere
52.5944	-1.24823	0.216319	-5.77034	7.91132e-09	9.90111e-08	AC018755.18	lower in PUCAIsevere
164.037	-1.2431	0.160153	-7.76192	8.36554e-15	5.55085e-13	FJX1	lower in PUCAIsevere
647.636	-1.24074	0.167777	-7.39517	1.41231e-13	6.57848e-12	AZGP1	lower in PUCAIsevere
442.897	-1.24031	0.159619	-7.77045	7.82101e-15	5.26403e-13	FFAR2	lower in PUCAIsevere
651.376	-1.23851	0.136644	-9.06371	1.26089e-19	3.41094e-17	PSAT1	lower in PUCAIsevere
1001.37	-1.2245	0.148224	-8.26116	1.44262e-16	1.58542e-14	CD274	lower in PUCAIsevere
1483.65	-1.22218	0.202574	-6.03329	1.60658e-09	2.45892e-08	SERPINB5	lower in PUCAIsevere
8165.9	-1.21866	0.175747	-6.93414	4.08713e-12	1.31264e-10	MMP12	lower in PUCAIsevere
226.223	-1.21795	0.160317	-7.59715	3.02717e-14	1.7077e-12	FLRT3	lower in PUCAIsevere
691.78	-1.21391	0.157563	-7.7043	1.31561e-14	8.1527e-13	VNN2	lower in PUCAIsevere
2378.45	-1.19428	0.118575	-10.0719	7.35306e-24	1.03435e-20	ACSL1	lower in PUCAIsevere
513.308	-1.18281	0.242427	-4.87901	1.06617e-06	7.4027e-06	SPP1	lower in PUCAIsevere
217.472	-1.18083	0.133367	-8.85394	8.44841e-19	1.82837e-16	GPR4	lower in PUCAIsevere
251.557	-1.18077	0.147401	-8.01062	1.14133e-15	1.00808e-13	CREB5	lower in PUCAIsevere
455.48	-1.18013	0.214628	-5.49852	3.82984e-08	3.95553e-07	CCL3	lower in PUCAIsevere
149.884	-1.17706	0.170714	-6.89492	5.38942e-12	1.66622e-10	SIGLEC5	lower in PUCAIsevere
77.8973	-1.17244	0.17342	-6.76072	1.37311e-11	3.77255e-10	OLR1	lower in PUCAIsevere
115.403	-1.17001	0.199773	-5.85673	4.72068e-09	6.27062e-08	FOXQ1	lower in PUCAIsevere
79.7969	-1.1655	0.2538	-4.59219	4.38623e-06	2.5666e-05	SAA4	lower in PUCAIsevere
2480.35	-1.16177	0.176468	-6.58343	4.59727e-11	1.06016e-09	FADS2	lower in PUCAIsevere
13485.3	-1.16089	0.144929	-8.01005	1.14661e-15	1.00808e-13	COL4A1	lower in PUCAIsevere
169.7	-1.14876	0.195423	-5.87835	4.14386e-09	5.57816e-08	PALM2-AKAP2	lower in PUCAIsevere
1104.2	-1.14517	0.115337	-9.9289	3.11671e-23	3.37252e-20	DYSF	lower in PUCAIsevere
2718.55	-1.13247	0.218669	-5.17893	2.23159e-07	1.83149e-06	IDO1	lower in PUCAIsevere
12903.7	-1.1262	0.12716	-8.85657	8.25155e-19	1.81366e-16	NAMPT	lower in PUCAIsevere
9082.28	-1.12555	0.162496	-6.9266	4.31069e-12	1.37191e-10	CXCL1	lower in PUCAIsevere
937.602	-1.12214	0.169859	-6.60629	3.94069e-11	9.33227e-10	C4BPB	lower in PUCAIsevere
3639.42	-1.11761	0.148759	-7.51295	5.78118e-14	2.92532e-12	PLEK	lower in PUCAIsevere
190.815	-1.11361	0.149289	-7.45944	8.68911e-14	4.21482e-12	SUCNR1	lower in PUCAIsevere
1047.81	-1.11255	0.140533	-7.91662	2.44048e-15	1.90724e-13	NRG1	lower in PUCAIsevere
101.818	-1.1118	0.236534	-4.70037	2.59692e-06	1.61495e-05	EGFL6	lower in PUCAIsevere
1871.66	-1.11106	0.411494	-2.70007	0.00693248	0.0165399	REG3A	lower in PUCAIsevere
12384.5	-1.11059	0.197123	-5.63399	1.76083e-08	1.98633e-07	DUOXA2	lower in PUCAIsevere
2408.69	-1.10617	0.191253	-5.78383	7.30195e-09	9.22164e-08	COL7A1	lower in PUCAIsevere
6301.74	-1.09836	0.199146	-5.51536	3.48075e-08	3.64585e-07	GREM1	lower in PUCAIsevere
121.96	-1.09779	0.19122	-5.74096	9.41429e-09	1.14362e-07	AOX1	lower in PUCAIsevere
154.249	-1.09234	0.154348	-7.07709	1.47213e-12	5.31009e-11	LILRA2	lower in PUCAIsevere
153.506	-1.09224	0.18216	-5.99602	2.02207e-09	2.98473e-08	NRCAM	lower in PUCAIsevere
1111.9	-1.08506	0.199127	-5.4491	5.06248e-08	5.065e-07	SERPINE1	lower in PUCAIsevere
324.242	-1.08467	0.276278	-3.92599	8.6374e-05	0.000354873	TM4SF20	lower in PUCAIsevere
1514.03	-1.0835	0.137965	-7.85341	4.0487e-15	2.92067e-13	BCL6	lower in PUCAIsevere
190.821	-1.08341	0.150276	-7.20946	5.61753e-13	2.28387e-11	GJA5	lower in PUCAIsevere
2721.81	-1.08296	0.299423	-3.61683	0.000298228	0.00105116	CXCL5	lower in PUCAIsevere
623.379	-1.08262	0.181201	-5.97467	2.30555e-09	3.34697e-08	ADGRF1	lower in PUCAIsevere
825.61	-1.08001	0.148939	-7.25135	4.1264e-13	1.73272e-11	FGF7	lower in PUCAIsevere
181.505	-1.07994	0.166481	-6.48683	8.76586e-11	1.86268e-09	RNF183	lower in PUCAIsevere
221.843	-1.07597	0.244791	-4.39544	1.10548e-05	5.75922e-05	IL13RA2	lower in PUCAIsevere
2072.61	-1.07516	0.280049	-3.8392	0.000123435	0.000483665	SAA1	lower in PUCAIsevere
74.7955	-1.07486	0.155481	-6.91312	4.74097e-12	1.49868e-10	HRH2	lower in PUCAIsevere
224.046	-1.07057	0.138916	-7.7066	1.29213e-14	8.04267e-13	MEFV	lower in PUCAIsevere
4473.76	-1.0699	0.130964	-8.16945	3.0981e-16	3.06908e-14	PFKFB3	lower in PUCAIsevere
288.348	-1.06948	0.0987099	-10.8345	2.36135e-27	8.30427e-24	SRPX2	lower in PUCAIsevere
112.355	-1.067	0.248933	-4.28632	1.81661e-05	8.93503e-05	RP11-407N17.3	lower in PUCAIsevere
5192.63	-1.06666	0.18487	-5.76977	7.93814e-09	9.92585e-08	SOCS3	lower in PUCAIsevere
225.962	-1.06431	0.22198	-4.79463	1.62975e-06	1.06848e-05	HAS3	lower in PUCAIsevere
529.838	-1.06072	0.168861	-6.28164	3.35009e-10	6.10437e-09	BCL2A1	lower in PUCAIsevere
530.516	-1.06018	0.138384	-7.66116	1.84255e-14	1.09827e-12	HGF	lower in PUCAIsevere
173.856	-1.05368	0.169354	-6.22174	4.91661e-10	8.57025e-09	XKR9	lower in PUCAIsevere
86.6552	-1.05229	0.169306	-6.21533	5.1216e-10	8.8549e-09	TNFSF9	lower in PUCAIsevere
273.169	-1.05061	0.139148	-7.5503	4.34241e-14	2.33359e-12	ADAMTS12	lower in PUCAIsevere
3467.09	-1.04426	0.130956	-7.9741	1.53491e-15	1.27761e-13	PHLDA1	lower in PUCAIsevere
55.6506	-1.04014	0.165919	-6.26893	3.6353e-10	6.531e-09	FGF10	lower in PUCAIsevere
599.51	-1.03784	0.183132	-5.66713	1.45205e-08	1.67977e-07	CCL4	lower in PUCAIsevere
499.689	-1.03602	0.137801	-7.51819	5.55403e-14	2.82052e-12	MYEOV	lower in PUCAIsevere
14578.9	-1.03513	0.149759	-6.91194	4.78059e-12	1.50782e-10	IGFBP5	lower in PUCAIsevere
1105.89	-1.03081	0.199201	-5.17472	2.28252e-07	1.86567e-06	CXCL10	lower in PUCAIsevere
127.559	-1.02705	0.112466	-9.1321	6.71812e-20	2.05443e-17	PLEKHN1	lower in PUCAIsevere
10.5235	-1.02672	0.40036	-2.56448	0.0103331	0.0233503	FAM25G	lower in PUCAIsevere
9592.52	-1.02445	0.133931	-7.6491	2.02385e-14	1.19114e-12	ERO1A	lower in PUCAIsevere
350	-1.01925	0.169106	-6.0273	1.6672e-09	2.53267e-08	RGS16	lower in PUCAIsevere
378.025	-1.01205	0.193886	-5.2198	1.79113e-07	1.5261e-06	HBB	lower in PUCAIsevere
42.3613	-1.00981	0.208111	-4.85226	1.22064e-06	8.34338e-06	ESM1	lower in PUCAIsevere
137.361	-1.00911	0.136151	-7.41167	1.24723e-13	5.86783e-12	SLC4A11	lower in PUCAIsevere
1501.11	-1.00736	0.118327	-8.51336	1.68958e-17	2.42523e-15	TRPA1	lower in PUCAIsevere
592.012	-1.00527	0.148818	-6.75501	1.42827e-11	3.8937e-10	CCDC3	lower in PUCAIsevere
315.112	-1.00363	0.178697	-5.61639	1.94988e-08	2.17863e-07	COL8A1	lower in PUCAIsevere
1091.45	-1.0019	0.132568	-7.55762	4.10502e-14	2.22955e-12	SLC7A11	lower in PUCAIsevere
194.966	-1.0009	0.280643	-3.56646	0.000361839	0.00124785	VIP	lower in PUCAIsevere
88.5878	-1.0009	0.147658	-6.77854	1.21396e-11	3.41536e-10	SULT2B1	lower in PUCAIsevere
57.7566	-0.999674	0.187441	-5.33328	9.64543e-08	8.83348e-07	FAM92B	lower in PUCAIsevere
361.281	-0.994578	0.138422	-7.18514	6.71386e-13	2.67546e-11	TUBB3	lower in PUCAIsevere
631.292	-0.990344	0.179366	-5.52137	3.36376e-08	3.54177e-07	FCN1	lower in PUCAIsevere
635.532	-0.990325	0.115923	-8.54293	1.3086e-17	2.00087e-15	TLR2	lower in PUCAIsevere
1915.87	-0.98714	0.114205	-8.64358	5.44762e-18	9.64359e-16	SLC7A5	lower in PUCAIsevere
1620.48	-0.986695	0.167748	-5.88199	4.05361e-09	5.47764e-08	DOC2B	lower in PUCAIsevere
1132.05	-0.986665	0.101313	-9.73879	2.06e-22	1.4489e-19	FADS1	lower in PUCAIsevere
651.705	-0.98421	0.125232	-7.85909	3.86949e-15	2.82032e-13	C5AR1	lower in PUCAIsevere
583.189	-0.981323	0.168275	-5.83165	5.48832e-09	7.17512e-08	SLC6A20	lower in PUCAIsevere
1154.8	-0.978883	0.113982	-8.58806	8.84522e-18	1.44681e-15	ADAMTS2	lower in PUCAIsevere
2242.25	-0.978231	0.193578	-5.05342	4.33963e-07	3.31229e-06	CCL18	lower in PUCAIsevere
372.175	-0.972373	0.127131	-7.64857	2.03223e-14	1.19114e-12	SGIP1	lower in PUCAIsevere
21.6108	-0.971822	0.176397	-5.50927	3.60315e-08	3.74616e-07	LINC00694	lower in PUCAIsevere
307.39	-0.971699	0.141526	-6.86587	6.60868e-12	1.98204e-10	HSPA6	lower in PUCAIsevere
10821.4	-0.970906	0.134193	-7.23513	4.6508e-13	1.91295e-11	TGM2	lower in PUCAIsevere
359.084	-0.970756	0.139419	-6.96285	3.33446e-12	1.0883e-10	ANGPT2	lower in PUCAIsevere
319.57	-0.969552	0.105208	-9.21561	3.0951e-20	1.03664e-17	TRIB3	lower in PUCAIsevere
77.5492	-0.967641	0.145063	-6.67047	2.54992e-11	6.31508e-10	LRRC4	lower in PUCAIsevere
801.061	-0.964826	0.147673	-6.53352	6.42401e-11	1.42985e-09	MNDA	lower in PUCAIsevere
1914.99	-0.956005	0.164953	-5.79564	6.80624e-09	8.66453e-08	SLC2A3	lower in PUCAIsevere
1576.63	-0.952599	0.114412	-8.32603	8.36007e-17	9.88245e-15	ADGRG6	lower in PUCAIsevere
817.742	-0.950224	0.128734	-7.38129	1.5676e-13	7.19332e-12	HTRA3	lower in PUCAIsevere
39.3382	-0.945318	0.19885	-4.75393	1.99505e-06	1.28031e-05	IFNG	lower in PUCAIsevere
1087.66	-0.944417	0.122797	-7.69087	1.46138e-14	8.97693e-13	LILRB2	lower in PUCAIsevere
1111.35	-0.943949	0.129743	-7.27553	3.4507e-13	1.48899e-11	ADGRE2	lower in PUCAIsevere
2380.93	-0.941248	0.126876	-7.41864	1.18333e-13	5.58587e-12	LOXL2	lower in PUCAIsevere
2874.63	-0.938454	0.107318	-8.74465	2.23709e-18	4.37072e-16	ITGA5	lower in PUCAIsevere
1291.81	-0.936599	0.109913	-8.52129	1.57793e-17	2.28832e-15	NCF2	lower in PUCAIsevere
313.508	-0.936531	0.200293	-4.67581	2.92792e-06	1.79725e-05	THBS2	lower in PUCAIsevere
211.356	-0.935266	0.136505	-6.85152	7.30677e-12	2.17303e-10	IL18RAP	lower in PUCAIsevere
553.841	-0.934994	0.207923	-4.49684	6.89715e-06	3.81077e-05	CHRDL2	lower in PUCAIsevere
91.4711	-0.934505	0.162228	-5.76046	8.38867e-09	1.03778e-07	CBS	lower in PUCAIsevere
3139.72	-0.932972	0.113091	-8.24976	1.58708e-16	1.71734e-14	ACSL4	lower in PUCAIsevere
13389.2	-0.932379	0.137937	-6.75946	1.38504e-11	3.79792e-10	COL6A3	lower in PUCAIsevere
384.233	-0.930421	0.12228	-7.60893	2.76379e-14	1.58687e-12	INSC	lower in PUCAIsevere
45.5238	-0.928671	0.117044	-7.9344	2.11518e-15	1.69058e-13	C3orf36	lower in PUCAIsevere
1071.32	-0.928604	0.140536	-6.60761	3.90574e-11	9.2651e-10	MMP25	lower in PUCAIsevere
754.062	-0.925052	0.137379	-6.73358	1.65541e-11	4.40192e-10	IL2RA	lower in PUCAIsevere
181.82	-0.925035	0.103171	-8.96606	3.07313e-19	7.45339e-17	SIGLEC9	lower in PUCAIsevere
24477.1	-0.923166	0.114251	-8.08015	6.46862e-16	5.87059e-14	SOD2	lower in PUCAIsevere
148.989	-0.921645	0.152662	-6.03716	1.56851e-09	2.4035e-08	SNAI1	lower in PUCAIsevere
69.631	-0.919268	0.204958	-4.48516	7.28604e-06	3.99247e-05	CLDN14	lower in PUCAIsevere
816.201	-0.91769	0.10955	-8.37694	5.43238e-17	6.82297e-15	CCR1	lower in PUCAIsevere
3683.96	-0.917502	0.110136	-8.33065	8.04017e-17	9.66675e-15	PXDN	lower in PUCAIsevere
252.975	-0.906214	0.108779	-8.33081	8.02887e-17	9.66675e-15	RASGRP4	lower in PUCAIsevere
1260.36	-0.903987	0.114625	-7.88648	3.10835e-15	2.35082e-13	COL5A3	lower in PUCAIsevere
342.621	-0.903882	0.210634	-4.29125	1.77674e-05	8.77233e-05	KRT7	lower in PUCAIsevere
932.428	-0.903664	0.13713	-6.58983	4.40333e-11	1.02383e-09	KYNU	lower in PUCAIsevere
223.029	-0.903069	0.189507	-4.76535	1.88526e-06	1.21651e-05	FAP	lower in PUCAIsevere
505.124	-0.897847	0.17072	-5.25918	1.44703e-07	1.26352e-06	TDO2	lower in PUCAIsevere
171.256	-0.892765	0.124718	-7.15828	8.16954e-13	3.16009e-11	KCNJ8	lower in PUCAIsevere
691.994	-0.891603	0.138137	-6.45448	1.08592e-10	2.24641e-09	TNFRSF12A	lower in PUCAIsevere
363.594	-0.891442	0.151428	-5.88689	3.93534e-09	5.32804e-08	SPHK1	lower in PUCAIsevere
386.559	-0.890371	0.136146	-6.53984	6.15845e-11	1.37292e-09	CHAC1	lower in PUCAIsevere
635.75	-0.888659	0.105237	-8.44437	3.05701e-17	4.17504e-15	LRP8	lower in PUCAIsevere
1947.27	-0.887934	0.119638	-7.42184	1.15502e-13	5.48906e-12	ANGPTL2	lower in PUCAIsevere
12721.3	-0.886448	0.112414	-7.88553	3.13198e-15	2.35602e-13	WARS	lower in PUCAIsevere
2625.73	-0.886414	0.170388	-5.20232	1.96815e-07	1.64797e-06	COL12A1	lower in PUCAIsevere
725.486	-0.886074	0.0875926	-10.1159	4.69913e-24	7.34474e-21	BNIP3	lower in PUCAIsevere
19918.7	-0.885909	0.195614	-4.52886	5.93041e-06	3.3389e-05	NOS2	lower in PUCAIsevere
1598.61	-0.881864	0.117292	-7.51856	5.53814e-14	2.82052e-12	MRC1	lower in PUCAIsevere
263.877	-0.87723	0.179866	-4.87713	1.07642e-06	7.46278e-06	ENKUR	lower in PUCAIsevere
92.3265	-0.876431	0.164293	-5.33456	9.57746e-08	8.7884e-07	FCGR1B	lower in PUCAIsevere
1477.7	-0.873362	0.167569	-5.21195	1.86864e-07	1.58446e-06	NNMT	lower in PUCAIsevere
112.76	-0.870445	0.158833	-5.48025	4.24718e-08	4.34121e-07	ACKR4	lower in PUCAIsevere
3254.65	-0.869213	0.126261	-6.88428	5.80817e-12	1.77616e-10	ADM	lower in PUCAIsevere
181.547	-0.867455	0.129501	-6.69843	2.10675e-11	5.37853e-10	LILRA1	lower in PUCAIsevere
8377.13	-0.866458	0.101667	-8.52253	1.56105e-17	2.28742e-15	STOM	lower in PUCAIsevere
260.834	-0.866104	0.161579	-5.36025	8.31063e-08	7.81455e-07	SIRPB1	lower in PUCAIsevere
5200.58	-0.866	0.122471	-7.07106	1.53755e-12	5.51752e-11	LAMA3	lower in PUCAIsevere
1794.38	-0.863051	0.175521	-4.91708	8.78444e-07	6.20958e-06	CXCL2	lower in PUCAIsevere
590.34	-0.862386	0.127015	-6.78963	1.1242e-11	3.18834e-10	TMEM158	lower in PUCAIsevere
201.015	-0.86217	0.250651	-3.43973	0.000582296	0.0019005	CCL4L2	lower in PUCAIsevere
265.733	-0.862069	0.137154	-6.28542	3.26961e-10	5.9732e-09	HECW2	lower in PUCAIsevere
53386	-0.861596	0.175963	-4.89646	9.75766e-07	6.82551e-06	DUOX2	lower in PUCAIsevere
3292.36	-0.857838	0.145466	-5.89717	3.69797e-09	5.04552e-08	CXCL3	lower in PUCAIsevere
191.202	-0.856325	0.117777	-7.27074	3.57532e-13	1.52406e-11	OSCAR	lower in PUCAIsevere
185.06	-0.856058	0.173075	-4.94618	7.56841e-07	5.44299e-06	F5	lower in PUCAIsevere
226.807	-0.855953	0.169832	-5.03999	4.65558e-07	3.52476e-06	GFPT2	lower in PUCAIsevere
1848.54	-0.855233	0.113596	-7.52873	5.12375e-14	2.65889e-12	OSMR	lower in PUCAIsevere
225.377	-0.854084	0.164459	-5.19329	2.06613e-07	1.71572e-06	CTHRC1	lower in PUCAIsevere
930.248	-0.851592	0.103325	-8.24185	1.69568e-16	1.80706e-14	ARNTL2	lower in PUCAIsevere
7557.77	-0.851523	0.13563	-6.27829	3.42322e-10	6.21347e-09	RGS5	lower in PUCAIsevere
51.2716	-0.851518	0.348345	-2.44447	0.0145067	0.0311884	RP11-468E2.2	lower in PUCAIsevere
460.46	-0.848643	0.14601	-5.81221	6.1654e-09	7.97872e-08	PTGES	lower in PUCAIsevere
587.592	-0.848046	0.135702	-6.24932	4.12243e-10	7.30355e-09	DUSP4	lower in PUCAIsevere
1546.05	-0.845513	0.187087	-4.51936	6.20256e-06	3.47298e-05	C11orf96	lower in PUCAIsevere
13579.4	-0.839268	0.188054	-4.46292	8.08517e-06	4.37439e-05	REG4	lower in PUCAIsevere
1886.58	-0.836595	0.0889828	-9.40176	5.36598e-21	2.58011e-18	SPON2	lower in PUCAIsevere
7078.24	-0.834871	0.134588	-6.20318	5.53336e-10	9.46932e-09	LAMC2	lower in PUCAIsevere
13555.2	-0.833272	0.119795	-6.95583	3.50501e-12	1.13606e-10	COL4A2	lower in PUCAIsevere
496.358	-0.829828	0.119422	-6.94867	3.68738e-12	1.19022e-10	PHGDH	lower in PUCAIsevere
541.871	-0.829805	0.10353	-8.01514	1.10008e-15	9.79418e-14	WNT4	lower in PUCAIsevere
3383.19	-0.829161	0.124748	-6.64669	2.99766e-11	7.28151e-10	ICAM1	lower in PUCAIsevere
73.8734	-0.828992	0.16292	-5.08834	3.61214e-07	2.8104e-06	GLYATL1	lower in PUCAIsevere
548.335	-0.827744	0.105305	-7.86046	3.82734e-15	2.80413e-13	GNA15	lower in PUCAIsevere
268.582	-0.826989	0.155016	-5.33485	9.5624e-08	8.78165e-07	LPL	lower in PUCAIsevere
4613.86	-0.825012	0.121731	-6.77732	1.22425e-11	3.42376e-10	GBP1	lower in PUCAIsevere
395	-0.820109	0.287513	-2.85242	0.00433879	0.0110508	MUC5AC	lower in PUCAIsevere
1097.51	-0.819909	0.127558	-6.42772	1.29528e-10	2.62925e-09	FGR	lower in PUCAIsevere
294.301	-0.818708	0.200334	-4.08672	4.37516e-05	0.000195942	DIO2	lower in PUCAIsevere
161.074	-0.817147	0.152685	-5.35185	8.70617e-08	8.12133e-07	SMOC1	lower in PUCAIsevere
815.03	-0.816453	0.0956863	-8.5326	1.43093e-17	2.14137e-15	FAM65C	lower in PUCAIsevere
965.987	-0.815672	0.100374	-8.12632	4.42533e-16	4.19542e-14	ADAMTS9	lower in PUCAIsevere
440.688	-0.813953	0.118541	-6.86643	6.58263e-12	1.98204e-10	PCDH17	lower in PUCAIsevere
28.1616	-0.812505	0.175067	-4.64111	3.46542e-06	2.08058e-05	CD70	lower in PUCAIsevere
259.715	-0.811293	0.148636	-5.45827	4.80808e-08	4.84494e-07	FCGR1A	lower in PUCAIsevere
45.0123	-0.810061	0.151904	-5.33271	9.67595e-08	8.85566e-07	S100A3	lower in PUCAIsevere
2287.23	-0.810034	0.133587	-6.06374	1.32989e-09	2.06485e-08	ITGB6	lower in PUCAIsevere
535.27	-0.80987	0.134341	-6.02847	1.65521e-09	2.5199e-08	LAMC3	lower in PUCAIsevere
82.1034	-0.809426	0.184085	-4.39701	1.09751e-05	5.72015e-05	TWIST1	lower in PUCAIsevere
742.776	-0.808562	0.159015	-5.08482	3.67977e-07	2.85828e-06	RND1	lower in PUCAIsevere
58.1109	-0.807924	0.200908	-4.02136	5.78643e-05	0.000250223	DPEP1	lower in PUCAIsevere
245.811	-0.804495	0.14796	-5.43726	5.4106e-08	5.38266e-07	LYVE1	lower in PUCAIsevere
693.41	-0.803153	0.11656	-6.89048	5.56034e-12	1.71154e-10	ITGAM	lower in PUCAIsevere
5366.87	-0.802758	0.124265	-6.46004	1.04677e-10	2.17501e-09	APOL1	lower in PUCAIsevere
113.676	-0.802333	0.10244	-7.83223	4.79273e-15	3.4223e-13	SPOCD1	lower in PUCAIsevere
5134.96	-0.801885	0.113222	-7.08243	1.41646e-12	5.13539e-11	COL5A2	lower in PUCAIsevere
173.316	-0.796432	0.214258	-3.71716	0.000201474	0.000744452	FAM3B	lower in PUCAIsevere
128.127	-0.794827	0.117096	-6.7878	1.13855e-11	3.22131e-10	CYP27B1	lower in PUCAIsevere
3512.05	-0.791732	0.186558	-4.2439	2.19668e-05	0.000105824	TNFRSF6B	lower in PUCAIsevere
471.609	-0.791466	0.107698	-7.34893	1.99802e-13	9.03735e-12	TNFSF15	lower in PUCAIsevere
4159.73	-0.791119	0.117641	-6.72486	1.75762e-11	4.64745e-10	TM4SF1	lower in PUCAIsevere
59.3469	-0.789675	0.154202	-5.12104	3.0385e-07	2.40803e-06	CEACAM4	lower in PUCAIsevere
353.389	-0.788579	0.154028	-5.11971	3.06008e-07	2.41968e-06	LYPD5	lower in PUCAIsevere
3337.91	-0.787818	0.213381	-3.69208	0.000222431	0.000812078	CYR61	lower in PUCAIsevere
249.642	-0.786835	0.108337	-7.26285	3.79017e-13	1.5963e-11	PRR16	lower in PUCAIsevere
134.323	-0.786561	0.123893	-6.34871	2.1713e-10	4.17262e-09	ETV4	lower in PUCAIsevere
25866.5	-0.78638	0.135771	-5.79194	6.95778e-09	8.83349e-08	COL1A1	lower in PUCAIsevere
44.7516	-0.786297	0.131311	-5.98806	2.12353e-09	3.12139e-08	PERM1	lower in PUCAIsevere
3068.36	-0.784987	0.098868	-7.93975	2.02597e-15	1.62853e-13	CTSL	lower in PUCAIsevere
9.921	-0.783814	0.16602	-4.72121	2.34445e-06	1.47098e-05	CARD17	lower in PUCAIsevere
277.208	-0.783465	0.101286	-7.73516	1.03271e-14	6.60321e-13	SNCAIP	lower in PUCAIsevere
754.85	-0.781109	0.124281	-6.28501	3.27842e-10	5.98152e-09	MMP19	lower in PUCAIsevere
5044	-0.780807	0.104848	-7.44703	9.54643e-14	4.58326e-12	F3	lower in PUCAIsevere
100.512	-0.777613	0.200289	-3.88245	0.000103408	0.000414662	FST	lower in PUCAIsevere
2991.8	-0.774675	0.105631	-7.33381	2.23699e-13	9.98975e-12	ST3GAL1	lower in PUCAIsevere
181.474	-0.774419	0.214615	-3.60841	0.000308085	0.00108156	CYP26B1	lower in PUCAIsevere
1021.91	-0.770809	0.108306	-7.11693	1.10354e-12	4.09592e-11	DLC1	lower in PUCAIsevere
1015.71	-0.768272	0.118983	-6.45696	1.06826e-10	2.21641e-09	THBD	lower in PUCAIsevere
3479.35	-0.768077	0.116718	-6.5806	4.68567e-11	1.07878e-09	PLAUR	lower in PUCAIsevere
205.504	-0.767858	0.180477	-4.25461	2.09418e-05	0.000101359	HBA1	lower in PUCAIsevere
56.7378	-0.767139	0.290522	-2.64055	0.00827716	0.0192709	DNAAF1	lower in PUCAIsevere
1078.71	-0.765686	0.0889455	-8.60849	7.40304e-18	1.25468e-15	IGSF6	lower in PUCAIsevere
8779.01	-0.765551	0.142884	-5.35785	8.42182e-08	7.90852e-07	TIMP1	lower in PUCAIsevere
2240.19	-0.764709	0.109313	-6.99557	2.64187e-12	8.84838e-11	GJA1	lower in PUCAIsevere
177.7	-0.762326	0.106563	-7.15379	8.44141e-13	3.2533e-11	NLRC4	lower in PUCAIsevere
1484.68	-0.75919	0.134133	-5.65997	1.51399e-08	1.7425e-07	PDE4B	lower in PUCAIsevere
103.489	-0.755675	0.112789	-6.69988	2.08587e-11	5.34461e-10	FNDC4	lower in PUCAIsevere
1752.99	-0.755213	0.102354	-7.37846	1.60137e-13	7.31378e-12	FAM20C	lower in PUCAIsevere
3045.87	-0.754191	0.103562	-7.28252	3.27642e-13	1.43135e-11	PMEPA1	lower in PUCAIsevere
123.785	-0.753424	0.0925837	-8.13776	4.02658e-16	3.85319e-14	LHX6	lower in PUCAIsevere
2425.94	-0.753305	0.098745	-7.62879	2.36959e-14	1.38311e-12	MCAM	lower in PUCAIsevere
1811.56	-0.749763	0.105193	-7.12753	1.02185e-12	3.81283e-11	FCER1G	lower in PUCAIsevere
90.5986	-0.749376	0.147655	-5.07517	3.87153e-07	2.98907e-06	ART3	lower in PUCAIsevere
670.451	-0.748504	0.138519	-5.40361	6.5313e-08	6.35153e-07	SHH	lower in PUCAIsevere
411.168	-0.748274	0.132535	-5.64585	1.64364e-08	1.86912e-07	FAM20A	lower in PUCAIsevere
94.8617	-0.746794	0.194766	-3.83432	0.000125911	0.000491384	KLK12	lower in PUCAIsevere
698.469	-0.745946	0.320001	-2.33107	0.0197496	0.040532	ALDOB	lower in PUCAIsevere
315.15	-0.745337	0.120513	-6.18471	6.22164e-10	1.04564e-08	GLIS3	lower in PUCAIsevere
726.785	-0.744422	0.120088	-6.19898	5.68317e-10	9.66689e-09	PLEKHS1	lower in PUCAIsevere
3277.12	-0.7439	0.12007	-6.19556	5.80782e-10	9.83135e-09	COL15A1	lower in PUCAIsevere
299.397	-0.743369	0.105805	-7.02584	2.12778e-12	7.3723e-11	STX11	lower in PUCAIsevere
721.479	-0.742042	0.097011	-7.64905	2.02471e-14	1.19114e-12	TMTC1	lower in PUCAIsevere
87.139	-0.741762	0.170206	-4.35802	1.31243e-05	6.67945e-05	APOBEC1	lower in PUCAIsevere
452.586	-0.741166	0.132559	-5.59121	2.25497e-08	2.47818e-07	AHNAK2	lower in PUCAIsevere
922.904	-0.740491	0.130869	-5.65825	1.52924e-08	1.7532e-07	HAPLN3	lower in PUCAIsevere
123.616	-0.738081	0.192235	-3.83947	0.000123301	0.000483409	IL23A	lower in PUCAIsevere
7407.01	-0.737087	0.137294	-5.36867	7.93194e-08	7.52892e-07	PDZK1IP1	lower in PUCAIsevere
403.734	-0.73488	0.0902305	-8.14447	3.80942e-16	3.67035e-14	IL1RAP	lower in PUCAIsevere
108.885	-0.733755	0.0962037	-7.62709	2.40107e-14	1.3957e-12	AMPH	lower in PUCAIsevere
38.6797	-0.732111	0.16291	-4.49397	6.99079e-06	3.85399e-05	S100A2	lower in PUCAIsevere
517.11	-0.731699	0.160978	-4.54534	5.48458e-06	3.13115e-05	GNLY	lower in PUCAIsevere
543.911	-0.730433	0.0977375	-7.47341	7.81406e-14	3.82998e-12	MTCL1	lower in PUCAIsevere
162.061	-0.729043	0.115337	-6.32098	2.5991e-10	4.90759e-09	CDH6	lower in PUCAIsevere
433.434	-0.728928	0.139006	-5.24387	1.5724e-07	1.35699e-06	CST7	lower in PUCAIsevere
265.811	-0.728026	0.17999	-4.04481	5.23656e-05	0.000230484	SIGLEC14	lower in PUCAIsevere
106.502	-0.727647	0.205754	-3.53649	0.000405481	0.00138075	IL17A	lower in PUCAIsevere
178	-0.726056	0.124987	-5.80903	6.28347e-09	8.10913e-08	RGL4	lower in PUCAIsevere
2660.85	-0.725645	0.117719	-6.16423	7.0825e-10	1.17488e-08	ITGAX	lower in PUCAIsevere
17446.4	-0.725548	0.100785	-7.19895	6.0679e-13	2.43877e-11	SPARC	lower in PUCAIsevere
9063.08	-0.724745	0.0957981	-7.56534	3.86847e-14	2.10922e-12	FSTL1	lower in PUCAIsevere
83.0736	-0.723893	0.126874	-5.70562	1.15921e-08	1.37376e-07	TFAP2C	lower in PUCAIsevere
665.5	-0.72235	0.0907083	-7.96344	1.67323e-15	1.36845e-13	ADAMTS14	lower in PUCAIsevere
6945.03	-0.722208	0.107829	-6.69772	2.117e-11	5.38514e-10	COL18A1	lower in PUCAIsevere
5410.09	-0.719269	0.117259	-6.13404	8.56746e-10	1.39651e-08	SRGN	lower in PUCAIsevere
419.473	-0.71893	0.115713	-6.21304	5.19681e-10	8.93263e-09	PTGFR	lower in PUCAIsevere
101.064	-0.718658	0.151945	-4.72971	2.24843e-06	1.41832e-05	INHBB	lower in PUCAIsevere
57.7992	-0.717227	0.134145	-5.34667	8.95887e-08	8.32628e-07	TPRG1	lower in PUCAIsevere
41.0314	-0.716871	0.12681	-5.65309	1.5759e-08	1.80082e-07	GPR20	lower in PUCAIsevere
1276.44	-0.716148	0.142361	-5.03052	4.89145e-07	3.6776e-06	PCSK9	lower in PUCAIsevere
3007.67	-0.715521	0.102979	-6.94825	3.69854e-12	1.19056e-10	CD93	lower in PUCAIsevere
1329.77	-0.712869	0.0903487	-7.8902	3.01695e-15	2.29402e-13	PTAFR	lower in PUCAIsevere
2193.61	-0.712845	0.118168	-6.03245	1.61493e-09	2.46658e-08	CEBPB	lower in PUCAIsevere
1236.16	-0.712024	0.102217	-6.96578	3.26581e-12	1.07086e-10	IRAK3	lower in PUCAIsevere
338.123	-0.709084	0.124261	-5.7064	1.1539e-08	1.36863e-07	TGFB3	lower in PUCAIsevere
455.607	-0.708669	0.123751	-5.72658	1.02477e-08	1.23209e-07	SLC28A3	lower in PUCAIsevere
133.552	-0.707855	0.140476	-5.03898	4.68011e-07	3.53762e-06	ZNF385D	lower in PUCAIsevere
1117.28	-0.707251	0.115922	-6.10108	1.05353e-09	1.69173e-08	KDR	lower in PUCAIsevere
4491.47	-0.7069	0.125915	-5.61409	1.97598e-08	2.20377e-07	VWF	lower in PUCAIsevere
300.894	-0.706434	0.113725	-6.21179	5.23838e-10	8.97544e-09	BCL6B	lower in PUCAIsevere
540.513	-0.706351	0.138419	-5.10298	3.3434e-07	2.61869e-06	S1PR3	lower in PUCAIsevere
506.808	-0.705889	0.109472	-6.44814	1.13232e-10	2.32191e-09	EDNRA	lower in PUCAIsevere
206.608	-0.704536	0.116699	-6.03723	1.56779e-09	2.4035e-08	PTGIR	lower in PUCAIsevere
106.892	-0.704167	0.135288	-5.20493	1.94067e-07	1.62787e-06	HSD11B1	lower in PUCAIsevere
10682.8	-0.70414	0.0856294	-8.2231	1.98303e-16	2.06631e-14	HIF1A	lower in PUCAIsevere
2000.15	-0.701252	0.129779	-5.40343	6.53801e-08	6.35153e-07	GBP5	lower in PUCAIsevere
682.4	-0.700235	0.108529	-6.45205	1.10345e-10	2.27266e-09	CDC42EP2	lower in PUCAIsevere
521.015	-0.699766	0.158381	-4.41824	9.95066e-06	5.23862e-05	MASP1	lower in PUCAIsevere
2877.53	-0.699755	0.197637	-3.5406	0.000399219	0.00136108	CXCL9	lower in PUCAIsevere
766.571	-0.69945	0.0937859	-7.45794	8.78843e-14	4.24834e-12	NRP2	lower in PUCAIsevere
1045.6	-0.699296	0.117582	-5.94729	2.72618e-09	3.83876e-08	TMEM132A	lower in PUCAIsevere
765.062	-0.697902	0.0904072	-7.71954	1.16746e-14	7.36445e-13	KIFC3	lower in PUCAIsevere
1602.42	-0.697391	0.112038	-6.22461	4.82756e-10	8.44536e-09	ALOX5	lower in PUCAIsevere
1483.14	-0.695687	0.115432	-6.02682	1.67217e-09	2.53747e-08	SRD5A3	lower in PUCAIsevere
20.9666	-0.69457	0.190164	-3.65247	0.000259727	0.000931323	CCL7	lower in PUCAIsevere
653.694	-0.693738	0.124317	-5.58041	2.39952e-08	2.61862e-07	UNC5CL	lower in PUCAIsevere
6206.02	-0.692552	0.220378	-3.14256	0.00167475	0.00482266	SPINK4	lower in PUCAIsevere
638.442	-0.692166	0.104701	-6.6109	3.82003e-11	9.09244e-10	VASN	lower in PUCAIsevere
3052.86	-0.692163	0.089944	-7.69548	1.4096e-14	8.69689e-13	VCAN	lower in PUCAIsevere
1693.12	-0.692146	0.141771	-4.88214	1.04939e-06	7.3114e-06	FCGR3A	lower in PUCAIsevere
19.3455	-0.691778	0.25282	-2.73625	0.00621445	0.0150878	FAM25C	lower in PUCAIsevere
1857.37	-0.689139	0.115743	-5.95403	2.61615e-09	3.70609e-08	CD163	lower in PUCAIsevere
529.086	-0.68884	0.131207	-5.25004	1.52065e-07	1.32043e-06	TTC9	lower in PUCAIsevere
1331.62	-0.688405	0.102811	-6.69582	2.14461e-11	5.43895e-10	FLT1	lower in PUCAIsevere
8038.8	-0.688174	0.0964324	-7.13634	9.58506e-13	3.61483e-11	TGFBI	lower in PUCAIsevere
589.525	-0.686321	0.0812975	-8.44209	3.1172e-17	4.21632e-15	GPX8	lower in PUCAIsevere
644.106	-0.684602	0.0988002	-6.92915	4.23374e-12	1.35355e-10	ROBO4	lower in PUCAIsevere
214.567	-0.683094	0.0976978	-6.9919	2.7118e-12	9.03956e-11	BTBD19	lower in PUCAIsevere
102.012	-0.68261	0.136235	-5.01052	5.42822e-07	4.04871e-06	ENPEP	lower in PUCAIsevere
313.043	-0.682109	0.224533	-3.03791	0.00238227	0.00656186	IL24	lower in PUCAIsevere
1328.58	-0.681622	0.100736	-6.76646	1.31976e-11	3.66174e-10	ZBP1	lower in PUCAIsevere
281.399	-0.68141	0.104005	-6.55169	5.68901e-11	1.27765e-09	CLEC4A	lower in PUCAIsevere
535.663	-0.681409	0.118172	-5.76627	8.10439e-09	1.008e-07	SMOX	lower in PUCAIsevere
226.552	-0.681305	0.143972	-4.7322	2.22103e-06	1.40545e-05	SLC1A3	lower in PUCAIsevere
307.215	-0.680951	0.100001	-6.80944	9.79787e-12	2.81854e-10	LDLRAD3	lower in PUCAIsevere
237.985	-0.680433	0.178696	-3.80777	0.000140228	0.000538517	TENM4	lower in PUCAIsevere
1393.94	-0.680203	0.100657	-6.75765	1.40244e-11	3.83817e-10	PLA2G7	lower in PUCAIsevere
278.411	-0.679802	0.107339	-6.3332	2.40129e-10	4.56699e-09	TDRD6	lower in PUCAIsevere
2241.72	-0.679231	0.10825	-6.27464	3.5044e-10	6.35262e-09	F2R	lower in PUCAIsevere
77.0113	-0.677478	0.111046	-6.1009	1.0547e-09	1.69173e-08	SLC35G2	lower in PUCAIsevere
513.855	-0.677272	0.104377	-6.4887	8.65799e-11	1.85094e-09	CSPG4	lower in PUCAIsevere
119.443	-0.676849	0.134493	-5.03261	4.83841e-07	3.65139e-06	TGFB2	lower in PUCAIsevere
265.659	-0.675455	0.116038	-5.821	5.84981e-09	7.59827e-08	PGF	lower in PUCAIsevere
3511.49	-0.674707	0.113225	-5.95899	2.53807e-09	3.62467e-08	ERRFI1	lower in PUCAIsevere
49.0963	-0.674272	0.151597	-4.44779	8.67577e-06	4.65099e-05	LEXM	lower in PUCAIsevere
129.351	-0.673989	0.148561	-4.53679	5.71172e-06	3.24109e-05	LIN7A	lower in PUCAIsevere
785.379	-0.673332	0.170521	-3.94868	7.85842e-05	0.000328025	PRRX1	lower in PUCAIsevere
65.8603	-0.672105	0.118533	-5.67017	1.42652e-08	1.65431e-07	GPR27	lower in PUCAIsevere
85.8819	-0.670792	0.121685	-5.51252	3.53723e-08	3.68852e-07	EVA1A	lower in PUCAIsevere
648.686	-0.670698	0.133531	-5.02279	5.09272e-07	3.81669e-06	AGPAT4	lower in PUCAIsevere
514.148	-0.670662	0.116474	-5.75806	8.50846e-09	1.04953e-07	OLFML2B	lower in PUCAIsevere
556.072	-0.670634	0.234851	-2.85557	0.00429594	0.0109595	ABCA12	lower in PUCAIsevere
697.506	-0.670395	0.0889814	-7.5341	4.91712e-14	2.57134e-12	C3AR1	lower in PUCAIsevere
717.308	-0.670293	0.109081	-6.14491	8.00075e-10	1.3102e-08	CALCRL	lower in PUCAIsevere
959.222	-0.669717	0.159531	-4.19802	2.69256e-05	0.000127016	CR1	lower in PUCAIsevere
922.799	-0.668872	0.139505	-4.7946	1.63002e-06	1.06848e-05	SOCS1	lower in PUCAIsevere
1225.69	-0.668531	0.0805552	-8.29904	1.04958e-16	1.2102e-14	RNF24	lower in PUCAIsevere
3364.64	-0.66826	0.147462	-4.53175	5.8498e-06	3.29949e-05	IFITM2	lower in PUCAIsevere
69.0505	-0.666996	0.160043	-4.1676	3.07823e-05	0.00014343	GALNT14	lower in PUCAIsevere
82.1644	-0.666007	0.194216	-3.4292	0.000605362	0.00196213	AL365273.1	lower in PUCAIsevere
539.192	-0.664507	0.0860692	-7.72061	1.15776e-14	7.33615e-13	LMCD1	lower in PUCAIsevere
615.586	-0.664293	0.13875	-4.78768	1.68721e-06	1.10135e-05	KCNN3	lower in PUCAIsevere
33393.2	-0.663343	0.0776027	-8.54793	1.25313e-17	1.93712e-15	CTSB	lower in PUCAIsevere
265.377	-0.662725	0.155295	-4.26751	1.9767e-05	9.6382e-05	RSPO3	lower in PUCAIsevere
48.9898	-0.661674	0.274356	-2.41174	0.0158766	0.033635	MTRNR2L1	lower in PUCAIsevere
2286.35	-0.660337	0.099984	-6.60443	3.99061e-11	9.4058e-10	LCP2	lower in PUCAIsevere
130.061	-0.660336	0.12301	-5.36814	7.95524e-08	7.54594e-07	DNAH17	lower in PUCAIsevere
273.092	-0.659425	0.107941	-6.10912	1.0018e-09	1.61609e-08	TSPAN2	lower in PUCAIsevere
4079.25	-0.65881	0.0829328	-7.94391	1.95905e-15	1.58379e-13	IL1R1	lower in PUCAIsevere
820.902	-0.658202	0.0898926	-7.32209	2.44134e-13	1.08678e-11	SLCO4A1	lower in PUCAIsevere
53.6409	-0.657042	0.112364	-5.84743	4.99225e-09	6.60019e-08	GPR141	lower in PUCAIsevere
299.609	-0.656727	0.0992966	-6.61379	3.74615e-11	8.93171e-10	RASSF8	lower in PUCAIsevere
4698.31	-0.6567	0.105662	-6.2151	5.12923e-10	8.8549e-09	NID1	lower in PUCAIsevere
1014.99	-0.656281	0.114845	-5.71451	1.10024e-08	1.31496e-07	ADGRF5	lower in PUCAIsevere
665.918	-0.656151	0.193515	-3.3907	0.000697152	0.00222226	EGR3	lower in PUCAIsevere
5912.09	-0.6561	0.114626	-5.72382	1.04152e-08	1.25009e-07	COL5A1	lower in PUCAIsevere
2590.52	-0.655642	0.150682	-4.35117	1.3541e-05	6.8642e-05	C8orf4	lower in PUCAIsevere
3771.98	-0.654689	0.133204	-4.91493	8.88154e-07	6.25935e-06	BGN	lower in PUCAIsevere
716.083	-0.653437	0.122011	-5.35556	8.52925e-08	7.97746e-07	LRRK2	lower in PUCAIsevere
247.435	-0.653281	0.12779	-5.11216	3.18496e-07	2.50575e-06	GJA4	lower in PUCAIsevere
1260.36	-0.652657	0.118047	-5.52881	3.22405e-08	3.42027e-07	CHST2	lower in PUCAIsevere
46179.4	-0.652149	0.11579	-5.63217	1.77952e-08	2.00421e-07	COL3A1	lower in PUCAIsevere
1195.66	-0.65133	0.0912136	-7.14071	9.28485e-13	3.5299e-11	TLR4	lower in PUCAIsevere
877.051	-0.65109	0.101263	-6.42972	1.27842e-10	2.59877e-09	ACKR3	lower in PUCAIsevere
1180.87	-0.650126	0.136176	-4.77417	1.80448e-06	1.17e-05	TAGAP	lower in PUCAIsevere
2045.65	-0.650069	0.109178	-5.95419	2.61356e-09	3.70609e-08	LIPG	lower in PUCAIsevere
336.261	-0.649924	0.168754	-3.85131	0.000117489	0.000462816	F2RL2	lower in PUCAIsevere
1950.89	-0.649148	0.0830063	-7.82047	5.26251e-15	3.66474e-13	GK	lower in PUCAIsevere
1778.32	-0.648638	0.0737453	-8.79565	1.42224e-18	2.94216e-16	P4HA1	lower in PUCAIsevere
624.16	-0.647884	0.14181	-4.56868	4.90807e-06	2.83423e-05	GUCY1A3	lower in PUCAIsevere
725.061	-0.647294	0.143968	-4.4961	6.92116e-06	3.82254e-05	MMRN1	lower in PUCAIsevere
1139.73	-0.646851	0.0920017	-7.03086	2.05268e-12	7.14729e-11	KSR1	lower in PUCAIsevere
2198.71	-0.646025	0.129328	-4.99523	5.8765e-07	4.33708e-06	NOTCH3	lower in PUCAIsevere
6177.41	-0.645309	0.0819189	-7.87742	3.34222e-15	2.5008e-13	SBNO2	lower in PUCAIsevere
439.412	-0.645195	0.109306	-5.90266	3.57681e-09	4.90399e-08	NOS3	lower in PUCAIsevere
121.782	-0.64468	0.217814	-2.95978	0.00307862	0.00821763	CCL8	lower in PUCAIsevere
91384.7	-0.644592	0.178059	-3.62009	0.000294497	0.0010402	OLFM4	lower in PUCAIsevere
1556.37	-0.64418	0.107184	-6.01001	1.85514e-09	2.75859e-08	SERPINE2	lower in PUCAIsevere
29.822	-0.643872	0.279404	-2.30445	0.0211976	0.0430719	IL22	lower in PUCAIsevere
1754.97	-0.643676	0.113601	-5.66611	1.46078e-08	1.6871e-07	BATF2	lower in PUCAIsevere
251.38	-0.642866	0.156476	-4.10839	3.9842e-05	0.000180502	ADAM12	lower in PUCAIsevere
777.508	-0.641729	0.150146	-4.27402	1.91976e-05	9.38658e-05	GEM	lower in PUCAIsevere
645.001	-0.640995	0.0764617	-8.38322	5.15e-17	6.52658e-15	IKBIP	lower in PUCAIsevere
2084.51	-0.640393	0.097812	-6.54719	5.86308e-11	1.31122e-09	CDH11	lower in PUCAIsevere
639.359	-0.640044	0.0945094	-6.77228	1.26773e-11	3.53131e-10	ADGRL4	lower in PUCAIsevere
7346.6	-0.63937	0.109585	-5.83446	5.39645e-09	7.08312e-08	PIM2	lower in PUCAIsevere
169.397	-0.638995	0.0971303	-6.57874	4.74444e-11	1.08697e-09	DUSP14	lower in PUCAIsevere
115.321	-0.638021	0.125544	-5.08203	3.73414e-07	2.89508e-06	LPAR3	lower in PUCAIsevere
258.15	-0.636652	0.0935795	-6.80333	1.0223e-11	2.91699e-10	NDUFA4L2	lower in PUCAIsevere
141.735	-0.636601	0.150487	-4.23028	2.33397e-05	0.000111597	CLEC12A	lower in PUCAIsevere
283.089	-0.636584	0.112795	-5.64372	1.66414e-08	1.88939e-07	BHLHA15	lower in PUCAIsevere
863.837	-0.636461	0.122984	-5.17515	2.27723e-07	1.86243e-06	LAX1	lower in PUCAIsevere
2346.92	-0.635264	0.104803	-6.06153	1.34832e-09	2.08885e-08	SPNS2	lower in PUCAIsevere
578.315	-0.634861	0.122648	-5.17627	2.26368e-07	1.85458e-06	SOX18	lower in PUCAIsevere
153.25	-0.634406	0.162055	-3.91476	9.04959e-05	0.000369094	TACSTD2	lower in PUCAIsevere
414.42	-0.634141	0.0951507	-6.6646	2.65386e-11	6.56096e-10	ITGB3	lower in PUCAIsevere
1094.34	-0.631863	0.108464	-5.82557	5.69176e-09	7.41351e-08	LILRB1	lower in PUCAIsevere
22.7756	-0.631584	0.183253	-3.44652	0.000567859	0.00185856	RNASE2	lower in PUCAIsevere
214.62	-0.630563	0.277978	-2.26839	0.0233055	0.046674	HIST2H2AA3	lower in PUCAIsevere
145.014	-0.630484	0.117942	-5.34573	9.00551e-08	8.36175e-07	BATF3	lower in PUCAIsevere
118.151	-0.630009	0.0917134	-6.86933	6.45057e-12	1.95561e-10	DYRK3	lower in PUCAIsevere
3270.38	-0.629212	0.123486	-5.09539	3.48016e-07	2.71522e-06	IL7R	lower in PUCAIsevere
2967.52	-0.628535	0.0856814	-7.33572	2.20533e-13	9.87973e-12	RRM2	lower in PUCAIsevere
308.25	-0.628498	0.102679	-6.12102	9.2976e-10	1.51027e-08	ECSCR	lower in PUCAIsevere
2112.6	-0.625621	0.11125	-5.62356	1.87063e-08	2.09674e-07	CCDC71L	lower in PUCAIsevere
2766.46	-0.624902	0.118574	-5.27017	1.36301e-07	1.20285e-06	THY1	lower in PUCAIsevere
2497.8	-0.624837	0.0991606	-6.30127	2.95219e-10	5.44992e-09	FBN1	lower in PUCAIsevere
137.061	-0.62342	0.100358	-6.21197	5.23239e-10	8.97544e-09	HOMER1	lower in PUCAIsevere
103.719	-0.622072	0.107303	-5.79731	6.73852e-09	8.59391e-08	HIST1H2BC	lower in PUCAIsevere
146.194	-0.621817	0.155702	-3.99364	6.50678e-05	0.000277956	TRIM7	lower in PUCAIsevere
57.966	-0.621293	0.17264	-3.59878	0.000319712	0.00111868	IL5RA	lower in PUCAIsevere
386.508	-0.620711	0.104979	-5.91272	3.36512e-09	4.63182e-08	PDLIM4	lower in PUCAIsevere
64.8578	-0.620197	0.14056	-4.41232	1.02267e-05	5.36589e-05	VNN3	lower in PUCAIsevere
1145.66	-0.617439	0.077254	-7.99233	1.32414e-15	1.14979e-13	DSE	lower in PUCAIsevere
1152.28	-0.616993	0.118586	-5.20293	1.96173e-07	1.64358e-06	LILRB4	lower in PUCAIsevere
93.177	-0.615852	0.10235	-6.01714	1.77526e-09	2.67087e-08	RAB38	lower in PUCAIsevere
92.7663	-0.61486	0.24463	-2.51343	0.0119564	0.026416	HS3ST2	lower in PUCAIsevere
115.151	-0.614205	0.130435	-4.70891	2.49042e-06	1.55417e-05	SUSD2	lower in PUCAIsevere
451.296	-0.613771	0.126649	-4.84623	1.25827e-06	8.56733e-06	BCAT1	lower in PUCAIsevere
92.0009	-0.612825	0.171905	-3.5649	0.000363988	0.00125465	TFF2	lower in PUCAIsevere
1577.05	-0.612461	0.090236	-6.78732	1.14235e-11	3.22131e-10	KIRREL	lower in PUCAIsevere
19737.3	-0.612381	0.168189	-3.64104	0.000271542	0.000968261	PI3	lower in PUCAIsevere
71.6809	-0.61196	0.160008	-3.82455	0.000131011	0.000507277	IGF2BP3	lower in PUCAIsevere
1318.49	-0.611583	0.0782431	-7.81645	5.43338e-15	3.72836e-13	TFPI	lower in PUCAIsevere
278.051	-0.610873	0.112515	-5.42927	5.65841e-08	5.60457e-07	GJC1	lower in PUCAIsevere
4046.02	-0.610871	0.136532	-4.47418	7.67035e-06	4.17775e-05	STS	lower in PUCAIsevere
427.019	-0.610531	0.126511	-4.82592	1.39355e-06	9.33927e-06	GPR176	lower in PUCAIsevere
1149.1	-0.608921	0.128899	-4.72403	2.31214e-06	1.45341e-05	IFIT3	lower in PUCAIsevere
375.408	-0.608377	0.117205	-5.1907	2.09505e-07	1.73563e-06	FGF2	lower in PUCAIsevere
2323.47	-0.607405	0.0829672	-7.32102	2.46095e-13	1.09206e-11	PLXNA1	lower in PUCAIsevere
508.56	-0.606327	0.154218	-3.93163	8.43721e-05	0.000348294	VSIG4	lower in PUCAIsevere
1754.36	-0.606188	0.0953157	-6.35979	2.02035e-10	3.88958e-09	CHST15	lower in PUCAIsevere
555.762	-0.605063	0.101244	-5.97627	2.28311e-09	3.32125e-08	MRGPRF	lower in PUCAIsevere
78.0286	-0.604723	0.164807	-3.66928	0.000243231	0.000877316	VMO1	lower in PUCAIsevere
666.495	-0.602941	0.14724	-4.09496	4.2224e-05	0.000190069	CPXM1	lower in PUCAIsevere
1245.06	-0.602896	0.0910082	-6.62463	3.48123e-11	8.34249e-10	RAI14	lower in PUCAIsevere
166.12	-0.602724	0.133537	-4.51352	6.37591e-06	3.55676e-05	CBR3	lower in PUCAIsevere
775.125	-0.602475	0.0917431	-6.56698	5.13458e-11	1.16874e-09	CD300A	lower in PUCAIsevere
103.751	-0.601284	0.108645	-5.53441	3.12278e-08	3.32285e-07	PRRX2	lower in PUCAIsevere
103.646	-0.600302	0.0942746	-6.36759	1.92027e-10	3.72585e-09	C17orf107	lower in PUCAIsevere
452.086	-0.600069	0.103241	-5.81234	6.16057e-09	7.97872e-08	PDGFB	lower in PUCAIsevere
347.951	-0.599393	0.096896	-6.18594	6.1734e-10	1.04001e-08	P2RY6	lower in PUCAIsevere
918.045	-0.599216	0.0741817	-8.07768	6.60096e-16	5.95229e-14	GPT2	lower in PUCAIsevere
136.202	-0.597257	0.14992	-3.98384	6.78114e-05	0.000288537	HSPB7	lower in PUCAIsevere
1152.73	-0.596538	0.0991616	-6.01582	1.7898e-09	2.68699e-08	SPRY4	lower in PUCAIsevere
114.863	-0.59599	0.135774	-4.38958	1.13571e-05	5.89738e-05	ADGRE3	lower in PUCAIsevere
363.161	-0.595171	0.138773	-4.28881	1.7963e-05	8.85376e-05	SP6	lower in PUCAIsevere
813.233	-0.594837	0.0957285	-6.21379	5.17229e-10	8.91649e-09	ARHGAP23	lower in PUCAIsevere
166.215	-0.594494	0.0978979	-6.07259	1.25863e-09	1.96505e-08	UBTD1	lower in PUCAIsevere
99.7907	-0.593494	0.103124	-5.75515	8.65645e-09	1.06629e-07	CD300C	lower in PUCAIsevere
18.4897	-0.59112	0.149777	-3.94666	7.92492e-05	0.000330213	TSPO2	lower in PUCAIsevere
3625.7	-0.591003	0.102641	-5.75797	8.51292e-09	1.04953e-07	ITGA1	lower in PUCAIsevere
346.651	-0.590415	0.118028	-5.00232	5.66433e-07	4.19379e-06	CACNA1C	lower in PUCAIsevere
135.242	-0.590336	0.121434	-4.86139	1.16565e-06	8.01819e-06	SLC16A4	lower in PUCAIsevere
177.315	-0.589989	0.124098	-4.75422	1.99218e-06	1.27905e-05	TMEM71	lower in PUCAIsevere
155.679	-0.589575	0.0738906	-7.97903	1.47485e-15	1.24232e-13	ZMYND15	lower in PUCAIsevere
4898.93	-0.58765	0.114492	-5.13269	2.85625e-07	2.28639e-06	NCOA7	lower in PUCAIsevere
1166.89	-0.587622	0.0850684	-6.90764	4.92766e-12	1.54726e-10	GCA	lower in PUCAIsevere
418.704	-0.587257	0.104653	-5.61148	2.00601e-08	2.23424e-07	CSGALNACT1	lower in PUCAIsevere
8371.82	-0.585659	0.160061	-3.65898	0.000253224	0.000910325	XDH	lower in PUCAIsevere
1416.72	-0.585612	0.154989	-3.7784	0.000157838	0.000598248	CCL2	lower in PUCAIsevere
2421.15	-0.585198	0.0941867	-6.21317	5.19264e-10	8.93263e-09	FILIP1L	lower in PUCAIsevere
2707.61	0.585093	0.120561	4.85308	1.21561e-06	8.31308e-06	RNASE1	higher in PUCAI severe
587.416	0.585602	0.118721	4.93259	8.11467e-07	5.77385e-06	PER3	higher in PUCAI severe
2211.96	0.587136	0.0982308	5.9771	2.27143e-09	3.31111e-08	MXI1	higher in PUCAI severe
494.963	0.588307	0.145231	4.05084	5.10334e-05	0.000225114	SLC51B	higher in PUCAI severe
1896.44	0.588343	0.0836234	7.03563	1.98362e-12	6.9412e-11	HOXB9	higher in PUCAI severe
172.025	0.589696	0.0966678	6.10023	1.05916e-09	1.69501e-08	CDKL1	higher in PUCAI severe
364.063	0.590326	0.146055	4.0418	5.30429e-05	0.000233173	CTD-2369P2.12	higher in PUCAI severe
301.313	0.590847	0.133129	4.43814	9.074e-06	4.83866e-05	ACVR1C	higher in PUCAI severe
52.2486	0.591341	0.185813	3.18245	0.00146035	0.00427884	WBSCR27	higher in PUCAI severe
93.3912	0.591637	0.138731	4.26463	2.00236e-05	9.74983e-05	ENHO	higher in PUCAI severe
256.789	0.591676	0.113149	5.22919	1.70253e-07	1.45737e-06	NAT2	higher in PUCAI severe
1942.83	0.591743	0.0943771	6.26999	3.61081e-10	6.50362e-09	PLCE1	higher in PUCAI severe
738.208	0.592573	0.0924458	6.40995	1.45572e-10	2.92537e-09	HNF1B	higher in PUCAI severe
159.034	0.592788	0.0958025	6.18761	6.10849e-10	1.03031e-08	DPF3	higher in PUCAI severe
318.044	0.593526	0.0997664	5.94916	2.69524e-09	3.799e-08	SLC35G1	higher in PUCAI severe
105.523	0.593567	0.107863	5.50296	3.73463e-08	3.87142e-07	CYS1	higher in PUCAI severe
250.611	0.594823	0.074321	8.00344	1.20995e-15	1.05716e-13	C7orf31	higher in PUCAI severe
954.928	0.595487	0.0664647	8.95945	3.26301e-19	7.65013e-17	PGAP3	higher in PUCAI severe
326.108	0.596803	0.113284	5.26818	1.37784e-07	1.21442e-06	RASD1	higher in PUCAI severe
264.02	0.597059	0.113999	5.23739	1.62861e-07	1.40206e-06	SLC6A7	higher in PUCAI severe
294.544	0.597143	0.116707	5.11662	3.11063e-07	2.45552e-06	CHST6	higher in PUCAI severe
317.535	0.597169	0.110239	5.41703	6.05963e-08	5.95258e-07	MACROD1	higher in PUCAI severe
2080.45	0.598744	0.112587	5.31808	1.0487e-07	9.48682e-07	CLDN23	higher in PUCAI severe
37.5964	0.599069	0.222713	2.68987	0.00714795	0.016959	CRIP3	higher in PUCAI severe
887.725	0.599291	0.148981	4.0226	5.75596e-05	0.000249136	SLC37A2	higher in PUCAI severe
2062.88	0.599447	0.0889904	6.73609	1.6271e-11	4.3407e-10	BDH1	higher in PUCAI severe
1763.17	0.600037	0.092808	6.46535	1.01062e-10	2.10614e-09	TMCC3	higher in PUCAI severe
9999.02	0.60011	0.0894211	6.71106	1.93215e-11	5.04029e-10	KLF5	higher in PUCAI severe
711.914	0.601798	0.100827	5.96861	2.3928e-09	3.44872e-08	FGFR2	higher in PUCAI severe
276.162	0.602592	0.0795983	7.57041	3.72041e-14	2.04434e-12	RMDN2	higher in PUCAI severe
360.581	0.603849	0.105103	5.74533	9.17392e-09	1.12022e-07	ELL3	higher in PUCAI severe
400569	0.604043	0.0895079	6.74848	1.494e-11	4.02607e-10	MT-CO3	higher in PUCAI severe
110.951	0.605539	0.144672	4.18561	2.84403e-05	0.000133848	PRAC2	higher in PUCAI severe
4216.05	0.606429	0.138601	4.37535	1.21236e-05	6.25613e-05	NXPE1	higher in PUCAI severe
434.575	0.609363	0.0845375	7.2082	5.66958e-13	2.29838e-11	TRAPPC6A	higher in PUCAI severe
304.896	0.611669	0.195268	3.13246	0.00173346	0.00497037	HRASLS2	higher in PUCAI severe
110.482	0.613211	0.120035	5.10859	3.24566e-07	2.54923e-06	HIF3A	higher in PUCAI severe
257.872	0.613965	0.129781	4.73078	2.23663e-06	1.41215e-05	SCN9A	higher in PUCAI severe
176.116	0.614779	0.176488	3.4834	0.000495086	0.00164876	EYA2	higher in PUCAI severe
2597.06	0.615022	0.0977762	6.2901	3.17255e-10	5.81097e-09	CHCHD10	higher in PUCAI severe
46179.3	0.615575	0.13571	4.53597	5.73383e-06	3.24709e-05	CEACAM7	higher in PUCAI severe
8646.34	0.616669	0.115461	5.34095	9.24618e-08	8.54012e-07	CES2	higher in PUCAI severe
1082.06	0.616815	0.0891348	6.92002	4.51578e-12	1.43071e-10	THSD4	higher in PUCAI severe
3603.9	0.617233	0.0979383	6.30227	2.93322e-10	5.43632e-09	CAMK2N1	higher in PUCAI severe
759.065	0.620425	0.136818	4.53469	5.76893e-06	3.25973e-05	REP15	higher in PUCAI severe
14.308	0.621328	0.13904	4.46871	7.86924e-06	4.27235e-05	OMP	higher in PUCAI severe
1289.3	0.62183	0.132296	4.70028	2.59801e-06	1.61495e-05	PIGZ	higher in PUCAI severe
2799.16	0.621875	0.0901444	6.89865	5.24986e-12	1.63384e-10	SLC22A23	higher in PUCAI severe
301.224	0.622001	0.0952421	6.53074	6.54465e-11	1.44982e-09	RDH5	higher in PUCAI severe
329.289	0.622042	0.17511	3.5523	0.000381878	0.00130894	MT1F	higher in PUCAI severe
237.398	0.622659	0.0802369	7.76026	8.47577e-15	5.59759e-13	FAM161B	higher in PUCAI severe
3458.72	0.623562	0.108801	5.73121	9.97174e-09	1.20199e-07	WNK2	higher in PUCAI severe
2330.5	0.624062	0.0913446	6.83195	8.37681e-12	2.44474e-10	NRARP	higher in PUCAI severe
1771.65	0.625233	0.0985872	6.34193	2.26909e-10	4.33097e-09	NHSL1	higher in PUCAI severe
1216.33	0.626931	0.156843	3.99718	6.41004e-05	0.000274323	SULT1A1	higher in PUCAI severe
537.444	0.627475	0.157608	3.98123	6.85594e-05	0.000291367	DISP2	higher in PUCAI severe
2067.77	0.62799	0.112041	5.60501	2.08245e-08	2.31206e-07	FABP5	higher in PUCAI severe
4175.04	0.628036	0.106283	5.90907	3.44047e-09	4.7309e-08	TFCP2L1	higher in PUCAI severe
120.227	0.628064	0.134395	4.67328	2.96429e-06	1.81536e-05	HPGDS	higher in PUCAI severe
777.522	0.632485	0.109025	5.8013	6.58038e-09	8.41511e-08	C1orf226	higher in PUCAI severe
4452.43	0.634804	0.104891	6.05202	1.43044e-09	2.20878e-08	TST	higher in PUCAI severe
150.309	0.637694	0.123336	5.17037	2.33635e-07	1.90414e-06	BMX	higher in PUCAI severe
112.11	0.639059	0.145641	4.3879	1.14451e-05	5.93903e-05	TM4SF5	higher in PUCAI severe
1496.21	0.640355	0.111507	5.74272	9.3166e-09	1.13273e-07	C2orf72	higher in PUCAI severe
141.354	0.642258	0.195452	3.28601	0.00101617	0.00311297	TMPRSS6	higher in PUCAI severe
4677.42	0.642382	0.106861	6.01138	1.83946e-09	2.74107e-08	STARD10	higher in PUCAI severe
1867.16	0.643566	0.0859812	7.48496	7.15675e-14	3.54486e-12	RAVER2	higher in PUCAI severe
1626.82	0.644049	0.164048	3.92598	8.63783e-05	0.000354873	SPIB	higher in PUCAI severe
1103.73	0.645486	0.101767	6.34281	2.25614e-10	4.3121e-09	TMEM56	higher in PUCAI severe
103.956	0.647302	0.137843	4.69593	2.654e-06	1.64829e-05	FXYD1	higher in PUCAI severe
472.729	0.648168	0.101394	6.39257	1.63123e-10	3.24104e-09	PNPLA7	higher in PUCAI severe
270.363	0.649802	0.0860847	7.54841	4.40619e-14	2.35256e-12	CLYBL	higher in PUCAI severe
875.541	0.651012	0.08338	7.80777	5.82073e-15	3.97477e-13	C6orf136	higher in PUCAI severe
1060.69	0.651078	0.0962274	6.76603	1.32364e-11	3.66529e-10	PPARG	higher in PUCAI severe
771	0.651475	0.103087	6.31968	2.62114e-10	4.94256e-09	PKDCC	higher in PUCAI severe
240.546	0.654037	0.105076	6.22443	4.83295e-10	8.44536e-09	ADAMTSL1	higher in PUCAI severe
994.694	0.654152	0.101009	6.47618	9.40748e-11	1.98582e-09	AMACR	higher in PUCAI severe
16515.9	0.654448	0.124896	5.23992	1.60643e-07	1.38551e-06	FXYD3	higher in PUCAI severe
1191.14	0.654546	0.104367	6.27156	3.57454e-10	6.45482e-09	CYP2S1	higher in PUCAI severe
270.171	0.655579	0.091585	7.15815	8.1771e-13	3.16009e-11	OVOL2	higher in PUCAI severe
420.527	0.655709	0.246661	2.65834	0.00785274	0.0184046	FCER2	higher in PUCAI severe
896.169	0.656685	0.114928	5.7139	1.10418e-08	1.31855e-07	TMEM171	higher in PUCAI severe
540.827	0.657935	0.126349	5.20729	1.91615e-07	1.61501e-06	ESPN	higher in PUCAI severe
216.488	0.658963	0.104605	6.29953	2.98556e-10	5.48993e-09	SYP	higher in PUCAI severe
538.812	0.659531	0.108175	6.09687	1.08168e-09	1.72516e-08	PLA2G10	higher in PUCAI severe
204.85	0.662367	0.171716	3.85733	0.00011463	0.000453459	PLD4	higher in PUCAI severe
64.9124	0.662964	0.173154	3.82875	0.000128795	0.000500073	DEFB1	higher in PUCAI severe
1924.45	0.663939	0.126253	5.25878	1.45011e-07	1.26489e-06	SLC39A5	higher in PUCAI severe
3520.8	0.664626	0.0954705	6.96158	3.36467e-12	1.09562e-10	SEMA4G	higher in PUCAI severe
145.812	0.665511	0.0993619	6.69784	2.11517e-11	5.38514e-10	TMEM212	higher in PUCAI severe
2071.96	0.666796	0.118698	5.61756	1.93668e-08	2.1656e-07	LRRC19	higher in PUCAI severe
410.567	0.668678	0.230031	2.90691	0.00365021	0.00952643	AP003419.11	higher in PUCAI severe
368.264	0.668848	0.132209	5.05901	4.21441e-07	3.22722e-06	ITPKA	higher in PUCAI severe
64.8237	0.66928	0.233606	2.86499	0.00417024	0.0106834	MTRNR2L12	higher in PUCAI severe
386.343	0.669448	0.18762	3.5681	0.000359578	0.00124066	HOXD11	higher in PUCAI severe
88.4333	0.669655	0.17371	3.85501	0.000115725	0.000457358	CEMP1	higher in PUCAI severe
2096.68	0.669987	0.100594	6.66028	2.73299e-11	6.73292e-10	FAM162A	higher in PUCAI severe
774.623	0.670443	0.154222	4.34725	1.37854e-05	6.97301e-05	YBX2	higher in PUCAI severe
6537.35	0.671638	0.167572	4.00807	6.12179e-05	0.000263511	CA4	higher in PUCAI severe
527.974	0.674196	0.0844703	7.98146	1.4461e-15	1.2391e-13	RAB40B	higher in PUCAI severe
396.789	0.674583	0.114364	5.89857	3.66668e-09	5.00768e-08	METTL7B	higher in PUCAI severe
3648.85	0.67505	0.117054	5.76698	8.07025e-09	1.00553e-07	ATP2C2	higher in PUCAI severe
1976.8	0.675101	0.0839521	8.04151	8.87404e-16	7.95102e-14	TMEM98	higher in PUCAI severe
314.772	0.67645	0.123265	5.48779	4.06993e-08	4.18201e-07	ADIRF	higher in PUCAI severe
341.265	0.680341	0.105878	6.42574	1.31231e-10	2.64853e-09	PTN	higher in PUCAI severe
20.866	0.68174	0.149438	4.56201	5.06652e-06	2.91257e-05	SPINK2	higher in PUCAI severe
44.8526	0.682211	0.117189	5.82147	5.83324e-09	7.58375e-08	C11orf53	higher in PUCAI severe
287.688	0.683902	0.139574	4.89994	9.58681e-07	6.71268e-06	HOXD9	higher in PUCAI severe
241.871	0.686227	0.255844	2.68221	0.00731368	0.0172968	VPREB3	higher in PUCAI severe
56.665	0.689785	0.155904	4.42442	9.67025e-06	5.11781e-05	C8G	higher in PUCAI severe
128.645	0.691708	0.173094	3.99614	6.43844e-05	0.000275455	PRODH	higher in PUCAI severe
117.201	0.692239	0.172949	4.00256	6.26597e-05	0.00026914	OR51E2	higher in PUCAI severe
974.336	0.695077	0.112896	6.15679	7.42361e-10	1.22424e-08	DDC	higher in PUCAI severe
232.76	0.698547	0.116054	6.01916	1.75329e-09	2.64346e-08	CACNA2D2	higher in PUCAI severe
5278.79	0.699259	0.110961	6.30183	2.94144e-10	5.43723e-09	ETHE1	higher in PUCAI severe
328.195	0.699543	0.144804	4.83095	1.35883e-06	9.17095e-06	AKR1C2	higher in PUCAI severe
486.36	0.700447	0.160739	4.35766	1.31459e-05	6.68801e-05	SOSTDC1	higher in PUCAI severe
2287.91	0.70056	0.107567	6.51276	7.37808e-11	1.60911e-09	TCEA3	higher in PUCAI severe
481.255	0.701729	0.102095	6.87328	6.27438e-12	1.91043e-10	B3GNT8	higher in PUCAI severe
904.645	0.702564	0.110706	6.34619	2.20713e-10	4.22994e-09	CYP2J2	higher in PUCAI severe
947.732	0.702648	0.133911	5.24712	1.54495e-07	1.33823e-06	CLCN2	higher in PUCAI severe
622.314	0.703109	0.118002	5.95845	2.54642e-09	3.62922e-08	LRRC31	higher in PUCAI severe
55.5557	0.703388	0.131831	5.33553	9.52659e-08	8.76459e-07	GLOD5	higher in PUCAI severe
249.456	0.705765	0.154083	4.58042	4.64034e-06	2.70069e-05	TUBAL3	higher in PUCAI severe
214.407	0.706887	0.133978	5.27614	1.31936e-07	1.16873e-06	SSTR1	higher in PUCAI severe
6696.25	0.70704	0.0997665	7.08695	1.37103e-12	4.98353e-11	PRDX6	higher in PUCAI severe
63.1297	0.711301	0.217594	3.26893	0.00107955	0.00328087	CTD-2192J16.22	higher in PUCAI severe
206.061	0.71194	0.109298	6.51375	7.32993e-11	1.60109e-09	EIF4EBP3	higher in PUCAI severe
177.355	0.712114	0.185755	3.83361	0.000126275	0.000492599	SOX8	higher in PUCAI severe
122.552	0.714034	0.119378	5.98127	2.21408e-09	3.23444e-08	MROH7	higher in PUCAI severe
309.912	0.716619	0.120918	5.92648	3.09506e-09	4.31071e-08	PTGDR	higher in PUCAI severe
197.808	0.716695	0.123238	5.81555	6.04331e-09	7.84236e-08	MAMDC2	higher in PUCAI severe
146.013	0.717667	0.100949	7.10917	1.16741e-12	4.32158e-11	ZNF575	higher in PUCAI severe
72.7925	0.719225	0.142194	5.05804	4.23578e-07	3.23687e-06	AQP7	higher in PUCAI severe
2379.24	0.720313	0.101058	7.1277	1.02064e-12	3.81283e-11	VAV3	higher in PUCAI severe
776.879	0.720923	0.111663	6.45625	1.07332e-10	2.22363e-09	TEF	higher in PUCAI severe
2598.45	0.721171	0.0992773	7.2642	3.75241e-13	1.58514e-11	RAPGEFL1	higher in PUCAI severe
145.961	0.722937	0.110883	6.51982	7.03939e-11	1.54966e-09	KIAA1683	higher in PUCAI severe
112.971	0.723977	0.112905	6.41226	1.43381e-10	2.88547e-09	CCDC183	higher in PUCAI severe
671.118	0.724795	0.0834323	8.68722	3.71423e-18	7.06055e-16	NHEJ1	higher in PUCAI severe
190.772	0.725434	0.137512	5.27543	1.32444e-07	1.17249e-06	SCGN	higher in PUCAI severe
1001.7	0.7255	0.11398	6.36512	1.95132e-10	3.77569e-09	ACSM3	higher in PUCAI severe
3690.32	0.725836	0.117112	6.19778	5.72658e-10	9.72897e-09	MYO1A	higher in PUCAI severe
88.4291	0.727031	0.172596	4.21233	2.52745e-05	0.000119992	RASSF10	higher in PUCAI severe
652.38	0.72765	0.12657	5.749	8.97745e-09	1.10005e-07	C2orf82	higher in PUCAI severe
2587.53	0.728579	0.11183	6.51505	7.26658e-11	1.5922e-09	STAP2	higher in PUCAI severe
64.6185	0.728937	0.124937	5.83442	5.39782e-09	7.08312e-08	TREH	higher in PUCAI severe
43.5004	0.729794	0.127062	5.74359	9.26894e-09	1.12888e-07	CNFN	higher in PUCAI severe
5289.99	0.730366	0.103538	7.0541	1.73718e-12	6.17092e-11	PPP1R1B	higher in PUCAI severe
480.147	0.731391	0.108971	6.71182	1.92214e-11	5.0258e-10	THRB	higher in PUCAI severe
744.493	0.734595	0.102935	7.13649	9.5744e-13	3.61483e-11	PXMP2	higher in PUCAI severe
4341.24	0.737041	0.110799	6.65208	2.88983e-11	7.0488e-10	CFTR	higher in PUCAI severe
1772.87	0.738228	0.0953912	7.73895	1.00242e-14	6.4595e-13	ACADS	higher in PUCAI severe
803.302	0.738876	0.0912987	8.09296	5.82341e-16	5.31935e-14	TLE2	higher in PUCAI severe
3480.47	0.738984	0.158962	4.6488	3.3387e-06	2.01569e-05	MEP1A	higher in PUCAI severe
115.084	0.739759	0.135661	5.45298	4.9532e-08	4.96981e-07	CHRNA7	higher in PUCAI severe
131.275	0.74433	0.127516	5.83714	5.3106e-09	6.99478e-08	SGSM1	higher in PUCAI severe
94.0412	0.745243	0.176667	4.21835	2.46098e-05	0.000117152	DMRT2	higher in PUCAI severe
570.581	0.745473	0.288203	2.58663	0.00969195	0.0221039	TCL1A	higher in PUCAI severe
1694.31	0.746227	0.235929	3.16294	0.00156186	0.00453564	INSL5	higher in PUCAI severe
210.287	0.7472	0.122864	6.08153	1.1904e-09	1.87518e-08	MNX1	higher in PUCAI severe
2062.32	0.749474	0.0904171	8.28908	1.14129e-16	1.29471e-14	TRABD2A	higher in PUCAI severe
84.2968	0.753521	0.180741	4.16907	3.05841e-05	0.000142554	CD1E	higher in PUCAI severe
685.556	0.75446	0.110226	6.84467	7.6652e-12	2.26508e-10	RNF152	higher in PUCAI severe
253.856	0.75562	0.203015	3.72198	0.000197664	0.00073153	TBX10	higher in PUCAI severe
104.707	0.757223	0.16518	4.58423	4.55656e-06	2.65633e-05	NEUROD1	higher in PUCAI severe
1977.79	0.758346	0.127998	5.92465	3.12958e-09	4.35018e-08	MOGAT2	higher in PUCAI severe
551.193	0.760643	0.107716	7.06155	1.64652e-12	5.86369e-11	GPRIN2	higher in PUCAI severe
42.6238	0.760885	0.139157	5.46783	4.55591e-08	4.60733e-07	ERICH5	higher in PUCAI severe
3687.59	0.762958	0.247504	3.08261	0.00205196	0.00576837	MS4A12	higher in PUCAI severe
553.373	0.764127	0.206579	3.69895	0.000216492	0.000792452	HOXD10	higher in PUCAI severe
156.334	0.764144	0.133873	5.70798	1.14323e-08	1.35826e-07	SLC25A34	higher in PUCAI severe
114.523	0.767704	0.127754	6.00924	1.864e-09	2.76884e-08	SHD	higher in PUCAI severe
812.51	0.769583	0.134814	5.70847	1.13995e-08	1.35665e-07	CHST5	higher in PUCAI severe
412.193	0.770849	0.2213	3.48328	0.000495315	0.00164888	PRAP1	higher in PUCAI severe
209.006	0.772333	0.180154	4.28707	1.81049e-05	8.9112e-05	SULT1C2	higher in PUCAI severe
560.773	0.772452	0.122827	6.28893	3.19663e-10	5.84746e-09	SOWAHA	higher in PUCAI severe
1157.91	0.773873	0.11223	6.8954	5.37126e-12	1.66426e-10	ZBTB7C	higher in PUCAI severe
133.998	0.773892	0.167794	4.61215	3.98533e-06	2.36348e-05	MB	higher in PUCAI severe
227.568	0.774078	0.178903	4.3268	1.5129e-05	7.57636e-05	ALPI	higher in PUCAI severe
97.4899	0.775411	0.171333	4.52575	6.01808e-06	3.38219e-05	FEV	higher in PUCAI severe
1377.28	0.775984	0.10867	7.14072	9.28451e-13	3.5299e-11	PLEKHG6	higher in PUCAI severe
481.795	0.783469	0.135863	5.76661	8.08798e-09	1.00685e-07	B3GALT1	higher in PUCAI severe
814.198	0.786296	0.12829	6.12907	8.83958e-10	1.43753e-08	PTPRO	higher in PUCAI severe
104.709	0.786854	0.159832	4.92302	8.52187e-07	6.04219e-06	C2orf54	higher in PUCAI severe
964.583	0.787127	0.117156	6.71865	1.83416e-11	4.83168e-10	FMO5	higher in PUCAI severe
478.219	0.790023	0.0960683	8.22356	1.97554e-16	2.06631e-14	ILDR1	higher in PUCAI severe
42041.4	0.790815	0.144493	5.47303	4.42412e-08	4.49994e-07	MUC12	higher in PUCAI severe
101.101	0.793143	0.0959751	8.26405	1.40808e-16	1.55964e-14	ANKDD1B	higher in PUCAI severe
1265.63	0.794341	0.128919	6.16155	7.20366e-10	1.19076e-08	RP11-77K12.7	higher in PUCAI severe
992.305	0.794783	0.260601	3.04981	0.00228986	0.00634333	HOXD13	higher in PUCAI severe
193.969	0.799547	0.116099	6.88675	5.70799e-12	1.75315e-10	GAREML	higher in PUCAI severe
904.819	0.799843	0.119166	6.712	1.91979e-11	5.0258e-10	EPN3	higher in PUCAI severe
962.295	0.803932	0.202717	3.96579	7.31544e-05	0.00030801	SST	higher in PUCAI severe
852.474	0.807165	0.126353	6.38816	1.67891e-10	3.32636e-09	FAM101A	higher in PUCAI severe
50.7259	0.808477	0.164439	4.91657	8.80732e-07	6.22263e-06	PDZK1	higher in PUCAI severe
104.854	0.809403	0.156335	5.17737	2.25038e-07	1.84583e-06	TMEM63C	higher in PUCAI severe
47650.8	0.809906	0.115509	7.01161	2.35588e-12	8.03223e-11	LGALS4	higher in PUCAI severe
165.125	0.810993	0.178675	4.53893	5.65394e-06	3.21349e-05	FAM189A1	higher in PUCAI severe
1156.45	0.814384	0.112031	7.2693	3.61365e-13	1.53112e-11	PHLPP2	higher in PUCAI severe
71.6807	0.814623	0.108683	7.4954	6.60988e-14	3.28555e-12	PPP1R36	higher in PUCAI severe
515.212	0.818171	0.153444	5.33206	9.71052e-08	8.88153e-07	GAL3ST2	higher in PUCAI severe
1947.4	0.81833	0.107666	7.60066	2.94631e-14	1.68479e-12	PRR15	higher in PUCAI severe
80.6068	0.818423	0.142001	5.76348	8.23959e-09	1.02046e-07	POU2F3	higher in PUCAI severe
138.674	0.819452	0.169663	4.82989	1.36608e-06	9.20777e-06	ABHD12B	higher in PUCAI severe
3849.33	0.820727	0.10377	7.90912	2.59219e-15	2.0146e-13	EPB41L4B	higher in PUCAI severe
1513.82	0.825783	0.105645	7.81656	5.42868e-15	3.72836e-13	ARHGAP44	higher in PUCAI severe
1319.51	0.826139	0.120703	6.84438	7.68069e-12	2.26508e-10	TMEM37	higher in PUCAI severe
24300.4	0.828395	0.144899	5.71704	1.08395e-08	1.29659e-07	PHGR1	higher in PUCAI severe
387.195	0.828504	0.152811	5.42176	5.90136e-08	5.81741e-07	TTLL6	higher in PUCAI severe
58.4877	0.828955	0.205525	4.03335	5.49876e-05	0.000239848	NCCRP1	higher in PUCAI severe
12.6413	0.829942	0.195943	4.23563	2.27909e-05	0.000109196	TEX43	higher in PUCAI severe
62.3222	0.830139	0.271972	3.0523	0.00227095	0.00630213	LEFTY2	higher in PUCAI severe
676.638	0.832463	0.154246	5.39697	6.77758e-08	6.53911e-07	PDZD3	higher in PUCAI severe
114.069	0.834554	0.130819	6.37947	1.77702e-10	3.48151e-09	TTPA	higher in PUCAI severe
1338.85	0.834867	0.140538	5.94051	2.8414e-09	3.98902e-08	CDKN2B	higher in PUCAI severe
39.1946	0.836763	0.29976	2.79144	0.00524738	0.01303	KRT1	higher in PUCAI severe
1541.79	0.837523	0.141944	5.90039	3.62639e-09	4.9623e-08	PKIB	higher in PUCAI severe
67.8357	0.83811	0.157086	5.33537	9.53499e-08	8.76658e-07	FCER1A	higher in PUCAI severe
535.542	0.838113	0.106607	7.86173	3.78871e-15	2.79035e-13	AKAP7	higher in PUCAI severe
473.113	0.838163	0.292331	2.86717	0.00414155	0.0106213	UGT2B15	higher in PUCAI severe
13.9652	0.838821	0.159916	5.24538	1.55957e-07	1.34854e-06	C9orf24	higher in PUCAI severe
3770.24	0.839383	0.12678	6.62079	3.57273e-11	8.54722e-10	ENTPD5	higher in PUCAI severe
3165.53	0.841862	0.111502	7.55019	4.34635e-14	2.33359e-12	SATB2	higher in PUCAI severe
978.341	0.844068	0.174271	4.84342	1.2762e-06	8.68102e-06	NEU4	higher in PUCAI severe
919.5	0.845159	0.105898	7.98084	1.45341e-15	1.2391e-13	RHOU	higher in PUCAI severe
531.464	0.847824	0.13246	6.40061	1.54753e-10	3.08781e-09	PRLR	higher in PUCAI severe
185.809	0.849118	0.126815	6.69574	2.14588e-11	5.43895e-10	KIF5C	higher in PUCAI severe
4786.35	0.850063	0.343038	2.47804	0.0132105	0.0287888	UGT2B17	higher in PUCAI severe
1389.21	0.850738	0.139454	6.10047	1.05754e-09	1.69436e-08	KLK1	higher in PUCAI severe
133.454	0.85079	0.123228	6.90419	5.04891e-12	1.5818e-10	GAL3ST1	higher in PUCAI severe
404.7	0.852711	0.195166	4.36916	1.24723e-05	6.40742e-05	HRCT1	higher in PUCAI severe
13063.8	0.857813	0.197964	4.33318	1.4697e-05	7.37839e-05	ZG16	higher in PUCAI severe
184.128	0.858862	0.152655	5.62615	1.84276e-08	2.0688e-07	PCDH19	higher in PUCAI severe
8283.35	0.863218	0.0996022	8.66665	4.45006e-18	8.02551e-16	PDCD4	higher in PUCAI severe
3301.38	0.864634	0.18752	4.61089	4.00952e-06	2.37481e-05	PYY	higher in PUCAI severe
952.028	0.864832	0.149852	5.77124	7.86904e-09	9.87456e-08	IL1R2	higher in PUCAI severe
1358.6	0.864847	0.103835	8.32906	8.149e-17	9.71457e-15	EPHX2	higher in PUCAI severe
61.9775	0.866117	0.113982	7.59873	2.99041e-14	1.70308e-12	FAM151A	higher in PUCAI severe
1144.87	0.867546	0.214936	4.0363	5.42997e-05	0.000237437	SLC28A2	higher in PUCAI severe
808.082	0.867691	0.135428	6.40704	1.48371e-10	2.97737e-09	FGFR3	higher in PUCAI severe
57.9253	0.868083	0.14579	5.95434	2.61131e-09	3.70609e-08	CNGA1	higher in PUCAI severe
374.65	0.869174	0.119295	7.28594	3.19435e-13	1.40421e-11	CCDC152	higher in PUCAI severe
1383.61	0.869367	0.0995977	8.72878	2.57432e-18	4.96069e-16	TSPAN7	higher in PUCAI severe
28797.9	0.870244	0.238368	3.65085	0.000261379	0.000936292	ITLN1	higher in PUCAI severe
150.315	0.872173	0.141773	6.15189	7.65633e-10	1.26114e-08	KLK4	higher in PUCAI severe
50.4387	0.872781	0.172936	5.04684	4.49176e-07	3.41325e-06	CRYBA2	higher in PUCAI severe
103.96	0.873127	0.359171	2.43095	0.0150591	0.0321452	ITLN2	higher in PUCAI severe
888.577	0.877473	0.102771	8.53818	1.36358e-17	2.06253e-15	SLC22A5	higher in PUCAI severe
1497.09	0.882523	0.113102	7.80286	6.05178e-15	4.11258e-13	SLC9A2	higher in PUCAI severe
707.881	0.884025	0.148507	5.95276	2.63664e-09	3.73135e-08	EDN3	higher in PUCAI severe
533.763	0.890246	0.259464	3.4311	0.000601146	0.00195206	SCNN1G	higher in PUCAI severe
62.6533	0.890265	0.227511	3.91306	9.11322e-05	0.000371474	HAVCR1	higher in PUCAI severe
149.704	0.891034	0.200449	4.4452	8.78119e-06	4.69677e-05	ASPG	higher in PUCAI severe
162.137	0.891328	0.162702	5.47828	4.29476e-08	4.3842e-07	COX6B2	higher in PUCAI severe
19.5657	0.892453	0.19955	4.47233	7.73735e-06	4.20887e-05	TTR	higher in PUCAI severe
3171.6	0.895457	0.202436	4.42342	9.71503e-06	5.13571e-05	WFDC2	higher in PUCAI severe
306.77	0.897322	0.119605	7.50241	6.26561e-14	3.1366e-12	SAMD13	higher in PUCAI severe
119.657	0.900661	0.306846	2.93522	0.00333313	0.00879684	HOXD12	higher in PUCAI severe
2618.76	0.901778	0.171789	5.24934	1.52646e-07	1.32465e-06	SCNN1B	higher in PUCAI severe
878.75	0.904128	0.111266	8.12581	4.44386e-16	4.19542e-14	CYP4F12	higher in PUCAI severe
124.802	0.909051	0.112105	8.10895	5.10578e-16	4.7252e-14	ALDH3A1	higher in PUCAI severe
37650.2	0.913869	0.262361	3.48325	0.000495357	0.00164888	CLCA1	higher in PUCAI severe
824.437	0.915107	0.101516	9.0144	1.97957e-19	5.06302e-17	PLCD1	higher in PUCAI severe
314.465	0.921611	0.120197	7.66749	1.75391e-14	1.05889e-12	INPP5J	higher in PUCAI severe
4680.51	0.922366	0.113542	8.12355	4.52728e-16	4.24568e-14	CDX2	higher in PUCAI severe
6294.1	0.929488	0.133537	6.96051	3.3904e-12	1.10145e-10	MAOA	higher in PUCAI severe
1444.9	0.946472	0.135074	7.00705	2.43392e-12	8.25011e-11	AIFM3	higher in PUCAI severe
674.452	0.949845	0.142623	6.65981	2.74183e-11	6.74289e-10	MMP28	higher in PUCAI severe
53.2571	0.952126	0.177041	5.37801	7.5315e-08	7.19739e-07	KLK3	higher in PUCAI severe
9070.93	0.960269	0.133851	7.17415	7.27567e-13	2.85089e-11	HSD11B2	higher in PUCAI severe
220.271	0.963596	0.186272	5.17305	2.30299e-07	1.88043e-06	OGN	higher in PUCAI severe
195.271	0.967936	0.146015	6.62902	3.37919e-11	8.15353e-10	SH2D6	higher in PUCAI severe
723.836	0.969454	0.175506	5.52378	3.31781e-08	3.50387e-07	SLC17A4	higher in PUCAI severe
1830.26	0.971706	0.168992	5.75002	8.92322e-09	1.09627e-07	HEPACAM2	higher in PUCAI severe
886.807	0.973221	0.139365	6.98325	2.88427e-12	9.5466e-11	SGK2	higher in PUCAI severe
137.525	0.980699	0.189137	5.18512	2.1588e-07	1.7811e-06	CNTN3	higher in PUCAI severe
565.273	0.982399	0.143681	6.83735	8.06712e-12	2.36417e-10	PLLP	higher in PUCAI severe
64.5228	0.99375	0.175987	5.64672	1.63539e-08	1.86125e-07	SCGB2A1	higher in PUCAI severe
3618.49	1.00272	0.150097	6.68046	2.38187e-11	5.93023e-10	NXPE4	higher in PUCAI severe
176.765	1.00667	0.186037	5.41115	6.26202e-08	6.12187e-07	NPY4R	higher in PUCAI severe
141.604	1.01018	0.141284	7.14997	8.67993e-13	3.32699e-11	TRPM5	higher in PUCAI severe
751.005	1.01049	0.108496	9.31365	1.23507e-20	4.96394e-18	ACSF2	higher in PUCAI severe
1379.45	1.0124	0.110568	9.15634	5.3686e-20	1.71637e-17	IHH	higher in PUCAI severe
805.384	1.01291	0.144592	7.00529	2.4647e-12	8.31437e-11	LGALS2	higher in PUCAI severe
1851.76	1.0159	0.153676	6.61064	3.82665e-11	9.09281e-10	C2orf88	higher in PUCAI severe
69.2603	1.01826	0.137955	7.3811	1.56988e-13	7.19332e-12	CPA6	higher in PUCAI severe
55.9352	1.02409	0.132336	7.73854	1.00564e-14	6.4595e-13	RXFP4	higher in PUCAI severe
580.789	1.02699	0.142532	7.20533	5.79051e-13	2.33396e-11	EXPH5	higher in PUCAI severe
3419.05	1.03383	0.1329	7.77906	7.30665e-15	4.94148e-13	VSIG2	higher in PUCAI severe
3738.32	1.03564	0.158113	6.54996	5.75539e-11	1.28919e-09	HOXB13	higher in PUCAI severe
1174.19	1.03933	0.175497	5.92224	3.17586e-09	4.4058e-08	TMEM236	higher in PUCAI severe
18398.8	1.04885	0.194519	5.39204	6.96637e-08	6.69828e-07	FABP1	higher in PUCAI severe
151.112	1.05408	0.153099	6.88495	5.78087e-12	1.77167e-10	ATP13A4	higher in PUCAI severe
11017.4	1.05819	0.168678	6.27345	3.53126e-10	6.39307e-09	B3GNT7	higher in PUCAI severe
1261.42	1.05939	0.228515	4.63599	3.55239e-06	2.12917e-05	RETNLB	higher in PUCAI severe
116.196	1.0626	0.166808	6.37021	1.88772e-10	3.67283e-09	SH2D7	higher in PUCAI severe
1840.05	1.06875	0.137846	7.75324	8.95753e-15	5.83359e-13	VIPR1	higher in PUCAI severe
491.368	1.08015	0.136193	7.93106	2.17275e-15	1.72679e-13	PPARGC1A	higher in PUCAI severe
2546.4	1.08334	0.158985	6.81408	9.48658e-12	2.73458e-10	GCG	higher in PUCAI severe
116.128	1.09395	0.243813	4.48684	7.22877e-06	3.96596e-05	CCL23	higher in PUCAI severe
720.125	1.09735	0.20717	5.29688	1.17799e-07	1.05212e-06	GLDN	higher in PUCAI severe
1839.59	1.1184	0.215848	5.18143	2.20192e-07	1.81151e-06	LYPD8	higher in PUCAI severe
494.063	1.13156	0.232046	4.87642	1.0803e-06	7.4823e-06	NTRK2	higher in PUCAI severe
78.3882	1.14601	0.156089	7.34201	2.10417e-13	9.487e-12	HTN3	higher in PUCAI severe
524.432	1.15788	0.176125	6.57419	4.8919e-11	1.11893e-09	LDHD	higher in PUCAI severe
649.705	1.16015	0.187652	6.18248	6.31028e-10	1.05927e-08	BEST2	higher in PUCAI severe
12.2659	1.16376	0.208993	5.56841	2.57079e-08	2.78393e-07	MT3	higher in PUCAI severe
785.215	1.16751	0.152052	7.67838	1.61118e-14	9.81147e-13	IGSF9	higher in PUCAI severe
3502.53	1.17087	0.15877	7.37461	1.64825e-13	7.47931e-12	SLC4A4	higher in PUCAI severe
1682.09	1.18372	0.148491	7.97169	1.56521e-15	1.29517e-13	DHRS11	higher in PUCAI severe
294.689	1.18947	0.151259	7.86378	3.72722e-15	2.75951e-13	PCSK1N	higher in PUCAI severe
455.602	1.19533	0.186012	6.4261	1.30921e-10	2.64853e-09	SLC16A9	higher in PUCAI severe
222.162	1.20161	0.228343	5.26231	1.42257e-07	1.24681e-06	MT1M	higher in PUCAI severe
857.665	1.20184	0.156758	7.66689	1.76219e-14	1.05934e-12	ABCB1	higher in PUCAI severe
31.82	1.20736	0.25208	4.7896	1.67116e-06	1.09137e-05	UTS2	higher in PUCAI severe
468.452	1.21848	0.164803	7.39356	1.42946e-13	6.63636e-12	USP2	higher in PUCAI severe
704.499	1.22467	0.142513	8.59341	8.44284e-18	1.39724e-15	UGT1A10	higher in PUCAI severe
48.9798	1.2269	0.223685	5.48494	4.13599e-08	4.24059e-07	DPP10	higher in PUCAI severe
95.0009	1.25497	0.119514	10.5006	8.58131e-26	1.61836e-22	LGR6	higher in PUCAI severe
75.4512	1.25726	0.268399	4.6843	2.80924e-06	1.73704e-05	GSTA1	higher in PUCAI severe
265.618	1.25872	0.165917	7.58645	3.28782e-14	1.82805e-12	LRRN2	higher in PUCAI severe
2492.57	1.26785	0.167395	7.57397	3.6198e-14	1.99685e-12	CDHR1	higher in PUCAI severe
121.375	1.27439	0.164246	7.75899	8.56056e-15	5.60602e-13	RBM24	higher in PUCAI severe
416.197	1.27505	0.223804	5.69719	1.21801e-08	1.43498e-07	SLC13A2	higher in PUCAI severe
20.5444	1.2774	0.15988	7.98976	1.352e-15	1.16678e-13	TNNC2	higher in PUCAI severe
1464.27	1.27808	0.160442	7.96599	1.6391e-15	1.34838e-13	MFSD4	higher in PUCAI severe
12561.9	1.28089	0.255817	5.00703	5.52754e-07	4.11407e-06	CD177	higher in PUCAI severe
11514.8	1.29524	0.153739	8.42495	3.60909e-17	4.70084e-15	SELENBP1	higher in PUCAI severe
66.6511	1.34438	0.211389	6.35972	2.02124e-10	3.88958e-09	TNNC1	higher in PUCAI severe
182.854	1.36089	0.355076	3.83268	0.000126753	0.000493916	OTOP2	higher in PUCAI severe
350.785	1.39243	0.207992	6.69463	2.16214e-11	5.44093e-10	FRMD1	higher in PUCAI severe
108.348	1.40025	0.180702	7.74894	9.26648e-15	6.00698e-13	CHAD	higher in PUCAI severe
258.549	1.43041	0.170387	8.39507	4.65613e-17	5.95435e-15	LAMA1	higher in PUCAI severe
52.2946	1.44379	0.375611	3.84383	0.000121127	0.000475946	KRTAP13-2	higher in PUCAI severe
1000.49	1.45292	0.145979	9.95292	2.44895e-23	2.87078e-20	ISX	higher in PUCAI severe
252.79	1.45579	0.200198	7.27178	3.54773e-13	1.5169e-11	SULT1A2	higher in PUCAI severe
283.602	1.48266	0.23856	6.21507	5.13027e-10	8.8549e-09	TMEM72	higher in PUCAI severe
129.994	1.48283	0.262181	5.65575	1.5517e-08	1.77462e-07	VSTM2A	higher in PUCAI severe
2938.96	1.48819	0.168016	8.85747	8.18536e-19	1.81366e-16	PADI2	higher in PUCAI severe
35325.3	1.51646	0.210033	7.22009	5.19533e-13	2.11834e-11	SLC26A3	higher in PUCAI severe
499.254	1.52666	0.296055	5.15668	2.5136e-07	2.03212e-06	TMIGD1	higher in PUCAI severe
481.42	1.55523	0.183679	8.46714	2.51486e-17	3.46829e-15	CWH43	higher in PUCAI severe
585.604	1.59661	0.168317	9.48573	2.40701e-21	1.30229e-18	CAPN13	higher in PUCAI severe
82.6192	1.6091	0.194674	8.26558	1.39012e-16	1.55197e-14	KLK15	higher in PUCAI severe
118.992	1.62734	0.214994	7.56922	3.75465e-14	2.05512e-12	OSR1	higher in PUCAI severe
757.146	1.68536	0.234741	7.17969	6.98711e-13	2.75316e-11	UGT2A3	higher in PUCAI severe
2628.82	1.71304	0.277384	6.17571	6.58687e-10	1.10175e-08	GUCA2A	higher in PUCAI severe
1124.8	1.72235	0.207691	8.29282	1.1059e-16	1.26478e-14	TRPM6	higher in PUCAI severe
1461.51	1.79342	0.238241	7.52776	5.16191e-14	2.6598e-12	CHP2	higher in PUCAI severe
12783	1.7954	0.194936	9.21019	3.25544e-20	1.06498e-17	CA2	higher in PUCAI severe
380.193	1.82609	0.308262	5.92382	3.14539e-09	4.36784e-08	GUCA2B	higher in PUCAI severe
18948.1	1.85504	0.213908	8.67214	4.24089e-18	7.74762e-16	CKB	higher in PUCAI severe
172.477	1.8576	0.200787	9.2516	2.21156e-20	8.18684e-18	UGT1A8	higher in PUCAI severe
2145.85	1.97388	0.211592	9.3287	1.07175e-20	4.56859e-18	ADH1C	higher in PUCAI severe
360.413	1.98187	0.213543	9.28089	1.68068e-20	6.38975e-18	SLC30A10	higher in PUCAI severe
87.346	2.03174	0.329153	6.17261	6.71721e-10	1.11824e-08	FSIP1	higher in PUCAI severe
410.197	2.12524	0.251888	8.43725	3.24879e-17	4.31139e-15	ABCG2	higher in PUCAI severe
1572.98	2.49486	0.2746	9.08542	1.03301e-19	2.96557e-17	HMGCS2	higher in PUCAI severe
8350.18	2.6219	0.249847	10.494	9.20371e-26	1.61836e-22	SLC26A2	higher in PUCAI severe
1828.08	2.75538	0.289756	9.50931	1.9193e-21	1.07995e-18	PCK1	higher in PUCAI severe
9091.88	2.8397	0.345674	8.21496	2.12236e-16	2.17922e-14	CA1	higher in PUCAI severe
612.807	2.93746	0.352044	8.34402	7.18051e-17	8.86037e-15	CLDN8	higher in PUCAI severe
1923.12	4.60141	0.497765	9.24415	2.37128e-20	8.55301e-18	AQP8	higher in PUCAI severe

## Sheet: RF_outcome_gini_score
random forest (RF) lncRNAs and protein-coding genes average mean decrease gini score for predicting W4R and W52SFR, over 100 iterations
W4R lncRNAs	mean gini score			W4R Protein-coding genes	mean gini score			W4R Protein-coding genes and lncRNAs	mean gini score			W52SFR lncRNAs	mean gini score			W52SFR Protein-coding genes	mean gini score		W52SFR Protein-coding genes and lncRNAs	mean gini score
RP11.79H23.3	1.21573			BEAN1	0.668291			BEAN1	0.59475			ZIM2.AS1	1.17686			SEMA4G	0.355729		SEMA4G	0.315798
RP11.806H10.4	1.06557			FOLR3	0.462959			FOLR3	0.400541			LINC01506	1.08983			C2orf72	0.321248		C2orf72	0.306806
MIR3945HG	0.991314			FCER1A	0.422496			FCER1A	0.372962			LA16c.380H5.5	1.01595			ABCB1	0.318212		ABCB1	0.289652
RP11.223C24.1	0.983277			LPL	0.332505			LPL	0.301625			RP11.44K6.2	0.974842			SLC25A34	0.291593		ZIM2.AS1	0.282412
CYP4F35P	0.961626			CD274	0.324161			CD274	0.276392			RP11.1334A24.6	0.970844			ITPKA	0.273656		SLC25A34	0.251412
RP11.242C19.2	0.909044			ESM1	0.317975			ESM1	0.271843			B3GALT5.AS1	0.834775			RAVER2	0.265989		ITPKA	0.245944
RP11.77K12.10	0.843254			INHBA	0.280871			INHBA	0.262461			RP11.24F11.2	0.827899			CD70	0.247093		RP11.24F11.2	0.239978
AC115522.3	0.797351			PSAT1	0.267476			PFKFB3	0.237549			RP11.124B13.1	0.760559			NHEJ1	0.235203		RAVER2	0.2307
RP11.347C18.3	0.788377			MACROD1	0.266162			RP11.79H23.3	0.232949			VIPR1.AS1	0.752896			OSCAR	0.232831		LA16c.380H5.5	0.219732
LUCAT1	0.785588			PFKFB3	0.264512			RP11.806H10.4	0.23045			MIR3945HG	0.70815			EDN3	0.232078		LINC01506	0.21786
GK.AS1	0.741215			KCNN3	0.260233			FRMD1	0.227419			AC009014.3	0.681031			SCNN1B	0.222812		CD70	0.215393
LINC01506	0.731462			LYPD5	0.259236			MACROD1	0.224112			RP1.193H18.2	0.64706			CA4	0.22211		EDN3	0.205689
ST3GAL4.AS1	0.724426			FRMD1	0.255595			CYP4F35P	0.223338			RP11.44K6.4	0.61084			RHOU	0.221261		RP11.44K6.2	0.200649
RP1.134E15.3	0.723761			CCR1	0.250202			LYPD5	0.22073			RP11.750H9.5	0.606826			IL5RA	0.212191		NHEJ1	0.195616
RP11.462G2.1	0.711606			C11orf91	0.24294			CCR1	0.217048			RP11.747D18.1	0.603852			SGK2	0.210607		CA4	0.192817
LA16c.380H5.5	0.708178			PLLP	0.242073			PSAT1	0.21067			RP11.168F9.2	0.599667			PLLP	0.209229		RP11.1334A24.6	0.192643
RP11.689B22.2	0.695589			DDC	0.239155			C11orf91	0.210464			RP11.881L2.1	0.595774			PDCD4	0.208484		OSCAR	0.189927
RP11.1334A24.6	0.669728			HIST1H2BC	0.234044			ADM	0.204754			RP11.211G23.2	0.581329			PRDX6	0.204792		RHOU	0.189169
FUT8.AS1	0.665281			C2CD4A	0.232398			RND1	0.201676			CDKN2B.AS1	0.580544			INPP5J	0.203272		SCNN1B	0.187719
LINC00923	0.657853			RND1	0.231407			RP11.242C19.2	0.198411			RP11.223I10.1	0.579017			SULT1C2	0.20113		SULT1C2	0.180304
AC009014.3	0.653387			SPP1	0.229058			KCNN3	0.198217			CCAT1	0.576059			REG3A	0.200409		SGK2	0.177146
RP11.211G3.2	0.630459			ADM	0.223949			PLLP	0.197685			RP11.33O4.1	0.550509			SPP1	0.200068		PLLP	0.176651
LINC00992	0.624884			MGAM	0.223505			ENKUR	0.197515			CYP4F35P	0.547828			LYPD1	0.197806		PDCD4	0.175629
RP11.350N15.4	0.616555			SLC25A34	0.223353			HIST1H2BC	0.194409			RP11.396O20.2	0.540011			LGALS2	0.194997		INPP5J	0.173604
RP11.1228E12.1	0.607328			ENKUR	0.223231			RP11.223C24.1	0.194271			DRAIC	0.539102			PHLPP2	0.191208		IL5RA	0.171727
RP11.92C4.6	0.601085			MMP10	0.221157			C2CD4A	0.190947			RASSF8.AS1	0.534792			IGSF6	0.190477		SPP1	0.171667
RP11.37L2.1	0.572069			HECW2	0.219013			MMP10	0.188855			AC115522.3	0.518234			SLC13A2	0.186861		REG3A	0.169848
RP6.159A1.4	0.561478			LAMC2	0.210288			SLC25A34	0.187099			RP11.486O13.2	0.501387			ITLN1	0.181571		IGSF6	0.162616
RP5.965G21.4	0.536186			NCOA7	0.205208			DDC	0.187064			RP11.347C18.3	0.488046			DEFB4A	0.181301		ENTPD5	0.160925
LINC01484	0.52996			GJA5	0.204369			MIR3945HG	0.186853			LINC01272	0.480501			FCER1A	0.178194		LGALS2	0.16046
LINC01272	0.522373			LAX1	0.200837			SPP1	0.18616			RP11.482G13.1	0.477741			CBS	0.177443		PHLPP2	0.160321
AC005944.2	0.516857			ABHD12B	0.196401			MGAM	0.183142			LINC00238	0.47739			AQP8	0.173076		LYPD1	0.159848
CTB.61M7.2	0.512884			SPRR2A	0.195904			GJA5	0.18248			RP11.350N15.4	0.467168			GPR27	0.170948		SLC13A2	0.15908
RP11.89H19.2	0.491884			FLRT3	0.193557			LAMC2	0.178298			CTD.2334D19.1	0.45932			HS3ST2	0.169842		PRDX6	0.158278
AC093627.8	0.485661			IL1A	0.19189			HECW2	0.175836			CTC.297N7.9	0.458579			UGT2B15	0.168859		DEFB4A	0.157807
RP11.33O4.1	0.485254			CD55	0.190557			FLRT3	0.173383			DIO3OS	0.454088			MAOA	0.168824		RP11.124B13.1	0.156978
ZIM2.AS1	0.480277			PLCD1	0.188386			RP11.77K12.10	0.173152			AP000344.3	0.451391			MTRNR2L12	0.167844		AQP8	0.155673
LINC00582	0.479161			ZBP1	0.188127			RP11.347C18.3	0.171671			RP11.69I8.2	0.451098			ENTPD5	0.167253		GPR27	0.154714
RP11.350J20.12	0.468663			STOM	0.187509			PLCD1	0.167527			RP6.159A1.4	0.44476			MEP1A	0.162427		B3GALT5.AS1	0.153769
LINC01612	0.4683			TGM2	0.184733			SPRR2A	0.167387			RP11.67C2.2	0.439884			CLDN23	0.161908		HS3ST2	0.151792
TMEM220.AS1	0.462804			VNN2	0.181965			LINC00923	0.166062			RP11.160O5.1	0.436333			PCK1	0.161213		FCER1A	0.150989
RP3.406A7.7	0.462761			FABP1	0.176383			ABHD12B	0.166037			RP11.211G3.2	0.42808			VSTM2A	0.15933		ITLN1	0.150692
RP11.334E6.12	0.458202			PCSK1N	0.174187			TGM2	0.165568			RP11.367G18.1	0.425671			VSIG4	0.157068		CBS	0.15055
AC114730.3	0.45734			MT.CO3	0.172287			FABP1	0.165283			RP11.297L17.2	0.42496			HOXD10	0.155006		UGT2B15	0.148752
LINC01002	0.457271			CHAC1	0.17142			LINC01506	0.164702			H19	0.419658			NHSL1	0.154732		SULT2B1	0.146404
RP11.216L13.19	0.454242			PRAP1	0.171093			NCOA7	0.162417			CERS6.AS1	0.418965			CACNA1C	0.15432		PCK1	0.145824
MNX1.AS2	0.453944			USP2	0.170842			LAX1	0.158239			AC114730.5	0.415238			PDZK1	0.153593		MTRNR2L12	0.142298
ERVH.1	0.453706			BCAT1	0.168365			CD55	0.157824			RP11.7K24.3	0.41442			SULT2B1	0.152854		VSIG4	0.141436
CTC.441N14.2	0.451777			MTRNR2L12	0.161781			ZBP1	0.157608			ERVH.1	0.406064			CDKN2B	0.152771		MAOA	0.140751
MIAT	0.444346			PHGDH	0.160209			RP11.462G2.1	0.156396			MIR503HG	0.395175			AC018755.18	0.152411		VSTM2A	0.139607
CASC19	0.441084			HBA1	0.159024			IL1A	0.155658			HOXA11.AS	0.392808			ITGAX	0.150547		AC018755.18	0.136665
LINC01503	0.435394			NOS2	0.158947			PRAP1	0.154508			RP1.170O19.14	0.387622			TEX43	0.148463		MEP1A	0.136432
DRAIC	0.434789			DPF3	0.158884			VNN2	0.153122			AC114730.3	0.386655			RAPGEFL1	0.147517		ISX	0.136135
RP11.286O1.1	0.43134			ANGPT2	0.156114			STOM	0.147662			LINC00152	0.385157			UTS2	0.146742		CDKN2B	0.133914
RP6.65G23.5	0.425535			DIO2	0.156094			AC115522.3	0.146784			LINC01235	0.382219			HSPA6	0.146678		RP11.44K6.4	0.133236
WNT5A.AS1	0.421063			IFIT3	0.155489			PCSK1N	0.146031			RP11.19N8.4	0.369503			GREM1	0.14586		CLDN23	0.133234
LINC00152	0.419938			BATF2	0.15491			ST3GAL4.AS1	0.145799			RP11.356O9.2	0.369109			IHH	0.145739		RAPGEFL1	0.131978
LINC00345	0.417856			ALDH3A1	0.153462			FUT8.AS1	0.144403			RP11.297D21.2	0.368036			ECSCR	0.145664		HOXD10	0.131902
RP11.514F3.5	0.413994			CXCL3	0.153096			RP1.134E15.3	0.14357			CTB.31N19.3	0.366261			IL1A	0.143005		NHSL1	0.131029
RP11.538I12.2	0.413753			EYA2	0.152551			RP11.350N15.4	0.141352			LINC01224	0.366173			PLCD1	0.142434		VIPR1.AS1	0.13086
KB.1507C5.4	0.413097			IGSF9	0.152525			LA16c.380H5.5	0.140783			LINC01484	0.365499			IL24	0.142166		ITGAX	0.130274
AC021218.2	0.411886			PDE4B	0.152363			RP11.689B22.2	0.140621			RP11.627G23.1	0.363713			COX6B2	0.141293		GREM1	0.129667
CH17.360D5.1	0.406571			CXCL1	0.151779			DPF3	0.138453			RP11.223C24.1	0.358601			PRAP1	0.141213		VMO1	0.129309
PCAT19	0.404765			PGAP3	0.151034			BCAT1	0.137732			RP13.616I3.1	0.358359			RGL4	0.140562		PLCD1	0.128561
LINC00520	0.40303			SLC6A14	0.150392			IGSF9	0.137572			CH507.513H4.5	0.355619			ISX	0.140468		RGL4	0.127658
RP11.19N8.4	0.402574			CYP2S1	0.150223			ALDH3A1	0.136618			FUT8.AS1	0.355171			VMO1	0.138737		HSPA6	0.127526
LINC01123	0.400336			DEFB4A	0.15016			ANGPT2	0.136172			CH507.513H4.3	0.353377			HOXB13	0.137703		COX6B2	0.126562
RP11.211G23.2	0.400106			HIF3A	0.150043			NOS2	0.135658			RP6.65G23.5	0.35277			SP6	0.137417		RP11.168F9.2	0.125578
AC006126.4	0.397269			CPA6	0.148839			CHAC1	0.135403			CH17.360D5.1	0.352742			SULT1A1	0.137074		CACNA1C	0.124775
RP11.168F9.2	0.393878			PPBP	0.148319			CYP2S1	0.134401			CH507.513H4.6	0.352081			FMO5	0.135748		PRAP1	0.124517
RP11.20I20.4	0.393877			IL6	0.146244			USP2	0.13423			CTD.2566J3.1	0.351446			PYY	0.135403		FMO5	0.12406
RP11.627G23.1	0.393119			FCN3	0.14602			GK.AS1	0.13364			RP11.96D1.11	0.349905			TMEM171	0.134463		TEX43	0.122722
LINC01235	0.3931			GBP1	0.145441			PHGDH	0.132805			ST3GAL4.AS1	0.349118			CCR1	0.134319		RP1.193H18.2	0.122202
RP1.193H18.2	0.389721			GAREML	0.144236			IL1RAP	0.132795			CH507.513H4.4	0.34623			TFCP2L1	0.133397		IL1A	0.120577
RP11.747D18.1	0.388559			SLC28A2	0.142996			MT.CO3	0.131797			RP11.806H10.4	0.343786			CLCN2	0.132913		RP11.211G23.2	0.120529
RP13.497K6.1	0.381562			OTOP2	0.142919			OTOP2	0.131507			RP13.152O15.5	0.336317			CES2	0.132756		PDZK1	0.120422
RP11.297L17.2	0.378411			CDKN2B	0.1423			PPBP	0.131488			MNX1.AS2	0.335678			ALDOB	0.131076		SP6	0.120195
RP11.467J12.4	0.376009			CTSL	0.141264			IL13RA2	0.13135			RP13.497K6.1	0.334907			LINC00694	0.131056		TFCP2L1	0.119571
RP11.124B13.1	0.374526			IL1RAP	0.139702			RP11.1334A24.6	0.130938			DDR1.AS1	0.334252			FCER1G	0.13018		AC009014.3	0.119157
RP11.44K6.4	0.373364			GLYATL1	0.139279			RP11.1228E12.1	0.130472			RP11.380P13.1	0.331396			PDZD3	0.129905		SULT1A1	0.118824
CDKN2B.AS1	0.37104			LILRA6	0.138185			IFIT3	0.129682			AC116366.5	0.328866			CCL23	0.129835		CES2	0.118484
CH507.513H4.5	0.367287			IKBIP	0.136733			RP11.92C4.6	0.129048			LINC01269	0.325851			VAV3	0.129754		HOXB13	0.118453
DIO3OS	0.365318			SHD	0.136726			PGAP3	0.128917			RP11.79H23.3	0.32579			NCCRP1	0.129045		TMEM171	0.118353
RP11.367G18.1	0.364549			IL13RA2	0.136321			SLC6A14	0.128208			RP11.61A14.1	0.320274			MYO1A	0.128989		ECSCR	0.118133
RP1.170O19.14	0.361226			PRR15	0.133153			DEFB4A	0.127558			RP11.77K12.10	0.319573			GLOD5	0.127928		LINC00694	0.115425
RP11.96D1.11	0.359598			HIF1A	0.1322			MTRNR2L12	0.127378			AF064858.10	0.319226			ESPN	0.127317		IHH	0.114625
RP11.400K9.4	0.358677			CEMP1	0.131614			HBA1	0.127237			RP11.286O1.1	0.314146			BEAN1	0.127057		IL24	0.11398
RP11.292E2.2	0.357277			SHH	0.130019			SLC28A2	0.1266			RP11.1029J19.4	0.313025			SLC26A3	0.125897		BEAN1	0.113014
RP11.321G12.1	0.357263			RAB38	0.129463			LUCAT1	0.126227			RP11.1029J19.5	0.312987			MT1M	0.124889		MYO1A	0.112332
RP11.67C2.2	0.357043			NAMPT	0.128977			PDE4B	0.126182			LINC00345	0.310013			CCL18	0.124827		CYP4F35P	0.112069
RP11.160O5.1	0.355637			NRCAM	0.128352			GBP1	0.125398			LUCAT1	0.3077			C8G	0.123226		NCCRP1	0.112034
RP11.7K24.3	0.355034			CD70	0.128169			CXCL3	0.123344			CASC19	0.307433			SPRR1B	0.122371		PDZD3	0.111806
FAM3D.AS1	0.354035			COL4A1	0.127771			BATF2	0.122345			RP1.134E15.3	0.305613			SPOCD1	0.122005		UTS2	0.11131
CTA.384D8.31	0.353282			CNFN	0.127729			IL6	0.121935			PCAT19	0.304515			SOSTDC1	0.120248		CCL23	0.110659
RP11.396O20.2	0.352779			FABP5	0.125891			DIO2	0.120631			RMRP	0.303741			CCL4L2	0.120106		C8G	0.108912
FAM157B	0.351482			STRIP2	0.125211			CTSL	0.120602			FAM157B	0.299812			GCG	0.120017		CCL18	0.108847
LINC01269	0.350222			SPINK2	0.124714			EYA2	0.120275			LINC01002	0.298309			RNF152	0.119199		CCR1	0.108836
H19	0.350053			ERRFI1	0.124429			CDKN2B	0.118886			RP11.439L18.2	0.297953			TTLL6	0.118269		FLRT3	0.108217
SATB2.AS1	0.349939			CACNA1C	0.123332			AC009014.3	0.118509			RP11.386G11.10	0.297899			FADS2	0.118195		LILRB1	0.108041
RP11.316M1.12	0.348449			NHSL1	0.123093			FCN3	0.118433			CTD.2555C10.3	0.297375			FLRT3	0.118182		PYY	0.1065
AC002511.3	0.348433			LYPD1	0.122443			LINC00992	0.116967			LINC01123	0.288917			RSPO3	0.118135		GCG	0.106249
CTC.297N7.9	0.344623			C2orf72	0.122419			RP5.965G21.4	0.115033			RP11.37L2.1	0.287249			FCN1	0.11614		SPOCD1	0.105908
AC034220.3	0.342467			BEST2	0.121553			LILRA6	0.114912			LINC00992	0.286037			SPNS2	0.115056		MT1M	0.105721
RP11.356O9.2	0.337841			AC018755.18	0.121487			CPA6	0.114374			AF127577.10	0.285518			TREH	0.114507		ESPN	0.105473
RP13.152O15.5	0.336487			TRPA1	0.121059			FABP5	0.113683			RP1.261G23.7	0.284117			TUBAL3	0.114084		CLCN2	0.105442
CCAT1	0.335218			SULT1A1	0.120688			HIF1A	0.113393			XXbac.B476C20.9	0.280983			LILRB1	0.11402		VAV3	0.104919
RP13.616I3.1	0.333199			SCNN1B	0.120419			DYSF	0.112844			FAM3D.AS1	0.279428			FSIP1	0.113391		FCER1G	0.104504
MIR503HG	0.329597			S100A12	0.120235			NRCAM	0.112248			RP11.334E6.12	0.279044			TMEM212	0.112214		RP11.750H9.5	0.104186
RP11.223I10.1	0.328722			UNC5CL	0.120215			CXCL1	0.112009			RP11.283G6.4	0.27717			MXI1	0.111632		TRPM6	0.103884
RPPH1	0.327942			SST	0.120031			COL4A1	0.111627			AC005944.2	0.27701			PTGES	0.111523		FCN1	0.103675
RP11.386G11.10	0.327699			CRYBA2	0.119548			SHD	0.110902			RP11.321G12.1	0.276658			SPINK4	0.111128		RP11.223I10.1	0.103511
NOVA1.AS1	0.326595			ADGRF1	0.119259			HIF3A	0.110015			RP11.54A4.2	0.276627			SLC22A5	0.111057		SPRR1B	0.103028
CTB.31N19.3	0.326478			CBS	0.119171			NHSL1	0.108507			RP11.405A12.2	0.275529			SYP	0.110854		RSPO3	0.102427
GATA6.AS1	0.324408			XDH	0.118176			GLYATL1	0.108386			RP11.350J20.12	0.275395			TRPM6	0.110683		MIR3945HG	0.102148
RP11.1029J19.4	0.322387			FCGR3B	0.118044			GAREML	0.108266			RP11.16E12.2	0.273775			AOX1	0.110052		FSIP1	0.10138
AP000344.3	0.31962			EVA1A	0.117972			CD70	0.108096			AC002511.3	0.273747			OLFML2B	0.109953		ALDOB	0.101183
RP11.482G13.1	0.318255			DYSF	0.117903			SHH	0.107742			CTB.61M7.2	0.27324			CTD.3214H19.16	0.109847		RNF152	0.100928
CA3.AS1	0.3156			FCAR	0.117759			ADGRF1	0.107191			SATB2.AS1	0.271232			CCDC3	0.109651		RP11.881L2.1	0.10091
RP11.1070N10.3	0.310758			IL5RA	0.117417			CEMP1	0.106721			RP11.20I20.4	0.270555			PLCE1	0.109108		TUBAL3	0.100616
RP11.118B18.2	0.308919			SPRR1B	0.117247			RP6.159A1.4	0.106686			RP11.74E22.3	0.270165			NRP2	0.108191		CCL4L2	0.100348
RP1.261G23.7	0.306179			FAM92B	0.116996			RAB38	0.106638			RP11.89H19.2	0.269195			ITLN2	0.108145		PLCE1	0.0997129
AC011523.2	0.302148			KYNU	0.116709			IKBIP	0.106187			AP000439.3	0.26793			IGSF9	0.107992		SLC26A3	0.0994846
RP11.61A14.1	0.301971			ETHE1	0.116489			RP11.211G3.2	0.105981			TMEM220.AS1	0.264736			SST	0.107794		CERS6.AS1	0.0992081
SH3PXD2A.AS1	0.301878			SLC4A11	0.116292			CACNA1C	0.105633			AC007192.6	0.264133			CLDN14	0.107354		GLOD5	0.0977069
CTD.2566J3.1	0.301235			TNIP3	0.115659			BEST2	0.10536			RP11.290L1.3	0.26292			VSIG2	0.107329		MT1F	0.0976322
CTD.2334D19.1	0.300939			DLC1	0.115337			FCGR3B	0.105301			CTC.441N14.2	0.26221			MTCL1	0.106898		PTGES	0.0973475
RP11.357H14.17	0.30021			C2orf54	0.11475			SPRR1B	0.105172			RP5.965G21.4	0.260805			HTN3	0.106271		HCAR2	0.0970384
RP11.44K6.2	0.297313			AHNAK2	0.114543			SPINK2	0.104738			AC093627.8	0.258139			PRLR	0.105968		HTN3	0.0964616
RP11.595B24.2	0.296003			FSTL1	0.114112			ERRFI1	0.10398			RP11.118B18.2	0.257885			CD163	0.105956		MXI1	0.0957467
RP11.1029J19.5	0.294267			PIM2	0.112973			NAMPT	0.103126			RP11.513I15.6	0.25737			PSAT1	0.105917		AOX1	0.0954521
HOXB.AS4	0.29394			BCL2A1	0.11237			LYPD1	0.102191			AC006126.4	0.256318			PLD4	0.105825		AC115522.3	0.095247
RP11.24F11.2	0.293644			ASPG	0.112367			IL5RA	0.101999			RP11.536O18.1	0.254581			MT1F	0.1057		LILRA2	0.0951283
RP11.275I4.2	0.293509			CCL18	0.111631			CNFN	0.10196			AC002398.12	0.253462			LILRA2	0.105669		GSTA1	0.0949232
RP11.513I15.6	0.293121			APOBEC3A	0.111107			AC093627.8	0.101822			RP11.357H14.17	0.253077			FABP5	0.105602		SOSTDC1	0.0948717
LINC00238	0.292498			MMP7	0.111			SCNN1B	0.101803			CTA.384D8.31	0.252947			LILRA5	0.104871		TMEM212	0.0943462
GATA2.AS1	0.292342			ADGRG3	0.110698			PRR15	0.101408			RPPH1	0.252013			GSTA1	0.104738		SPNS2	0.0942465
RP13.1016M1.2	0.292327			WARS	0.109655			CRYBA2	0.100816			RP11.627K11.6	0.249859			ADGRF5	0.104692		PSAT1	0.094152
LINC01224	0.288565			ALDOB	0.109313			TREM1	0.100346			RP11.514F3.5	0.249785			C3orf36	0.104598		VSIG2	0.094111
RP11.74E22.3	0.288402			NPTX2	0.109098			LINC01612	0.0995474			RP3.406A7.7	0.249739			KLK3	0.10448		CCDC3	0.0933344
AGAP2.AS1	0.288152			FST	0.109041			DLC1	0.0986976			NOVA1.AS1	0.247399			HIF3A	0.104342		CTD.3214H19.16	0.0931561
AC116366.5	0.286642			LIPG	0.10902			AC005944.2	0.0984648			LINC01612	0.247274			CNGA1	0.10429		SIGLEC5	0.0930267
AF064858.10	0.285333			MTRNR2L1	0.1082			KYNU	0.0983658			RP11.400K9.4	0.24713			GPR20	0.104184		RP11.747D18.1	0.0929338
RP11.881L2.1	0.282035			MCAM	0.108153			TNIP3	0.0977863			LINC00582	0.245641			ZMYND15	0.10389		FABP5	0.0928841
RP11.542M13.2	0.279941			FSIP1	0.108033			XDH	0.0976998			AGAP2.AS1	0.244418			HCAR2	0.103878		TTLL6	0.0919642
CH507.513H4.6	0.276947			AZGP1	0.107828			C2orf72	0.0974277			RP11.595B24.2	0.24349			FGFR3	0.103727		NRP2	0.091857
CH507.513H4.3	0.276406			PRDX6	0.107551			C2orf54	0.0969374			RP11.316M1.12	0.242834			SLC26A2	0.103152		DRAIC	0.0915151
RP11.575F12.2	0.276274			RETNLB	0.107444			ERVH.1	0.0966937			RP11.575F12.2	0.242559			CKB	0.102565		CDKN2B.AS1	0.091178
RASSF8.AS1	0.275286			HRASLS2	0.107189			SULT1A1	0.0961935			AC021218.2	0.240301			SAMD13	0.102427		OLFML2B	0.0911461
CH507.513H4.4	0.274933			PTGDR	0.106932			FCAR	0.0961482			RP11.110I1.6	0.238918			ANGPT2	0.102369		MTCL1	0.0910993
RP11.63M22.2	0.270761			SOCS1	0.106793			SST	0.0959165			LINC00520	0.23857			LPL	0.101808		RP11.33O4.1	0.0910511
AC002398.12	0.269216			BMX	0.106717			PTGDR	0.0958888			RP11.357P18.2	0.238307			TMIGD1	0.101475		ITLN2	0.0910027
RP11.69I8.2	0.26881			TFAP2C	0.106487			ANXA1	0.0958237			AC034220.3	0.238204			CCL3	0.101097		CTD.2334D19.1	0.0908726
RP11.16E12.2	0.268201			TRIM7	0.105987			S100A9	0.0955847			GK.AS1	0.236242			B3GALT1	0.100929		IGSF9	0.0906815
B3GALT5.AS1	0.268063			CLEC5A	0.105818			ITGA2	0.095443			RP11.275I4.2	0.235295			PKDCC	0.100707		MT.CO3	0.0905716
RP11.536O18.1	0.264864			WNT4	0.105755			LINC00582	0.095441			RP11.884K10.6	0.23413			SPINK2	0.100582		CNGA1	0.0905593
RP11.1060J15.9	0.264014			POU2F3	0.105744			PRDX6	0.0953515			SH3RF3.AS1	0.234116			KRT1	0.100473		FADS2	0.0903894
RP11.627K11.6	0.259411			THY1	0.105618			AC018755.18	0.09475			PP14571	0.233761			SIGLEC5	0.100343		ZMYND15	0.0902456
RP11.439L18.2	0.259006			SH2D7	0.105084			TRPA1	0.094622			LINC00923	0.232847			UGT2B17	0.0996385		KLK3	0.0900071
XXbac.B476C20.9	0.256612			HS3ST2	0.104922			FAM92B	0.0944982			HOXB.AS4	0.23249			MT3	0.0993994		SST	0.0892933
WISP1.OT1	0.256543			SMOC1	0.10481			BMX	0.0941504			GATA2.AS1	0.231285			RASGRP4	0.0993097		PRLR	0.0892792
MIR4435.2HG	0.255069			AIFM3	0.104753			SH2D7	0.0938574			RP11.216L13.19	0.228969			MB	0.0990991		CD163	0.0890342
RP11.283G6.4	0.254246			NAT2	0.104305			SLC4A11	0.0938396			LINC01410	0.22776			LEFTY2	0.0989952		RP11.77K12.7	0.0884813
PP14571	0.247109			BNIP3	0.10427			STRIP2	0.0935557			GATA6.AS1	0.226143			MT.CO3	0.0987841		SAMD13	0.0884509
SH3RF3.AS1	0.246115			PCDH19	0.104198			LINC01484	0.0927471			RP11.292E2.2	0.225784			ACVR1C	0.0985715		CLDN14	0.0883013
RP11.884K10.6	0.245403			SPINK4	0.103951			ETHE1	0.0926718			RP11.1070N10.3	0.224528			FST	0.0984275		RP11.396O20.2	0.0881488
AP000439.3	0.245277			ANXA1	0.103941			TNFRSF10C	0.0926713			AC011523.2	0.224044			SLC9A2	0.0982346		CKB	0.0880292
RP11.357P18.2	0.241709			CLDN1	0.103678			ADGRG3	0.0923755			RP11.64K12.4	0.223574			VIPR1	0.0981014		PLD4	0.0878772
CTD.2555C10.3	0.241366			ITGA2	0.103566			CBS	0.0920757			RP11.689B22.2	0.223452			WBSCR27	0.0972902		TREH	0.0878498
RP11.750H9.5	0.238732			TNFRSF10C	0.103483			AHNAK2	0.0917182			RP11.1060J15.9	0.223379			RND1	0.0967373		LILRA5	0.0877732
DDR1.AS1	0.23743			SLC16A9	0.103408			ASPG	0.0912867			RP11.462G2.1	0.222931			SLC28A2	0.0966473		TMIGD1	0.0876607
RP11.380P13.1	0.236139			SPRY4	0.103348			WNT4	0.0910134			RP11.63M22.2	0.219959			CBR3	0.0964899		LILRA1	0.0874005
RP11.110I1.6	0.234515			HPGDS	0.10305			FSTL1	0.0908442			RP11.538I12.2	0.217243			CD177	0.0960827		SLC22A5	0.0873215
RP11.54A4.2	0.23092			MB	0.102604			FST	0.0906576			WISP1.OT1	0.215893			IL1RN	0.0960311		CCAT1	0.0867917
RP11.486O13.2	0.23078			HBB	0.102472			HRASLS2	0.0905057			RP11.242C19.2	0.21529			TNNC1	0.0958161		HIF3A	0.0863046
AF127577.10	0.229389			ADGRL4	0.102364			WARS	0.0903654			RP11.1228E12.1	0.209915			SGSM1	0.0953686		SPINK4	0.0861303
RP11.297D21.2	0.22889			TREM1	0.102235			NEUROD1	0.0901649			LINC01503	0.207415			AKAP7	0.0952121		CD177	0.0857048
HOXA11.AS	0.224103			SLC13A2	0.101851			EVA1A	0.0899778			WNT5A.AS1	0.206027			SAA2	0.0948227		HPGDS	0.0854783
RMRP	0.223961			SH2D6	0.101717			BCL2A1	0.0899695			SH3PXD2A.AS1	0.202412			MFSD4	0.0948006		SYP	0.0853927
CERS6.AS1	0.222459			FAM3B	0.101634			SH2D6	0.0899193			KB.1507C5.4	0.201236			HPGDS	0.0947481		ANGPT2	0.0851232
AC114730.5	0.220262			OVOL2	0.101532			RETNLB	0.0899042			RP11.589M4.1	0.200969			PIGZ	0.0946008		ADGRF5	0.0850602
RP11.589M4.1	0.218868			LRRN2	0.101451			UNC5CL	0.0897155			RP11.467J12.4	0.198398			CST7	0.0943529		VIPR1	0.0846416
VIPR1.AS1	0.217601			G0S2	0.100615			CASC19	0.0896439			RP11.92C4.6	0.197131			KRT6B	0.0941632		ANGPTL2	0.0846319
LINC01410	0.216507			NEUROD1	0.100189			ZIM2.AS1	0.0896384			DPP10.AS1	0.196011			CPXM1	0.0940666		CH507.513H4.5	0.0844127
DPP10.AS1	0.206097			CTSB	0.0994697			LIPG	0.0895477			RP11.638I2.9	0.195555			C2CD4A	0.0940074		RASSF8.AS1	0.0844101
RP11.405A12.2	0.203869			MROH7	0.0993562			S100A12	0.0892656			RP13.1016M1.2	0.192089			RP11.77K12.7	0.0938944		GPR20	0.0842815
RP11.64K12.4	0.203011			SLC11A1	0.0978839			PIM2	0.0889632			RP11.542M13.2	0.191986			SLC6A7	0.0932269		LINC00238	0.084073
CTB.31O20.3	0.195426			ADH1C	0.0977693			SMOC1	0.0888874			MIAT	0.190039			ABCG2	0.0931103		SPINK2	0.0835837
RP11.638I2.9	0.192736			TRAPPC6A	0.0977415			AIFM3	0.0887355			MIR4435.2HG	0.188495			HGF	0.0926357		C3orf36	0.0834751
AC007192.6	0.17334			REG1A	0.0973274			BNIP3	0.0882358			CA3.AS1	0.174108			KLK15	0.092465		KRT1	0.0834652
CTC.518B2.12	0.168441			S100A9	0.0970703			AZGP1	0.0880134			RP11.334J6.7	0.172752			OLR1	0.0922265		RP11.486O13.2	0.0834243
RP11.290L1.3	0.153504			CARD17	0.0969055			SCGN	0.0877791			CTB.31O20.3	0.159191			IFIT3	0.0920491		FFAR2	0.0832387
RP11.334J6.7	0.145597			LAMA3	0.0969043			MCAM	0.0875857			CTC.518B2.12	0.119049			FJX1	0.0920311		RP11.367G18.1	0.0832234
				PLCE1	0.0968286			SOD2	0.0874371							NEUROD1	0.0915514		ACVR1C	0.0830765
				KLF5	0.0966597			CLDN1	0.0872214							FFAR2	0.0914804		SAA2	0.0830704
				AGT	0.0964926			CCL18	0.0868819							SLC35G2	0.0911925		RP11.347C18.3	0.0830178
				SNCAIP	0.0964819			ADGRL4	0.0865639							CHCHD10	0.0910284		IL1RN	0.0826087
				IGF2BP3	0.0963474			NAT2	0.0864743							LILRA6	0.0908164		MB	0.0824524
				SYP	0.0963428			APOBEC3A	0.0864589							LILRA1	0.0907619		CBR3	0.0824289
				SOD2	0.0962792			SPRY4	0.0864066							HRASLS2	0.0906691		PKDCC	0.0823667
				IL17A	0.0962198			POU2F3	0.0863962							LILRB4	0.0906608		FJX1	0.0823508
				MMP25	0.096137			RP11.37L2.1	0.0862088							CHRDL2	0.0905555		HOXD12	0.0820968
				NXPE1	0.0960413			RP3.406A7.7	0.0858622							TMEM63C	0.0901569		OLR1	0.0813956
				NCCRP1	0.0959004			ITGB6	0.0857725							TM4SF20	0.0901147		FGFR3	0.0813176
				LINC00694	0.0958669			NPTX2	0.0857606							HOXD12	0.0900313		ARHGAP44	0.0806893
				SNAI1	0.0958324			CTSB	0.085734							ANGPTL2	0.0899394		CCL3	0.0804793
				PI15	0.0957371			NXPE1	0.0856384							C4BPA	0.0896445		RASGRP4	0.0804782
				TACSTD2	0.0957212			HPGDS	0.0854799							UGT1A8	0.0893703		CTC.297N7.9	0.0798041
				TSPO2	0.095268			CLEC5A	0.0846224							BCAT1	0.0887322		RP11.67C2.2	0.079677
				DUOXA2	0.0950333			RP11.350J20.12	0.0844658							TRIM7	0.0884113		RP11.350N15.4	0.0795199
				PTGS2	0.0947872			WNT5A.AS1	0.0841728							AQP7	0.0883408		UGT1A8	0.0794828
				SLC1A3	0.0947669			ADGRF5	0.08416							B3GNT7	0.0880978		NOS2	0.0794789
				SGSM1	0.0947252			TFAP2C	0.0840458							S100A9	0.0879801		SLC26A2	0.0794115
				FCER1G	0.0945066			PCDH19	0.0838878							ARHGAP44	0.0878104		LEFTY2	0.0793973
				CLDN14	0.0942764			MTRNR2L1	0.0837744							ALPI	0.0874829		B3GALT1	0.0792001
				PAPPA	0.0942067			ALDOB	0.0837555							SUSD2	0.0874609		ABCG2	0.0789171
				OSM	0.0939731			LRRN2	0.083422							FAM83A	0.0873352		SUSD2	0.078496
				ITGB6	0.0938745			SLC13A2	0.0833888							IL1R2	0.0873215		RND1	0.0781781
				ADGRF5	0.0937635			RP11.538I12.2	0.0832463							NXPE1	0.0870822		CST7	0.0779126
				MMRN1	0.093762			SGSM1	0.0832238							ACSM3	0.0869813		FAM83A	0.0778059
				AQP8	0.0937066			LINC00694	0.0831897							FEV	0.0869029		MT3	0.0777971
				C11orf96	0.0935722			TRAPPC6A	0.0831829							PADI2	0.0867865		LPL	0.0777629
				CHST15	0.0933909			G0S2	0.0831356							CD300A	0.0863755		SLC6A7	0.0777467
				TDO2	0.0932685			INPP5J	0.0829712							MNX1	0.0862244		RP11.297L17.2	0.0776026
				MS4A12	0.0931616			CSF2	0.0826281							C9orf24	0.0862076		TRPM5	0.0773615
				KDR	0.0930179			HBB	0.0826252							FGF2	0.0860456		NEUROD1	0.0773326
				PDZK1IP1	0.0926316			LAMA3	0.0825024							WFDC2	0.086012		MFSD4	0.0772691
				B3GALT1	0.0925259			MIAT	0.082487							WNT4	0.0859508		LILRB4	0.0772456
				UTS2	0.0924839			TRIM7	0.0824015							AGPAT4	0.0854349		AKAP7	0.0770346
				TLR4	0.0924498			FAM3B	0.0822716							INHBB	0.0853769		LINC01235	0.0762627
				LAMC3	0.0923542			SOCS1	0.0821685							LAMA3	0.0853527		FST	0.0760306
				LILRA5	0.0922218			SPINK4	0.0821311							ALOX5	0.0853238		CHRDL2	0.0759865
				CAPN13	0.0920215			MMP7	0.0821176							NOS2	0.0850115		SLC35G2	0.0759593
				PPP1R36	0.0919888			SLC16A9	0.0817755							SPIB	0.0846144		HGF	0.0758298
				MT1M	0.0916158			IGF2BP3	0.0817407							IL2RA	0.084572		UGT2B17	0.0758287
				IDO1	0.0913711			AQP8	0.0815863							LDLRAD3	0.084552		AP000344.3	0.0756566
				BHLHA15	0.0913567			CLDN14	0.08154							C3AR1	0.0845026		SGSM1	0.0754902
				RGS16	0.0912606			MS4A12	0.0815176							MACROD1	0.0844594		S100A9	0.0754482
				FAM161B	0.0910675			CD300E	0.0814835							CYR61	0.0840052		WNT4	0.0753708
				GLDN	0.0909302			KRT1	0.0813963							MMP28	0.0837549		C4BPA	0.0745285
				ANKDD1B	0.0909263			REG1A	0.0812195							RETNLB	0.0834409		IFIT3	0.0742904
				TNFRSF6B	0.0905129			SYP	0.0812053							BATF2	0.082906		LAMA3	0.0741361
				PPARG	0.0903955			SNAI1	0.0811364							CAMK2N1	0.0827101		TM4SF20	0.0741123
				CCL4L2	0.090217			TACSTD2	0.0811356							EVA1A	0.0826301		TMEM63C	0.0740465
				SCGN	0.0902054			OVOL2	0.0810105							FAM101A	0.0824546		PIGZ	0.0740441
				PMEPA1	0.0898806			CARD17	0.0808684							MROH7	0.0820737		SPIB	0.0737473
				TCN1	0.0898611			RP11.286O1.1	0.0808261							TGFB3	0.0818944		MNX1	0.0732696
				FLT1	0.0896319			LINC00345	0.0805669							PGF	0.0816284		WBSCR27	0.0732536
				SP6	0.0896086			IDO1	0.0804125							C6orf136	0.0816111		CYR61	0.0731668
				KRT1	0.089546			FSIP1	0.0803035							CRIP3	0.0814373		CH507.513H4.6	0.0730719
				FAM101A	0.0894133			DUOXA2	0.0802652							SAA4	0.0814246		ALPI	0.0730674
				CXCL2	0.0892866			HS3ST2	0.0801794							TRPM5	0.0812859		AGPAT4	0.0729828
				PRSS1	0.0890952			ADH1C	0.0801691							GNLY	0.0812294		RP11.96D1.11	0.07294
				KRT17	0.0890488			SLC11A1	0.0799371							ADAMTS14	0.0811823		DIO3OS	0.0726729
				RMDN2	0.0889397			FAM101A	0.0798919							DDC	0.0810549		CH507.513H4.3	0.0726338
				ITLN1	0.0889242			NCCRP1	0.0796715							C11orf53	0.0809932		SLC9A2	0.0725684
				VMO1	0.0885994			MNX1.AS2	0.0796014							AZGP1	0.080496		GNLY	0.0725445
				KLK10	0.088582			AGT	0.0795393							MRC1	0.0799315		FEV	0.0723862
				METTL7B	0.0885592			KLF5	0.0794102							TTPA	0.0798402		KRT6B	0.0723754
				FPR1	0.0882943			CTC.441N14.2	0.0791963							ATP2C2	0.0798277		C9orf24	0.0723118
				TDRD6	0.0882264			AC021218.2	0.0790411							NEU4	0.0798225		INHBB	0.072267
				CCL3	0.0880674			MMP25	0.0789166							C1orf226	0.079747		DDC	0.0722581
				SPON2	0.0879323			DYRK3	0.0787711							PLA2G7	0.0790688		CHCHD10	0.0722484
				CCL8	0.087873			PPP1R36	0.078725							POU2F3	0.07894		RETNLB	0.0721675
				P4HA1	0.087732			KLK10	0.0786931							BCL2A1	0.0789334		C2CD4A	0.0720791
				INSC	0.0875771			RP11.514F3.5	0.0786277							CD300C	0.0789239		MACROD1	0.0719442
				OLR1	0.0875406			THY1	0.0784892							EXPH5	0.078768		FGF2	0.0718844
				GNLY	0.0870048			MT1M	0.0783711							OSR1	0.0785002		IL2RA	0.0717937
				CSF2	0.0869544			MMRN1	0.078274							PRSS2	0.0784919		IL1R2	0.0715344
				KIF5C	0.0864981			CHST15	0.0782555							LDHD	0.0782004		LINC01484	0.0714527
				CLEC4D	0.0864205			PDZK1IP1	0.0780342							KIFC3	0.0779345		NXPE1	0.0714377
				INPP5J	0.0863298			CCL8	0.0780237							FCER2	0.0778444		CD1E	0.0713832
				LGALS2	0.0862411			GLDN	0.0779815							TAGAP	0.0777986		KLK15	0.0713802
				LGR6	0.086113			RGS16	0.0777915							CFTR	0.0776107		MMP28	0.0712421
				TM4SF20	0.0860351			KB.1507C5.4	0.0772628							LYVE1	0.0775538		RP11.69I8.2	0.0710214
				SOX18	0.0859739			PLCE1	0.0772503							FABP1	0.0774686		CD300C	0.0709413
				EIF4EBP3	0.0858796			UTS2	0.0771442							PTGS2	0.0774077		RP11.806H10.4	0.0708297
				ZNF575	0.085871			B3GALT1	0.0771137							EPB41L4B	0.0773899		HRASLS2	0.070802
				C8G	0.085681			MB	0.0770966							FAM161B	0.0772792		SLC28A2	0.0707705
				DSG3	0.0856138			FPR1	0.0770602							UGT1A10	0.0772719		LYVE1	0.0706845
				SBNO2	0.0852363			IL17A	0.0768919							ZNF575	0.0771566		ACSM3	0.0702306
				DNAH17	0.085208			CH17.360D5.1	0.0767666							SERPINE2	0.0771205		BCAT1	0.0702076
				SPARC	0.0851336			KRT17	0.0766703							VPREB3	0.0770925		LDHD	0.0701316
				GPR141	0.0850786			CCL3	0.0766377							NAT2	0.0768792		CPXM1	0.0700287
				CRIP3	0.0847943			P4HA1	0.0766178							TTR	0.0766816		LINC01269	0.0698687
				VIP	0.084697			TCN1	0.0762828							ZBP1	0.0766592		C11orf53	0.0696885
				PGF	0.0844614			GPR84	0.0760755							HOXD11	0.076649		FAM101A	0.0695155
				SLC16A4	0.0844378			MROH7	0.0759844							SLC4A4	0.0764671		FABP1	0.0692947
				ERO1A	0.0843983			BHLHA15	0.075854							HIST1H2BC	0.0764398		LDLRAD3	0.0692756
				GAL	0.0843812			SLC1A3	0.0757599							PTN	0.0762263		LILRA6	0.0691566
				CD300E	0.0839375			PI15	0.0753436							NXPE4	0.0761776		TNNC1	0.0689374
				CD1E	0.0836889			PGF	0.0753321							FAM189A1	0.0758532		CFTR	0.0687731
				PROK2	0.0836143			RP11.211G23.2	0.0752211							TCL1A	0.0758437		PADI2	0.0687081
				B3GNT7	0.0835646			RP11.168F9.2	0.0752184							BATF3	0.0757833		OSR1	0.0686363
				CXCR1	0.0832156			RP11.467J12.4	0.0751182							LEXM	0.0757486		RP11.482G13.1	0.0685162
				VCAN	0.083173			LINC00520	0.0750151							ASPG	0.0755075		ADAMTS14	0.0684773
				FOSL1	0.0831339			LAMC3	0.0749995							SLC22A23	0.0749764		AZGP1	0.0683014
				C4BPB	0.0830152			ROBO4	0.0749098							PAPPA	0.0749237		CH507.513H4.4	0.0682281
				ABCG2	0.0829064			CH507.513H4.5	0.0748716							REG1B	0.0746999		RP11.19N8.4	0.0681833
				C3orf36	0.0828829			CLEC4D	0.0748237							SOWAHA	0.0745549		CD300A	0.0680791
				GJA4	0.0827081			RP11.89H19.2	0.0745562							TSPAN7	0.0745431		ALOX5	0.0680637
				DYRK3	0.0824856			TMEM132A	0.0744142							CSF2	0.0745058		CAMK2N1	0.0680575
				GAL3ST2	0.0823884			OSM	0.074314							SLC16A9	0.0744813		SAA4	0.067974
				CXCL11	0.0823371			RP11.396O20.2	0.0742809							CDH6	0.0741278		H19	0.0678185
				TMEM132A	0.0822995			CTA.384D8.31	0.0741576							USP2	0.074016		TRIM7	0.0676261
				ROBO4	0.0822561			TDO2	0.0740651							AMPH	0.0738186		B3GNT7	0.0675869
				GPT2	0.0819297			PMEPA1	0.0740033							CD1E	0.073705		MIR503HG	0.0673015
				CXCL10	0.0818716			ITGAM	0.0739574							PLEKHG6	0.0731572		LEXM	0.0672014
				CDKL1	0.0818371			SBNO2	0.0737433							WNK2	0.0731144		C3AR1	0.0671026
				C1orf226	0.0815745			TNFRSF6B	0.0737355							MMP1	0.0730274		EXPH5	0.0670494
				RNASE2	0.0812768			RP6.65G23.5	0.0736482							TWIST1	0.0728946		PTN	0.0669024
				SCNN1G	0.0812633			CRIP3	0.0736349							TACSTD2	0.0728258		NAT2	0.0668146
				SCN9A	0.0809447			C8G	0.0735384							YBX2	0.0726905		SCNN1G	0.0667542
				SLC37A2	0.080924			SNCAIP	0.073506							ERRFI1	0.0723569		MROH7	0.0666967
				PLAUR	0.0809139			GJA4	0.0735057							VIP	0.0723064		FAM161B	0.0666033
				REG1B	0.0806147			LINC01272	0.0733684							IL13RA2	0.0722051		HOXD11	0.0664568
				VWF	0.0806128			FOSL1	0.0733352							TMEM37	0.0721761		TGFB3	0.0663707
				CD177	0.0805766			PTGS2	0.0732386							ILDR1	0.0721053		FUT8.AS1	0.0661056
				GPRIN2	0.0803511			ANKDD1B	0.0731685							XDH	0.0720376		POU2F3	0.0660832
				GPR84	0.0801594			RP11.292E2.2	0.0730027							DHRS11	0.0717594		WFDC2	0.0659513
				PCDH17	0.0800107			OLR1	0.0729255							LRRK2	0.0717157		LINC00345	0.0658053
				CHAD	0.0799335			PRAC2	0.072824							EYA2	0.0716269		VPREB3	0.0652556
				DMRT2	0.0799044			TMEM220.AS1	0.0724963							HSPB7	0.0715044		C6orf136	0.0650935
				FCGR1B	0.079895			CCL4L2	0.0723544							GAREML	0.0713544		RP11.7K24.3	0.064844
				ACKR3	0.0795727			PRSS1	0.0722309							HEPACAM2	0.0712992		TCL1A	0.0646418
				CCL7	0.079487			C5AR1	0.0721481							LOXL2	0.0712978		PLEKHG6	0.0645666
				VSIG1	0.079438			CAPN13	0.0720002							CACNA2D2	0.0712123		AQP7	0.0643411
				CHST5	0.0793618			ZNF575	0.0719084							FADS1	0.0710648		TWIST1	0.0643037
				RP11.468E2.2	0.0792174			PLAU	0.0718765							MOGAT2	0.0710361		TSPAN7	0.0642371
				AP003419.11	0.0791911			TDRD6	0.0718582							MCAM	0.0709315		CDH6	0.0641293
				FPR2	0.0791506			ACKR3	0.071848							ANGPTL4	0.0708715		BATF3	0.0641222
				IL1B	0.078803			KDR	0.0717985							GLYATL1	0.0707535		S100A8	0.0640176
				CCDC3	0.0787703			FAM161B	0.0717432							SCNN1G	0.0707364		ATP2C2	0.0638104
				ZDHHC19	0.07867			VMO1	0.0716585							SULT1A2	0.0706088		UGT1A10	0.0637654
				ARNTL2	0.0785278			PAPPA	0.0715155							BNIP3	0.0705929		DPEP1	0.0636949
				FGF10	0.0784973			VIP	0.0714475							SLC16A4	0.0705692		PLA2G7	0.063544
				FNDC4	0.0781547			DNAH17	0.0714343							S100A8	0.0705458		BCL2A1	0.0634373
				FXYD1	0.0779863			GAL3ST2	0.071327							SPHK1	0.070506		BATF2	0.0632245
				CD300C	0.0779546			INSC	0.071131							OMP	0.0703565		XDH	0.0632244
				KIAA1683	0.0777076			TM4SF20	0.0710393							GPR176	0.0703413		VIP	0.0628761
				FMO5	0.0775481			SPON2	0.070904							CYS1	0.0703358		PTGS2	0.0628016
				PLAU	0.0774344			C11orf96	0.0708641							CXCL3	0.0702837		SOWAHA	0.0627348
				GNA15	0.0772104			B3GNT7	0.0707167							HIST2H2AA3	0.0701152		DUOX2	0.0626838
				SAMD13	0.0771586			CXCL2	0.0706632							GPT2	0.0699937		LRRK2	0.0625429
				PRAC2	0.0771162			RP11.216L13.19	0.0705914							SIRPB1	0.0698623		USP2	0.0623069
				OGN	0.0770623			LILRA5	0.0705441							KSR1	0.0698142		SLC22A23	0.0622402
				SUCNR1	0.0770386			ABCG2	0.0705257							GAL3ST2	0.0697677		PAPPA	0.062232
				SERPINB3	0.0769102			GPR141	0.0704981							ADGRF1	0.0697292		THSD4	0.0621257
				CHCHD10	0.0768194			EIF4EBP3	0.0704069							BHLHA15	0.0696192		TNNC2	0.0621251
				AQP9	0.076794			CXCR1	0.0702547							IL6	0.069522		RP11.211G3.2	0.0620627
				ANGPTL4	0.0767265			RP11.297L17.2	0.0700701							DISP2	0.0695009		SLC4A4	0.06205
				CDHR1	0.0767188			SP6	0.0700192							PRAC2	0.069496		ERRFI1	0.0620494
				TNFSF15	0.0766575			FLT1	0.0699923							DPEP1	0.0694802		LILRB2	0.0620157
				FIBIN	0.0766452			LINC01235	0.0698704							FPR2	0.0694655		TTPA	0.0619022
				PLEK	0.0766359			RP11.334E6.12	0.0697827							MS4A12	0.0690648		AC114730.3	0.0618885
				SLC28A3	0.0765879			FCGR1B	0.0697397							APOBEC1	0.0690339		PGF	0.0618045
				MUC12	0.0765408			C3orf36	0.0697293							IL23A	0.068985		EYA2	0.061738
				CD93	0.0763988			SLC16A4	0.0696588							ENKUR	0.0688691		CXCL3	0.061716
				C5AR1	0.0763915			PROK2	0.0695766							SLC1A3	0.0688669		C1orf226	0.0615972
				MT1F	0.0762952			ITLN1	0.0693307							CPA6	0.0688552		NEU4	0.0614403
				TGFB2	0.0762876			SPARC	0.0690901							S100A3	0.0687589		RP1.170O19.14	0.0613023
				ENPEP	0.0758234			RP11.575F12.2	0.069079							GUCA2A	0.0687185		KIFC3	0.0612059
				SUSD2	0.0757974			AP003419.11	0.0687763							TNNC2	0.0685791		HSPB7	0.0611409
				ITGAM	0.0754883			CTB.61M7.2	0.0687612							SH2D6	0.0685593		NCF2	0.0610295
				SULT2B1	0.0754395			RNASE2	0.0687035							LILRB2	0.0683794		PRSS2	0.0610101
				APOBEC1	0.0753428			SERPINB3	0.0686754							PPARGC1A	0.0683763		TACSTD2	0.0609889
				ALOX5	0.075223			FIBIN	0.0686307							PER3	0.068224		MRC1	0.060963
				MRC1	0.0751562			ZDHHC19	0.0684935							SATB2	0.0681907		AF064858.10	0.0607414
				DUOX2	0.0749844			RP11.316M1.12	0.0684856							METTL7B	0.0680026		FCER2	0.060719
				ARHGAP44	0.0749459			RP11.400K9.4	0.0682817							THSD4	0.0678674		TAGAP	0.0606428
				CSGALNACT1	0.0748838			AC114730.3	0.0682579							CHAD	0.0676908		RP11.160O5.1	0.0606122
				C6orf136	0.0747962			DSG3	0.0682064							ADIRF	0.0675286		CYP2S1	0.060578
				KCNJ8	0.0747332			RP11.20I20.4	0.0681975							TBX10	0.0674157		IL13RA2	0.0605072
				VNN3	0.0745746			PPARG	0.0681463							ZDHHC19	0.0673994		CSF2	0.0604689
				ADAMTSL1	0.074552			FCER1G	0.0681418							CHST6	0.0672742		WNK2	0.0603213
				PLD4	0.0744451			TSPO2	0.0680696							PGAP3	0.0669473		CRIP3	0.0603034
				PRLR	0.0741195			TLR4	0.068055							LGALS4	0.0668873		RP6.65G23.5	0.0602858
				DEFB1	0.0740196			SLC37A2	0.0680256							CHST15	0.0667903		SPHK1	0.0602362
				FILIP1L	0.0739073			CXCL11	0.0679645							FRMD1	0.0663441		RP11.286O1.1	0.0601175
				KLK15	0.0736776			LINC01002	0.0679496							PRSS1	0.0663357		RP11.356O9.2	0.0600483
				FEV	0.0735474			FGF10	0.0677944							CHI3L1	0.066235		ENKUR	0.0599068
				SLC35G2	0.0734726			PCAT19	0.0677855							SYT12	0.0661779		EVA1A	0.059905
				GLIS3	0.0732182			RP11.124B13.1	0.0676844							PTGIR	0.0661441		GLYATL1	0.059796
				CCDC183	0.073167			PLAUR	0.0675903							SPRY4	0.066055		MMP1	0.0597582
				CEACAM4	0.0730612			LGALS2	0.0675757							PCSK9	0.0658986		METTL7B	0.0596752
				TTR	0.0728401			MMP28	0.0675544							DUOX2	0.0658533		RP6.159A1.4	0.0593531
				RAB40B	0.072819			SOX18	0.067473							PPBP	0.065836		IL6	0.0593207
				PI3	0.0728106			ALOX5	0.0671564							CDKL1	0.0656775		HOXA11.AS	0.0591498
				FFAR2	0.0727185			GAL	0.0670862							VCAN	0.0656637		TTR	0.0590273
				WBSCR27	0.0726585			AQP9	0.0670432							CTSL	0.0655743		NXPE4	0.0587096
				SPRR3	0.0726148			KIF5C	0.0669693							BMX	0.0655051		PRAC2	0.0586595
				TCL1A	0.0723104			METTL7B	0.0668318							KLK12	0.0654929		CACNA2D2	0.0584896
				FCGR1A	0.0722422			REG1B	0.0662527							CLCA1	0.0654323		YBX2	0.0584496
				TFF2	0.0722297			DMRT2	0.0662048							LIN7A	0.0653346		EPB41L4B	0.0583932
				DOC2B	0.0722266			CDKL1	0.0661394							CYP2J2	0.0653195		AMPH	0.0583742
				TRIB3	0.0722069			KIAA1683	0.0660787							FPR1	0.0652423		FRMD1	0.0583184
				SAA4	0.0721702			CD93	0.066071							CHAC1	0.0651618		PCSK9	0.0582209
				AL365273.1	0.0721413			CHST5	0.0660561							CHST5	0.0650985		SLC16A4	0.0580681
				PLEKHN1	0.0720434			SCN9A	0.0660081							TSPO2	0.0650801		ASPG	0.0577997
				LRP8	0.0718212			C1orf226	0.0659391							EPN3	0.0650782		FPR2	0.0576163
				ZNF385D	0.0718144			CXCL10	0.0658648							FCGR1B	0.0650416		LINC00152	0.0575869
				PRODH	0.0717039			GPRIN2	0.065778							MAMDC2	0.0650375		DISP2	0.0575734
				MXI1	0.0716277			VCAN	0.0656215							LRRC4	0.0650371		LIN7A	0.0573979
				C9orf24	0.0715937			SLC35G2	0.0655708							ITGB6	0.0650362		LINC01272	0.0573782
				SERPINA3	0.0712548			MRC1	0.0655321							CYP2S1	0.0650325		KSR1	0.0572282
				PLEKHS1	0.0710762			GNLY	0.0653774							ITGA1	0.0650234		CHST15	0.0571488
				SPNS2	0.0710533			C4BPB	0.0652402							HBB	0.0649739		SLC16A9	0.0571005
				SERPINB7	0.0710007			ERO1A	0.0650786							ADM	0.064812		SERPINE2	0.0570567
				IL1RN	0.0709272			GPT2	0.0649902							PRODH	0.0645872		ITGA1	0.057039
				MMP28	0.0707106			RP11.468E2.2	0.0649326							SIGLEC9	0.0645488		ZDHHC19	0.0569874
				CBR3	0.070692			SPNS2	0.0647678							PCSK1N	0.0645187		RP13.616I3.1	0.0569715
				BCL6	0.070637			SUSD2	0.0644827							THRB	0.0643961		TEF	0.05685
				MMP12	0.0706268			VWF	0.0644676							PPP1R36	0.0643952		S100A3	0.0568479
				PLA2G7	0.0702421			LINC01123	0.0643155							HAVCR1	0.0639951		SYT12	0.0567702
				PDZK1	0.0701126			RPPH1	0.0643042							GAS1	0.0637469		PCSK1N	0.0567396
				INHBB	0.0700131			CD177	0.064238							HSD11B1	0.0637392		PTGIR	0.0567168
				TREH	0.0699738			CSGALNACT1	0.0641898							DEFB1	0.0637059		DHRS11	0.0566464
				SGK2	0.0698031			VNN3	0.0641483							SRGN	0.0637054		TBX10	0.0566372
				HAS3	0.0696564			F3	0.06406							CXCL5	0.0636863		CYP2J2	0.056598
				CXCL8	0.0694604			AC002511.3	0.0639941							SCN9A	0.0635767		REG1B	0.0564948
				CYP2J2	0.0694418			CCDC3	0.0639627							TEF	0.0633848		HIST1H2BC	0.056385
				CYP4F12	0.0693394			PLA2G7	0.0639269							LYPD5	0.0633829		SIRPB1	0.0563508
				NRARP	0.0691767			RP1.170O19.14	0.0638226							GAL3ST1	0.0632686		GAREML	0.0563408
				IHH	0.069066			IL1B	0.0637478							SCGB2A1	0.0632564		OMP	0.0563193
				ADAMTS4	0.0688463			CD1E	0.0636496							PTAFR	0.0632381		MS4A12	0.056147
				SELE	0.0688344			SGK2	0.0633852							NFE2	0.0631938		KLK12	0.0560143
				KLK3	0.0688334			RP11.33O4.1	0.0633356							FCGR1A	0.063178		ERVH.1	0.0559831
				IL7R	0.0687264			DRAIC	0.0630538							MTRNR2L1	0.0629899		CHST6	0.0559785
				TAGAP	0.0686495			RP11.44K6.4	0.0629608							HOXD13	0.0627327		FCGR2A	0.0559206
				LILRA1	0.0686004			TREH	0.0628776							TNIP3	0.0626954		LRRC31	0.0559059
				TRABD2A	0.0684598			PRLR	0.0628383							SOX8	0.0626498		SULT1A2	0.0558255
				FCN1	0.0683485			AC034220.3	0.0627232							EPHX2	0.0626244		GAL3ST2	0.0558214
				LHX6	0.0682986			FAM25C	0.0626943							IL1RAP	0.0625955		ILDR1	0.0558166
				GUCA2B	0.0681632			ARNTL2	0.0625938							NOS3	0.062417		CPA6	0.0557913
				SLC7A5	0.0680704			VSIG1	0.0625895							NLRC4	0.0624023		LINC01224	0.0557898
				IFNG	0.0680557			MUC12	0.0625268							PLEKHS1	0.0623689		CYS1	0.0557561
				SATB2	0.0680508			ATP2C2	0.0625096							CEMP1	0.0622097		FCGR1A	0.0557428
				DUSP4	0.0680039			PLEKHS1	0.0624205							MMP12	0.0621824		SH2D6	0.0556686
				MCEMP1	0.067624			FPR2	0.0621504							RNASE1	0.0621468		AC116366.5	0.055645
				UGT2B17	0.0675718			LINC00152	0.0621156							MUC12	0.062087		MOGAT2	0.055628
				DISP2	0.0672257			CDHR1	0.0621027							SLC30A10	0.0620217		FAM189A1	0.0554648
				ATP2C2	0.0671893			SLC28A3	0.0620468							HOXD9	0.0619863		LOXL2	0.0554492
				ART3	0.0671269			SPRR3	0.0618356							PNPLA7	0.0618218		ZNF575	0.0553858
				ACADS	0.0669867			SLC35G1	0.0618139							AL365273.1	0.0618207		MCAM	0.0553777
				GLT1D1	0.0669531			RP11.367G18.1	0.0617758							IFNG	0.0617618		BCL6	0.0553086
				HIST2H2AA3	0.0669362			RP11.356O9.2	0.0615224							REG1A	0.0617214		ADM	0.0552256
				LDLRAD3	0.0668717			LINC01269	0.0614578							RGS16	0.0615835		DEFB1	0.0551392
				DPP10	0.0668167			FCGR1A	0.0614538							ZBTB7C	0.0615711		HIST2H2AA3	0.0551081
				F3	0.0667958			KCNJ8	0.0614137							CYP26B1	0.061568		SPRY4	0.0550806
				WNK2	0.0667709			FNDC4	0.0614086							PHGDH	0.061535		ITGB6	0.0550431
				TCEA3	0.0667626			FXYD1	0.0612883							ETHE1	0.0614876		VCAN	0.0550201
				FAM132B	0.0666757			CXCL8	0.0611812							TRIB3	0.0614561		BMX	0.0549971
				FAM25C	0.0666546			LHX6	0.0611304							ARHGAP23	0.0613676		CDKL1	0.0549391
				MYO1A	0.066597			ADAMTSL1	0.0611051							GPX8	0.0612555		HBB	0.0548743
				SRD5A3	0.0665929			RMDN2	0.0610658							CA9	0.0612296		RP13.152O15.5	0.0547771
				GAL3ST1	0.0665799			SH3PXD2A.AS1	0.0608826							FBN1	0.0611888		NOS3	0.05463
				SLC35G1	0.0665571			GNA15	0.0607701							SIGLEC14	0.0611777		RP11.223C24.1	0.0545534
				LMCD1	0.0664334			RP11.19N8.4	0.0607638							ENPEP	0.0610522		SCN9A	0.0545178
				TNNC1	0.0664077			CCL7	0.0606388							CTD.2369P2.12	0.06098		CTB.31N19.3	0.0545019
				RHOU	0.0662563			RP11.321G12.1	0.0606221							CLEC4D	0.0609761		IL23A	0.0544735
				ANGPTL2	0.0662324			C6orf136	0.0605727							HK3	0.0609582		SCGB2A1	0.0544238
				OLFM4	0.0662143			CYP4F12	0.060477							COL7A1	0.0608815		ARHGAP23	0.0544191
				MTCL1	0.066104			SAMD13	0.0600313							LRRC31	0.0607716		PPP1R36	0.0544081
				ITGAX	0.0660803			CHCHD10	0.0597721							HSD11B2	0.0607113		HAVCR1	0.054293
				CLCA1	0.0660371			GLT1D1	0.0597617							NCF2	0.0606845		ST3GAL4.AS1	0.0542726
				GUCA2A	0.0659513			ZNF385D	0.0597474							SPRR2A	0.0605964		GUCA2A	0.0541738
				FAM151A	0.0659349			SULT2B1	0.0594215							GPR84	0.0604853		CLCA1	0.0541594
				TSPAN7	0.0659349			TGFB2	0.0593122							MCEMP1	0.060472		SATB2	0.0541219
				OR51E2	0.0659102			FMO5	0.0592702							STEAP4	0.0604571		RGS16	0.0540411
				CA9	0.0657916			DUOX2	0.0592643							RNF24	0.060443		PTAFR	0.0539651
				COL8A1	0.0657488			PCDH17	0.0591549							PROK2	0.0602635		CHST5	0.0539226
				SLC30A10	0.0656561			ANGPTL4	0.0591062							BCL6	0.0602586		FPR1	0.0538988
				SLC26A3	0.0654993			ACADS	0.0590818							FCGR2A	0.0602073		PER3	0.0538255
				SLC51B	0.0654071			IFNG	0.0590788							ANXA1	0.0601242		TMEM37	0.0537789
				TTC9	0.0653988			MT1F	0.0590169							SAA1	0.0600283		HEPACAM2	0.0537723
				AKAP7	0.0653529			SERPINA3	0.05901							CXCL9	0.0599942		GPT2	0.0536818
				SEMA4G	0.0653498			RP13.152O15.5	0.0589881							CLDN8	0.0598771		RP11.1029J19.5	0.0536574
				CTD.2192J16.22	0.065255			SUCNR1	0.0588415							HP	0.0597666		MMP12	0.053577
				PHLDA1	0.0652131			APOBEC1	0.058716							CDHR1	0.0596107		CHAC1	0.0535685
				IL2RA	0.0651665			MXI1	0.0586681							VNN3	0.0595827		AC114730.5	0.0535506
				LYVE1	0.0651664			PLD4	0.0585807							TMEM132A	0.0595297		FCGR1B	0.0535235
				CST7	0.0650014			ARHGAP44	0.05857							F2R	0.0594792		ZBP1	0.0534236
				PPARGC1A	0.064972			CCDC183	0.0584612							CCL4	0.0594264		HSD11B1	0.0533752
				PRSS2	0.06485			LGR6	0.0582953							NNMT	0.0592263		PRODH	0.0533234
				SERPINB5	0.0648363			REP15	0.0582465							S1PR3	0.0591037		ANGPTL4	0.0532438
				LILRB2	0.0648214			TAGAP	0.058212							SERPINE1	0.0590814		FADS1	0.0530666
				UGT2A3	0.0647701			ENPEP	0.0581094							FAM151A	0.0590272		SLC1A3	0.052992
				SPIB	0.0647591			KLK15	0.0580699							SLC37A2	0.058849		COL7A1	0.0528774
				THSD4	0.064621			PDZK1	0.0580251							S100A12	0.0587435		PGAP3	0.0528096
				FAM83A	0.0644965			MMP12	0.0580249							C17orf107	0.0587402		IGFBP5	0.052771
				BTBD19	0.0643434			FEV	0.0580043							C4BPB	0.0586369		RP11.16E12.2	0.0527649
				ABCA12	0.0642023			PLEKHN1	0.0579287							KLK10	0.0584901		RP11.439L18.2	0.0527347
				SULT1A2	0.0640973			CD300C	0.0578537							UNC5CL	0.058471		NFE2	0.0527121
				TFCP2L1	0.0639992			TFF2	0.0578498							FGR	0.0583827		ENPEP	0.0525738
				GJC1	0.0639752			NOVA1.AS1	0.0577798							CCDC71L	0.0582886		CYP26B1	0.0525582
				REP15	0.0638244			HIST2H2AA3	0.0577756							SH2D7	0.0582252		RNASE1	0.0525505
				GAS1	0.0637957			KLK3	0.0576355							IDO1	0.05817		G0S2	0.0525331
				TTLL6	0.0636577			PLEK	0.0575715							ESM1	0.0581276		TNFRSF12A	0.0523226
				MNX1	0.0635875			RHOU	0.0575052							PGLYRP1	0.0580807		PRSS1	0.0522922
				SERPINB4	0.0635301			FFAR2	0.0574916							C11orf96	0.057797		CA9	0.052189
				FGFR2	0.0634869			IHH	0.0574024							PHGR1	0.0577275		STEAP4	0.0520074
				WFDC2	0.0634485			SATB2	0.0573906							CTD.2192J16.22	0.0575467		SLC30A10	0.0519682
				RAPGEFL1	0.0634174			ART3	0.0573882							CAPN13	0.0575303		C4BPB	0.0518863
				ACSL1	0.0634029			RP11.627G23.1	0.0572328							PRR15	0.0575048		LYPD5	0.0518541
				SAA2	0.0633674			CHAD	0.0572259							FCGR3B	0.0571716		ADGRF1	0.0518119
				ACVR1C	0.0632907			OGN	0.0570016							AMACR	0.0571214		CH17.360D5.1	0.0517944
				RP11.407N17.3	0.0632184			UGT2A3	0.0568124							GJA5	0.0570927		PLEKHS1	0.0517443
				SLC22A5	0.0631462			MCEMP1	0.0566764							CLYBL	0.0570275		THRB	0.0516894
				KCNJ15	0.0630487			RP11.223I10.1	0.0566436							TMEM56	0.0569799		SIGLEC9	0.051676
				AQP7	0.0630379			LRP8	0.056628							CD55	0.0569335		AF127577.10	0.0515289
				SLC22A23	0.0630173			DEFB1	0.0565334							TFAP2C	0.0568474		KLK10	0.0515227
				SLC7A11	0.0629624			TCL1A	0.0564876							IL7R	0.0567966		NOVA1.AS1	0.0515195
				KLK12	0.0629278			AC006126.4	0.056405							CCL8	0.056668		BNIP3	0.0515015
				PER3	0.0628714			SCNN1G	0.0563059							ROBO4	0.0565012		SRGN	0.0514959
				AMACR	0.0627684			PI3	0.0562415							SOCS1	0.0564787		RP11.380P13.1	0.0513924
				DUSP14	0.0627586			SULT1A2	0.0561821							IGFBP5	0.0564169		SIGLEC14	0.0513608
				PNPLA7	0.0627229			MIR503HG	0.0561334							IL11	0.0563668		CAPN13	0.0513322
				CA2	0.0627045			FAM3D.AS1	0.0560974							FAM25G	0.0563098		RP1.261G23.7	0.051289
				TNFRSF12A	0.062608			TNFSF15	0.0559472							SSTR1	0.0563061		MAMDC2	0.0512715
				TMEM171	0.0624554			FCN1	0.0559277							RP11.468E2.2	0.0562879		PPBP	0.0511688
				EGR3	0.0623351			DPP10	0.0557898							SFRP2	0.056245		ESM1	0.0511343
				TRPM5	0.0622116			RP11.513I15.6	0.0557704							ART3	0.0562246		PHGDH	0.0510408
				GPX8	0.062191			AL365273.1	0.0557364							TENM4	0.0561866		RMRP	0.0510192
				LPAR3	0.0621347			RP11.881L2.1	0.0556876							TNFRSF12A	0.0561485		CHI3L1	0.051018
				COL5A3	0.0620487			C9orf24	0.0556599							VNN2	0.056086		APOBEC1	0.0510096
				RNASE1	0.0620444			KLK12	0.0556261							CA2	0.0560599		AC005944.2	0.0509697
				SFRP2	0.0619337			DIO3OS	0.0555538							TFF2	0.0558755		HSD11B2	0.0508594
				KRT7	0.061925			CTC.297N7.9	0.0554622							PRRX2	0.0556816		F2R	0.050853
				CD300A	0.0618326			PPARGC1A	0.0553918							CRYBA2	0.0556783		MTRNR2L1	0.0508333
				CA4	0.0615896			TCEA3	0.055382							C8orf4	0.05555		FAM3B	0.0507826
				SLC2A3	0.0613458			RP11.386G11.10	0.0553474							SHH	0.0555162		PPARGC1A	0.0507814
				COL12A1	0.0612422			SLC30A10	0.055303							FIBIN	0.0554155		RP11.627G23.1	0.050742
				DPEP1	0.0612313			SRD5A3	0.055278							CMTM2	0.0553456		CLEC4D	0.0507353
				CCL2	0.0610435			CMTM2	0.0552371							AKR1C2	0.0553325		BHLHA15	0.0506693
				LILRB4	0.0610202			ENHO	0.0552142							TMPRSS6	0.0552311		RP1.134E15.3	0.0506604
				SOX8	0.0610136			DOC2B	0.055188							CYP4F12	0.0551656		RP11.74E22.3	0.0506393
				RGS4	0.0609847			CEACAM4	0.05518							ERO1A	0.0551436		IDO1	0.050633
				CMTM2	0.0609263			SEMA4G	0.0551185							RAI14	0.0551185		MNX1.AS2	0.0506192
				GCG	0.0608179			CLCA1	0.0550968							AIFM3	0.0551104		IFNG	0.0505925
				PADI4	0.0607957			MTCL1	0.0550857							FAM20A	0.0551033		LRRC4	0.050589
				S100A2	0.0607859			FAM83A	0.055022							HRH2	0.0550822		GPR176	0.0505599
				CLDN2	0.0607842			CTD.2334D19.1	0.0549895							AP003419.11	0.0548582		RP11.357P18.2	0.0503079
				F2R	0.0607309			SERPINB5	0.0549608							TMEM72	0.054855		CXCL5	0.05026
				IL11	0.0606932			AKAP7	0.0549492							RASD1	0.0548073		S100A12	0.0502329
				CLDN23	0.0606774			FILIP1L	0.0549391							CEACAM7	0.0548009		CEACAM7	0.0502043
				VSIG2	0.0606553			SLC51B	0.0548109							ADH1C	0.0547791		RP11.514F3.5	0.0501887
				CREB5	0.0605465			RP11.160O5.1	0.0547956							FAM25C	0.0547674		GAL3ST1	0.050084
				XKR9	0.0605382			UGT2B17	0.0547877							CCL7	0.0547525		HOXD9	0.0499616
				RSPO3	0.0602649			RP11.747D18.1	0.0547578							SLC4A11	0.054752		SLC37A2	0.0499511
				PTGIR	0.0601939			PTGIR	0.0546868							TMEM71	0.0547258		NLRC4	0.0498146
				MFSD4	0.0601368			RP11.74E22.3	0.054654							FAM3B	0.0546497		PRR15	0.0498074
				CFTR	0.0599856			ADAMTS4	0.054633							CHST2	0.0546473		PROK2	0.0497614
				GREM1	0.0598428			TUBAL3	0.0546308							PADI4	0.0545467		GAS1	0.0497163
				TUBAL3	0.0597893			LOXL2	0.0545842							SCGN	0.0544951		ADAMTSL1	0.0496581
				FAM162A	0.0597875			ABCA12	0.0545666							PDZK1IP1	0.0543676		MUC12	0.0496251
				UGT2B15	0.059654			RP11.536O18.1	0.0544486							KLK1	0.0543341		SH2D7	0.0495221
				LOXL2	0.0596406			NRARP	0.0543744							S100A2	0.0542529		SERPINE1	0.0493195
				GSTA1	0.0595625			TRIB3	0.05436							SLC51B	0.0541055		C11orf96	0.0492958
				CLYBL	0.0595565			CBR3	0.054283							TNFAIP6	0.0540585		HK3	0.0492267
				RP11.77K12.7	0.0592303			ST3GAL1	0.0542334							EIF4EBP3	0.0540265		AC002511.3	0.0490665
				AGPAT4	0.0592015			GAL3ST1	0.0541841							ITGAM	0.0539849		VNN3	0.0490581
				MNDA	0.0591893			AC002398.12	0.0541113							IL22	0.0539343		EPHX2	0.0489996
				NOS3	0.0591701			SLC7A5	0.0539173							G0S2	0.0539314		ERO1A	0.0488804
				PYY	0.0591006			BCL6	0.0538752							NPY4R	0.0539004		PNPLA7	0.0488689
				RNF24	0.0589502			OR51E2	0.0538525							CDC42EP2	0.0538959		C8orf4	0.0488417
				MUC5AC	0.0589475			TNFRSF12A	0.053836							CCDC183	0.0538322		MCEMP1	0.0488121
				ACKR4	0.0587975			WBSCR27	0.0538123							KLK4	0.053822		GPR84	0.0487895
				PHLPP2	0.0587507			COL4A2	0.0537677							CTSB	0.0538099		TMPRSS6	0.0487105
				ADAMTS9	0.0587494			TTC9	0.0537177							HMGCS2	0.0537655		EPN3	0.0487065
				CHST2	0.058738			RP11.7K24.3	0.053686							KRT6A	0.0537564		RP11.334E6.12	0.0486598
				ENHO	0.0585767			GLIS3	0.053642							PMEPA1	0.0537438		TRIB3	0.0486159
				TNNC2	0.0585415			PHLDA1	0.0535991							C7orf31	0.0537184		FCGR3B	0.048532
				NTRK2	0.0585191			S100A8	0.0535394							MMP3	0.0536487		LGALS4	0.0485126
				OSCAR	0.0585177			MYO1A	0.0534479							HBA1	0.0536397		RP11.283G6.4	0.0485026
				TMEM63C	0.0585025			MNX1	0.0534301							FILIP1L	0.0535149		RP11.1029J19.4	0.0484634
				GBP5	0.0584669			WFDC2	0.0533871							LAMC2	0.053418		TNFAIP6	0.0484482
				ST3GAL1	0.0584475			DISP2	0.0532762							MMP10	0.0533915		HOXD13	0.048374
				CES2	0.0583602			PRSS2	0.0532745							STS	0.0533577		RP13.497K6.1	0.0483612
				LILRB3	0.0583243			DUSP4	0.0532537							OR51E2	0.0533293		CTSL	0.0483522
				SIGLEC14	0.0582404			CST7	0.0532382							TMEM236	0.0532898		CTD.2555C10.3	0.0483059
				ITLN2	0.0582368			DHRS11	0.0532355							SLC6A14	0.0530161		CCDC71L	0.048274
				HNF1B	0.058221			RP11.275I4.2	0.0532316							RGS4	0.052688		SOCS1	0.0481718
				HRCT1	0.0582095			OLFM4	0.0532213							TLR4	0.0525905		SATB2.AS1	0.0481101
				GLOD5	0.0581912			CD300A	0.0531814							CXCL11	0.0525056		CTD.2369P2.12	0.0481097
				TMEM71	0.0581536			PRODH	0.0530995							CLDN2	0.0524299		LAMC2	0.0480025
				ZBTB7C	0.0581288			RAPGEFL1	0.0529981							TMEM98	0.052422		IL11	0.0479904
				SMOX	0.0581173			TTR	0.0529635							ADAMTSL1	0.0523784		CCL7	0.0479853
				CYP27B1	0.0580492			RP11.77K12.7	0.0527893							PI3	0.0523109		NNMT	0.0478897
				APOL1	0.0580224			RP13.1016M1.2	0.0526812							KRT17	0.0521271		CHST2	0.0478443
				HCAR2	0.0580128			CLDN2	0.0526611							FCGR3A	0.0521126		DDR1.AS1	0.0478241
				HOMER1	0.0580016			LINC01503	0.0526547							THBD	0.0520143		SPRR2A	0.0478173
				TWIST1	0.05795			CES2	0.0526216							KYNU	0.0519679		REG1A	0.0477173
				ZG16	0.0579451			FAM162A	0.0525233							MMP7	0.0519578		AC002398.12	0.0477027
				PERM1	0.0578225			ANGPTL2	0.0525069							RNF183	0.0519265		CEMP1	0.0476981
				UGT1A10	0.0578092			DPEP1	0.0525033							SERPINB5	0.0518282		RP11.79H23.3	0.0476548
				SELENBP1	0.0577825			SAA4	0.0524053							TDO2	0.0516982		PGLYRP1	0.0476028
				CHI3L1	0.0577175			SLC26A3	0.0524017							LPAR3	0.0516898		TMEM72	0.0474524
				AKR1C2	0.0577063			CH507.513H4.4	0.0523837							ACSL4	0.051677		ADIRF	0.0474202
				CCL4	0.0577012			RP11.118B18.2	0.0523712							SERPINA3	0.051648		RP11.297D21.2	0.0473883
				TMCC3	0.0576746			BTBD19	0.0523508							RRM2	0.0514725		RP11.589M4.1	0.0473526
				FAM65C	0.0576206			GCG	0.0522882							ABHD12B	0.0513058		TLR4	0.0473385
				COL4A2	0.0575807			RP1.193H18.2	0.0522776							PLA2G3	0.0511879		SOX8	0.0472952
				UGT1A8	0.0575231			LDLRAD3	0.0522675							SRPX2	0.051032		RGS4	0.0472304
				FCGR3A	0.0575202			PYY	0.0522349							KIAA1683	0.0509433		RP11.290L1.3	0.0471911
				CDC42EP2	0.057512			CTD.2192J16.22	0.0521861							TCN1	0.0508533		RP11.513I15.6	0.0471869
				CACNA2D2	0.0573235			WNK2	0.0521411							MEDAG	0.0508192		GJA5	0.0471004
				LYPD8	0.057296			FAM132B	0.052051							CDX2	0.0507985		CTA.384D8.31	0.0470217
				ADIRF	0.0572316			RP11.595B24.2	0.0520068							CR1	0.0507672		PHGR1	0.0469322
				CEACAM7	0.0571786			CA2	0.0519361							FGFR2	0.0506084		ZBTB7C	0.0468782
				MRGPRF	0.0571586			LPAR3	0.051887							ZNF385D	0.0506038		HRH2	0.0468765
				TBX10	0.0570511			ITGAX	0.0518305							DNAH17	0.0505651		RP5.965G21.4	0.0468292
				KRT80	0.0569143			SERPINB7	0.0516962							ABCA12	0.0505272		RNF24	0.0468109
				YBX2	0.0568243			MUC5AC	0.0516886							PXDN	0.0505105		GPX8	0.0465609
				IRAK3	0.0567786			COL8A1	0.0515998							LAX1	0.0504558		RASD1	0.0465556
				CNTN3	0.0566854			RNASE1	0.0515973							SLC28A3	0.0503392		FBN1	0.0465217
				TMIGD1	0.0566077			AC011523.2	0.0515722							NRARP	0.0503157		CYP4F12	0.0464621
				ADAMTS2	0.0565145			SLC7A11	0.0515477							CARD17	0.0502687		KRT6A	0.0463854
				TMEM212	0.056373			COL5A3	0.0515046							CEBPB	0.0502631		RP11.400K9.4	0.0463734
				CSF3	0.0563342			SATB2.AS1	0.0514474							DMRT2	0.0501834		SCGN	0.0463582
				SCGB2A1	0.0562932			RP11.542M13.2	0.0514325							HOXB9	0.0501716		PCAT19	0.0462596
				CCL23	0.0562433			HAS3	0.0514038							TFPI	0.0501344		TENM4	0.0462005
				MASP1	0.0561719			RP11.1029J19.4	0.0513355							TMEM158	0.050114		IL7R	0.0461623
				FGFR3	0.0561154			FAM20C	0.0513149							LRRC19	0.0500777		RP11.575F12.2	0.0461446
				SULT1C2	0.0560488			ACSL1	0.0512316							PI15	0.0499962		TSPO2	0.0461065
				TPRG1	0.0560012			IL7R	0.0511668							CEMIP	0.0499822		PADI4	0.046054
				CLEC12A	0.0559227			AQP7	0.0511444							GUCY1A3	0.0497804		SLC51B	0.045983
				MYEOV	0.055832			DUSP14	0.0511388							PDPN	0.0497612		RP3.406A7.7	0.0459581
				TEF	0.0557952			TRABD2A	0.0511117							ENHO	0.049691		AL365273.1	0.0459529
				SLC9A2	0.0556921			TST	0.0510714							PLEKHN1	0.0496743		IL1RAP	0.045879
				RASSF10	0.0556591			NOS3	0.0510382							TLR2	0.0496476		TFAP2C	0.0458532
				TEX43	0.055603			RP1.261G23.7	0.0510036							CLEC12A	0.0496028		CD55	0.0458524
				CTD.2369P2.12	0.0555901			CA9	0.05095							NID1	0.0495497		ITGAM	0.0458394
				ACSM3	0.0555901			ADAMTS9	0.0509117							TM4SF5	0.0494531		SAA1	0.0457506
				SIRPB1	0.0555131			RP11.63M22.2	0.0507316							RBM24	0.0494431		RP11.89H19.2	0.0457405
				PDCD4	0.055445			ADGRE3	0.050701							B3GNT8	0.0492628		HMGCS2	0.0457246
				GPR20	0.0554283			ACVR1C	0.0506961							IGF2BP3	0.0492143		ROBO4	0.0456866
				KLK1	0.0553961			RP11.1070N10.3	0.0506697							INSL5	0.0492069		AKR1C2	0.0456682
				GUCY1A3	0.0553808			HMGCS2	0.0505794							TNFSF15	0.0491303		CMTM2	0.0456627
				TST	0.0553503			RAB40B	0.0505666							SMOC1	0.0491262		SERPINB5	0.0456118
				INSL5	0.0553013			SLC22A5	0.0505347							WNT5A	0.0489875		RNF183	0.045583
				HP	0.0553006			GPX8	0.0505045							ITGB3	0.0489758		AMACR	0.0455826
				DHRS11	0.0552566			GUCA2B	0.0504974							CD274	0.0489514		TFF2	0.0455383
				REG4	0.0552546			HCAR2	0.0503906							CXCL17	0.0487952		CHAD	0.0455072
				GALNT14	0.0552484			SELE	0.0503738							COL18A1	0.048765		FGR	0.0454171
				ITPKA	0.0552356			INHBB	0.0503528							COL5A1	0.0487008		RP11.77K12.10	0.0453176
				FOXQ1	0.0552219			GLOD5	0.0503105							PPARG	0.0485498		FIBIN	0.0452992
				GCA	0.0551978			SPIB	0.0502128							HOMER1	0.0485246		KLK1	0.0452967
				ADGRE3	0.0551662			SAA2	0.0501711							MASP1	0.0484803		FAM20A	0.045285
				CXCL6	0.0550959			SFRP2	0.0500246							NTRK2	0.0484731		CLYBL	0.0451928
				TMPRSS6	0.0549361			AP000344.3	0.0499979							CNTN3	0.0483936		HOXB9	0.0451181
				ARHGAP23	0.054865			ZMYND15	0.0499941							REG4	0.0483825		FAM25G	0.0451138
				RGL4	0.0546699			AF064858.10	0.0499897							OGN	0.0483707		AC034220.3	0.0450952
				OMP	0.054518			IL2RA	0.0499613							NRCAM	0.0482985		TNIP3	0.0450661
				IGSF6	0.0544684			ZG16	0.0499399							REP15	0.0482908		CRYBA2	0.0450272
				TFPI	0.0543566			GREM1	0.0499349							COL4A2	0.0482602		IL22	0.0450268
				GK	0.0543345			LILRA1	0.0499304							LAMC3	0.0481013		TMEM132A	0.0450004
				HMGCS2	0.0542977			RP11.24F11.2	0.0498714							DIO2	0.0480702		CA2	0.0449963
				FAM20C	0.0542429			LINC00238	0.0498546							GALNT14	0.047857		CDC42EP2	0.0449132
				ITGA1	0.0542094			UGT2B15	0.0498516							ELL3	0.0478134		C7orf31	0.0447831
				CYS1	0.0541986			GJC1	0.0497876							KIF5C	0.0477599		DIO2	0.0447567
				HOXB13	0.0541625			RP11.67C2.2	0.0497692							HRCT1	0.0477508		RP11.118B18.2	0.0447304
				COX6B2	0.0541532			ACKR4	0.049766							GPRIN2	0.0477392		S1PR3	0.0446857
				HK3	0.0540967			SMOX	0.0497531							BTBD19	0.0476641		TMEM98	0.0446024
				STS	0.0540653			WISP1	0.0497527							ACKR3	0.0475877		CCDC183	0.04456
				TNC	0.0540545			TMCC3	0.0497236							LRRN2	0.0475866		ETHE1	0.044516
				TTPA	0.0540322			NTRK2	0.0496158							RNASE2	0.0474386		FAM151A	0.0444233
				CKB	0.0539381			PDZD3	0.0496004							CSGALNACT1	0.0474085		MMP7	0.0443803
				IL24	0.053749			KRT7	0.049531							SOCS3	0.0473619		MMP10	0.0442785
				LRRC4	0.0536941			CH507.513H4.6	0.0494382							TNFRSF10C	0.0473208		ANXA1	0.0441003
				CLEC4A	0.0536894			RP13.497K6.1	0.0494354							VWF	0.0472507		PRRX2	0.0440002
				F5	0.0536819			CHI3L1	0.0493863							DPF3	0.0472356		SLC6A14	0.0439995
				FCER2	0.0536024			SLC2A3	0.0493286							TREM1	0.0471889		RP11.61A14.1	0.0439562
				CYR61	0.0535519			RP11.407N17.3	0.0492861							THBS2	0.0471298		STS	0.0439238
				KRT6A	0.0535208			FGFR2	0.0492782							F2RL2	0.0471001		FILIP1L	0.0438552
				SGIP1	0.0534948			APOL1	0.0492352							SAA2.SAA4	0.0470931		CLDN2	0.0438036
				OSR1	0.0534272			CYR61	0.0492132							C2orf82	0.0470643		UNC5CL	0.0437247
				TMEM56	0.0533344			TFCP2L1	0.0491555							RXFP4	0.04694		CNTN3	0.0436553
				FAM20A	0.0532446			FAM151A	0.0491545							AQP9	0.0468989		SRPX2	0.0436071
				LEFTY2	0.053237			PER3	0.0491248							ALPL	0.0468977		CXCL9	0.0435389
				MEDAG	0.0531177			HNF1B	0.0491198							SLC35G1	0.0468751		SHH	0.043412
				CXCR2	0.0530947			S100A2	0.0490972							GAL	0.0468559		AC007192.6	0.0433189
				SLCO4A1	0.0530683			TRPM5	0.0489759							LHX6	0.0467681		LRRC19	0.0432747
				LILRB1	0.0530488			PDGFB	0.0489374							HECW2	0.0467677		RP11.468E2.2	0.0432051
				CHRNA7	0.0530008			LMCD1	0.0489318							COL6A3	0.0467366		PMEPA1	0.0431081
				FADS2	0.0529663			KRT80	0.0489211							FAM65C	0.0466947		C17orf107	0.0431051
				SAA1	0.052961			CH507.513H4.3	0.0488781							FAM132B	0.0466798		RP11.627K11.6	0.0430759
				VSIG4	0.0528365			TNNC1	0.0488687							F5	0.0466407		HBA1	0.043072
				NID1	0.0527696			TPRG1	0.0488232							PKIB	0.0466214		FGFR2	0.043071
				CTD.3214H19.16	0.0527599			ZBTB7C	0.0487687							PCDH19	0.0465288		HP	0.0430536
				COL5A1	0.0527462			THSD4	0.0487502							TTC9	0.0464575		FCGR3A	0.0429525
				HOXB9	0.052739			MNDA	0.0487237							ATP13A4	0.0464198		TMEM236	0.0429495
				PPP1R1B	0.0526467			MRGPRF	0.0486454							GLIS3	0.0462791		SLC35G1	0.0429414
				REG3A	0.0526111			EGR3	0.048523							TMCC3	0.0461394		CARD17	0.0429366
				C6orf223	0.0526034			LILRB2	0.0484003							ALDH3A1	0.0460043		TMEM71	0.0428708
				PRRX2	0.0522811			TTLL6	0.048397							TPRG1	0.0459043		KLK4	0.042862
				PLXNA1	0.0522651			SCGB2A1	0.0483827							GUCA2B	0.0458733		CLDN8	0.0427061
				NOTCH3	0.0522372			CYP2J2	0.0483377							CLEC4E	0.0458444		INSL5	0.0426908
				DNAAF1	0.0521732			TMEM63C	0.0483053							CNFN	0.045839		ACSL4	0.0426585
				PKIB	0.0520841			PADI4	0.0482829							ERICH5	0.0457466		TMEM158	0.0426545
				SOCS3	0.0520772			RP11.16E12.2	0.0482131							ADGRG3	0.0457361		WISP1.OT1	0.0425952
				DEFB4B	0.0520294			ECSCR	0.0481891							BEST2	0.0456837		CASC19	0.0424378
				WNT5A	0.0520256			CLYBL	0.0481594							C2orf54	0.0456468		SSTR1	0.0423816
				WISP1	0.0520248			F2R	0.0481482							TRPA1	0.045585		FAM25C	0.0422185
				PLA2G10	0.0519624			TBX10	0.0481312							TLE2	0.04548		CTD.2566J3.1	0.0422028
				STX11	0.0518748			GAS1	0.0481294							FXYD1	0.0451921		CTC.441N14.2	0.0421847
				SLC26A2	0.0517857			SLC22A23	0.0481239							TIMP1	0.0451162		LPAR3	0.0421794
				FAM25G	0.0517768			GCA	0.0480757							RP11.407N17.3	0.0451093		B3GNT8	0.0421764
				C2orf82	0.0517536			STX11	0.0480604							MNDA	0.0447985		F2RL2	0.0421543
				LIN7A	0.0516923			TMEM56	0.0480347							HNF1B	0.0447896		OR51E2	0.0420566
				SOSTDC1	0.0516722			TMEM171	0.0478213							LIPG	0.0447563		CTD.2192J16.22	0.0420262
				PDGFB	0.0516687			KCNJ15	0.0477331							RDH5	0.0447514		RP11.316M1.12	0.0420072
				CHST6	0.0516469			COL12A1	0.0476799							FGF10	0.0446525		RP11.321G12.1	0.0419796
				SLC4A4	0.051568			TSPAN7	0.0476478							FNDC4	0.0446504		LAX1	0.0419123
				PCSK9	0.0515605			PNPLA7	0.0476428							DUSP4	0.0446498		BTBD19	0.0418762
				LDHD	0.0513712			HOMER1	0.0476323							FAM92B	0.0446404		KIAA1683	0.0417855
				PDZD3	0.0513592			TMEM71	0.047619							VSIG1	0.0446381		RP11.20I20.4	0.0417544
				S100A8	0.0513118			TNNC2	0.0475978							CLEC5A	0.0446312		SFRP2	0.0417527
				EXPH5	0.0512137			AKR1C2	0.0475397							EGFL6	0.0445424		LINC00582	0.0416148
				IFITM2	0.0511671			IL1RN	0.047406							PDLIM4	0.0445328		KYNU	0.0415583
				MT3	0.0511555			AMACR	0.0473345							EGR3	0.0444521		NPY4R	0.0415527
				PLEKHG6	0.0510751			WISP1.OT1	0.0472619							CSF3R	0.0444036		WNT5A	0.041477
				CXCL17	0.0509891			FAM157B	0.0471801							OLFM4	0.0443246		ALDH3A1	0.0413872
				KRT6B	0.0509735			CDC42EP2	0.0471663							HAS3	0.0442865		PLEKHN1	0.0413806
				IL1R2	0.0509099			FCGR3A	0.0471573							F3	0.0442782		SLC4A11	0.0413632
				CDH3	0.0508337			H19	0.0471441							KIRREL	0.0442561		CCL4	0.0413218
				VASN	0.0508061			CTB.31N19.3	0.0471252							PTGFR	0.0442039		CDHR1	0.0412626
				PADI2	0.0507415			RP13.616I3.1	0.0471153							TST	0.0441829		SAA2.SAA4	0.0412425
				S100A3	0.0506085			RNF24	0.0470514							COL8A1	0.044158		LINC00992	0.0412319
				C11orf53	0.0504535			CSF3	0.0470395							TNFRSF11B	0.0441471		PLA2G3	0.0412296
				COL7A1	0.0504296			TMEM212	0.0470388							TNFRSF6B	0.0440948		RPPH1	0.0412205
				STC1	0.0504228			VSIG2	0.047035							SNCAIP	0.0439951		TFPI	0.0411754
				NDUFA4L2	0.0504128			IRAK3	0.0469783							RASSF10	0.0439513		TREM1	0.0411523
				AOX1	0.0503358			GSTA1	0.0469411							GBP5	0.0438832		GUCA2B	0.0410613
				KIFC3	0.0503208			CREB5	0.0469202							CXCL1	0.04379		SERPINA3	0.0410428
				HEPACAM2	0.0503201			GBP5	0.0469014							CXCL2	0.0437611		AC093627.8	0.0409969
				PALM2.AKAP2	0.0502498			AGPAT4	0.0468861							ETV4	0.0437101		RP11.37L2.1	0.0409335
				STEAP4	0.0502215			RP11.96D1.11	0.0467542							STARD10	0.0436722		PCDH19	0.0408795
				PKDCC	0.0500832			CYP27B1	0.0467225							OVOL2	0.0436709		RP11.110I1.6	0.04064
				VPREB3	0.0500645			SERPINB4	0.0466573							SLC39A5	0.043613		LINC01612	0.0406379
				IL18RAP	0.0500382			SULT1C2	0.0464436							PTGDR	0.0436015		CTSB	0.0405661
				NRG1	0.0500309			UGT1A8	0.0464139							PTPRO	0.0435493		CLEC5A	0.0405423
				CHRDL2	0.0500019			CCL2	0.0463279							TCEA3	0.043539		S100A2	0.040534
				ZMYND15	0.0499827			HOXB13	0.0463195							PRR16	0.0434459		TMEM56	0.0404864
				PXDN	0.0499503			LYVE1	0.0462775							APOBEC3A	0.0432946		TLR2	0.0404722
				ALPL	0.0499471			GATA2.AS1	0.0462171							GCA	0.0432666		RXFP4	0.0404569
				TGFBI	0.0499171			ACSM3	0.046186							SPARC	0.0431191		TMEM220.AS1	0.0403686
				FJX1	0.0499167			PHLPP2	0.046043							SNAI1	0.0431172		RAI14	0.0402999
				FADS1	0.0499123			CCL4	0.0460132							XKR9	0.0430997		COL6A3	0.0402873
				KLK4	0.0499045			CXCR2	0.0458839							MMRN1	0.043052		NID1	0.0402847
				CLEC4E	0.0498495			SLC9A2	0.0458743							GPR141	0.0430474		KIF5C	0.0402795
				CDH6	0.0496866			INSL5	0.0458587							ADGRL4	0.0429591		AP003419.11	0.04021
				PLA2G3	0.0495256			LRRC4	0.0458492							CTHRC1	0.0429363		MMRN1	0.04019
				TNS4	0.0494932			STC1	0.0457837							SOX18	0.0428702		PXDN	0.0401288
				HOXD9	0.0494881			FAM20A	0.0457145							INSC	0.0425774		KRT17	0.0400815
				HCAR3	0.04944			CHST6	0.0457002							ZG16	0.0424365		ADGRG3	0.0399912
				NXPE4	0.0494037			FCER2	0.0456567							ACSF2	0.042348		CCL8	0.0399905
				PHGR1	0.0492777			SELENBP1	0.0456532							DYRK3	0.042252		SMOC1	0.039981
				TSPAN2	0.0492632			MT3	0.0455873							ANKDD1B	0.0420908		CR1	0.0399751
				THBS2	0.0492371			STEAP4	0.0455699							MGAM	0.0420908		LINC01123	0.0399647
				MEP1A	0.0491722			RASSF10	0.0455575							OTOP2	0.0420809		FAM3D.AS1	0.039946
				IL22	0.0490991			CNTN3	0.0454958							TNS4	0.0420559		AIFM3	0.0399417
				CPXM1	0.0490693			ADAMTS2	0.0454536							TSPAN2	0.0420513		THBD	0.0399235
				ECSCR	0.0490316			GPR20	0.0454171							DEFB4B	0.0419941		RP11.63M22.2	0.0399197
				TMEM236	0.0489712			COX6B2	0.0454162							MMP19	0.0419568		F5	0.0398672
				OSMR	0.048956			SOX8	0.0454006							KRT80	0.0418161		IGF2BP3	0.039818
				MAMDC2	0.0489547			REG4	0.0453958							CXCL6	0.0416152		THBS2	0.039807
				C7orf31	0.0489343			PERM1	0.0453535							SERPINB7	0.0415823		RP11.54A4.2	0.0397968
				CAMK2N1	0.0489138			HP	0.0453198							GJC1	0.0414919		ACKR3	0.0397833
				TGFB3	0.0487883			NOTCH3	0.0452612							SRD5A3	0.04147		VNN2	0.0397512
				HSPB7	0.0487745			SIGLEC14	0.0452146							IL17A	0.0414326		ZNF385D	0.0397304
				FBN1	0.0487641			CCAT1	0.0451887							COL12A1	0.04143		RP11.595B24.2	0.0397126
				KSR1	0.0485922			SGIP1	0.0451369							KLF5	0.0414106		TDO2	0.0396803
				GPR4	0.0485351			XKR9	0.0450689							CYP27B1	0.0413958		RP11.884K10.6	0.0396787
				CEBPB	0.048533			YBX2	0.0450603							PRRX1	0.0413949		FAM65C	0.0395517
				ETV4	0.0484085			RP11.380P13.1	0.0450203							KRTAP13.2	0.041301		FAM157B	0.0395481
				ELL3	0.0483604			RP11.1029J19.5	0.0450108							CLEC4A	0.0412129		TM4SF5	0.0395071
				COL18A1	0.0481884			AGAP2.AS1	0.0449933							SELENBP1	0.0412064		CD274	0.0394883
				CD163	0.0481849			RSPO3	0.0449777							FCN3	0.0411841		HRCT1	0.0392722
				COL15A1	0.0481147			ITLN2	0.0449588							STX11	0.0411186		CEBPB	0.0392511
				CLCN2	0.0480175			WNT5A	0.0448864							P4HA1	0.0410542		NRARP	0.039186
				SERPINE2	0.0477196			OSCAR	0.0448406							KCNN3	0.0409709		CXCL17	0.0391798
				SLC6A7	0.0476904			GALNT14	0.0448386							NOTCH3	0.0408319		C2orf82	0.039115
				LEXM	0.0476483			LILRB4	0.0448048							IL1R1	0.0407903		RP11.357H14.17	0.0391008
				SYT12	0.0476295			GUCA2A	0.0448025							RAB38	0.0407376		EIF4EBP3	0.039068
				SERPINE1	0.0475709			LYPD8	0.0447947							KCNJ8	0.0406049		PI3	0.0390513
				GEM	0.047502			CXCL6	0.044721							RASSF8	0.0405408		IL17A	0.0390307
				MMP19	0.0474791			HRCT1	0.0446791							CXCR1	0.0404987		TNFSF15	0.0390244
				RXFP4	0.0473527			HEPACAM2	0.0446338							PCDH17	0.0404961		FAM92B	0.0389892
				RNF183	0.0473386			ADIRF	0.0446019							MRGPRF	0.0404528		CSGALNACT1	0.0389749
				ADGRE2	0.0473326			RGS4	0.0445404							SPRR1A	0.0403782		KIRREL	0.0389674
				LILRA2	0.0472646			MASP1	0.0445339							TRABD2A	0.040316		CXCL11	0.0388806
				HTN3	0.0471897			CTD.3214H19.16	0.0443916							ACSL1	0.040245		LINC00923	0.0388316
				CYP26B1	0.0470506			RP11.61A14.1	0.0443615							PDGFB	0.0402217		STARD10	0.03882
				SAA2.SAA4	0.0470242			DEFB4B	0.0443601							ADGRE2	0.0401552		LAMC3	0.0388132
				GPR27	0.0469785			ERICH5	0.0442233							CXCL10	0.0401277		GLIS3	0.0387968
				MAOA	0.0469422			TMIGD1	0.0442229							LGR6	0.0400231		ABCA12	0.0387771
				IL23A	0.0468556			CTD.2566J3.1	0.0441836							DLC1	0.0399958		ART3	0.0387722
				TM4SF1	0.0468389			PRRX2	0.0440016							GJA4	0.0399163		ITGB3	0.0387711
				ITGA5	0.0468052			CLDN23	0.0439902							DYSF	0.0397309		MEDAG	0.0387366
				LRRK2	0.0467948			RP11.44K6.2	0.0439619							CEACAM4	0.0397225		CLEC12A	0.0386511
				PTGES	0.0467818			CFTR	0.0439524							BDH1	0.0397118		COL5A1	0.0386304
				HOXD11	0.0467167			SAA1	0.0438814							ADGRE3	0.0396984		SOCS3	0.0386034
				RASD1	0.046634			KLK4	0.04387							PLEK	0.0395181		GALNT14	0.0386006
				HOXD13	0.0465712			SRPX2	0.0437961							PLAUR	0.0395109		ALPL	0.0385817
				ISX	0.0465698			ARHGAP23	0.0437602							ADAMTS12	0.0394468		LHX6	0.038575
				BCL6B	0.0465382			TEX43	0.0437098							TNFSF9	0.0394374		GUCY1A3	0.0384748
				ATP13A4	0.0464736			GK	0.0436945							FAM20C	0.0394206		DPF3	0.0384462
				VSTM2A	0.0464636			RP11.110I1.6	0.0435507							CD93	0.0391901		RNASE2	0.0383597
				ADGRG6	0.0464479			CA4	0.0435049							ST3GAL1	0.0391852		RP11.275I4.2	0.0383473
				RGS5	0.0464305			FAM65C	0.0434635							SLC11A1	0.039127		ENHO	0.0383047
				FXYD3	0.0462425			FGFR3	0.0434369							CXCR2	0.039006		HECW2	0.0382889
				TIMP1	0.0462369			RP11.627K11.6	0.0434347							DSG3	0.0389895		NRCAM	0.0382427
				HSD11B2	0.0462047			IL11	0.0434277							MEFV	0.038953		AC021218.2	0.0381639
				PGLYRP1	0.0461639			THBS2	0.0433495							EDNRA	0.0389409		RP11.334J6.7	0.0381081
				PRRX1	0.0459749			TTPA	0.0433429							DUOXA2	0.0389321		TIMP1	0.0380817
				CSF3R	0.0459355			PLEKHG6	0.0433015							NCOA7	0.0389222		RP11.386G11.10	0.0379003
				CWH43	0.0457816			RGL4	0.043296							DOC2B	0.0388795		DMRT2	0.0378532
				NHEJ1	0.0457703			GUCY1A3	0.0431653							SLC6A20	0.0388744		TM4SF1	0.0378099
				LAMA1	0.0455829			TWIST1	0.0431187							CA1	0.0388742		MMP3	0.0378047
				BGN	0.0454017			RP11.283G6.4	0.0430856							SUCNR1	0.0388362		CNFN	0.0377402
				EGFL6	0.045397			AC116366.5	0.0430595							THY1	0.0387549		SLC28A3	0.0377369
				SRPX2	0.0452651			IL24	0.0430107							SELE	0.0386117		ADH1C	0.0377349
				MDFI	0.0452268			UGT1A10	0.042989							SPON2	0.0385867		SERPINB7	0.0375995
				EDN3	0.0451539			COL5A1	0.0429814							BCL6B	0.0385836		LUCAT1	0.0375283
				B3GNT8	0.0451395			C6orf223	0.0429777							SLC17A4	0.0385231		TPRG1	0.0373895
				SIGLEC9	0.0450858			PXDN	0.0429455							STC1	0.038521		EGFL6	0.0373241
				TMEM158	0.0450342			PCSK9	0.0428792							IFITM2	0.0384884		RAB38	0.0372994
				FGF7	0.0449484			CLEC4A	0.0426819							GBP1	0.0384753		OGN	0.0372932
				PTPRO	0.0449332			CCL23	0.0425207							TRAPPC6A	0.0384523		ERICH5	0.0372676
				CSPG4	0.0448859			RP11.589M4.1	0.0424826							RGS5	0.0384379		SNCAIP	0.0372479
				EDNRA	0.0447321			VPREB3	0.042473							CDH3	0.0384262		HOMER1	0.0372039
				CXCL9	0.0446561			NXPE4	0.042461							FOLR3	0.0384034		GPRIN2	0.0371867
				S1PR3	0.0446349			SOCS3	0.042444							TGM2	0.0383835		TRPA1	0.0371237
				SRGN	0.0445731			TNC	0.0424324							COL3A1	0.0382725		RBM24	0.0370671
				HTRA3	0.0445546			HK3	0.0423996							DNAAF1	0.0382496		SRD5A3	0.0370238
				C17orf107	0.0444584			NRG1	0.0423788							PLXNA1	0.0382059		PDZK1IP1	0.0370065
				TM4SF5	0.0443576			RP11.884K10.6	0.0422788							FXYD3	0.0381445		ACSF2	0.0369831
				TRPM6	0.0442504			HCAR3	0.0422494							PPP1R1B	0.0380715		RP11.350J20.12	0.0369605
				MMP3	0.0442106			SLCO4A1	0.0422483							NPTX2	0.0380532		AC011523.2	0.0369584
				RNF152	0.0440276			FOXQ1	0.0422287							TMTC1	0.0380105		COL18A1	0.036917
				PDPN	0.0438576			KLK1	0.0421549							GPR4	0.0379189		AP000439.3	0.03691
				RAI14	0.0438502			CSF3R	0.0421548							SMOX	0.0378884		TTC9	0.0368979
				RDH5	0.0437051			RP11.482G13.1	0.0420977							CHRNA7	0.0378865		MNDA	0.0368646
				OLFML2B	0.043618			PALM2.AKAP2	0.0420631							STOM	0.0378762		AGAP2.AS1	0.0367682
				CLDN8	0.0436079			LILRB3	0.0420607							STAP2	0.0377031		PI15	0.0366958
				PDLIM4	0.0435857			LINC01224	0.0420414							CLDN1	0.037672		ELL3	0.0366951
				FCGR2A	0.0435577			ITPKA	0.0420039							STRIP2	0.0376638		OVOL2	0.036642
				COL6A3	0.0435274			FJX1	0.0419487							DPP10	0.0375954		ABHD12B	0.0365965
				C8orf4	0.0433266			TM4SF1	0.0419275							KRT7	0.0374957		FAM132B	0.03658
				ACSF2	0.0432178			CEACAM7	0.0419111							GLDN	0.0374543		F3	0.0365404
				PTAFR	0.0431915			NID1	0.041892							CREB5	0.0374133		PPARG	0.0365173
				CALCRL	0.0430167			IL23A	0.0418698							DSE	0.0373647		GBP5	0.0365014
				ABCB1	0.0429899			EXPH5	0.0418698							COL5A3	0.0373637		C2orf54	0.0364607
				TMTC1	0.0428843			TEF	0.0418526							HCAR3	0.0373412		PRR16	0.0363981
				FAM189A1	0.0428364			PLA2G10	0.0418441							KDR	0.0373006		VWF	0.0362588
				C3AR1	0.0427995			ITGA1	0.041769							FOSL1	0.0371597		KLF5	0.0361642
				TNFSF9	0.0426701			COL15A1	0.0417529							GFPT2	0.0370059		TLE2	0.0361478
				ADAMTS12	0.0426648			SIRPB1	0.0416883							MUC5AC	0.0369637		TNFRSF6B	0.0361176
				SSTR1	0.0426268			GATA6.AS1	0.0415539							TM4SF1	0.0369391		SPARC	0.0360602
				EPHX2	0.0425146			LILRB1	0.041529							FGF7	0.0369239		BDH1	0.0359673
				C4BPA	0.0424806			REG3A	0.0413803							ACADS	0.0368971		AQP9	0.0359439
				TMEM37	0.0423313			CSPG4	0.0413117							PHLDA1	0.0368964		CTHRC1	0.035902
				RAVER2	0.0423193			MFSD4	0.0413077							NDUFA4L2	0.0368869		CSF3R	0.0358834
				SLC6A20	0.0423108			TMPRSS6	0.0412874							CDH11	0.0367134		CXCL6	0.0358608
				TENM4	0.0423019			CHST2	0.0412697							ITGA2	0.036582		MASP1	0.0358532
				ERICH5	0.0422586			S100A3	0.0412584							COL1A1	0.0364536		TCN1	0.0358004
				HAVCR1	0.0422149			SOSTDC1	0.0411444							CHP2	0.0363741		CXCL1	0.0357556
				CDX2	0.0421716			TFPI	0.0410991							LCP2	0.0362667		HOXB.AS4	0.0357464
				HAPLN3	0.0421715			PADI2	0.0410212							C11orf91	0.0360634		KRT80	0.0356819
				HSPA6	0.0421592			F5	0.0409844							COL4A1	0.0359673		DSG3	0.0356567
				COL1A1	0.0421341			RP11.54A4.2	0.0409749							RMDN2	0.0359586		LRRN2	0.0356448
				RBM24	0.0418545			HOXD9	0.0409672							SGIP1	0.0359163		HAS3	0.0355944
				RRM2	0.0417194			CTC.518B2.12	0.0408858							UBTD1	0.0358977		SH3RF3.AS1	0.0355771
				F2RL2	0.0416455			SRGN	0.0408672							CCDC152	0.0357818		RP11.538I12.2	0.03557
				BATF3	0.0416365			HOXB9	0.0408606							ADAM12	0.0357568		TCEA3	0.0354919
				THRB	0.04154			PDCD4	0.0408576							PERM1	0.0355697		VSIG1	0.0354606
				NPY4R	0.0415164			MEP1A	0.0408386							ADAMTS4	0.0355266		CXCR1	0.0354404
				CHP2	0.0414311			STS	0.0408209							SLCO4A1	0.0355075		LINC01002	0.0354109
				TMEM98	0.0411008			LEXM	0.0407973							PIM2	0.0354882		FNDC4	0.03537
				GPR176	0.0410908			AOX1	0.0407759							SLC7A11	0.035486		RP11.462G2.1	0.0353538
				CCDC71L	0.0410282			LEFTY2	0.0407548							PLAU	0.0354548		FGF10	0.0353301
				PCK1	0.0409245			TSPAN2	0.0406911							TGFB2	0.0353063		RASSF10	0.0352122
				EPB41L4B	0.0409168			SIGLEC9	0.0406805							LMCD1	0.0353031		THY1	0.0352053
				ADAM12	0.0407756			TNFSF9	0.040665							CSF3	0.035285		ADGRL4	0.0351986
				NFE2	0.0407453			MMP19	0.0405994							CD300E	0.0350962		HNF1B	0.0350446
				AMPH	0.0406683			RASSF8.AS1	0.0405516							GJA1	0.0350006		CXCL10	0.0350277
				NEU4	0.0406123			CACNA2D2	0.040453							OSM	0.0349597		TMCC3	0.0350198
				CR1	0.0405567			HSPB7	0.0403868							FOXQ1	0.0349291		RRM2	0.0350127
				PIGZ	0.0405283			SLC4A4	0.0402129							MMP25	0.0346412		GAL	0.0349969
				COL3A1	0.0405161			NDUFA4L2	0.0402121							NAMPT	0.034541		TNS4	0.0349918
				STAP2	0.0402718			C7orf31	0.0401911							CCL2	0.0345261		PTGDR	0.0349204
				CA1	0.0402238			CTD.2369P2.12	0.0401487							TDRD6	0.0344907		FXYD1	0.0348752
				SIGLEC5	0.0400411			CDH3	0.0401301							LRP8	0.0343819		TST	0.0348456
				SPOCD1	0.0397393			RP11.357P18.2	0.0401289							MDFI	0.0343421		AC006126.4	0.0347948
				KIRREL	0.0396995			FADS2	0.0401101							PALM2.AKAP2	0.0343042		KRTAP13.2	0.0347935
				RASGRP4	0.0396844			CYS1	0.0400778							GNA15	0.0342425		ATP13A4	0.0347889
				HRH2	0.0396686			MYEOV	0.0400762							CSPG4	0.0341584		DUSP4	0.034784
				ITGB3	0.0392502			CDKN2B.AS1	0.0399798							IL18RAP	0.0341526		BEST2	0.0346904
				HSD11B1	0.0391325			CA3.AS1	0.0399498							C6orf223	0.0341398		MRGPRF	0.0346434
				HOXD10	0.0391205			RNF183	0.0399086							FLT1	0.0340176		CEACAM4	0.0346182
				TMEM72	0.0390932			DNAAF1	0.0399017							NRG1	0.0339576		IFITM2	0.0345953
				NLRC4	0.0387425			IGSF6	0.0398519							HTRA3	0.0339327		CEMIP	0.0344855
				IGFBP5	0.0386923			MAOA	0.0397452							AGT	0.0338674		DOC2B	0.0344523
				HGF	0.0386474			CKB	0.0397125							IKBIP	0.033771		NTRK2	0.0344397
				MMP1	0.0386337			OSR1	0.0396636							GLT1D1	0.033503		RP11.536O18.1	0.0344188
				SPRR1A	0.0384258			C11orf53	0.0396602							GEM	0.033488		ACSL1	0.0343687
				NNMT	0.0384106			HSD11B2	0.0396528							SOD2	0.0334807		APOBEC3A	0.0343168
				SLC17A4	0.0382612			CHRDL2	0.0395667							HAPLN3	0.0334798		COL4A2	0.0343054
				PRR16	0.0382472			HOXB.AS4	0.0395588							AHNAK2	0.0334381		MMP19	0.0342752
				ESPN	0.0382313			SLC6A20	0.0395566							LAMA1	0.0334306		EGR3	0.0342482
				ALPI	0.0381547			RP11.69I8.2	0.0394632							CXCL8	0.0332769		MGAM	0.0342348
				NRP2	0.038035			VSIG4	0.0394579							SERPINB4	0.0332527		SOX18	0.0342342
				EPN3	0.0379938			ALPL	0.0393889							SHD	0.033208		LGR6	0.0342225
				TUBB3	0.0379811			MAMDC2	0.0393047							ACKR4	0.0328245		WNT5A.AS1	0.0342201
				LCP2	0.0378869			PTAFR	0.0392983							INHBA	0.0327971		CLEC4A	0.0341116
				LRRC31	0.0378544			KRT6A	0.0392803							SBNO2	0.0327182		CDX2	0.0340781
				COL5A2	0.0377245			ETV4	0.0392554							RAB40B	0.0326717		PDLIM4	0.0339723
				PTN	0.0374424			PLXNA1	0.0392339							FAM162A	0.0325246		REG4	0.0339549
				SOWAHA	0.0374257			PKIB	0.0391575							ICAM1	0.0324846		COL4A1	0.0339252
				ADAMTS14	0.0373176			RP11.357H14.17	0.0391528							COL15A1	0.0324759		DPP10	0.033902
				CCDC152	0.0371976			PKDCC	0.0390116							WISP1	0.0324146		GATA2.AS1	0.0338861
				ILDR1	0.03714			MEDAG	0.0389855							PXMP2	0.032341		COL8A1	0.0338857
				C2orf88	0.0370057			LINC01410	0.0389528							CWH43	0.0321642		PLXNA1	0.0337709
				MEFV	0.0370016			ISX	0.0389472							FAP	0.0321083		SGIP1	0.0337154
				CNGA1	0.0368345			CXCL9	0.0389164							SLC7A5	0.0317249		PTGFR	0.0336945
				GFPT2	0.0366609			CWH43	0.0388693							PLA2G10	0.0316401		STOM	0.0336516
				FGR	0.0366489			LIN7A	0.0388159							SERPINB3	0.0315673		C11orf91	0.0336046
				CXCL5	0.0364604			LILRA2	0.038758							ADAMTS2	0.031366		RASSF8	0.0335552
				NCF2	0.0361947			EDN3	0.0387446							VASN	0.0310588		CXCL2	0.0335499
				ICAM1	0.0360111			CLCN2	0.0387201							TGFBI	0.030235		ADGRE3	0.0335409
				LRRC19	0.0359381			SLC6A7	0.0386564							ARNTL2	0.0301823		RP11.467J12.4	0.0334931
				TNFRSF11B	0.0358502			CDH6	0.038608							TNC	0.0301545		ETV4	0.0334372
				CTHRC1	0.0356709			CDX2	0.0385753							PFKFB3	0.0300977		GCA	0.0333784
				SPHK1	0.0356617			CHRNA7	0.0384992							PDE4B	0.029963		CHRNA7	0.0333496
				TLE2	0.0353932			MDFI	0.0384217							FSTL1	0.0299026		DNAH17	0.0332552
				TLR2	0.0353341			PP14571	0.0384114							FCAR	0.0298547		TSPAN2	0.033232
				CDH11	0.0347851			AF127577.10	0.0383168							COL5A2	0.0298247		RP11.689B22.2	0.0331622
				RASSF8	0.0347575			BCL6B	0.0382873							APOL1	0.0297523		KCNJ8	0.0331469
				ACSL4	0.0343863			GPR4	0.0382816							C2orf88	0.0296068		RP11.1070N10.3	0.0331194
				ENTPD5	0.0342956			IL18RAP	0.0382481							CALCRL	0.0294065		LINC00520	0.0330453
				KRTAP13.2	0.0342239			CXCL17	0.0381772							C5AR1	0.0292565		FCN3	0.0330439
				TNFAIP6	0.0342117			HAPLN3	0.0381704							UGT2A3	0.0292443		TGM2	0.0329889
				VAV3	0.0341789			SYT12	0.038167							LILRB3	0.029195		SMOX	0.0329807
				UBTD1	0.0338319			TGFBI	0.0381581							ADGRG6	0.0291619		INSC	0.0329785
				FAP	0.0334909			TGFB3	0.0381542							WARS	0.0291063		DYRK3	0.032968
				P2RY6	0.0334615			BGN	0.0380121							DUSP14	0.029016		SNAI1	0.032959
				VIPR1	0.0333711			DDR1.AS1	0.0380007							LYPD8	0.0289546		SLC6A20	0.0329388
				LGALS4	0.0329526			TMEM37	0.0379922							MYEOV	0.0288307		GJC1	0.0329306
				HOXD12	0.0324365			VIPR1.AS1	0.0379203							P2RY6	0.0287458		LIPG	0.0328912
				THBD	0.032421			COL7A1	0.0379084							KCNJ15	0.0286639		OTOP2	0.0328365
				GJA1	0.0323536			KSR1	0.0378953							SPRR3	0.0285021		SPON2	0.03283
				CEMIP	0.0322463			CERS6.AS1	0.0377837							GK	0.0278837		PDPN	0.0327767
				FGF2	0.0319621			PRRX1	0.0377757							SLC2A3	0.0277766		RP11.407N17.3	0.0327437
				PXMP2	0.0317762			PLA2G3	0.0377722							IL1B	0.0277272		RDH5	0.0325317
				MOGAT2	0.0312881			ADGRG6	0.0376897							ADAMTS9	0.0274211		RP11.216L13.19	0.0325293
				DSE	0.0308274			OLFML2B	0.0374148							BGN	0.0268467		PLEK	0.032518
				IL1R1	0.0304059			TM4SF5	0.0373023							TUBB3	0.0258555		SLC39A5	0.0325088
				SLC39A5	0.0299726			IL1R2	0.0372891							IRAK3	0.0256533		PP14571	0.0324983
				STARD10	0.0297118			FGF7	0.0372587							ITGA5	0.0249688		ACKR4	0.0324506
				PTGFR	0.0290336			ADGRE2	0.037233							OSMR	0.0245522		CLEC4E	0.032417
				BDH1	0.0284552			CEBPB	0.0371685							HIF1A	0.0231804		ITGA2	0.0323943
								PHGR1	0.0371339										TNFRSF10C	0.0323768
								CLEC4E	0.037083										TMTC1	0.0323473
								ADAMTS12	0.0370584										CCL2	0.0323327
								HOXD11	0.0370518										SUCNR1	0.0323139
								ITGA5	0.0370161										SELENBP1	0.0323048
								TRPM6	0.0369858										REP15	0.0322958
								EDNRA	0.0369851										PCDH17	0.032218
								SSTR1	0.0369505										TNFRSF11B	0.0322146
								LRRK2	0.0368777										GPR141	0.0321718
								COL18A1	0.0368747										ZG16	0.0321643
								ACSF2	0.0368742										GNA15	0.0321094
								RMRP	0.036866										RP11.542M13.2	0.0320883
								FADS1	0.0368278										ST3GAL1	0.0320395
								HOXD13	0.0368059										SLCO4A1	0.032039
								SERPINE1	0.0367675										EDNRA	0.0319528
								ABCB1	0.0367519										KRT7	0.03195
								LDHD	0.0367239										RP11.1228E12.1	0.031936
								CYP26B1	0.0367183										PTPRO	0.0318397
								HTRA3	0.0366545										PIM2	0.0317996
								B3GALT5.AS1	0.0365832										OLFM4	0.0317904
								CPXM1	0.0365478										FAM20C	0.0317086
								KRT6B	0.0365063										INHBA	0.0316521
								RP11.1060J15.9	0.0363966										P4HA1	0.0316413
								PPP1R1B	0.0363767										HCAR3	0.0316093
								TNS4	0.0363485										DSE	0.0314794
								TMEM236	0.0363453										CHP2	0.0314601
								S1PR3	0.0363353										NOTCH3	0.0314597
								KIFC3	0.0363192										STAP2	0.0314141
								CLEC12A	0.0362939										STX11	0.0314083
								IFITM2	0.0361732										NDUFA4L2	0.0313383
								CAMK2N1	0.0361515										XXbac.B476C20.9	0.0313293
								VASN	0.0361078										TNFSF9	0.0313247
								VSTM2A	0.0360325										DUOXA2	0.0312798
								OMP	0.0359247										PPP1R1B	0.0312794
								PDLIM4	0.0357875										CYP27B1	0.0311558
								CD163	0.0357189										ACADS	0.0311448
								FBN1	0.0357043										GLDN	0.031138
								CLDN8	0.0356916										PRRX1	0.0310838
								RAI14	0.0356543										SLC7A11	0.0310538
								GPR27	0.0356179										TRABD2A	0.0310312
								CALCRL	0.0355857										COL5A3	0.0309825
								EGFL6	0.0355598										KCNN3	0.0309789
								THRB	0.0355352										GBP1	0.0309558
								C4BPA	0.0354996										MEFV	0.030953
								C17orf107	0.0354842										ADAM12	0.0309526
								FAM25G	0.0354771										TDRD6	0.0308918
								MMP3	0.0354635										COL12A1	0.0308326
								RASD1	0.0354488										RP11.405A12.2	0.0308053
								FXYD3	0.0353514										DYSF	0.0307823
								RNF152	0.0352659										AHNAK2	0.0307382
								RGS5	0.0352359										NPTX2	0.0306918
								SH3RF3.AS1	0.035141										PKIB	0.0304796
								MIR4435.2HG	0.0351256										COL3A1	0.0304623
								NHEJ1	0.035115										SLC11A1	0.0304488
								NFE2	0.035114										PHLDA1	0.0304252
								CTD.2555C10.3	0.0350848										RP11.64K12.4	0.0303753
								BATF3	0.0350421										CCDC152	0.0301974
								RRM2	0.0350378										KDR	0.0301459
								CHP2	0.0350285										CDH3	0.0300623
								NEU4	0.0349541										FOSL1	0.0300433
								SAA2.SAA4	0.0349513										DNAAF1	0.0299824
								SERPINE2	0.0349415										BCL6B	0.0299416
								RP11.297D21.2	0.0349406										NRG1	0.0299373
								NNMT	0.0348965										STC1	0.0299092
								IL22	0.0348957										DPP10.AS1	0.0298167
								COL6A3	0.0348952										CTB.61M7.2	0.0297985
								C2orf82	0.0348598										ADGRE2	0.0296999
								SLC26A2	0.0348122										TRAPPC6A	0.0296688
								TMTC1	0.0347411										FOLR3	0.0296642
								SPOCD1	0.0347003										CREB5	0.0296581
								OSMR	0.0345046										SOD2	0.0296432
								TIMP1	0.0344999										DLC1	0.0295818
								PTPRO	0.0342853										FGF7	0.0295718
								ATP13A4	0.0342216										MMP25	0.0295613
								AMPH	0.0340531										SLC17A4	0.0295571
								CCDC71L	0.0340226										COL1A1	0.029545
								CXCL5	0.0339122										DEFB4B	0.0295391
								RBM24	0.0338435										GFPT2	0.029531
								RP11.486O13.2	0.033826										FAM162A	0.0294799
								FCGR2A	0.0338023										IKBIP	0.0293813
								HSPA6	0.0337956										CSPG4	0.0293717
								TMEM72	0.0337417										NCOA7	0.0293464
								PGLYRP1	0.0336544										LCP2	0.0293436
								SLC17A4	0.0335369										ANKDD1B	0.0293058
								GEM	0.033498										STRIP2	0.0292979
								EPHX2	0.0334643										RP11.1060J15.9	0.0292848
								RXFP4	0.0333809										P2RY6	0.0291918
								PTGES	0.0332992										MUC5AC	0.0290363
								AP000439.3	0.0331297										PLAUR	0.0290164
								CA1	0.0330752										CA1	0.0289908
								RASGRP4	0.0330588										SPRR1A	0.0289807
								PDPN	0.0328803										FOXQ1	0.0289182
								LCP2	0.0328748										SBNO2	0.0289101
								C8orf4	0.0327323										PLAU	0.0288622
								COL1A1	0.0325661										ADGRG6	0.0287813
								ELL3	0.0325634										PDGFB	0.0287583
								ITGB3	0.0324554										XKR9	0.0287091
								RP11.439L18.2	0.0324355										GPR4	0.0287056
								NLRC4	0.032433										RP11.242C19.2	0.0286909
								PIGZ	0.0324184										FXYD3	0.0286585
								EPB41L4B	0.0323633										SERPINB4	0.0286023
								SPRR1A	0.032355										CXCR2	0.0285392
								HTN3	0.0323398										CD93	0.0285157
								HRH2	0.0323134										RGS5	0.0284451
								LAMA1	0.0322934										HAPLN3	0.0284405
								XXbac.B476C20.9	0.0322837										PALM2.AKAP2	0.0283994
								RAVER2	0.0322745										IL18RAP	0.02832
								HGF	0.0322233										GJA4	0.0282609
								TLR2	0.0321328										TGFB2	0.0281787
								B3GNT8	0.0321094										GK.AS1	0.0281391
								TLE2	0.0320959										RMDN2	0.0277211
								CTHRC1	0.0320836										AGT	0.0277114
								ESPN	0.0319959										ADAMTS4	0.0276521
								C3AR1	0.0319014										RP11.292E2.2	0.0273931
								ALPI	0.0318785										FLT1	0.0273136
								NPY4R	0.0318718										CD300E	0.0272605
								GPR176	0.0318649										MIAT	0.0272148
								IGFBP5	0.031851										LINC01503	0.0272013
								LRRC31	0.0318204										COL15A1	0.0270935
								NCF2	0.0316185										OSM	0.0270154
								PCK1	0.0315058										MDFI	0.0269849
								F2RL2	0.0313896										IL1R1	0.0269372
								ICAM1	0.0313693										LYPD8	0.0268687
								FAM189A1	0.0313285										GLT1D1	0.0268637
								COL3A1	0.0312905										LRP8	0.0266973
								TUBB3	0.0310965										SELE	0.0266423
								CTB.31O20.3	0.0310197										ADAMTS2	0.026576
								AC007192.6	0.030878										MIR4435.2HG	0.0265756
								RP11.750H9.5	0.0307261										LMCD1	0.026525
								KIRREL	0.0307155										RP11.638I2.9	0.0265177
								ACSL4	0.0307061										LINC01410	0.0265011
								ADAMTS14	0.0306331										ADAMTS12	0.0263757
								FAP	0.0305556										UBTD1	0.0263156
								SIGLEC5	0.0305457										HTRA3	0.0261301
								CCDC152	0.0305379										RAB40B	0.0260603
								TMEM158	0.0305203										GATA6.AS1	0.0260463
								CNGA1	0.0303826										CDH11	0.0259022
								STAP2	0.0303667										CXCL8	0.025864
								ADAM12	0.0303005										SLC2A3	0.0257903
								RDH5	0.0301356										SH3PXD2A.AS1	0.0257884
								DPP10.AS1	0.0301311										RP13.1016M1.2	0.0256796
								TENM4	0.0300813										LAMA1	0.0256406
								FGF2	0.02996										GJA1	0.0255902
								PRR16	0.0299206										CLDN1	0.025569
								SOWAHA	0.0297573										C6orf223	0.0255689
								HSD11B1	0.0297042										FCAR	0.0254977
								MMP1	0.0294837										BGN	0.0254123
								EPN3	0.0292725										KB.1507C5.4	0.0253621
								LRRC19	0.0292575										TNC	0.0253036
								TNFAIP6	0.0291411										SHD	0.0252777
								C2orf88	0.0290068										WISP1	0.025189
								RP11.405A12.2	0.0289266										NAMPT	0.0251885
								PTN	0.0289125										APOL1	0.0251319
								HAVCR1	0.0288912										CA3.AS1	0.0250011
								CEMIP	0.0287757										PERM1	0.0249714
								SPHK1	0.028775										GEM	0.0249316
								TNFRSF11B	0.0284832										PDE4B	0.0248638
								VAV3	0.0282444										GK	0.024801
								HOXD10	0.0282227										WARS	0.0247954
								SLC39A5	0.0280204										C2orf88	0.0247186
								ENTPD5	0.0277795										COL5A2	0.024713
								CR1	0.0275318										CTB.31O20.3	0.0246023
								GJA1	0.0275004										TGFBI	0.0245848
								COL5A2	0.0274021										SPRR3	0.0244613
								RP11.334J6.7	0.0274006										RP11.92C4.6	0.0244279
								RP11.64K12.4	0.0273379										MYEOV	0.0241433
								RASSF8	0.0272269										ARNTL2	0.024037
								NRP2	0.027172										IL1B	0.0239869
								MEFV	0.0270653										DUSP14	0.0239662
								GFPT2	0.0269676										CSF3	0.0239123
								TMEM98	0.0267553										PLA2G10	0.0238757
								HOXA11.AS	0.0266224										CALCRL	0.0238414
								CDH11	0.0265466										SLC7A5	0.0238198
								VIPR1	0.0263399										ADAMTS9	0.0237618
								UBTD1	0.0262647										SERPINB3	0.0237203
								AC114730.5	0.0262048										C5AR1	0.0235939
								HOXD12	0.0262021										OSMR	0.0235089
								LGALS4	0.0259354										UGT2A3	0.0234256
								ILDR1	0.0258748										VASN	0.0231498
								THBD	0.0256253										CWH43	0.0227921
								STARD10	0.0253771										PXMP2	0.0227725
								MOGAT2	0.0253211										ITGA5	0.0226983
								RP11.638I2.9	0.025148										ICAM1	0.0226252
								FGR	0.025018										KCNJ15	0.0220835
								KRTAP13.2	0.0242418										FAP	0.022062
								IL1R1	0.0240431										LILRB3	0.0216487
								PXMP2	0.0239511										FSTL1	0.0215587
								P2RY6	0.0234389										TUBB3	0.0213554
								DSE	0.0231747										PFKFB3	0.0211288
								PTGFR	0.0222868										IRAK3	0.0202162
								RP11.290L1.3	0.0210164										CTC.518B2.12	0.0196396
								BDH1	0.0192179										HIF1A	0.0178627

## Sheet: ASVs_diff-PUCAI
Taxon	Taxonomy	SV_number	Confidence	Feature_ID	X_calour_stat	X_calour_pval	X_calour_qval	direction_severe_vs_mild
k__Bacteria; p__Firmicutes; c__Clostridia; o__Clostridiales; f__; g__; s__	c__Clostridia.o__Clostridiales_ASV08574	SV08574	0.996183	TACGTAGGGGGCAAGCGTTATCCGGAATTACTGGGTGTAAAGGGAGCGTAGGCGGCATGGTAAGTAAGATGTGAAAGCCCGAGGCTTAACCTCGAGGATTGCATTTTAAACTATCAAGCTAGAGTACAGGAGAGGAAAGCGGAATTCCTA	5.31287	0.00999001	0.0940659	mild
k__Bacteria; p__Firmicutes; c__Clostridia; o__Clostridiales; f__; g__; s__	c__Clostridia.o__Clostridiales_ASV15397	SV15397	0.844269	TACGTATGGTGCAAGCGTTATCCGGATTTACTGGGTGTAAAGGGAGCGTAGGTGGCAAGGCAAGCCAGAAGTGAAAACCCGGGGCTCAACCGCGGGATTGCTTTTGGAACTGTCATGCTAGAGTGCAGGAGGGGTGAGCGGAATTCCTAG	20.0634	0.000999001	0.0355099	mild
k__Bacteria; p__Bacteroidetes; c__Bacteroidia; o__Bacteroidales; f__[Paraprevotellaceae]; g__Paraprevotella; s__	f__.Paraprevotellaceae..g__Paraprevotella_ASV02736	SV02736	1	TACGGAAGATGCGAGCGTTATCCGGATTTATTGGGTTTAAAGGGAGCGTAGGCGGGCTTTTAAGTCAGCGGTCAAATGTCGTGGCTCAACCATGTCAAGCCGTTGAAACTGTAAGCCTTGAGTCTGCACAGGGCACATGGAATTCGTGGT	6.05263	0.00899101	0.0882035	mild
k__Bacteria; p__Firmicutes; c__Clostridia; o__Clostridiales; f__[Tissierellaceae]; g__Parvimonas; s__	f__.Tissierellaceae..g__Parvimonas_ASV15121	SV15121	1	TACGTATGGGGCGAGCGTTGTCCGGAATTATTGGGCGTAAAGGGTACGTAGGCGGCCTTTTAAGTCAGGTGTGAAAGCGTGAGGCTTAACCTCATTAAGCACTTGAAACTGGAAGGCTTGAGTGAAGGAGAGGAAAGTGGAATTCCTAGT	7.26316	0.00599401	0.0685212	mild
k__Bacteria; p__Actinobacteria; c__Actinobacteria; o__Bifidobacteriales; f__Bifidobacteriaceae; g__Bifidobacterium	f__Bifidobacteriaceae.g__Bifidobacterium_ASV11471	SV11471	0.999972	TACGTAGGGTGCAAGCGTTATCCGGAATTATTGGGCGTAAAGGGCTCGTAGGCGGTTCGTCGCGTCCGGTGTGAAAGTCCATCGCTTAACGGTGGATCCGCGCCGGGTACGGGCGGGCTTGAGTGCGGTAGGGGAGACTGGAATTCCCGG	16.5887	0.001998	0.0335914	mild
k__Bacteria; p__Firmicutes; c__Clostridia; o__Clostridiales; f__Clostridiaceae; g__Clostridium; s__	f__Clostridiaceae.g__Clostridium_ASV12376	SV12376	0.997178	TACGTAGGTGACAAGCGTTGTCCGGATTTACTGGGTGTAAAGGGCGCGTAGGCGGACTGTCAAGTCAGTCGTGAAATACCGGGGCTTAACCCCGGGGCTGCGATTGAAACTGACAGCCTTGAGTATCGGAGAGGAAAGCGGAATTCCTAG	14.9074	0.00699301	0.0786531	mild
k__Bacteria; p__Actinobacteria; c__Coriobacteriia; o__Coriobacteriales; f__Coriobacteriaceae; g__Adlercreutzia; s__	f__Coriobacteriaceae.g__Adlercreutzia_ASV10588	SV10588	0.999997	TACGTAGGGGGCGAGCGTTATCCGGATTCATTGGGCGTAAAGCGCGCGTAGGCGGCCGCCTAAGCGGAACCTCTAATCCCGGGGCTCAACCTCGGGCCGGGTTCCGGACTGGGCGGCTCGAGTGCGGTAGAGGCAGGCGGAATTCCCGGG	11.1637	0.001998	0.0335914	mild
k__Bacteria; p__Actinobacteria; c__Coriobacteriia; o__Coriobacteriales; f__Coriobacteriaceae; g__Adlercreutzia; s__	f__Coriobacteriaceae.g__Adlercreutzia_ASV10589	SV10589	0.999997	TACGTAGGGGGCGAGCGTTATCCGGATTCATTGGGCGTAAAGCGCGCGTAGGCGGCCGCCTAAGCGGAACCTCTAATCCCGGGGCTCAACCTCGGGCCGGGTTCCGGACTGGGCGGCTCGAGTGCGGTAGAGGCAGGCGGAATTCCCGGT	10.8947	0.00999001	0.0940659	mild
k__Bacteria; p__Proteobacteria; c__Deltaproteobacteria; o__Desulfovibrionales; f__Desulfovibrionaceae; g__Bilophila; s__	f__Desulfovibrionaceae.g__Bilophila_ASV05654	SV05654	1	TACGGAGGGTGCAAGCGTTAATCGGAATCACTGGGCGTAAAGCGCACGTAGGCGGCTTGGTAAGTCAGGGGTGAAATCCCACAGCCCAACTGTGGAACTGCCTTTGATACTGCCAGGCTTGAGTACCGGAGAGGGTGGCGGAATTCCAGG	14.2349	0.00799201	0.0842047	mild
k__Bacteria; p__Firmicutes; c__Erysipelotrichi; o__Erysipelotrichales; f__Erysipelotrichaceae; g__Holdemania; s__	f__Erysipelotrichaceae.g__Holdemania_ASV14231	SV14231	1	TACGTAGGTGGCGAGCGTTATCCGGAATTATTGGGCGTAAAGGGTGCGCAGGCGGTTTGTTAAGTTTAAGGTGAAAGCGTGGGGCTTAACCCCATATAGCCTTAGAAACTGACAGACTAGAGTACAGGAGAGGGCAATGGAATTCCATGT	12.3294	0.00799201	0.0842047	mild
k__Bacteria; p__Firmicutes; c__Clostridia; o__Clostridiales; f__Lachnospiraceae; g__Anaerostipes; s__	f__Lachnospiraceae.g__Anaerostipes_ASV15075	SV15075	0.999511	TACGTATGGGGCAAGCGTTATCCGGATTTACTGGGTGTAAAGGGAGCGTAGGCGGCATGGCAAGTCAGAAGTGAAAGCCTGGGGCTCAACCCCGGAATTGCTTTTGAAACTGTCAGGCTAGAGTGTCGGAGGGGTAAGCGGAATTCCTAG	13.0468	0.004995	0.0638773	mild
k__Bacteria; p__Firmicutes; c__Clostridia; o__Clostridiales; f__Lachnospiraceae; g__Blautia; s__	f__Lachnospiraceae.g__Blautia_ASV09078	SV09078	0.999667	TACGTAGGGGGCAAGCGTTATCCGGATTTACTGGGTGTAAAGGGAGCGTAGACGGATGGACAAGTCTGATGTGAAAGGCTGGGGCTCAACCCCGGGACTGCATTGGAAACTGCCCGTCTTGAGTGCCGGAGAGGTAAGCGGAATTCCTAG	21.3411	0.000999001	0.0355099	mild
k__Bacteria; p__Firmicutes; c__Clostridia; o__Clostridiales; f__Lachnospiraceae; g__Blautia; s__	f__Lachnospiraceae.g__Blautia_ASV09594	SV09594	0.999841	TACGTAGGGGGCAAGCGTTATCCGGATTTACTGGGTGTAAAGGGAGCGTAGACGGCGCAGCAAGTCTGATGTGAAAGGCAGGGGCTTAACCCCTGGACTGCATTGGAAACTGCTGTGCTTGAGTGCCGGAGGGGTAAGCGGAATTCCTAG	16.6784	0.002997	0.0460968	mild
k__Bacteria; p__Firmicutes; c__Clostridia; o__Clostridiales; f__Lachnospiraceae; g__Blautia; s__	f__Lachnospiraceae.g__Blautia_ASV09918	SV09918	0.999996	TACGTAGGGGGCAAGCGTTATCCGGATTTACTGGGTGTAAAGGGAGCGTAGACGGTGTGGCAAGTCTGATGTGAAAGGCATGGGCTCAACCTGTGGACTGCATTGGAAACTGTCATACTTGAGTGCCGGAGGGGTAAGCGGAATTCCTAG	16.7456	0.003996	0.0559441	mild
k__Bacteria; p__Firmicutes; c__Clostridia; o__Clostridiales; f__Lachnospiraceae; g__Coprococcus; s__	f__Lachnospiraceae.g__Coprococcus_ASV10209	SV10209	0.898389	TACGTAGGGGGCAAGCGTTATCCGGATTTACTGGGTGTAAAGGGTGCGTAGGTGGCAAGGCAAGTCAGATGTGAAAGCCCGGGGCTCAACCCCGGTACTGCATTTGAAACTGTCTGGCTAGAGTGCAGGAGAGGTAAGCGGAATTCCTAG	7.26316	0.002997	0.0460968	mild
k__Bacteria; p__Firmicutes; c__Clostridia; o__Clostridiales; f__Lachnospiraceae; g__Coprococcus; s__	f__Lachnospiraceae.g__Coprococcus_ASV15003	SV15003	0.999122	TACGTATGGAGCAAGCGTTATCCGGATTTACTGGGTGTAAAGGGTGCGTAGGTGGCAGTGCAAGTCAGATGTGAAAGGCCGGGGCTCAACCCCGGAGCTGCATTTGAAACTGCATAGCTAGAGTACAGGAGAGGCAGGCGGAATTCCTAG	16.7232	0.000999001	0.0355099	mild
k__Bacteria; p__Firmicutes; c__Clostridia; o__Clostridiales; f__Lachnospiraceae; g__Coprococcus; s__	f__Lachnospiraceae.g__Coprococcus_ASV15011	SV15011	0.999133	TACGTATGGAGCAAGCGTTATCCGGATTTACTGGGTGTAAAGGGTGCGTAGGTGGCAGTGCAAGTCAGATGTGAAAGGCCGGGGCTCAACCCCGGAGCTGCATTTGAAACTGCTCGGCTAGAGTACAGGAGAGGCAGGCGGAATTCCTAG	14.7729	0.010989	0.0931925	mild
k__Bacteria; p__Firmicutes; c__Clostridia; o__Clostridiales; f__Lachnospiraceae; g__Dorea; s__	f__Lachnospiraceae.g__Dorea_ASV15355	SV15355	0.99997	TACGTATGGTGCAAGCGTTATCCGGATTTACTGGGTGTAAAGGGAGCGTAGACGGCTGTGTAAGTCTGAAGTGAAAGCCCGGGGCTCAACCCCGGGACTGCTTTGGAAACTATGCAGCTAGAGTGTCGGAGAGGTAAGTGGAATTCCCAG	15.8938	0.00599401	0.0685212	mild
k__Bacteria; p__Firmicutes; c__Clostridia; o__Clostridiales; f__Lachnospiraceae; g__Roseburia	f__Lachnospiraceae.g__Roseburia_ASV15174	SV15174	0.999971	TACGTATGGTGCAAGCGTTATCCGGATTTACTGGGTGTAAAGGGAGCGCAGGCGGAAGGCTAAGTCTGATGTGAAAGCCCGGGGCTCAACCCCGGTACTGCATTGGAAACTGGTCATCTAGAGTGTCGGAGGGGTAAGTGGAATTCCTAG	16.768	0.001998	0.0335914	mild
k__Bacteria; p__Firmicutes; c__Clostridia; o__Clostridiales; f__Ruminococcaceae; g__Oscillospira; s__	f__Ruminococcaceae.g__Oscillospira_ASV12634	SV12634	0.998772	TACGTAGGTGGCAAGCGTTATCCGGATTTACTGGGTGTAAAGGGCGTGTAGGCGGGAAGGCAAGTCAGATGTGAAAACTATGGGCTCAACCCATAGCCTGCATTTGAAACTGTTTTTCTTGAGTGCTGGAGAGGCAATCGGAATTCCGTG	15.1988	0.000999001	0.0355099	mild
k__Bacteria; p__Firmicutes; c__Clostridia; o__Clostridiales; f__Ruminococcaceae; g__Oscillospira; s__	f__Ruminococcaceae.g__Oscillospira_ASV13659	SV13659	0.99981	TACGTAGGTGGCAAGCGTTGTCCGGATTTACTGGGTGTAAAGGGCGTGCAGCCGGGCCGGCAAGTCAGATGTGAAATCTGGAGGCTTAACCTCCAAACTGCATTTGAAACTGTAGGTCTTGAGTACCGGAGAGGTTATCGGAATTCCTTG	15.8713	0.002997	0.0460968	mild
k__Bacteria; p__Firmicutes; c__Clostridia; o__Clostridiales; f__Ruminococcaceae; g__Oscillospira; s__	f__Ruminococcaceae.g__Oscillospira_ASV13741	SV13741	0.951092	TACGTAGGTGGCAAGCGTTGTCCGGATTTACTGGGTGTAAAGGGCGTGTAGCCGGGAAGGCAAGTCAGATGTGAAATCCACGGGCTTAACTCGTGAACTGCATTTGAAACTACTTTTCTTGAGTATCGGAGAGGCAATCGGAATTCCTAG	6.85965	0.010989	0.0931925	mild
k__Bacteria; p__Firmicutes; c__Clostridia; o__Clostridiales; f__Ruminococcaceae; g__Ruminococcus; s__	f__Ruminococcaceae.g__Ruminococcus_ASV07554	SV07554	0.999531	TACGTAGGGAGCAAGCGTTGTCCGGATTTACTGGGTGTAAAGGGTGCGTAGGCGGATTGGCAAGTCAGAAGTGAAATCCATGGGCTTAACCCATGAACTGCTTTTGAAACTGTTAGTCTTGAGTGAAGTAGAGGTAGGCGGAATTCCCGG	14.8626	0.004995	0.0638773	mild
k__Bacteria; p__Firmicutes; c__Clostridia; o__Clostridiales; f__Ruminococcaceae; g__Ruminococcus; s__	f__Ruminococcaceae.g__Ruminococcus_ASV08122	SV08122	0.999505	TACGTAGGGAGCGAGCGTTGTCCGGATTTACTGGGTGTAAAGGGTGCGTAGGCGGCAGAGCAAGTCAGGCGTGAAAGCCATGGGCTTAACCCATGAACTGCGCTTGAAACTGTTTTGCTTGAGTGAAGTAGAGGCAGGCGGAATTCCCGG	11.3431	0.001998	0.0335914	mild
k__Bacteria; p__Bacteroidetes; c__Bacteroidia; o__Bacteroidales; f__Rikenellaceae; g__Alistipes; s__onderdonkii	g__Alistipes.s__onderdonkii_ASV05119	SV05119	0.871321	TACGGAGGATTCAAGCGTTATCCGGATTTATTGGGTTTAAAGGGTGCGTAGGCGGTTTGATAAGTTAGAGGTGAAATCCCGGGGCTTAACTCCGGAACTGCCTCTAATACTGTTAGACTAGAGAGTAGTTGCGGTAGGCGGAATGTATGG	13.3158	0.00699301	0.0786531	mild
k__Bacteria; p__Bacteroidetes; c__Bacteroidia; o__Bacteroidales; f__Bacteroidaceae; g__Bacteroides; s__uniformis	g__Bacteroides.s__uniformis_ASV03984	SV03984	0.999418	TACGGAGGATCCGAGCGTTATCCGGATTTATTGGGTTTAAAGGGAGCGTAGGCGGACGCTTAAGTCAGTTGTGAAAGTTTGCGGCTCAACCGTAAAATTGCAGTTGATACTGGGTGTCTTGAGTACAGTAGAGGCAGGCGGAATTCGTGG	17.306	0.000999001	0.0355099	mild
k__Bacteria; p__Firmicutes; c__Clostridia; o__Clostridiales; f__Lachnospiraceae; g__Blautia; s__obeum	g__Blautia.s__obeum_ASV09003	SV09003	0.999384	TACGTAGGGGGCAAGCGTTATCCGGATTTACTGGGTGTAAAGGGAGCGTAGACGGACTGGCAAGTCTGATGTGAAAGGCGGGGGCTCAACCCCTGGACTGCATTGGAAACTGTTAGTCTTGAGTGCCGGAGAGGTAAGCGGAATTCCTAG	16.7008	0.001998	0.0335914	mild
k__Bacteria; p__Firmicutes; c__Clostridia; o__Clostridiales; f__Lachnospiraceae; g__Blautia; s__producta	g__Blautia.s__producta_ASV08960	SV08960	0.999841	TACGTAGGGGGCAAGCGTTATCCGGATTTACTGGGTGTAAAGGGAGCGTAGACGGAAGAGCAAGTCTGATGTGAAAGGCTGGGGCTTAACCCCAGGACTGCATTGGAAACTGTTTTTCTTGAGTGCCGGAGAGGTAAGCGGAATTCCTAG	10.0429	0.011988	0.0957856	mild
k__Bacteria; p__Firmicutes; c__Clostridia; o__Clostridiales; f__Lachnospiraceae; g__Clostridium; s__clostridioforme	g__Clostridium.s__clostridioforme_ASV09123	SV09123	0.979406	TACGTAGGGGGCAAGCGTTATCCGGATTTACTGGGTGTAAAGGGAGCGTAGACGGCAAGGCAAGTCTGATGTGAAAACCCAGGGCTTAACCCTGGGACTGCATTGGAAACTGTCTGGCTCGAGTGCCGGAGAGGTAAGCGGAATTCCTAG	16.7904	0.000999001	0.0355099	mild
k__Bacteria; p__Firmicutes; c__Clostridia; o__Clostridiales; f__Ruminococcaceae; g__Faecalibacterium; s__prausnitzii	g__Faecalibacterium.s__prausnitzii_ASV00156	SV00156	0.992631	AACGTAGGGTGCAAGCGTTGTCCGGAATTACTGGGTGTAAAGGGAGCGCAGGCGGGAAGACAAGTTGGAAGTGAAAACCATGGGCTCAACCCATGAATTGCTTTCAAAACTGTTTTTCTTGAGTAGTGCAGAGGTAGATGGAATTCCCGG	17.463	0.000999001	0.0355099	mild
k__Bacteria; p__Firmicutes; c__Clostridia; o__Clostridiales; f__Lachnospiraceae; g__Roseburia; s__faecis	g__Roseburia.s__faecis_ASV15263	SV15263	0.795475	TACGTATGGTGCAAGCGTTATCCGGATTTACTGGGTGTAAAGGGAGCGCAGGCGGTGCGGCAAGTCTGATGTGAAAGCCCGGGGCTCAACCCCGGTACTGCATTGGAAACTGTCGTACTAGAGTGTCGGAGGGGTAAGCGGAATTCCTAG	16.8577	0.00599401	0.0685212	mild
k__Bacteria; p__Firmicutes; c__Clostridia; o__Clostridiales; f__[Mogibacteriaceae]; g__; s__	o__Clostridiales.f__.Mogibacteriaceae._ASV08647	SV08647	1	TACGTAGGGGGCAAGCGTTATCCGGAATTATTGGGCGTAAAGAGTACGTAGGTGGTTTTCTAAGCACGGGGTTTAAGGCAATGGCTTAACCATTGTTCGCCTTGTGAACTGGAAGACTTGAGTGCAGGAGAGGAAAGCGGAATTCCTAGT	18.2251	0.002997	0.0460968	mild
k__Bacteria; p__Firmicutes; c__Clostridia; o__Clostridiales; f__[Mogibacteriaceae]; g__; s__	o__Clostridiales.f__.Mogibacteriaceae._ASV08690	SV08690	0.999997	TACGTAGGGGGCAAGCGTTATCCGGAATTATTGGGCGTAAAGGGTACGTAGGTGGTTACCTAAGCACAGGGTATAAGGCAATAGCTTAACTATTGTTCGCCTTGTGAACTGGGCTACTTGAGTGCAGGAGAGGAAAGCGGAATTCCTAGT	8.45127	0.010989	0.0931925	mild
k__Bacteria; p__Firmicutes; c__Clostridia; o__Clostridiales; f__Lachnospiraceae; g__; s__	o__Clostridiales.f__Lachnospiraceae_ASV08865	SV08865	0.994383	TACGTAGGGGGCAAGCGTTATCCGGATTTACTGGGTGTAAAGGGAGCGCAGGCGGCATGATAAGTCTGATGTGAAAACCCAAGGCTCAACCATGGGACTGCATTGGAAACTGTCGTGCTGGAGTGTCGGAGAGGTAAGCGGAATTCCTAG	9.23587	0.00599401	0.0685212	mild
k__Bacteria; p__Firmicutes; c__Clostridia; o__Clostridiales; f__Lachnospiraceae; g__; s__	o__Clostridiales.f__Lachnospiraceae_ASV08984	SV08984	0.933765	TACGTAGGGGGCAAGCGTTATCCGGATTTACTGGGTGTAAAGGGAGCGTAGACGGAATGGCAAGTCTGATGTGAAAGGCCGGGGCTCAACCCCGGGACTGCATTGGAAACTGTCAATCTAGAGTACCGGAGGGGTAAGTGGAATTCCTAG	18.4269	0.001998	0.0335914	mild
k__Bacteria; p__Firmicutes; c__Clostridia; o__Clostridiales; f__Lachnospiraceae; g__; s__	o__Clostridiales.f__Lachnospiraceae_ASV09113	SV09113	0.701136	TACGTAGGGGGCAAGCGTTATCCGGATTTACTGGGTGTAAAGGGAGCGTAGACGGCAAGGCAAGTCTGAAGTGAAAGCCCGGTGCTTAACGCCGGGACTGCTTTGGAAACTGTTTAGCTGGAGTGCCGGAGAGGTAAGCGGAATTCCTAG	14.4366	0.00599401	0.0685212	mild
k__Bacteria; p__Firmicutes; c__Clostridia; o__Clostridiales; f__Lachnospiraceae; g__; s__	o__Clostridiales.f__Lachnospiraceae_ASV09170	SV09170	0.963587	TACGTAGGGGGCAAGCGTTATCCGGATTTACTGGGTGTAAAGGGAGCGTAGACGGCACAGCAAGTCTGAAGTGAAATCCCCGGGCTCAACCCGGGAACTGCTTTGGAAACTGTTGGGCTAGAGTGCTGGAGAGGCAAGCGGAATTCCTAG	10.3119	0.010989	0.0931925	mild
k__Bacteria; p__Firmicutes; c__Clostridia; o__Clostridiales; f__Lachnospiraceae; g__; s__	o__Clostridiales.f__Lachnospiraceae_ASV09523	SV09523	0.932932	TACGTAGGGGGCAAGCGTTATCCGGATTTACTGGGTGTAAAGGGAGCGTAGACGGCGAGGCAAGTCTGATGTGAAAACCCGGGGCTCAACCCCGTGACTGCATTGGAAACTGTTTTGCTTGAGTGCCGGAGAGGTAAGCGGAATTCCTAG	12.9347	0.001998	0.0335914	mild
k__Bacteria; p__Firmicutes; c__Clostridia; o__Clostridiales; f__Lachnospiraceae; g__; s__	o__Clostridiales.f__Lachnospiraceae_ASV09753	SV09753	0.866427	TACGTAGGGGGCAAGCGTTATCCGGATTTACTGGGTGTAAAGGGAGCGTAGACGGCTTTGCAAGTCTGACGTGAAACTCCGGGGCTCAACTCCGGAACTGCGTTGGAAACTGTAAGGCTTGAGTGCCGGAGAGGTAAGCGGAATTCCTAG	14.885	0.001998	0.0335914	mild
k__Bacteria; p__Firmicutes; c__Clostridia; o__Clostridiales; f__Lachnospiraceae; g__; s__	o__Clostridiales.f__Lachnospiraceae_ASV09977	SV09977	0.945306	TACGTAGGGGGCAAGCGTTATCCGGATTTACTGGGTGTAAAGGGAGCGTAGACGGTTTTGCAAGTCTGAAGTGAAAGCCCGGGGCTTAACCCCGGGACTGCTTTGGAAACTGTAGAACTAGAGTGCAGGAGAGGTAAGTGGAATTCCTAG	12.9123	0.011988	0.0957856	mild
k__Bacteria; p__Firmicutes; c__Clostridia; o__Clostridiales; f__Lachnospiraceae	o__Clostridiales.f__Lachnospiraceae_ASV10079	SV10079	0.956382	TACGTAGGGGGCAAGCGTTATCCGGATTTACTGGGTGTAAAGGGAGCGTAGGCGGTCTGGCAAGCCAGAAGTGAAAGCCCGGGGCTTAACCCCGGGACTGCTTTTGGAACTGTTAGACTAGAGTGTCGGAGAGGTAAGTGGAATTCCTAG	15.0643	0.001998	0.0335914	mild
k__Bacteria; p__Firmicutes; c__Clostridia; o__Clostridiales; f__Lachnospiraceae; g__; s__	o__Clostridiales.f__Lachnospiraceae_ASV14891	SV14891	0.96946	TACGTATGGAGCAAGCGTTATCCGGATTTACTGGGTGTAAAGGGAGCGTAGGCGGTCCTGCAAGTCTGATGTGAAAGGCCGGGGCTCAACCCCGGGACTGCATTGGAAACTGTAGGACTAGAGTGTCGGAGGGGTAAGTGGAATTCCTAG	16.9922	0.000999001	0.0355099	mild
k__Bacteria; p__Firmicutes; c__Clostridia; o__Clostridiales; f__Ruminococcaceae; g__; s__	o__Clostridiales.f__Ruminococcaceae_ASV00145	SV00145	0.745043	AACGTAGGGTGCAAGCGTTGTCCGGAATTACTGGGTGTAAAGGGAGCGCAGGCGGATTGGCAAGTTGGGAGTGAAATCTATGGGCTCAACCCATAAATTGCTTTCAAAACTGTCAGTCTTGAGTGGTGTAGAGGTAGGCGGAATTCCCGG	17.8441	0.000999001	0.0355099	mild
k__Bacteria; p__Firmicutes; c__Clostridia; o__Clostridiales; f__Ruminococcaceae; g__; s__	o__Clostridiales.f__Ruminococcaceae_ASV07190	SV07190	0.753344	TACGTAGGGAGCAAGCGTTATCCGGATTTACTGGGTGTAAAGGGCGCGCAGGCGGGCCGGTAAGTTGGAAGTGAAATCTATGGGCTTAACCCATAAACTGCTTTCAAAACTGCTGGTCTTGAGTGATGGAGAGGCAGGCGGAATTCCGTG	15.4678	0.004995	0.0638773	mild
k__Bacteria; p__Firmicutes; c__Clostridia; o__Clostridiales; f__Ruminococcaceae	o__Clostridiales.f__Ruminococcaceae_ASV13704	SV13704	0.999956	TACGTAGGTGGCAAGCGTTGTCCGGATTTACTGGGTGTAAAGGGCGTGCAGCCGGGTCTGCAAGTCAGATGTGAAATCCATGGGCTCAACCCATGAACTGCATTTGAAACTGTAGATCTTGAGTGTCGGAGGGGCAATCGGAATTCCTAG	14.1228	0.003996	0.0559441	mild
k__Bacteria; p__Firmicutes; c__Clostridia; o__Clostridiales; f__Ruminococcaceae; g__; s__	o__Clostridiales.f__Ruminococcaceae_ASV13892	SV13892	0.700364	TACGTAGGTGGCAAGCGTTGTCCGGATTTACTGGGTGTAAAGGGCGTGTAGGCGGGTAGACAAGTCAGATGTGAAATACCGGGGCTCAACTCCGGGGCTGCATTTGAAACTGTATATCTTGAGTGTCGGAGAGGAAAGCGGAATTCCTAG	9.54971	0.00799201	0.0842047	mild
k__Bacteria; p__Actinobacteria; c__Coriobacteriia; o__Coriobacteriales; f__Coriobacteriaceae; g__; s__	o__Coriobacteriales.f__Coriobacteriaceae_ASV10586	SV10586	0.999988	TACGTAGGGGGCGAGCGTTATCCGGATTCATTGGGCGTAAAGCGCGCGTAGGCGGCCCGTCAAGCGGAACCTCTAACCCGAGGGCTCAACCCCCGGTCGGGTTCCGAACTGGCAGGCTCGAGTTTGGTAGAGGAAGATGGAATTCCCGGT	11.4776	0.010989	0.0931925	mild
k__Bacteria; p__Firmicutes; c__Clostridia; o__Clostridiales; f__[Mogibacteriaceae]; g__Mogibacterium; s__	f__.Mogibacteriaceae..g__Mogibacterium_ASV08676	SV08676	1	TACGTAGGGGGCAAGCGTTATCCGGAATTATTGGGCGTAAAGAGTGCGTAGGTGGTTACCTAAGCGCAAGGTTTAATTTAGAGGCTCAACCTCTACTTGCCTTGCGAACTGGGCTACTTGAGTGCAGGAGGGGAAAGCGGAATTCCTAGT	-14.3021	0.001998	0.0335914	severe
k__Bacteria; p__Actinobacteria; c__Actinobacteria; o__Actinomycetales; f__Actinomycetaceae; g__Actinomyces; s__	f__Actinomycetaceae.g__Actinomyces_ASV08325	SV08325	1	TACGTAGGGCGCGAGCGTTGTCCGGAATTATTGGGCGTAAAGAGCTCGTAGGCGGCTGGTCGCGTCTGTCGTGAAATCCTCTGGCTTAACTGGGGGCTTGCGGTGGGTACGGGCCGGCTTGAGTGCGGTAGGGGAGACTGGAACTCCTGG	-9.88596	0.010989	0.0931925	severe
k__Bacteria; p__Actinobacteria; c__Actinobacteria; o__Actinomycetales; f__Actinomycetaceae; g__Actinomyces; s__	f__Actinomycetaceae.g__Actinomyces_ASV08375	SV08375	0.998921	TACGTAGGGCGCGAGCGTTGTCCGGAATTATTGGGCGTAAAGGGCTTGTAGGCGGTTGGTCGCGTCTGCCGTGAAATCCTCTGGCTTAACTGGGGGCGTGCGGTGGGTACGGGCTGACTTGAGTGCGGTAGGGGAGACTGGAACTCCTGG	-17.7992	0.001998	0.0335914	severe
k__Bacteria; p__Proteobacteria; c__Epsilonproteobacteria; o__Campylobacterales; f__Campylobacteraceae; g__Campylobacter; s__	f__Campylobacteraceae.g__Campylobacter_ASV05934	SV05934	0.999996	TACGGAGGGTGCAAGCGTTACTCGGAATCACTGGGCGTAAAGGACGCGTAGGCGGATTATCAAGTCTCTTGTGAAATCCTATGGCTTAACCATAGAACTGCTTGGGAAACTGATAATCTAGAGTGAGGGAGAGGCAGATGGAATTGGTGG	-11.9259	0.001998	0.0335914	severe
k__Bacteria; p__Firmicutes; c__Bacilli; o__Lactobacillales; f__Enterococcaceae; g__Enterococcus	f__Enterococcaceae.g__Enterococcus_ASV13969	SV13969	0.891472	TACGTAGGTGGCAAGCGTTGTCCGGATTTATTGGGCGTAAAGCGAGCGCAGGCGGTTTCTTAAGTCTGATGTGAAAGCCCCCGGCTCAACCGGGGAGGGTCATTGGAAACTGGGAGACTTGAGTGCAGAAGAGGAGAGTGGAATTCCATG	-9.0117	0.00899101	0.0882035	severe
k__Bacteria; p__Fusobacteria; c__Fusobacteriia; o__Fusobacteriales; f__Fusobacteriaceae; g__Fusobacterium; s__	f__Fusobacteriaceae.g__Fusobacterium_ASV15520	SV15520	1	TACGTATGTCACGAGCGTTATCCGGATTTATTGGGCGTAAAGCGCGTCTAGGTGGTTATGTAAGTCTGATGTGAAAATGCAGGGCTCAACTCTGTATTGCGTTGGAAACTGTATAACTAGAGTACTGGAGAGGTAAGCGGAACTACAAGT	-14.4142	0.003996	0.0559441	severe
k__Bacteria; p__Fusobacteria; c__Fusobacteriia; o__Fusobacteriales; f__Fusobacteriaceae; g__Fusobacterium; s__	f__Fusobacteriaceae.g__Fusobacterium_ASV15522	SV15522	1	TACGTATGTCACGAGCGTTATCCGGATTTATTGGGCGTAAAGCGCGTCTAGGTGGTTATGTAAGTCTGATGTGAAAATGCAGGGCTCAACTCTGTATTGCGTTGGAAACTGTGTAACTAGAGTACTGGAGAGGTAAGCGGAACTACAAGT	-9.0117	0.011988	0.0957856	severe
k__Bacteria; p__Firmicutes; c__Bacilli; o__Lactobacillales; f__Streptococcaceae; g__Streptococcus; s__	f__Streptococcaceae.g__Streptococcus_ASV12252	SV12252	0.999004	TACGTAGGTCCCGAGCGTTATCCGGATTTATTGGGCGTAAAGCGAGCGCAGGCGGTTAGATAAGTCTGAAGTTAAAGGCTGTGGCTTAACCATAGTACGCTTTGGAAACTGTTTAACTTGAGTGCAGAAGGGGAGAGTGGAATTCCATGT	-20.0858	0.000999001	0.0355099	severe
k__Bacteria; p__Firmicutes; c__Clostridia; o__Clostridiales; f__Veillonellaceae; g__Megasphaera; s__	f__Veillonellaceae.g__Megasphaera_ASV13393	SV13393	0.930453	TACGTAGGTGGCAAGCGTTGTCCGGAATTATTGGGCGTAAAGGGCGCGCAGGCGGCTTCTTAAGTCTGTCTTAAAAGTGCGGGGCTTAACCCCGTGATGGGATGGAAACTGGGAAGCTCAGAGTATCGGAGAGGAAAGCGGAATTCCTAG	-22.0136	0.000999001	0.0355099	severe
k__Bacteria; p__Proteobacteria; c__Gammaproteobacteria; o__Pasteurellales; f__Pasteurellaceae; g__Haemophilus; s__parainfluenzae	g__Haemophilus.s__parainfluenzae_ASV06380	SV06380	0.930503	TACGGAGGGTGCGAGCGTTAATCGGAATAACTGGGCGTAAAGGGCACGCAGGCGGTGACTTAAGTGAGGTGTGAAAGCCCCGGGCTTAACCTGGGAATTGCATTTCATACTGGGTCGCTAGAGTACTTTAGGGAGGGGTAGAATTCCACG	-17.4405	0.001998	0.0335914	severe
k__Bacteria; p__Firmicutes; c__Clostridia; o__Clostridiales; f__Veillonellaceae; g__Veillonella; s__dispar	g__Veillonella.s__dispar_ASV13143	SV13143	0.988588	TACGTAGGTGGCAAGCGTTGTCCGGAATTATTGGGCGTAAAGCGCGCGCAGGCGGATAGGTCAGTCTGTCTTAAAAGTTCGGGGCTTAACCCCGTGATGGGATGGAAACTGCCAATCTAGAGTATCGGAGAGGAAAGTGGAATTCCTAGT	-14.4591	0.00799201	0.0842047	severe
k__Bacteria; p__Firmicutes; c__Clostridia; o__Clostridiales; f__Veillonellaceae; g__Veillonella; s__parvula	g__Veillonella.s__parvula_ASV13157	SV13157	0.922387	TACGTAGGTGGCAAGCGTTGTCCGGAATTATTGGGCGTAAAGCGCGCGCAGGCGGATCAGTCAGTCTGTCTTAAAAGTTCGGGGCTTAACCCCGTGATGGGATGGAAACTGCTGATCTAGAGTATCGGAGAGGAAAGTGGAATTCCTAGT	-14.8402	0.00899101	0.0882035	severe

## Sheet: lncRNA_ASVs_associations
X_features_taxa	Y_features_lncRNA	association	p-values	q-values	include
o__Clostridiales.f__Ruminococcaceae_ASV00145	AGAP2.AS1	-0.323055	3.8995e-05	0.0276845	included in Figure
f__Ruminococcaceae.g__Ruminococcus_ASV08122	AGAP2.AS1	-0.288224	0.000263567	0.0583143	included in Figure
f__Lachnospiraceae.g__Coprococcus_ASV15011	AGAP2.AS1	-0.271606	0.000604056	0.0677546	included in Figure
o__Clostridiales.f__Lachnospiraceae_ASV10079	AGAP2.AS1	-0.266243	0.000780891	0.0677546	included in Figure
f__Lachnospiraceae.g__Coprococcus_ASV15003	AGAP2.AS1	-0.265828	0.000796384	0.0677546	included in Figure
g__Roseburia.s__faecis_ASV15263	AGAP2.AS1	-0.251301	0.00155376	0.0677546	included in Figure
o__Clostridiales.f__Lachnospiraceae_ASV09113	AGAP2.AS1	-0.215161	0.006988	0.0903964	included in Figure
o__Clostridiales.f__Lachnospiraceae_ASV08984	AGAP2.AS1	-0.214904	0.00705752	0.0903964	included in Figure
g__Faecalibacterium.s__prausnitzii_ASV00156	AGAP2.AS1	-0.214142	0.0072675	0.0903964	included in Figure
f__Lachnospiraceae.g__Blautia_ASV09918	AGAP2.AS1	-0.21301	0.0075894	0.0903964	included in Figure
f__Bifidobacteriaceae.g__Bifidobacterium_ASV11471	AGAP2.AS1	-0.212418	0.00776286	0.0903964	included in Figure
f__Ruminococcaceae.g__Oscillospira_ASV12634	AGAP2.AS1	-0.207419	0.00937279	0.0948552	included in Figure
g__Alistipes.s__onderdonkii_ASV05119	AGAP2.AS1	-0.20514	0.0102	0.0969941	included in Figure
o__Clostridiales.f__Ruminococcaceae_ASV13892	AGAP2.AS1	-0.204803	0.0103276	0.0969941	included in Figure
o__Coriobacteriales.f__Coriobacteriaceae_ASV10586	AGAP2.AS1	-0.203433	0.0108612	0.0970928	included in Figure
f__.Mogibacteriaceae..g__Mogibacterium_ASV08676	AGAP2.AS1	0.205087	0.01022	0.0969941	included in Figure
g__Veillonella.s__dispar_ASV13143	AGAP2.AS1	0.218503	0.00613747	0.0903964	included in Figure
f__Enterococcaceae.g__Enterococcus_ASV13969	AGAP2.AS1	0.221435	0.00546857	0.0876496	included in Figure
f__Veillonellaceae.g__Megasphaera_ASV13393	B3GALT5.AS1	-0.214486	0.00717211	0.0903964	included in Figure
f__Streptococcaceae.g__Streptococcus_ASV12252	B3GALT5.AS1	-0.203455	0.0108525	0.0970928	included in Figure
f__Ruminococcaceae.g__Ruminococcus_ASV08122	B3GALT5.AS1	0.211426	0.00806141	0.0920561	included in Figure
f__Lachnospiraceae.g__Coprococcus_ASV15011	B3GALT5.AS1	0.216248	0.00670048	0.0903964	included in Figure
f__Lachnospiraceae.g__Blautia_ASV09078	B3GALT5.AS1	0.244181	0.00212676	0.0685727	included in Figure
f__Lachnospiraceae.g__Blautia_ASV09918	B3GALT5.AS1	0.346106	9.61459e-06	0.0170178	included in Figure
o__Clostridiales.f__Ruminococcaceae_ASV00145	CCAT1	-0.314364	6.42522e-05	0.0276845	included in Figure
f__Lachnospiraceae.g__Coprococcus_ASV15011	CCAT1	-0.276254	0.000481481	0.0677546	included in Figure
o__Clostridiales.f__Lachnospiraceae_ASV10079	CCAT1	-0.262032	0.000951831	0.0677546	included in Figure
f__Lachnospiraceae.g__Coprococcus_ASV15003	CCAT1	-0.2555	0.00128578	0.0677546	included in Figure
g__Bacteroides.s__uniformis_ASV03984	CCAT1	-0.253666	0.00139717	0.0677546	included in Figure
f__Lachnospiraceae.g__Blautia_ASV09078	CCAT1	-0.249145	0.00171033	0.0677546	included in Figure
f__Erysipelotrichaceae.g__Holdemania_ASV14231	CCAT1	-0.248744	0.00174096	0.0677546	included in Figure
f__Ruminococcaceae.g__Oscillospira_ASV12634	CCAT1	-0.243592	0.00218191	0.0685727	included in Figure
g__Faecalibacterium.s__prausnitzii_ASV00156	CCAT1	-0.233397	0.00336472	0.0785687	included in Figure
o__Clostridiales.f__Lachnospiraceae_ASV14891	CCAT1	-0.233301	0.00337818	0.0785687	included in Figure
o__Clostridiales.f__.Mogibacteriaceae._ASV08647	CCAT1	-0.23207	0.00355518	0.0785687	included in Figure
f__Ruminococcaceae.g__Oscillospira_ASV13741	CCAT1	-0.231981	0.00356834	0.0785687	included in Figure
f__Lachnospiraceae.g__Roseburia_ASV15174	CCAT1	-0.224603	0.00481986	0.0851978	included in Figure
g__Roseburia.s__faecis_ASV15263	CCAT1	-0.220758	0.00561703	0.0876496	included in Figure
o__Clostridiales.f__Ruminococcaceae_ASV13704	CCAT1	-0.21591	0.00678883	0.0903964	included in Figure
f__.Paraprevotellaceae..g__Paraprevotella_ASV02736	CCAT1	-0.209574	0.00864588	0.0940871	included in Figure
f__Ruminococcaceae.g__Ruminococcus_ASV07554	CCAT1	-0.209056	0.0088157	0.0940871	included in Figure
o__Clostridiales.f__Lachnospiraceae_ASV08984	CCAT1	-0.206285	0.00977671	0.0961377	included in Figure
o__Clostridiales.f__Ruminococcaceae_ASV13892	CCAT1	-0.204972	0.0102636	0.0969941	included in Figure
f__Lachnospiraceae.g__Anaerostipes_ASV15075	CCAT1	-0.203815	0.0107102	0.0970928	included in Figure
f__Veillonellaceae.g__Megasphaera_ASV13393	CCAT1	0.203621	0.0107866	0.0970928	included in Figure
f__Streptococcaceae.g__Streptococcus_ASV12252	CCAT1	0.206621	0.00965549	0.0959322	included in Figure
f__Enterococcaceae.g__Enterococcus_ASV13969	CCAT1	0.207763	0.00925338	0.0948552	included in Figure
g__Haemophilus.s__parainfluenzae_ASV06380	CCAT1	0.229881	0.0038908	0.0819847	included in Figure
g__Veillonella.s__parvula_ASV13157	CCAT1	0.265859	0.000795221	0.0677546	included in Figure
f__Streptococcaceae.g__Streptococcus_ASV12252	CDKN2B.AS1	-0.220191	0.00574396	0.0876496	included in Figure
f__Lachnospiraceae.g__Blautia_ASV09918	CDKN2B.AS1	0.246902	0.00188836	0.0677546	included in Figure
o__Clostridiales.f__Lachnospiraceae_ASV09113	CTB.31N19.3	-0.213755	0.0073762	0.0903964	included in Figure
g__Bacteroides.s__uniformis_ASV03984	CTB.31N19.3	-0.204527	0.0104334	0.0969941	included in Figure
f__Veillonellaceae.g__Megasphaera_ASV13393	CTB.31N19.3	0.20949	0.00867328	0.0940871	included in Figure
f__.Mogibacteriaceae..g__Mogibacterium_ASV08676	CTB.31N19.3	0.229358	0.003975	0.0827736	included in Figure
f__Campylobacteraceae.g__Campylobacter_ASV05934	CTB.31N19.3	0.246274	0.00194111	0.0677546	included in Figure
g__Bacteroides.s__uniformis_ASV03984	CTB.61M7.2	-0.224017	0.00493432	0.0851978	included in Figure
g__Veillonella.s__dispar_ASV13143	CTB.61M7.2	0.217848	0.00629642	0.0903964	included in Figure
f__.Mogibacteriaceae..g__Mogibacterium_ASV08676	CTB.61M7.2	0.22019	0.00574427	0.0876496	included in Figure
f__Enterococcaceae.g__Enterococcus_ASV13969	CTB.61M7.2	0.224991	0.00474536	0.0851978	included in Figure
f__Streptococcaceae.g__Streptococcus_ASV12252	CTB.61M7.2	0.225907	0.00457352	0.0848765	included in Figure
f__Veillonellaceae.g__Megasphaera_ASV13393	CTB.61M7.2	0.233043	0.00341465	0.0785687	included in Figure
f__Lachnospiraceae.g__Coprococcus_ASV15003	CTD.2555C10.3	-0.246587	0.00191467	0.0677546	included in Figure
f__Lachnospiraceae.g__Blautia_ASV09918	CTD.2555C10.3	-0.243126	0.00222641	0.0685727	included in Figure
f__Coriobacteriaceae.g__Adlercreutzia_ASV10588	CTD.2555C10.3	-0.231713	0.00360815	0.0785687	included in Figure
o__Clostridiales.f__Ruminococcaceae_ASV00145	CTD.2555C10.3	-0.226258	0.00450907	0.0848765	included in Figure
f__.Tissierellaceae..g__Parvimonas_ASV15121	CTD.2555C10.3	-0.221615	0.00542962	0.0876496	included in Figure
o__Clostridiales.f__Ruminococcaceae_ASV13892	CTD.2555C10.3	-0.212149	0.00784264	0.0907285	included in Figure
f__Ruminococcaceae.g__Oscillospira_ASV12634	CTD.2555C10.3	-0.210329	0.00840302	0.093472	included in Figure
o__Clostridiales.f__.Mogibacteriaceae._ASV08647	CTD.2555C10.3	-0.208911	0.00886409	0.0940871	included in Figure
f__Streptococcaceae.g__Streptococcus_ASV12252	CTD.2555C10.3	0.264123	0.000863076	0.0677546	included in Figure
f__Enterococcaceae.g__Enterococcus_ASV13969	GATA6.AS1	-0.264902	0.000831996	0.0677546	included in Figure
f__Lachnospiraceae.g__Coprococcus_ASV15003	GATA6.AS1	0.216826	0.00655193	0.0903964	included in Figure
f__Lachnospiraceae.g__Coprococcus_ASV15011	GATA6.AS1	0.218071	0.00624195	0.0903964	included in Figure
f__Lachnospiraceae.g__Blautia_ASV09918	GATA6.AS1	0.231207	0.0036843	0.0785687	included in Figure
o__Clostridiales.f__Ruminococcaceae_ASV00145	GATA6.AS1	0.231328	0.00366597	0.0785687	included in Figure
o__Clostridiales.f__Ruminococcaceae_ASV13892	GATA6.AS1	0.284849	0.000313233	0.0616026	included in Figure
f__Veillonellaceae.g__Megasphaera_ASV13393	GK.AS1	0.210512	0.00834532	0.093472	included in Figure
g__Veillonella.s__dispar_ASV13143	GK.AS1	0.216458	0.00664611	0.0903964	included in Figure
f__Streptococcaceae.g__Streptococcus_ASV12252	GK.AS1	0.242167	0.00232053	0.0685727	included in Figure
f__.Mogibacteriaceae..g__Mogibacterium_ASV08676	GK.AS1	0.261564	0.000972817	0.0677546	included in Figure
o__Clostridiales.f__Ruminococcaceae_ASV00145	LINC01269	-0.254964	0.00131751	0.0677546	included in Figure
f__.Tissierellaceae..g__Parvimonas_ASV15121	LINC01269	-0.232064	0.00355611	0.0785687	included in Figure
f__Ruminococcaceae.g__Oscillospira_ASV12634	LINC01269	-0.214482	0.007173	0.0903964	included in Figure
o__Clostridiales.f__Ruminococcaceae_ASV13892	LINC01269	-0.214313	0.00721998	0.0903964	included in Figure
o__Clostridiales.f__.Mogibacteriaceae._ASV08647	LINC01269	-0.212812	0.00764707	0.0903964	included in Figure
o__Clostridiales.f__Lachnospiraceae_ASV09113	LINC01269	-0.208201	0.00910287	0.0947769	included in Figure
f__Actinomycetaceae.g__Actinomyces_ASV08375	LINC01269	0.202953	0.0110536	0.0978245	included in Figure
f__Veillonellaceae.g__Megasphaera_ASV13393	LINC01269	0.205777	0.00996256	0.0969941	included in Figure
f__.Mogibacteriaceae..g__Mogibacterium_ASV08676	LINC01269	0.217201	0.00645707	0.0903964	included in Figure
f__Enterococcaceae.g__Enterococcus_ASV13969	LINC01269	0.217324	0.00642635	0.0903964	included in Figure
f__Streptococcaceae.g__Streptococcus_ASV12252	LINC01269	0.259284	0.00108123	0.0677546	included in Figure
o__Clostridiales.f__Ruminococcaceae_ASV00145	LINC01272	-0.261673	0.00096789	0.0677546	included in Figure
o__Clostridiales.f__Ruminococcaceae_ASV13892	LINC01272	-0.234616	0.00319791	0.0785687	included in Figure
g__Alistipes.s__onderdonkii_ASV05119	LINC01272	-0.226809	0.00440971	0.0848765	included in Figure
f__Ruminococcaceae.g__Ruminococcus_ASV08122	LINC01272	-0.226361	0.00449034	0.0848765	included in Figure
o__Clostridiales.f__Lachnospiraceae_ASV09170	LINC01272	-0.220337	0.00571107	0.0876496	included in Figure
g__Bacteroides.s__uniformis_ASV03984	LINC01272	-0.210104	0.00847485	0.093472	included in Figure
f__Bifidobacteriaceae.g__Bifidobacterium_ASV11471	LINC01272	-0.203885	0.0106827	0.0970928	included in Figure
f__Actinomycetaceae.g__Actinomyces_ASV08375	LINC01272	0.221262	0.00550614	0.0876496	included in Figure
g__Veillonella.s__dispar_ASV13143	LINC01272	0.243344	0.00220548	0.0685727	included in Figure
f__.Mogibacteriaceae..g__Mogibacterium_ASV08676	LINC01272	0.259699	0.0010607	0.0677546	included in Figure
f__Streptococcaceae.g__Streptococcus_ASV12252	LINC01272	0.31513	6.1521e-05	0.0276845	included in Figure
f__.Tissierellaceae..g__Parvimonas_ASV15121	LINC01503	-0.240069	0.00253929	0.0691468	included in Figure
o__Clostridiales.f__Ruminococcaceae_ASV13892	LINC01503	-0.236183	0.0029944	0.076813	included in Figure
f__Campylobacteraceae.g__Campylobacter_ASV05934	LINC01503	0.210353	0.00839555	0.093472	included in Figure
f__.Mogibacteriaceae..g__Mogibacterium_ASV08676	LINC01503	0.213238	0.00752354	0.0903964	included in Figure
f__Veillonellaceae.g__Megasphaera_ASV13393	LINC01503	0.239188	0.00263663	0.0700157	included in Figure
f__Lachnospiraceae.g__Blautia_ASV09918	LUCAT1	-0.260342	0.00102962	0.0677546	included in Figure
o__Clostridiales.f__Ruminococcaceae_ASV13892	LUCAT1	-0.225378	0.00467192	0.0851978	included in Figure
f__.Tissierellaceae..g__Parvimonas_ASV15121	LUCAT1	-0.221851	0.00537926	0.0876496	included in Figure
o__Clostridiales.f__Ruminococcaceae_ASV00145	LUCAT1	-0.220196	0.0057429	0.0876496	included in Figure
o__Clostridiales.f__.Mogibacteriaceae._ASV08647	LUCAT1	-0.215767	0.00682639	0.0903964	included in Figure
f__Bifidobacteriaceae.g__Bifidobacterium_ASV11471	LUCAT1	-0.205389	0.0101067	0.0969941	included in Figure
f__Streptococcaceae.g__Streptococcus_ASV12252	LUCAT1	0.212497	0.00773944	0.0903964	included in Figure
f__Actinomycetaceae.g__Actinomyces_ASV08375	LUCAT1	0.232722	0.00346035	0.0785687	included in Figure
g__Bacteroides.s__uniformis_ASV03984	MIR3945HG	-0.240837	0.00245716	0.0685727	included in Figure
o__Clostridiales.f__Ruminococcaceae_ASV00145	MIR3945HG	-0.204157	0.0105762	0.0969941	included in Figure
f__.Tissierellaceae..g__Parvimonas_ASV15121	MIR4435.2HG	-0.258893	0.00110087	0.0677546	included in Figure
f__Lachnospiraceae.g__Blautia_ASV09918	MIR4435.2HG	-0.256481	0.00122964	0.0677546	included in Figure
o__Clostridiales.f__Ruminococcaceae_ASV13892	MIR4435.2HG	-0.252122	0.0014977	0.0677546	included in Figure
f__Ruminococcaceae.g__Ruminococcus_ASV08122	MIR4435.2HG	-0.248165	0.00178615	0.0677546	included in Figure
f__Lachnospiraceae.g__Blautia_ASV09078	MIR4435.2HG	-0.216405	0.00665977	0.0903964	included in Figure
f__Bifidobacteriaceae.g__Bifidobacterium_ASV11471	MIR4435.2HG	-0.208563	0.00898032	0.0940871	included in Figure
o__Clostridiales.f__Lachnospiraceae_ASV08984	MIR503HG	-0.258085	0.00114255	0.0677546	included in Figure
f__Lachnospiraceae.g__Blautia_ASV09918	MIR503HG	-0.253249	0.00142372	0.0677546	included in Figure
o__Clostridiales.f__Lachnospiraceae_ASV10079	MIR503HG	-0.242085	0.00232877	0.0685727	included in Figure
o__Clostridiales.f__Ruminococcaceae_ASV13892	MIR503HG	-0.240626	0.00247947	0.0685727	included in Figure
g__Roseburia.s__faecis_ASV15263	MIR503HG	-0.235491	0.00308274	0.0779493	included in Figure
f__Ruminococcaceae.g__Ruminococcus_ASV08122	MIR503HG	-0.222461	0.00525046	0.0876496	included in Figure
o__Clostridiales.f__Lachnospiraceae_ASV14891	MIR503HG	-0.210018	0.00850226	0.093472	included in Figure
f__.Tissierellaceae..g__Parvimonas_ASV15121	MIR503HG	-0.2074	0.00937968	0.0948552	included in Figure
o__Clostridiales.f__.Mogibacteriaceae._ASV08647	MIR503HG	-0.206493	0.00970162	0.0959322	included in Figure
g__Roseburia.s__faecis_ASV15263	RP1.170O19.14	0.215477	0.00690333	0.0903964	included in Figure
f__Bifidobacteriaceae.g__Bifidobacterium_ASV11471	RP1.170O19.14	0.240696	0.00247208	0.0685727	included in Figure
f__Lachnospiraceae.g__Blautia_ASV09078	RP1.170O19.14	0.246143	0.00195225	0.0677546	included in Figure
g__Bacteroides.s__uniformis_ASV03984	RP1.170O19.14	0.248299	0.0017756	0.0677546	included in Figure
f__Lachnospiraceae.g__Coprococcus_ASV15003	RP1.170O19.14	0.252464	0.00147484	0.0677546	included in Figure
f__Clostridiaceae.g__Clostridium_ASV12376	RP1.170O19.14	0.257024	0.00119949	0.0677546	included in Figure
f__Lachnospiraceae.g__Blautia_ASV09918	RP1.170O19.14	0.281713	0.000367009	0.0649606	included in Figure
f__Bifidobacteriaceae.g__Bifidobacterium_ASV11471	RP1.261G23.7	-0.29901	0.000149604	0.0378285	included in Figure
f__Lachnospiraceae.g__Blautia_ASV09918	RP1.261G23.7	-0.217798	0.00630876	0.0903964	included in Figure
g__Faecalibacterium.s__prausnitzii_ASV00156	RP1.261G23.7	-0.214274	0.00723068	0.0903964	included in Figure
o__Clostridiales.f__Lachnospiraceae_ASV08984	RP1.261G23.7	-0.208796	0.0089024	0.0940871	included in Figure
g__Clostridium.s__clostridioforme_ASV09123	RP1.261G23.7	-0.204326	0.0105106	0.0969941	included in Figure
o__Clostridiales.f__Ruminococcaceae_ASV00145	RP11.20I20.4	-0.212676	0.00768675	0.0903964	included in Figure
c__Clostridia.o__Clostridiales_ASV08574	RP11.20I20.4	-0.207251	0.00943193	0.0948552	included in Figure
f__Streptococcaceae.g__Streptococcus_ASV12252	RP11.20I20.4	0.203017	0.0110277	0.0978245	included in Figure
f__Actinomycetaceae.g__Actinomyces_ASV08375	RP11.20I20.4	0.215754	0.00682977	0.0903964	included in Figure
f__Campylobacteraceae.g__Campylobacter_ASV05934	RP11.20I20.4	0.222805	0.00517894	0.0876496	included in Figure
f__.Mogibacteriaceae..g__Mogibacterium_ASV08676	RP11.20I20.4	0.224208	0.00489675	0.0851978	included in Figure
f__Veillonellaceae.g__Megasphaera_ASV13393	RP11.20I20.4	0.225745	0.00460347	0.0848765	included in Figure
f__Ruminococcaceae.g__Oscillospira_ASV13741	RP11.211G3.2	-0.208554	0.00898346	0.0940871	included in Figure
f__Streptococcaceae.g__Streptococcus_ASV12252	RP11.211G3.2	0.214497	0.00716894	0.0903964	included in Figure
f__Lachnospiraceae.g__Blautia_ASV09078	RP11.242C19.2	-0.211059	0.0081743	0.0927468	included in Figure
f__Veillonellaceae.g__Megasphaera_ASV13393	RP11.33O4.1	-0.250672	0.00159808	0.0677546	included in Figure
f__Actinomycetaceae.g__Actinomyces_ASV08375	RP11.33O4.1	-0.217869	0.00629129	0.0903964	included in Figure
f__Campylobacteraceae.g__Campylobacter_ASV05934	RP11.33O4.1	-0.217621	0.00635241	0.0903964	included in Figure
f__Coriobacteriaceae.g__Adlercreutzia_ASV10588	RP11.33O4.1	0.204228	0.0105487	0.0969941	included in Figure
o__Clostridiales.f__Ruminococcaceae_ASV00145	RP11.33O4.1	0.204716	0.0103607	0.0969941	included in Figure
o__Clostridiales.f__Lachnospiraceae_ASV09113	RP11.33O4.1	0.212986	0.00759636	0.0903964	included in Figure
o__Clostridiales.f__Ruminococcaceae_ASV13892	RP11.33O4.1	0.215126	0.00699742	0.0903964	included in Figure
f__Lachnospiraceae.g__Blautia_ASV09918	RP11.33O4.1	0.300473	0.000138309	0.0378285	included in Figure
f__Campylobacteraceae.g__Campylobacter_ASV05934	RP11.347C18.3	0.227799	0.00423606	0.0848377	included in Figure
f__Streptococcaceae.g__Streptococcus_ASV12252	RP11.347C18.3	0.246429	0.00192792	0.0677546	included in Figure
f__Campylobacteraceae.g__Campylobacter_ASV05934	RP11.380P13.1	-0.224368	0.00486548	0.0851978	included in Figure
f__Veillonellaceae.g__Megasphaera_ASV13393	RP11.380P13.1	-0.207334	0.00940267	0.0948552	included in Figure
f__Lachnospiraceae.g__Coprococcus_ASV15011	RP11.380P13.1	0.213129	0.00755502	0.0903964	included in Figure
f__Lachnospiraceae.g__Coprococcus_ASV15003	RP11.380P13.1	0.220965	0.00557113	0.0876496	included in Figure
o__Coriobacteriales.f__Coriobacteriaceae_ASV10586	RP11.380P13.1	0.243086	0.00223022	0.0685727	included in Figure
o__Clostridiales.f__Ruminococcaceae_ASV13892	RP11.380P13.1	0.249304	0.00169833	0.0677546	included in Figure
f__Lachnospiraceae.g__Blautia_ASV09918	RP11.380P13.1	0.267009	0.000753022	0.0677546	included in Figure
f__Enterococcaceae.g__Enterococcus_ASV13969	RP11.396O20.2	-0.231976	0.003569	0.0785687	included in Figure
f__Lachnospiraceae.g__Blautia_ASV09918	RP11.396O20.2	0.206986	0.00952539	0.0952539	included in Figure
f__Streptococcaceae.g__Streptococcus_ASV12252	RP11.482G13.1	0.228553	0.00410796	0.0835758	included in Figure
f__.Mogibacteriaceae..g__Mogibacterium_ASV08676	RP11.482G13.1	0.248369	0.00177013	0.0677546	included in Figure
f__Ruminococcaceae.g__Oscillospira_ASV13741	SH3RF3.AS1	-0.213609	0.00741744	0.0903964	included in Figure
f__Ruminococcaceae.g__Ruminococcus_ASV08122	ST3GAL4.AS1	-0.251682	0.00152755	0.0677546	included in Figure
f__Lachnospiraceae.g__Blautia_ASV09078	ST3GAL4.AS1	-0.231651	0.00361737	0.0785687	included in Figure
f__Lachnospiraceae.g__Blautia_ASV09918	ST3GAL4.AS1	-0.223898	0.00495784	0.0851978	included in Figure
f__Ruminococcaceae.g__Ruminococcus_ASV07554	ST3GAL4.AS1	-0.219722	0.00585104	0.0885158	included in Figure
f__Lachnospiraceae.g__Anaerostipes_ASV15075	ST3GAL4.AS1	-0.211943	0.00790444	0.0908497	included in Figure
g__Bacteroides.s__uniformis_ASV03984	ST3GAL4.AS1	-0.208004	0.00917029	0.0948552	included in Figure
f__Lachnospiraceae.g__Roseburia_ASV15174	ST3GAL4.AS1	-0.20242	0.0112709	0.0992511	included in Figure
f__.Mogibacteriaceae..g__Mogibacterium_ASV08676	ST3GAL4.AS1	0.238493	0.00271579	0.0706903	included in Figure
f__Veillonellaceae.g__Megasphaera_ASV13393	ST3GAL4.AS1	0.241407	0.00239776	0.0685727	included in Figure
f__Streptococcaceae.g__Streptococcus_ASV12252	ST3GAL4.AS1	0.252668	0.00146141	0.0677546	included in Figure
f__Campylobacteraceae.g__Campylobacter_ASV05934	ST3GAL4.AS1	0.259758	0.00105781	0.0677546	included in Figure
f__Streptococcaceae.g__Streptococcus_ASV12252	WNT5A.AS1	0.208582	0.00897407	0.0940871	included in Figure
f__Streptococcaceae.g__Streptococcus_ASV12252	ZIM2.AS1	-0.239066	0.00265031	0.0700157	included in Figure
f__Enterococcaceae.g__Enterococcus_ASV13969	ZIM2.AS1	-0.226133	0.0045319	0.0848765	included in Figure
f__Coriobacteriaceae.g__Adlercreutzia_ASV10588	ZIM2.AS1	0.204309	0.0105173	0.0969941	included in Figure
g__Alistipes.s__onderdonkii_ASV05119	ZIM2.AS1	0.205641	0.0100129	0.0969941	included in Figure
f__Lachnospiraceae.g__Coprococcus_ASV10209	ZIM2.AS1	0.221408	0.00547436	0.0876496	included in Figure
o__Clostridiales.f__Ruminococcaceae_ASV00145	ZIM2.AS1	0.226729	0.00442398	0.0848765	included in Figure
o__Clostridiales.f__.Mogibacteriaceae._ASV08690	ZIM2.AS1	0.227627	0.00426585	0.0848377	included in Figure
f__Lachnospiraceae.g__Coprococcus_ASV15003	ZIM2.AS1	0.228661	0.00408992	0.0835758	included in Figure
f__Lachnospiraceae.g__Blautia_ASV09918	ZIM2.AS1	0.242452	0.00229219	0.0685727	included in Figure
f__Lachnospiraceae.g__Dorea_ASV15355	ZIM2.AS1	0.244482	0.00209915	0.0685727	included in Figure
f__Lachnospiraceae.g__Anaerostipes_ASV15075	ZIM2.AS1	0.255137	0.00130717	0.0677546	included in Figure
o__Clostridiales.f__Ruminococcaceae_ASV13892	ZIM2.AS1	0.310868	7.82048e-05	0.0276845	included in Figure
f__Fusobacteriaceae.g__Fusobacterium_ASV15522	RP11.380P13.1	-0.201823	0.0115188	0.100932
g__Veillonella.s__parvula_ASV13157	RP11.482G13.1	0.20113	0.0118127	0.102997
f__Ruminococcaceae.g__Ruminococcus_ASV08122	CCAT1	-0.199485	0.0125366	0.104093
f__Ruminococcaceae.g__Ruminococcus_ASV08122	RP1.170O19.14	0.199266	0.0126355	0.104093
f__Actinomycetaceae.g__Actinomyces_ASV08375	B3GALT5.AS1	-0.200347	0.0121522	0.104093
c__Clostridia.o__Clostridiales_ASV08574	ST3GAL4.AS1	-0.200038	0.0122888	0.104093
c__Clostridia.o__Clostridiales_ASV08574	MIR503HG	-0.199874	0.0123619	0.104093
f__.Mogibacteriaceae..g__Mogibacterium_ASV08676	RP11.380P13.1	-0.199408	0.0125713	0.104093
f__Bifidobacteriaceae.g__Bifidobacterium_ASV11471	CTB.31N19.3	-0.19928	0.0126291	0.104093
f__Bifidobacteriaceae.g__Bifidobacterium_ASV11471	B3GALT5.AS1	0.198885	0.01281	0.104093
f__Streptococcaceae.g__Streptococcus_ASV12252	RP11.396O20.2	-0.199081	0.0127198	0.104093
f__Streptococcaceae.g__Streptococcus_ASV12252	RP11.33O4.1	-0.198862	0.0128205	0.104093
o__Clostridiales.f__Ruminococcaceae_ASV13892	MIR3945HG	-0.200529	0.0120729	0.104093
o__Clostridiales.f__Ruminococcaceae_ASV13892	B3GALT5.AS1	0.200485	0.0120919	0.104093
o__Clostridiales.f__Ruminococcaceae_ASV13892	RP1.170O19.14	0.199794	0.0123975	0.104093
f__Lachnospiraceae.g__Coprococcus_ASV15003	RP11.33O4.1	0.198992	0.0127606	0.104093
f__Lachnospiraceae.g__Dorea_ASV15355	CTD.2555C10.3	-0.19946	0.0125478	0.104093
o__Clostridiales.f__Ruminococcaceae_ASV00145	CTB.61M7.2	-0.196038	0.0141801	0.105505
f__Campylobacteraceae.g__Campylobacter_ASV05934	CDKN2B.AS1	-0.197738	0.0133471	0.105505
f__.Mogibacteriaceae..g__Mogibacterium_ASV08676	B3GALT5.AS1	-0.196169	0.0141144	0.105505
o__Clostridiales.f__Lachnospiraceae_ASV09113	RP11.20I20.4	-0.196339	0.0140293	0.105505
o__Clostridiales.f__Lachnospiraceae_ASV09113	MIR503HG	-0.196025	0.0141865	0.105505
o__Clostridiales.f__Lachnospiraceae_ASV09977	CTB.31N19.3	-0.197018	0.0136947	0.105505
f__Bifidobacteriaceae.g__Bifidobacterium_ASV11471	CCAT1	-0.19668	0.0138605	0.105505
f__Bifidobacteriaceae.g__Bifidobacterium_ASV11471	LINC01503	-0.196813	0.0137951	0.105505
f__Bifidobacteriaceae.g__Bifidobacterium_ASV11471	RP11.242C19.2	-0.197355	0.013531	0.105505
f__Streptococcaceae.g__Streptococcus_ASV12252	LINC01503	0.196324	0.0140369	0.105505
f__Clostridiaceae.g__Clostridium_ASV12376	CCAT1	-0.197717	0.0133572	0.105505
f__Clostridiaceae.g__Clostridium_ASV12376	RP11.33O4.1	0.197269	0.0135724	0.105505
g__Veillonella.s__dispar_ASV13143	RP11.482G13.1	0.196039	0.0141798	0.105505
f__Veillonellaceae.g__Megasphaera_ASV13393	RP11.396O20.2	-0.198103	0.0131739	0.105505
f__Veillonellaceae.g__Megasphaera_ASV13393	LUCAT1	0.196709	0.0138459	0.105505
f__Enterococcaceae.g__Enterococcus_ASV13969	MIR503HG	0.197962	0.0132407	0.105505
f__Lachnospiraceae.g__Coprococcus_ASV15003	LUCAT1	-0.196977	0.0137146	0.105505
f__Lachnospiraceae.g__Coprococcus_ASV15003	LINC01269	-0.197171	0.0136203	0.105505
f__Lachnospiraceae.g__Coprococcus_ASV15011	RP1.170O19.14	0.197075	0.0136669	0.105505
g__Roseburia.s__faecis_ASV15263	B3GALT5.AS1	0.198079	0.0131855	0.105505
g__Faecalibacterium.s__prausnitzii_ASV00156	ST3GAL4.AS1	-0.19578	0.0143106	0.105982
g__Clostridium.s__clostridioforme_ASV09123	MIR4435.2HG	-0.19553	0.0144377	0.106289
o__Clostridiales.f__Ruminococcaceae_ASV13892	RP11.396O20.2	0.195345	0.0145322	0.106289
f__Lachnospiraceae.g__Coprococcus_ASV15011	CTD.2555C10.3	-0.195356	0.0145266	0.106289
g__Veillonella.s__dispar_ASV13143	RP11.242C19.2	0.195029	0.0146954	0.107041
f__Lachnospiraceae.g__Blautia_ASV09078	RP1.261G23.7	-0.194537	0.0149526	0.108025
f__Veillonellaceae.g__Megasphaera_ASV13393	CDKN2B.AS1	-0.19454	0.0149511	0.108025
f__Lachnospiraceae.g__Blautia_ASV09078	CTD.2555C10.3	-0.194116	0.0151758	0.109192
o__Clostridiales.f__Lachnospiraceae_ASV08865	CCAT1	-0.19398	0.0152485	0.109271
f__Veillonellaceae.g__Megasphaera_ASV13393	CTD.2555C10.3	0.193739	0.0153783	0.109756
f__Lachnospiraceae.g__Blautia_ASV09594	AGAP2.AS1	-0.193416	0.0155534	0.110561
f__Lachnospiraceae.g__Blautia_ASV09078	RP11.347C18.3	-0.193258	0.0156398	0.11073
f__Lachnospiraceae.g__Coprococcus_ASV15003	RP11.211G3.2	-0.193031	0.0157648	0.11117
g__Alistipes.s__onderdonkii_ASV05119	CCAT1	-0.192831	0.0158754	0.111506
g__Bacteroides.s__uniformis_ASV03984	RP11.33O4.1	0.192156	0.0162537	0.111655
f__Lachnospiraceae.g__Blautia_ASV09078	MIR503HG	-0.192378	0.0161287	0.111655
f__Bifidobacteriaceae.g__Bifidobacterium_ASV11471	WNT5A.AS1	-0.192007	0.0163382	0.111655
f__Clostridiaceae.g__Clostridium_ASV12376	B3GALT5.AS1	0.192534	0.0160409	0.111655
g__Veillonella.s__dispar_ASV13143	LUCAT1	0.192191	0.0162338	0.111655
f__Lachnospiraceae.g__Coprococcus_ASV15011	MIR4435.2HG	-0.192025	0.0163283	0.111655
f__Fusobacteriaceae.g__Fusobacterium_ASV15522	MIR4435.2HG	0.192657	0.015972	0.111655
f__Actinomycetaceae.g__Actinomyces_ASV08375	CTD.2555C10.3	0.191661	0.0165365	0.111716
g__Veillonella.s__dispar_ASV13143	SH3RF3.AS1	0.191743	0.0164892	0.111716
o__Clostridiales.f__Ruminococcaceae_ASV13704	CTD.2555C10.3	-0.1917	0.0165139	0.111716
g__Bacteroides.s__uniformis_ASV03984	GATA6.AS1	0.191276	0.0167593	0.111943
f__Actinomycetaceae.g__Actinomyces_ASV08375	CTB.31N19.3	0.191058	0.0168863	0.111943
o__Clostridiales.f__Lachnospiraceae_ASV08865	LINC01272	-0.191231	0.0167853	0.111943
o__Clostridiales.f__Ruminococcaceae_ASV13704	RP11.347C18.3	-0.19108	0.0168732	0.111943
f__Erysipelotrichaceae.g__Holdemania_ASV14231	MIR4435.2HG	-0.191295	0.0167482	0.111943
f__Ruminococcaceae.g__Ruminococcus_ASV07554	RP1.170O19.14	0.190876	0.0169932	0.112021
f__Lachnospiraceae.g__Blautia_ASV09918	CTB.31N19.3	-0.190753	0.0170657	0.112021
g__Roseburia.s__faecis_ASV15263	ZIM2.AS1	0.190715	0.0170879	0.112021
g__Haemophilus.s__parainfluenzae_ASV06380	LINC01272	0.190371	0.017293	0.112947
f__Actinomycetaceae.g__Actinomyces_ASV08375	RP11.482G13.1	0.190195	0.0173984	0.113218
o__Clostridiales.f__Ruminococcaceae_ASV13892	CDKN2B.AS1	0.189882	0.0175874	0.114029
f__Lachnospiraceae.g__Coprococcus_ASV15003	CTB.61M7.2	-0.189718	0.0176874	0.114258
f__.Paraprevotellaceae..g__Paraprevotella_ASV02736	LINC01269	-0.188407	0.0185021	0.118916
f__.Paraprevotellaceae..g__Paraprevotella_ASV02736	WNT5A.AS1	-0.188132	0.0186773	0.118916
f__Campylobacteraceae.g__Campylobacter_ASV05934	ZIM2.AS1	-0.188255	0.0185985	0.118916
c__Clostridia.o__Clostridiales_ASV08574	RP1.261G23.7	-0.188179	0.0186471	0.118916
f__Actinomycetaceae.g__Actinomyces_ASV08375	RP1.170O19.14	-0.187905	0.0188225	0.118985
f__Bifidobacteriaceae.g__Bifidobacterium_ASV11471	GATA6.AS1	0.187952	0.0187926	0.118985
f__Veillonellaceae.g__Megasphaera_ASV13393	RP11.211G3.2	0.18752	0.0190717	0.120131
f__Ruminococcaceae.g__Oscillospira_ASV13659	CTD.2555C10.3	-0.187291	0.0192218	0.1206
o__Clostridiales.f__Lachnospiraceae_ASV14891	CTD.2555C10.3	-0.187198	0.0192823	0.1206
o__Clostridiales.f__Lachnospiraceae_ASV10079	ST3GAL4.AS1	-0.18687	0.0194993	0.121527
o__Clostridiales.f__Lachnospiraceae_ASV08865	AGAP2.AS1	-0.186425	0.0197965	0.122946
f__Actinomycetaceae.g__Actinomyces_ASV08375	GK.AS1	0.185995	0.0200872	0.123883
g__Veillonella.s__dispar_ASV13143	MIR503HG	0.186022	0.0200686	0.123883
f__Lachnospiraceae.g__Blautia_ASV09078	CTB.31N19.3	-0.18579	0.020227	0.124311
f__Veillonellaceae.g__Megasphaera_ASV13393	MIR4435.2HG	0.185649	0.0203236	0.124474
f__Lachnospiraceae.g__Blautia_ASV09918	RP11.242C19.2	-0.185254	0.0205972	0.125714
g__Haemophilus.s__parainfluenzae_ASV06380	LINC01503	0.184734	0.0209614	0.125769
f__.Mogibacteriaceae..g__Mogibacterium_ASV08676	MIR4435.2HG	0.184839	0.0208877	0.125769
f__Lachnospiraceae.g__Blautia_ASV09078	RP11.33O4.1	0.184753	0.0209478	0.125769
o__Clostridiales.f__Lachnospiraceae_ASV09170	ZIM2.AS1	0.185085	0.0207152	0.125769
f__Lachnospiraceae.g__Coprococcus_ASV15003	RP11.347C18.3	-0.184887	0.020854	0.125769
o__Clostridiales.f__Lachnospiraceae_ASV09977	CCAT1	-0.184622	0.0210404	0.125816
f__.Tissierellaceae..g__Parvimonas_ASV15121	ZIM2.AS1	0.184266	0.0212939	0.126903
o__Clostridiales.f__Lachnospiraceae_ASV08865	SH3RF3.AS1	-0.183936	0.0215314	0.12746
g__Veillonella.s__parvula_ASV13157	LINC01272	0.184023	0.021469	0.12746
g__Bacteroides.s__uniformis_ASV03984	RP11.482G13.1	-0.183777	0.0216469	0.127717
f__Ruminococcaceae.g__Oscillospira_ASV13659	AGAP2.AS1	-0.183254	0.0220291	0.12954
f__Streptococcaceae.g__Streptococcus_ASV12252	RP11.380P13.1	-0.182931	0.0222686	0.130313
o__Clostridiales.f__Ruminococcaceae_ASV13704	LINC01272	-0.182878	0.0223078	0.130313
f__Ruminococcaceae.g__Ruminococcus_ASV07554	AGAP2.AS1	-0.181794	0.0231288	0.131212
f__Actinomycetaceae.g__Actinomyces_ASV08375	LINC01503	0.18223	0.0227957	0.131212
o__Clostridiales.f__.Mogibacteriaceae._ASV08647	AGAP2.AS1	-0.182064	0.0229215	0.131212
f__.Mogibacteriaceae..g__Mogibacterium_ASV08676	RP11.33O4.1	-0.181888	0.023056	0.131212
f__Lachnospiraceae.g__Blautia_ASV09078	RP11.380P13.1	0.18239	0.0226741	0.131212
o__Clostridiales.f__Lachnospiraceae_ASV09113	LINC01272	-0.182073	0.0229147	0.131212
f__Veillonellaceae.g__Megasphaera_ASV13393	LINC01272	0.182139	0.0228644	0.131212
f__Lachnospiraceae.g__Anaerostipes_ASV15075	RP1.170O19.14	0.181908	0.023041	0.131212
f__Lachnospiraceae.g__Dorea_ASV15355	RP11.380P13.1	0.181974	0.0229908	0.131212
f__Enterococcaceae.g__Enterococcus_ASV13969	RP11.380P13.1	-0.181447	0.0233964	0.132306
o__Clostridiales.f__.Mogibacteriaceae._ASV08647	RP11.211G3.2	-0.180914	0.0238136	0.132813
o__Clostridiales.f__Lachnospiraceae_ASV08984	RP11.20I20.4	-0.180977	0.0237642	0.132813
f__Bifidobacteriaceae.g__Bifidobacterium_ASV11471	RP11.482G13.1	-0.180853	0.0238614	0.132813
f__Lachnospiraceae.g__Anaerostipes_ASV15075	RP11.33O4.1	0.181135	0.0236396	0.132813
f__Fusobacteriaceae.g__Fusobacterium_ASV15520	RP1.170O19.14	-0.18118	0.0236049	0.132813
g__Faecalibacterium.s__prausnitzii_ASV00156	CTB.31N19.3	-0.180377	0.0242396	0.133437
f__.Paraprevotellaceae..g__Paraprevotella_ASV02736	SH3RF3.AS1	-0.180333	0.024275	0.133437
f__Streptococcaceae.g__Streptococcus_ASV12252	RP11.242C19.2	0.180395	0.0242252	0.133437
f__.Tissierellaceae..g__Parvimonas_ASV15121	RP11.347C18.3	-0.180577	0.0240802	0.133437
o__Clostridiales.f__Ruminococcaceae_ASV00145	LINC01503	-0.179938	0.0245932	0.133527
o__Clostridiales.f__Lachnospiraceae_ASV09113	ST3GAL4.AS1	-0.17997	0.0245674	0.133527
o__Clostridiales.f__Lachnospiraceae_ASV10079	CTB.31N19.3	-0.179943	0.0245897	0.133527
f__Lachnospiraceae.g__Anaerostipes_ASV15075	CTD.2555C10.3	-0.179984	0.024556	0.133527
g__Clostridium.s__clostridioforme_ASV09123	ST3GAL4.AS1	-0.179555	0.0249052	0.134501
f__Veillonellaceae.g__Megasphaera_ASV13393	AGAP2.AS1	0.179532	0.0249246	0.134501
f__Ruminococcaceae.g__Ruminococcus_ASV07554	CTB.31N19.3	-0.178908	0.0254401	0.135068
f__.Mogibacteriaceae..g__Mogibacterium_ASV08676	RP11.211G3.2	0.17876	0.0255637	0.135068
f__Coriobacteriaceae.g__Adlercreutzia_ASV10589	CTB.31N19.3	-0.179137	0.0252497	0.135068
f__Bifidobacteriaceae.g__Bifidobacterium_ASV11471	ST3GAL4.AS1	-0.178832	0.025504	0.135068
f__Streptococcaceae.g__Streptococcus_ASV12252	CTB.31N19.3	0.179265	0.0251442	0.135068
g__Veillonella.s__dispar_ASV13143	MIR4435.2HG	0.178986	0.0253757	0.135068
o__Clostridiales.f__Ruminococcaceae_ASV13892	SH3RF3.AS1	-0.178876	0.0254671	0.135068
f__.Paraprevotellaceae..g__Paraprevotella_ASV02736	CTB.31N19.3	-0.178113	0.0261108	0.136587
f__.Paraprevotellaceae..g__Paraprevotella_ASV02736	RP1.261G23.7	-0.177084	0.0270015	0.136587
f__Actinomycetaceae.g__Actinomyces_ASV08375	CDKN2B.AS1	-0.177404	0.026722	0.136587
c__Clostridia.o__Clostridiales_ASV08574	RP11.33O4.1	0.176813	0.0272401	0.136587
o__Clostridiales.f__.Mogibacteriaceae._ASV08647	MIR3945HG	-0.177812	0.0263691	0.136587
o__Clostridiales.f__Lachnospiraceae_ASV09113	B3GALT5.AS1	0.176876	0.0271841	0.136587
g__Clostridium.s__clostridioforme_ASV09123	CTB.31N19.3	-0.177424	0.0267043	0.136587
g__Clostridium.s__clostridioforme_ASV09123	B3GALT5.AS1	0.177115	0.0269742	0.136587
f__Lachnospiraceae.g__Blautia_ASV09918	LINC01503	-0.177683	0.02648	0.136587
o__Coriobacteriales.f__Coriobacteriaceae_ASV10586	CCAT1	-0.17767	0.0264912	0.136587
f__Streptococcaceae.g__Streptococcus_ASV12252	RP1.170O19.14	-0.176835	0.0272209	0.136587
f__Clostridiaceae.g__Clostridium_ASV12376	ST3GAL4.AS1	-0.17684	0.027216	0.136587
f__Clostridiaceae.g__Clostridium_ASV12376	ZIM2.AS1	0.177731	0.0264387	0.136587
f__Ruminococcaceae.g__Oscillospira_ASV12634	ZIM2.AS1	0.17683	0.0272251	0.136587
f__Enterococcaceae.g__Enterococcus_ASV13969	CTD.2555C10.3	0.177857	0.0263302	0.136587
g__Roseburia.s__faecis_ASV15263	ST3GAL4.AS1	-0.177848	0.0263382	0.136587
g__Roseburia.s__faecis_ASV15263	CTD.2555C10.3	-0.178103	0.0261194	0.136587
f__Lachnospiraceae.g__Dorea_ASV15355	RP11.20I20.4	-0.176837	0.0272187	0.136587
f__Enterococcaceae.g__Enterococcus_ASV13969	MIR3945HG	0.17664	0.0273932	0.136966
o__Clostridiales.f__Ruminococcaceae_ASV00145	CTB.31N19.3	-0.176421	0.0275888	0.137555
g__Alistipes.s__onderdonkii_ASV05119	MIR3945HG	-0.175642	0.0282926	0.137577
f__Campylobacteraceae.g__Campylobacter_ASV05934	CCAT1	0.175725	0.0282174	0.137577
g__Haemophilus.s__parainfluenzae_ASV06380	RP11.211G3.2	0.175928	0.0280321	0.137577
f__Actinomycetaceae.g__Actinomyces_ASV08375	ST3GAL4.AS1	0.17571	0.0282302	0.137577
o__Clostridiales.f__Lachnospiraceae_ASV08984	CTB.61M7.2	-0.175753	0.0281914	0.137577
f__Lachnospiraceae.g__Blautia_ASV09918	RP11.347C18.3	-0.175744	0.0281993	0.137577
f__Coriobacteriaceae.g__Adlercreutzia_ASV10589	RP1.261G23.7	-0.175782	0.0281653	0.137577
f__Bifidobacteriaceae.g__Bifidobacterium_ASV11471	CDKN2B.AS1	0.17623	0.02776	0.137577
g__Veillonella.s__parvula_ASV13157	CTB.61M7.2	0.175774	0.0281721	0.137577
g__Alistipes.s__onderdonkii_ASV05119	LINC01269	-0.175096	0.0287955	0.138584
f__Lachnospiraceae.g__Blautia_ASV09078	AGAP2.AS1	-0.175215	0.028685	0.138584
f__Lachnospiraceae.g__Coprococcus_ASV15003	MIR4435.2HG	-0.175077	0.0288129	0.138584
f__.Tissierellaceae..g__Parvimonas_ASV15121	CTB.61M7.2	-0.175122	0.0287716	0.138584
o__Clostridiales.f__Lachnospiraceae_ASV08865	LINC01269	-0.174963	0.0289185	0.138715
f__.Tissierellaceae..g__Parvimonas_ASV15121	B3GALT5.AS1	0.174502	0.0293507	0.140407
o__Clostridiales.f__Ruminococcaceae_ASV00145	MIR503HG	-0.174228	0.0296094	0.140684
f__Ruminococcaceae.g__Ruminococcus_ASV07554	LINC01503	-0.174022	0.0298059	0.140684
o__Clostridiales.f__Lachnospiraceae_ASV09170	RP11.20I20.4	-0.174066	0.0297643	0.140684
f__Lachnospiraceae.g__Blautia_ASV09594	CCAT1	-0.17404	0.0297886	0.140684
f__Coriobacteriaceae.g__Adlercreutzia_ASV10588	B3GALT5.AS1	0.174156	0.0296784	0.140684
g__Alistipes.s__onderdonkii_ASV05119	CTB.61M7.2	-0.173575	0.0302351	0.141096
f__Ruminococcaceae.g__Ruminococcus_ASV07554	RP11.211G3.2	-0.173526	0.030283	0.141096
f__Ruminococcaceae.g__Ruminococcus_ASV08122	RP11.380P13.1	0.173626	0.0301858	0.141096
o__Clostridiales.f__Lachnospiraceae_ASV09170	MIR503HG	-0.173517	0.0302918	0.141096
g__Veillonella.s__dispar_ASV13143	RP1.170O19.14	-0.173523	0.0302861	0.141096
f__Lachnospiraceae.g__Dorea_ASV15355	CCAT1	-0.173245	0.0305564	0.141955
f__Ruminococcaceae.g__Ruminococcus_ASV07554	RP11.347C18.3	-0.173078	0.0307196	0.141968
f__.Mogibacteriaceae..g__Mogibacterium_ASV08676	CDKN2B.AS1	-0.173085	0.0307127	0.141968
f__Campylobacteraceae.g__Campylobacter_ASV05934	RP1.170O19.14	-0.172387	0.0314028	0.142785
f__Ruminococcaceae.g__Ruminococcus_ASV08122	ZIM2.AS1	0.1728	0.0309926	0.142785
c__Clostridia.o__Clostridiales_ASV08574	CCAT1	-0.172174	0.0316156	0.142785
c__Clostridia.o__Clostridiales_ASV08574	RP11.482G13.1	-0.172636	0.0311551	0.142785
c__Clostridia.o__Clostridiales_ASV08574	MIR4435.2HG	-0.17201	0.0317809	0.142785
g__Blautia.s__obeum_ASV09003	RP1.170O19.14	0.171999	0.0317915	0.142785
f__Lachnospiraceae.g__Blautia_ASV09918	RP11.20I20.4	-0.171927	0.0318643	0.142785
o__Clostridiales.f__Lachnospiraceae_ASV09977	RP11.33O4.1	0.171963	0.0318282	0.142785
o__Clostridiales.f__Lachnospiraceae_ASV09977	LINC01272	-0.172306	0.0314835	0.142785
f__Bifidobacteriaceae.g__Bifidobacterium_ASV11471	GK.AS1	-0.172606	0.0311844	0.142785
f__Clostridiaceae.g__Clostridium_ASV12376	MIR3945HG	-0.172283	0.0315065	0.142785
f__Clostridiaceae.g__Clostridium_ASV12376	CTB.31N19.3	-0.171987	0.0318043	0.142785
g__Haemophilus.s__parainfluenzae_ASV06380	WNT5A.AS1	0.171713	0.032082	0.143003
f__Ruminococcaceae.g__Ruminococcus_ASV07554	LINC01272	-0.171467	0.0323323	0.143003
f__.Mogibacteriaceae..g__Mogibacterium_ASV08676	RP11.242C19.2	0.171385	0.0324167	0.143003
o__Clostridiales.f__Lachnospiraceae_ASV08984	MIR4435.2HG	-0.171397	0.032404	0.143003
f__Lachnospiraceae.g__Blautia_ASV09078	RP11.20I20.4	-0.171263	0.0325423	0.143003
g__Veillonella.s__parvula_ASV13157	RP11.211G3.2	0.171246	0.0325593	0.143003
f__Veillonellaceae.g__Megasphaera_ASV13393	RP11.347C18.3	0.17126	0.0325453	0.143003
f__Lachnospiraceae.g__Anaerostipes_ASV15075	CTB.61M7.2	-0.171692	0.0321025	0.143003
f__Lachnospiraceae.g__Dorea_ASV15355	LINC01272	-0.171101	0.0327092	0.143305
f__Campylobacteraceae.g__Campylobacter_ASV05934	LUCAT1	0.17088	0.0329381	0.143402
f__Actinomycetaceae.g__Actinomyces_ASV08375	GATA6.AS1	-0.170993	0.0328204	0.143402
o__Clostridiales.f__Lachnospiraceae_ASV08984	ST3GAL4.AS1	-0.170845	0.0329744	0.143402
f__Enterococcaceae.g__Enterococcus_ASV13969	RP1.170O19.14	-0.170675	0.0331521	0.143822
o__Clostridiales.f__Ruminococcaceae_ASV13704	LINC01269	-0.17047	0.033367	0.1444
f__Ruminococcaceae.g__Ruminococcus_ASV08122	RP11.33O4.1	0.170162	0.0336911	0.144741
f__.Mogibacteriaceae..g__Mogibacterium_ASV08676	CCAT1	0.170223	0.0336265	0.144741
f__.Tissierellaceae..g__Parvimonas_ASV15121	RP11.20I20.4	-0.170193	0.0336588	0.144741
o__Clostridiales.f__Lachnospiraceae_ASV08865	ST3GAL4.AS1	-0.170035	0.0338269	0.144972
f__.Mogibacteriaceae..g__Mogibacterium_ASV08676	RP1.170O19.14	-0.169914	0.0339553	0.145171
f__.Tissierellaceae..g__Parvimonas_ASV15121	RP11.396O20.2	0.16983	0.0340453	0.145205
f__Ruminococcaceae.g__Ruminococcus_ASV08122	CTD.2555C10.3	-0.16963	0.0342598	0.145419
g__Roseburia.s__faecis_ASV15263	RP11.33O4.1	0.169685	0.0342	0.145419
f__Ruminococcaceae.g__Ruminococcus_ASV08122	CDKN2B.AS1	0.169363	0.0345472	0.146288
f__Lachnospiraceae.g__Coprococcus_ASV15003	MIR503HG	-0.169281	0.0346361	0.146315
f__Fusobacteriaceae.g__Fusobacterium_ASV15522	LINC01269	0.169159	0.0347689	0.146526
f__Ruminococcaceae.g__Ruminococcus_ASV07554	CTD.2555C10.3	-0.168926	0.0350231	0.147247
o__Clostridiales.f__Ruminococcaceae_ASV00145	RP1.261G23.7	-0.168729	0.0352398	0.147807
g__Roseburia.s__faecis_ASV15263	RP11.380P13.1	0.168581	0.0354032	0.148141
f__Lachnospiraceae.g__Dorea_ASV15355	LINC01269	-0.168388	0.0356168	0.148684
o__Clostridiales.f__Ruminococcaceae_ASV13892	CTB.61M7.2	-0.168199	0.0358267	0.148927
f__Fusobacteriaceae.g__Fusobacterium_ASV15520	AGAP2.AS1	0.168109	0.0359275	0.148927
f__Fusobacteriaceae.g__Fusobacterium_ASV15522	RP1.170O19.14	-0.16813	0.0359035	0.148927
g__Veillonella.s__dispar_ASV13143	RP11.20I20.4	0.167811	0.0362617	0.149662
g__Veillonella.s__parvula_ASV13157	RP11.242C19.2	0.1678	0.0362741	0.149662
f__Campylobacteraceae.g__Campylobacter_ASV05934	RP1.261G23.7	0.167626	0.0364717	0.150128
o__Coriobacteriales.f__Coriobacteriaceae_ASV10586	ZIM2.AS1	0.167495	0.0366196	0.150387
f__Enterococcaceae.g__Enterococcus_ASV13969	MIR4435.2HG	0.167415	0.0367107	0.150412
o__Clostridiales.f__Lachnospiraceae_ASV10079	RP11.20I20.4	-0.167211	0.0369437	0.150669
f__Lachnospiraceae.g__Anaerostipes_ASV15075	RP11.380P13.1	0.167266	0.0368809	0.150669
f__Actinomycetaceae.g__Actinomyces_ASV08325	LINC01269	0.167129	0.0370377	0.150705
o__Clostridiales.f__Ruminococcaceae_ASV00145	RP11.482G13.1	-0.166367	0.037922	0.150772
g__Alistipes.s__onderdonkii_ASV05119	RP11.211G3.2	-0.165803	0.0385875	0.150772
f__Desulfovibrionaceae.g__Bilophila_ASV05654	LINC01272	-0.16676	0.0374641	0.150772
f__Campylobacteraceae.g__Campylobacter_ASV05934	AGAP2.AS1	0.166142	0.0381857	0.150772
f__Actinomycetaceae.g__Actinomyces_ASV08375	RP11.211G3.2	0.165851	0.0385298	0.150772
f__.Mogibacteriaceae..g__Mogibacterium_ASV08676	SH3RF3.AS1	0.165862	0.0385172	0.150772
f__Lachnospiraceae.g__Blautia_ASV09594	RP1.170O19.14	0.165935	0.03843	0.150772
o__Clostridiales.f__Lachnospiraceae_ASV09977	RP1.170O19.14	0.166956	0.0372377	0.150772
f__Coriobacteriaceae.g__Adlercreutzia_ASV10588	CCAT1	-0.166546	0.0377123	0.150772
f__Coriobacteriaceae.g__Adlercreutzia_ASV10589	LUCAT1	-0.166473	0.0377982	0.150772
f__Bifidobacteriaceae.g__Bifidobacterium_ASV11471	CTB.61M7.2	-0.166146	0.0381807	0.150772
f__Clostridiaceae.g__Clostridium_ASV12376	GATA6.AS1	0.166739	0.0374884	0.150772
g__Veillonella.s__dispar_ASV13143	RP11.211G3.2	0.166086	0.0382516	0.150772
g__Veillonella.s__dispar_ASV13143	LINC01503	0.166131	0.0381985	0.150772
f__Veillonellaceae.g__Megasphaera_ASV13393	ZIM2.AS1	-0.166015	0.0383358	0.150772
f__Erysipelotrichaceae.g__Holdemania_ASV14231	MIR503HG	-0.167038	0.0371433	0.150772
c__Clostridia.o__Clostridiales_ASV15397	CCAT1	-0.166495	0.037772	0.150772
f__Fusobacteriaceae.g__Fusobacterium_ASV15522	RP1.261G23.7	0.166145	0.0381828	0.150772
f__Erysipelotrichaceae.g__Holdemania_ASV14231	AGAP2.AS1	-0.16567	0.0387451	0.150856
f__Lachnospiraceae.g__Coprococcus_ASV15003	RP11.396O20.2	0.165641	0.0387794	0.150856
g__Haemophilus.s__parainfluenzae_ASV06380	RP11.380P13.1	-0.165447	0.0390115	0.151087
f__Lachnospiraceae.g__Blautia_ASV09918	LINC01272	-0.165438	0.0390227	0.151087
f__Lachnospiraceae.g__Roseburia_ASV15174	RP1.170O19.14	0.165378	0.0390949	0.151087
f__Ruminococcaceae.g__Ruminococcus_ASV07554	MIR503HG	-0.164928	0.0396391	0.151652
o__Coriobacteriales.f__Coriobacteriaceae_ASV10586	GATA6.AS1	0.164903	0.0396693	0.151652
f__Coriobacteriaceae.g__Adlercreutzia_ASV10589	CTD.2555C10.3	-0.164976	0.0395799	0.151652
f__Ruminococcaceae.g__Oscillospira_ASV13659	CCAT1	-0.165142	0.0393792	0.151652
f__Lachnospiraceae.g__Coprococcus_ASV15011	WNT5A.AS1	-0.165051	0.0394891	0.151652
g__Clostridium.s__clostridioforme_ASV09123	RP1.170O19.14	0.164435	0.040242	0.15314
f__Lachnospiraceae.g__Coprococcus_ASV15003	ST3GAL4.AS1	-0.164358	0.0403363	0.15314
f__.Tissierellaceae..g__Parvimonas_ASV15121	GATA6.AS1	0.164303	0.0404046	0.15314
f__Fusobacteriaceae.g__Fusobacterium_ASV15522	ZIM2.AS1	-0.164304	0.040403	0.15314
g__Clostridium.s__clostridioforme_ASV09123	MIR503HG	-0.164158	0.0405845	0.153492
g__Veillonella.s__dispar_ASV13143	RP1.261G23.7	0.163993	0.0407886	0.153936
f__.Paraprevotellaceae..g__Paraprevotella_ASV02736	RP11.347C18.3	-0.163697	0.0411589	0.15442
f__Lachnospiraceae.g__Blautia_ASV09078	LUCAT1	-0.163638	0.0412325	0.15442
o__Clostridiales.f__Lachnospiraceae_ASV09753	CTD.2555C10.3	-0.163722	0.0411276	0.15442
f__Lachnospiraceae.g__Coprococcus_ASV10209	RP11.33O4.1	0.163542	0.041353	0.15442
f__.Tissierellaceae..g__Parvimonas_ASV15121	AGAP2.AS1	-0.163591	0.0412924	0.15442
f__Lachnospiraceae.g__Blautia_ASV09594	RP1.261G23.7	-0.163232	0.0417462	0.155233
f__Lachnospiraceae.g__Dorea_ASV15355	AGAP2.AS1	-0.163295	0.041666	0.155233
g__Roseburia.s__faecis_ASV15263	LINC01272	-0.163028	0.0420056	0.15587
o__Coriobacteriales.f__Coriobacteriaceae_ASV10586	B3GALT5.AS1	0.162951	0.0421034	0.155906
f__Campylobacteraceae.g__Campylobacter_ASV05934	GATA6.AS1	-0.162778	0.0423248	0.15595
g__Haemophilus.s__parainfluenzae_ASV06380	RP11.482G13.1	0.162621	0.0425277	0.15595
g__Haemophilus.s__parainfluenzae_ASV06380	RP1.261G23.7	0.162674	0.0424585	0.15595
g__Blautia.s__producta_ASV08960	LUCAT1	-0.162444	0.0427565	0.15595
o__Clostridiales.f__Lachnospiraceae_ASV09523	ST3GAL4.AS1	-0.162327	0.0429082	0.15595
g__Veillonella.s__dispar_ASV13143	RP11.380P13.1	-0.162849	0.0422343	0.15595
g__Veillonella.s__dispar_ASV13143	WNT5A.AS1	0.162426	0.0427794	0.15595
f__Veillonellaceae.g__Megasphaera_ASV13393	MIR503HG	0.162356	0.0428703	0.15595
o__Clostridiales.f__Ruminococcaceae_ASV13704	RP11.211G3.2	-0.16253	0.0426453	0.15595
f__Lachnospiraceae.g__Dorea_ASV15355	RP11.33O4.1	0.162085	0.043223	0.156772
g__Bacteroides.s__uniformis_ASV03984	RP11.347C18.3	-0.161709	0.0437174	0.157904
f__Campylobacteraceae.g__Campylobacter_ASV05934	CTB.61M7.2	0.161661	0.0437808	0.157904
o__Clostridiales.f__Lachnospiraceae_ASV14891	CDKN2B.AS1	0.161644	0.0438028	0.157904
g__Blautia.s__obeum_ASV09003	CCAT1	-0.16114	0.0444725	0.15929
o__Clostridiales.f__Lachnospiraceae_ASV09523	CTD.2555C10.3	-0.161085	0.0445471	0.15929
g__Veillonella.s__parvula_ASV13157	GK.AS1	0.161092	0.0445377	0.15929
f__Lachnospiraceae.g__Dorea_ASV15355	CDKN2B.AS1	0.161187	0.0444098	0.15929
o__Clostridiales.f__Ruminococcaceae_ASV07190	LUCAT1	-0.160746	0.0450032	0.160596
c__Clostridia.o__Clostridiales_ASV08574	ZIM2.AS1	0.159932	0.0461149	0.16149
f__.Mogibacteriaceae..g__Mogibacterium_ASV08676	MIR503HG	0.160373	0.0455102	0.16149
o__Clostridiales.f__.Mogibacteriaceae._ASV08690	CTD.2555C10.3	-0.160044	0.0459605	0.16149
o__Clostridiales.f__Lachnospiraceae_ASV08984	CDKN2B.AS1	0.160333	0.0455648	0.16149
f__Lachnospiraceae.g__Coprococcus_ASV10209	RP11.380P13.1	0.16001	0.0460071	0.16149
f__Coriobacteriaceae.g__Adlercreutzia_ASV10588	GATA6.AS1	0.160059	0.0459393	0.16149
f__Streptococcaceae.g__Streptococcus_ASV12252	SH3RF3.AS1	0.160194	0.0457547	0.16149
f__Enterococcaceae.g__Enterococcus_ASV13969	RP11.33O4.1	-0.159763	0.0463485	0.16149
o__Clostridiales.f__Lachnospiraceae_ASV14891	LINC01269	-0.160195	0.0457534	0.16149
f__.Tissierellaceae..g__Parvimonas_ASV15121	LINC01272	-0.160307	0.0455995	0.16149
f__.Tissierellaceae..g__Parvimonas_ASV15121	MIR3945HG	-0.159887	0.0461768	0.16149
f__Fusobacteriaceae.g__Fusobacterium_ASV15522	CCAT1	0.159794	0.0463051	0.16149
f__Streptococcaceae.g__Streptococcus_ASV12252	MIR4435.2HG	0.159426	0.0468176	0.161958
o__Clostridiales.f__Ruminococcaceae_ASV13892	RP11.482G13.1	-0.159432	0.0468082	0.161958
g__Roseburia.s__faecis_ASV15263	MIR4435.2HG	-0.159453	0.0467797	0.161958
f__Lachnospiraceae.g__Dorea_ASV15355	MIR503HG	-0.159403	0.0468489	0.161958
g__Clostridium.s__clostridioforme_ASV09123	CCAT1	-0.159076	0.0473086	0.162911
f__Lachnospiraceae.g__Coprococcus_ASV15011	MIR503HG	-0.159111	0.0472591	0.162911
f__Ruminococcaceae.g__Oscillospira_ASV13741	RP11.20I20.4	-0.158893	0.0475672	0.163167
f__Lachnospiraceae.g__Roseburia_ASV15174	RP11.33O4.1	0.158921	0.0475277	0.163167
f__Lachnospiraceae.g__Blautia_ASV09918	WNT5A.AS1	-0.158674	0.0478783	0.163916
g__Faecalibacterium.s__prausnitzii_ASV00156	RP1.170O19.14	0.158417	0.048245	0.164077
o__Clostridiales.f__Lachnospiraceae_ASV09523	LINC01272	-0.15841	0.0482547	0.164077
o__Clostridiales.f__Lachnospiraceae_ASV09977	CTB.61M7.2	-0.158381	0.0482962	0.164077
f__Ruminococcaceae.g__Oscillospira_ASV13741	B3GALT5.AS1	0.158535	0.0480754	0.164077
f__Fusobacteriaceae.g__Fusobacterium_ASV15520	RP1.261G23.7	0.158182	0.0485823	0.164733
f__Bifidobacteriaceae.g__Bifidobacterium_ASV11471	SH3RF3.AS1	-0.157907	0.0489796	0.165446
f__Lachnospiraceae.g__Coprococcus_ASV15003	B3GALT5.AS1	0.157913	0.048972	0.165446
f__Lachnospiraceae.g__Blautia_ASV09594	MIR503HG	-0.157622	0.0493953	0.166533
f__.Mogibacteriaceae..g__Mogibacterium_ASV08676	WNT5A.AS1	0.157537	0.0495193	0.166633
c__Clostridia.o__Clostridiales_ASV08574	LINC01272	-0.157421	0.0496894	0.166818
f__Erysipelotrichaceae.g__Holdemania_ASV14231	CTD.2555C10.3	-0.157371	0.0497626	0.166818
o__Clostridiales.f__Lachnospiraceae_ASV09113	CTD.2555C10.3	-0.157256	0.0499313	0.167067
g__Faecalibacterium.s__prausnitzii_ASV00156	LINC01272	-0.157147	0.0500931	0.167292
o__Clostridiales.f__Lachnospiraceae_ASV09113	GK.AS1	-0.156998	0.0503133	0.167711
o__Clostridiales.f__.Mogibacteriaceae._ASV08647	RP11.20I20.4	-0.156538	0.0510002	0.168135
f__Lachnospiraceae.g__Blautia_ASV09078	GATA6.AS1	0.156649	0.0508336	0.168135
f__Lachnospiraceae.g__Blautia_ASV09078	CDKN2B.AS1	0.156531	0.0510105	0.168135
f__Lachnospiraceae.g__Coprococcus_ASV15003	CDKN2B.AS1	0.156761	0.0506667	0.168135
f__Lachnospiraceae.g__Roseburia_ASV15174	RP11.20I20.4	-0.156654	0.0508256	0.168135
f__Lachnospiraceae.g__Dorea_ASV15355	MIR4435.2HG	-0.156547	0.0509866	0.168135
f__Ruminococcaceae.g__Oscillospira_ASV13741	MIR4435.2HG	-0.156335	0.0513045	0.16879
f__Ruminococcaceae.g__Oscillospira_ASV13659	B3GALT5.AS1	0.156178	0.0515426	0.169259
f__Ruminococcaceae.g__Ruminococcus_ASV07554	CTB.61M7.2	-0.155997	0.0518173	0.169846
f__.Mogibacteriaceae..g__Mogibacterium_ASV08676	MIR3945HG	0.155795	0.0521247	0.170537
f__Lachnospiraceae.g__Blautia_ASV09078	GK.AS1	-0.155583	0.0524486	0.171088
g__Veillonella.s__parvula_ASV13157	CTD.2555C10.3	0.155559	0.0524864	0.171088
g__Haemophilus.s__parainfluenzae_ASV06380	ST3GAL4.AS1	0.155359	0.0527936	0.171548
f__.Mogibacteriaceae..g__Mogibacterium_ASV08676	RP11.347C18.3	0.155341	0.0528213	0.171548
f__Lachnospiraceae.g__Blautia_ASV09918	CCAT1	-0.155097	0.0531996	0.17246
f__Ruminococcaceae.g__Oscillospira_ASV12634	LINC01272	-0.154904	0.0534995	0.172575
f__Lachnospiraceae.g__Coprococcus_ASV15011	RP1.261G23.7	-0.154933	0.0534545	0.172575
f__Lachnospiraceae.g__Dorea_ASV15355	RP11.347C18.3	-0.154886	0.0535275	0.172575
f__Ruminococcaceae.g__Ruminococcus_ASV08122	GATA6.AS1	0.15438	0.0543237	0.172601
f__.Mogibacteriaceae..g__Mogibacterium_ASV08676	RP1.261G23.7	0.154633	0.053924	0.172601
f__Bifidobacteriaceae.g__Bifidobacterium_ASV11471	CTD.2555C10.3	-0.154529	0.0540885	0.172601
f__Bifidobacteriaceae.g__Bifidobacterium_ASV11471	MIR503HG	-0.154323	0.0544132	0.172601
f__Veillonellaceae.g__Megasphaera_ASV13393	MIR3945HG	0.154618	0.0539484	0.172601
f__Enterococcaceae.g__Enterococcus_ASV13969	LINC01272	0.154467	0.0541864	0.172601
o__Clostridiales.f__Lachnospiraceae_ASV14891	RP11.33O4.1	0.15442	0.0542608	0.172601
f__Lachnospiraceae.g__Coprococcus_ASV15003	LINC01503	-0.15467	0.0538664	0.172601
f__Lachnospiraceae.g__Dorea_ASV15355	RP11.396O20.2	0.154512	0.0541151	0.172601
f__Erysipelotrichaceae.g__Holdemania_ASV14231	RP11.20I20.4	-0.154008	0.0549139	0.173878
o__Clostridiales.f__Lachnospiraceae_ASV09113	RP1.261G23.7	-0.153822	0.0552104	0.173967
f__Streptococcaceae.g__Streptococcus_ASV12252	GATA6.AS1	-0.153841	0.0551813	0.173967
g__Veillonella.s__dispar_ASV13143	RP11.396O20.2	-0.153806	0.0552368	0.173967
f__Ruminococcaceae.g__Ruminococcus_ASV07554	MIR4435.2HG	-0.153478	0.0557648	0.175318
f__Ruminococcaceae.g__Ruminococcus_ASV07554	RP11.20I20.4	-0.153301	0.0560517	0.175907
o__Clostridiales.f__Ruminococcaceae_ASV00145	SH3RF3.AS1	-0.15309	0.0563942	0.17601
f__Lachnospiraceae.g__Blautia_ASV09078	RP11.211G3.2	-0.153177	0.0562531	0.17601
f__Lachnospiraceae.g__Blautia_ASV09918	MIR3945HG	-0.153064	0.0564371	0.17601
f__Streptococcaceae.g__Streptococcus_ASV12252	RP1.261G23.7	0.153036	0.0564822	0.17601
o__Clostridiales.f__.Mogibacteriaceae._ASV08647	LINC01272	-0.152848	0.0567905	0.17657
o__Clostridiales.f__Lachnospiraceae_ASV09753	CCAT1	-0.152799	0.0568706	0.17657
f__.Tissierellaceae..g__Parvimonas_ASV15121	CCAT1	-0.152743	0.0569613	0.17657
g__Veillonella.s__dispar_ASV13143	CTB.31N19.3	0.152442	0.0574588	0.177801
o__Clostridiales.f__Lachnospiraceae_ASV09753	RP11.33O4.1	0.152305	0.0576863	0.17807
f__Lachnospiraceae.g__Roseburia_ASV15174	CTB.31N19.3	-0.152268	0.0577471	0.17807
f__Lachnospiraceae.g__Blautia_ASV09594	B3GALT5.AS1	0.152002	0.0581904	0.179125
g__Veillonella.s__parvula_ASV13157	LUCAT1	0.151604	0.0588601	0.180872
o__Clostridiales.f__Ruminococcaceae_ASV07190	CCAT1	-0.151542	0.0589641	0.180878
o__Clostridiales.f__Lachnospiraceae_ASV14891	LUCAT1	-0.151215	0.0595197	0.181951
f__Lachnospiraceae.g__Dorea_ASV15355	B3GALT5.AS1	0.151253	0.0594557	0.181951
c__Clostridia.o__Clostridiales_ASV08574	GATA6.AS1	0.15078	0.0602655	0.182554
o__Clostridiales.f__Lachnospiraceae_ASV09113	GATA6.AS1	0.150748	0.0603196	0.182554
o__Clostridiales.f__Lachnospiraceae_ASV09977	MIR3945HG	-0.150942	0.0599865	0.182554
f__Clostridiaceae.g__Clostridium_ASV12376	MIR503HG	-0.150739	0.0603358	0.182554
o__Clostridiales.f__Ruminococcaceae_ASV13892	RP11.20I20.4	-0.150805	0.0602224	0.182554
g__Roseburia.s__faecis_ASV15263	RP11.20I20.4	-0.150847	0.0601501	0.182554
o__Clostridiales.f__Lachnospiraceae_ASV09753	AGAP2.AS1	-0.150637	0.0605115	0.182774
f__Erysipelotrichaceae.g__Holdemania_ASV14231	ZIM2.AS1	0.150404	0.0609153	0.18368
g__Clostridium.s__clostridioforme_ASV09123	AGAP2.AS1	-0.150213	0.0612482	0.18437
g__Clostridium.s__clostridioforme_ASV09123	WNT5A.AS1	-0.149802	0.0619687	0.185592
f__Clostridiaceae.g__Clostridium_ASV12376	MIR4435.2HG	-0.149812	0.0619509	0.185592
f__Ruminococcaceae.g__Oscillospira_ASV13659	RP11.20I20.4	-0.149881	0.061829	0.185592
o__Clostridiales.f__Lachnospiraceae_ASV08984	CTD.2555C10.3	-0.149652	0.0622321	0.186066
g__Blautia.s__obeum_ASV09003	CTD.2555C10.3	-0.149317	0.0628274	0.186585
o__Clostridiales.f__Lachnospiraceae_ASV09113	MIR4435.2HG	-0.149482	0.0625329	0.186585
f__Lachnospiraceae.g__Blautia_ASV09918	CTB.61M7.2	-0.149348	0.0627723	0.186585
f__Lachnospiraceae.g__Coprococcus_ASV15011	RP11.20I20.4	-0.149429	0.0626275	0.186585
f__Campylobacteraceae.g__Campylobacter_ASV05934	RP11.211G3.2	0.149127	0.0631658	0.186675
g__Haemophilus.s__parainfluenzae_ASV06380	CTB.31N19.3	0.149081	0.0632489	0.186675
g__Blautia.s__producta_ASV08960	CCAT1	-0.149021	0.0633568	0.186675
f__Lachnospiraceae.g__Blautia_ASV09078	LINC01272	-0.148996	0.0634014	0.186675
o__Clostridiales.f__Lachnospiraceae_ASV09523	CCAT1	-0.149013	0.0633709	0.186675
o__Clostridiales.f__Lachnospiraceae_ASV10079	RP11.211G3.2	-0.148946	0.0634905	0.186675
g__Faecalibacterium.s__prausnitzii_ASV00156	CTB.61M7.2	-0.148601	0.0641136	0.187234
f__Ruminococcaceae.g__Ruminococcus_ASV07554	SH3RF3.AS1	-0.148373	0.0645271	0.187234
o__Clostridiales.f__Lachnospiraceae_ASV08865	LINC01503	-0.148684	0.0639637	0.187234
o__Clostridiales.f__Lachnospiraceae_ASV08984	B3GALT5.AS1	0.14862	0.064079	0.187234
o__Coriobacteriales.f__Coriobacteriaceae_ASV10586	LINC01503	-0.148584	0.0641448	0.187234
f__Coriobacteriaceae.g__Adlercreutzia_ASV10589	MIR3945HG	-0.148486	0.0643216	0.187234
f__Bifidobacteriaceae.g__Bifidobacterium_ASV11471	RP11.211G3.2	-0.148393	0.0644901	0.187234
g__Veillonella.s__dispar_ASV13143	RP11.33O4.1	-0.148491	0.064312	0.187234
o__Clostridiales.f__Lachnospiraceae_ASV09113	CDKN2B.AS1	0.148253	0.0647466	0.187564
f__Lachnospiraceae.g__Anaerostipes_ASV15075	GATA6.AS1	0.148137	0.0649581	0.187869
f__Lachnospiraceae.g__Blautia_ASV09918	SH3RF3.AS1	-0.147899	0.0653943	0.188822
f__Ruminococcaceae.g__Ruminococcus_ASV08122	RP11.347C18.3	-0.147767	0.0656381	0.18891
f__.Mogibacteriaceae..g__Mogibacterium_ASV08676	CTD.2555C10.3	0.147796	0.0655843	0.18891
f__Coriobacteriaceae.g__Adlercreutzia_ASV10588	RP11.380P13.1	0.147539	0.0660599	0.189233
o__Clostridiales.f__Lachnospiraceae_ASV14891	B3GALT5.AS1	0.147533	0.066071	0.189233
f__Fusobacteriaceae.g__Fusobacterium_ASV15522	CTD.2555C10.3	0.147564	0.0660149	0.189233
g__Roseburia.s__faecis_ASV15263	RP1.261G23.7	-0.147352	0.0664088	0.189586
f__Fusobacteriaceae.g__Fusobacterium_ASV15522	LINC01503	0.147387	0.0663433	0.189586
f__Campylobacteraceae.g__Campylobacter_ASV05934	WNT5A.AS1	0.147294	0.066517	0.189589
o__Clostridiales.f__Lachnospiraceae_ASV09170	AGAP2.AS1	-0.147233	0.0666305	0.189608
c__Clostridia.o__Clostridiales_ASV08574	RP11.380P13.1	0.147135	0.0668143	0.189826
o__Clostridiales.f__.Mogibacteriaceae._ASV08647	GATA6.AS1	0.147056	0.0669628	0.189943
o__Clostridiales.f__Ruminococcaceae_ASV00145	RP11.211G3.2	-0.146992	0.0670818	0.189976
o__Clostridiales.f__Lachnospiraceae_ASV09523	CTB.31N19.3	-0.146885	0.0672835	0.190124
f__Veillonellaceae.g__Megasphaera_ASV13393	GATA6.AS1	-0.14685	0.0673489	0.190124
g__Faecalibacterium.s__prausnitzii_ASV00156	GATA6.AS1	0.1466	0.0678224	0.191156
o__Coriobacteriales.f__Coriobacteriaceae_ASV10586	RP1.170O19.14	0.146081	0.0688126	0.193638
o__Clostridiales.f__Ruminococcaceae_ASV00145	ST3GAL4.AS1	-0.145977	0.0690117	0.19389
f__Campylobacteraceae.g__Campylobacter_ASV05934	LINC01272	0.145844	0.0692676	0.194301
f__Lachnospiraceae.g__Blautia_ASV09078	CTB.61M7.2	-0.1457	0.0695454	0.194771
o__Clostridiales.f__Ruminococcaceae_ASV00145	MIR4435.2HG	-0.145635	0.0696725	0.194819
f__Enterococcaceae.g__Enterococcus_ASV13969	RP11.20I20.4	0.145538	0.0698606	0.195037
o__Clostridiales.f__Lachnospiraceae_ASV08984	RP11.380P13.1	0.145438	0.0700559	0.195107
f__Lachnospiraceae.g__Coprococcus_ASV15003	CTB.31N19.3	-0.145412	0.0701061	0.195107
c__Clostridia.o__Clostridiales_ASV08574	LINC01269	-0.145241	0.070439	0.195725
g__Clostridium.s__clostridioforme_ASV09123	RP11.211G3.2	-0.144714	0.0714768	0.198298
g__Clostridium.s__clostridioforme_ASV09123	RP11.242C19.2	-0.14442	0.072059	0.1996
f__Ruminococcaceae.g__Oscillospira_ASV13659	MIR503HG	-0.144128	0.0726431	0.200904
f__Campylobacteraceae.g__Campylobacter_ASV05934	RP11.482G13.1	0.143713	0.0734791	0.20164
g__Blautia.s__obeum_ASV09003	AGAP2.AS1	-0.143791	0.0733213	0.20164
o__Coriobacteriales.f__Coriobacteriaceae_ASV10586	MIR4435.2HG	-0.143762	0.0733809	0.20164
g__Veillonella.s__parvula_ASV13157	RP1.170O19.14	-0.143924	0.0730535	0.20164
f__Lachnospiraceae.g__Dorea_ASV15355	GATA6.AS1	0.143724	0.0734575	0.20164
c__Clostridia.o__Clostridiales_ASV08574	CDKN2B.AS1	0.143638	0.0736322	0.201748
f__Lachnospiraceae.g__Dorea_ASV15355	ST3GAL4.AS1	-0.142828	0.0752888	0.205968
o__Clostridiales.f__.Mogibacteriaceae._ASV08690	LINC01503	-0.142465	0.076041	0.206922
o__Clostridiales.f__Lachnospiraceae_ASV08865	RP11.211G3.2	-0.142455	0.0760615	0.206922
o__Clostridiales.f__Lachnospiraceae_ASV09977	ST3GAL4.AS1	-0.142378	0.0762223	0.206922
f__Ruminococcaceae.g__Oscillospira_ASV13741	LUCAT1	-0.142558	0.075848	0.206922
f__Fusobacteriaceae.g__Fusobacterium_ASV15520	RP11.482G13.1	0.142392	0.0761918	0.206922
f__Ruminococcaceae.g__Ruminococcus_ASV08122	CTB.31N19.3	-0.142295	0.076395	0.207074
g__Bacteroides.s__uniformis_ASV03984	RP11.211G3.2	-0.141841	0.0773473	0.207352
g__Bacteroides.s__uniformis_ASV03984	ZIM2.AS1	0.141779	0.0774795	0.207352
g__Alistipes.s__onderdonkii_ASV05119	CTD.2555C10.3	-0.142074	0.0768577	0.207352
g__Haemophilus.s__parainfluenzae_ASV06380	AGAP2.AS1	0.141642	0.0777678	0.207352
f__Ruminococcaceae.g__Ruminococcus_ASV08122	RP11.396O20.2	0.142055	0.0768971	0.207352
o__Clostridiales.f__.Mogibacteriaceae._ASV08647	CTB.61M7.2	-0.141634	0.0777863	0.207352
f__Lachnospiraceae.g__Blautia_ASV09594	LINC01272	-0.141977	0.0770611	0.207352
f__Coriobacteriaceae.g__Adlercreutzia_ASV10589	MIR503HG	-0.14166	0.0777313	0.207352
f__Veillonellaceae.g__Megasphaera_ASV13393	RP1.261G23.7	0.141933	0.077153	0.207352
f__Lachnospiraceae.g__Coprococcus_ASV15011	RP11.33O4.1	0.141881	0.0772634	0.207352
f__Lachnospiraceae.g__Roseburia_ASV15174	CTB.61M7.2	-0.141634	0.0777843	0.207352
o__Clostridiales.f__Ruminococcaceae_ASV00145	WNT5A.AS1	-0.141308	0.0784797	0.207739
g__Faecalibacterium.s__prausnitzii_ASV00156	LINC01269	-0.140961	0.0792224	0.207739
f__Desulfovibrionaceae.g__Bilophila_ASV05654	LINC01269	-0.141059	0.0790125	0.207739
f__Campylobacteraceae.g__Campylobacter_ASV05934	B3GALT5.AS1	-0.141028	0.0790775	0.207739
f__Ruminococcaceae.g__Ruminococcus_ASV07554	GATA6.AS1	0.141077	0.078974	0.207739
c__Clostridia.o__Clostridiales_ASV08574	AGAP2.AS1	-0.141103	0.0789171	0.207739
o__Clostridiales.f__.Mogibacteriaceae._ASV08647	GK.AS1	-0.141049	0.0790331	0.207739
o__Clostridiales.f__Lachnospiraceae_ASV08984	ZIM2.AS1	0.140985	0.0791701	0.207739
o__Clostridiales.f__Lachnospiraceae_ASV08984	LINC01503	-0.141308	0.0784795	0.207739
f__.Tissierellaceae..g__Parvimonas_ASV15121	CDKN2B.AS1	0.141184	0.0787435	0.207739
f__Fusobacteriaceae.g__Fusobacterium_ASV15522	GK.AS1	0.141358	0.0783711	0.207739
f__.Tissierellaceae..g__Parvimonas_ASV15121	ST3GAL4.AS1	-0.140892	0.0793705	0.207819
f__Lachnospiraceae.g__Coprococcus_ASV15003	RP11.20I20.4	-0.140561	0.080086	0.209383
f__Lachnospiraceae.g__Roseburia_ASV15174	GATA6.AS1	0.140475	0.080272	0.20956
f__Lachnospiraceae.g__Blautia_ASV09594	RP11.33O4.1	0.14042	0.0803932	0.209567
o__Clostridiales.f__Lachnospiraceae_ASV08865	ZIM2.AS1	0.14027	0.0807192	0.209875
f__Ruminococcaceae.g__Oscillospira_ASV12634	RP11.211G3.2	-0.140202	0.0808673	0.209875
f__Lachnospiraceae.g__Anaerostipes_ASV15075	LINC01272	-0.140208	0.0808559	0.209875
f__Desulfovibrionaceae.g__Bilophila_ASV05654	RP11.396O20.2	-0.140063	0.0811714	0.210264
f__Ruminococcaceae.g__Oscillospira_ASV12634	CTB.61M7.2	-0.140026	0.0812546	0.210264
o__Clostridiales.f__.Mogibacteriaceae._ASV08647	RP11.482G13.1	-0.139505	0.0824043	0.212867
o__Clostridiales.f__Lachnospiraceae_ASV09113	ZIM2.AS1	0.139416	0.0826018	0.212867
g__Veillonella.s__dispar_ASV13143	ST3GAL4.AS1	0.139407	0.0826213	0.212867
f__Lachnospiraceae.g__Roseburia_ASV15174	MIR4435.2HG	-0.139295	0.08287	0.213198
o__Clostridiales.f__Lachnospiraceae_ASV14891	RP11.211G3.2	-0.139145	0.0832065	0.213753
o__Clostridiales.f__.Mogibacteriaceae._ASV08647	CTB.31N19.3	-0.13902	0.0834864	0.213851
f__Fusobacteriaceae.g__Fusobacterium_ASV15520	B3GALT5.AS1	-0.139072	0.0833697	0.213851
o__Clostridiales.f__Lachnospiraceae_ASV10079	RP11.380P13.1	0.138661	0.0842945	0.215609
g__Haemophilus.s__parainfluenzae_ASV06380	RP11.20I20.4	0.138323	0.0850612	0.217256
f__Ruminococcaceae.g__Ruminococcus_ASV08122	WNT5A.AS1	-0.138176	0.0853961	0.217295
o__Clostridiales.f__.Mogibacteriaceae._ASV08647	RP11.33O4.1	0.138258	0.0852098	0.217295
f__Ruminococcaceae.g__Oscillospira_ASV12634	CTB.31N19.3	-0.138155	0.0854448	0.217295
f__Lachnospiraceae.g__Blautia_ASV09594	CTD.2555C10.3	-0.137655	0.0865932	0.219899
f__Lachnospiraceae.g__Anaerostipes_ASV15075	RP11.396O20.2	0.137601	0.086718	0.219901
o__Clostridiales.f__Lachnospiraceae_ASV09753	CTB.61M7.2	-0.137346	0.0873079	0.220165
g__Roseburia.s__faecis_ASV15263	GATA6.AS1	0.137477	0.0870044	0.220165
g__Roseburia.s__faecis_ASV15263	CTB.31N19.3	-0.137378	0.0872343	0.220165
f__Fusobacteriaceae.g__Fusobacterium_ASV15522	WNT5A.AS1	0.137341	0.0873198	0.220165
g__Bacteroides.s__uniformis_ASV03984	GK.AS1	-0.137156	0.0877522	0.220941
f__Enterococcaceae.g__Enterococcus_ASV13969	B3GALT5.AS1	-0.136843	0.0884852	0.222337
o__Clostridiales.f__Lachnospiraceae_ASV14891	RP11.20I20.4	-0.13677	0.0886573	0.222337
g__Roseburia.s__faecis_ASV15263	RP11.347C18.3	-0.136758	0.0886837	0.222337
f__Desulfovibrionaceae.g__Bilophila_ASV05654	SH3RF3.AS1	-0.136489	0.0893201	0.223616
f__Lachnospiraceae.g__Roseburia_ASV15174	LINC01272	-0.136306	0.0897548	0.224387
o__Clostridiales.f__Lachnospiraceae_ASV14891	RP11.380P13.1	0.13619	0.0900306	0.224759
f__Lachnospiraceae.g__Blautia_ASV09918	GK.AS1	-0.135889	0.0907504	0.224969
g__Veillonella.s__parvula_ASV13157	LINC01269	0.136091	0.0902667	0.224969
f__Enterococcaceae.g__Enterococcus_ASV13969	GK.AS1	0.135934	0.0906416	0.224969
f__Enterococcaceae.g__Enterococcus_ASV13969	RP11.242C19.2	0.1359	0.0907235	0.224969
f__Fusobacteriaceae.g__Fusobacterium_ASV15522	LUCAT1	0.13596	0.0905802	0.224969
g__Veillonella.s__dispar_ASV13143	CCAT1	0.135724	0.0911451	0.225317
f__Enterococcaceae.g__Enterococcus_ASV13969	WNT5A.AS1	0.135752	0.0910792	0.225317
g__Blautia.s__producta_ASV08960	CTB.61M7.2	-0.135463	0.0917748	0.226242
f__Lachnospiraceae.g__Roseburia_ASV15174	B3GALT5.AS1	0.135474	0.0917482	0.226242
o__Clostridiales.f__Lachnospiraceae_ASV08865	RP1.261G23.7	-0.135293	0.0921864	0.226625
f__Clostridiaceae.g__Clostridium_ASV12376	RP11.211G3.2	-0.135337	0.0920804	0.226625
o__Clostridiales.f__Lachnospiraceae_ASV08865	CTB.61M7.2	-0.135123	0.0926012	0.2267
f__Enterococcaceae.g__Enterococcus_ASV13969	CDKN2B.AS1	-0.135153	0.092527	0.2267
f__Lachnospiraceae.g__Roseburia_ASV15174	MIR503HG	-0.135213	0.0923825	0.2267
f__Coriobacteriaceae.g__Adlercreutzia_ASV10589	RP11.211G3.2	-0.134997	0.0929088	0.227139
g__Haemophilus.s__parainfluenzae_ASV06380	ZIM2.AS1	-0.134864	0.0932326	0.227313
f__Lachnospiraceae.g__Coprococcus_ASV10209	CCAT1	-0.134863	0.0932368	0.227313
f__Veillonellaceae.g__Megasphaera_ASV13393	WNT5A.AS1	0.134639	0.0937858	0.228337
f__Desulfovibrionaceae.g__Bilophila_ASV05654	RP11.211G3.2	-0.134384	0.0944163	0.229556
g__Bacteroides.s__uniformis_ASV03984	LUCAT1	-0.134294	0.094638	0.22978
f__Lachnospiraceae.g__Coprococcus_ASV15011	CDKN2B.AS1	0.134159	0.0949744	0.23028
o__Clostridiales.f__Lachnospiraceae_ASV09753	RP1.261G23.7	-0.133987	0.0954012	0.230729
f__Lachnospiraceae.g__Coprococcus_ASV15011	SH3RF3.AS1	-0.133928	0.0955503	0.230729
f__Fusobacteriaceae.g__Fusobacterium_ASV15520	GK.AS1	0.133953	0.095488	0.230729
f__Actinomycetaceae.g__Actinomyces_ASV08375	MIR3945HG	0.133608	0.0963517	0.232347
f__Veillonellaceae.g__Megasphaera_ASV13393	RP11.482G13.1	0.133486	0.0966576	0.232767
o__Clostridiales.f__.Mogibacteriaceae._ASV08647	ZIM2.AS1	0.133338	0.0970332	0.233354
o__Coriobacteriales.f__Coriobacteriaceae_ASV10586	CDKN2B.AS1	0.133285	0.097166	0.233357
f__Ruminococcaceae.g__Oscillospira_ASV13741	CDKN2B.AS1	0.133225	0.0973189	0.233407
g__Haemophilus.s__parainfluenzae_ASV06380	SH3RF3.AS1	0.133006	0.0978755	0.233676
o__Clostridiales.f__Ruminococcaceae_ASV07190	MIR4435.2HG	-0.132777	0.0984582	0.233676
f__Lachnospiraceae.g__Blautia_ASV09918	RP11.211G3.2	-0.132742	0.0985483	0.233676
f__Coriobacteriaceae.g__Adlercreutzia_ASV10588	RP1.170O19.14	0.13274	0.0985538	0.233676
f__Ruminococcaceae.g__Oscillospira_ASV13659	LINC01272	-0.132714	0.0986193	0.233676
f__Ruminococcaceae.g__Oscillospira_ASV13741	GATA6.AS1	0.132737	0.0985612	0.233676
f__Enterococcaceae.g__Enterococcus_ASV13969	SH3RF3.AS1	0.132757	0.0985092	0.233676
o__Clostridiales.f__Lachnospiraceae_ASV14891	RP1.261G23.7	-0.133127	0.0975665	0.233676
f__Lachnospiraceae.g__Coprococcus_ASV15011	ST3GAL4.AS1	-0.133018	0.0978444	0.233676
g__Veillonella.s__dispar_ASV13143	B3GALT5.AS1	-0.132661	0.098757	0.23369
g__Bacteroides.s__uniformis_ASV03984	LINC01269	-0.132493	0.099188	0.233828
f__Fusobacteriaceae.g__Fusobacterium_ASV15520	CTB.61M7.2	0.132484	0.0992117	0.233828
f__Fusobacteriaceae.g__Fusobacterium_ASV15520	RP11.33O4.1	-0.132542	0.0990617	0.233828
f__Ruminococcaceae.g__Oscillospira_ASV13741	MIR503HG	-0.132182	0.0999894	0.235347
f__Lachnospiraceae.g__Coprococcus_ASV15011	RP11.211G3.2	-0.132041	0.100357	0.235899
c__Clostridia.o__Clostridiales_ASV08574	RP11.396O20.2	0.131943	0.100611	0.236182
o__Clostridiales.f__Lachnospiraceae_ASV09113	RP11.482G13.1	-0.131802	0.100978	0.236417
f__Streptococcaceae.g__Streptococcus_ASV12252	AGAP2.AS1	0.131848	0.100857	0.236417
f__Clostridiaceae.g__Clostridium_ASV12376	AGAP2.AS1	-0.131703	0.101238	0.236711
f__Lachnospiraceae.g__Anaerostipes_ASV15075	LUCAT1	-0.131591	0.10153	0.236961
f__Fusobacteriaceae.g__Fusobacterium_ASV15520	ZIM2.AS1	-0.13156	0.101612	0.236961
f__Lachnospiraceae.g__Anaerostipes_ASV15075	RP11.211G3.2	-0.131439	0.101929	0.237388
f__Ruminococcaceae.g__Ruminococcus_ASV08122	LINC01269	-0.131111	0.102795	0.238151
f__Actinomycetaceae.g__Actinomyces_ASV08375	RP11.242C19.2	0.131213	0.102525	0.238151
f__Lachnospiraceae.g__Blautia_ASV09918	RP11.482G13.1	-0.131139	0.102721	0.238151
f__Coriobacteriaceae.g__Adlercreutzia_ASV10589	ST3GAL4.AS1	-0.131188	0.102591	0.238151
o__Clostridiales.f__Lachnospiraceae_ASV09523	LINC01269	-0.13099	0.103116	0.238581
f__Ruminococcaceae.g__Oscillospira_ASV12634	ST3GAL4.AS1	-0.130842	0.103508	0.239176
g__Roseburia.s__faecis_ASV15263	WNT5A.AS1	-0.130561	0.104258	0.240596
f__Lachnospiraceae.g__Dorea_ASV15355	MIR3945HG	-0.13031	0.104931	0.241833
g__Faecalibacterium.s__prausnitzii_ASV00156	RP11.347C18.3	-0.129891	0.106062	0.244122
g__Alistipes.s__onderdonkii_ASV05119	ST3GAL4.AS1	-0.129754	0.106435	0.244661
f__Lachnospiraceae.g__Coprococcus_ASV15011	CTB.31N19.3	-0.129688	0.106615	0.244758
f__Desulfovibrionaceae.g__Bilophila_ASV05654	CTB.61M7.2	-0.12957	0.106938	0.244796
f__Bifidobacteriaceae.g__Bifidobacterium_ASV11471	RP11.347C18.3	-0.12953	0.107046	0.244796
f__Ruminococcaceae.g__Oscillospira_ASV13659	LINC01269	-0.129605	0.106841	0.244796
g__Veillonella.s__parvula_ASV13157	LINC01503	0.129392	0.107424	0.245344
o__Clostridiales.f__Ruminococcaceae_ASV00145	RP1.170O19.14	0.129298	0.107681	0.245612
f__Ruminococcaceae.g__Oscillospira_ASV13741	CTD.2555C10.3	-0.129119	0.108175	0.246421
f__Lachnospiraceae.g__Coprococcus_ASV15011	LINC01269	-0.129045	0.108377	0.246564
o__Clostridiales.f__Lachnospiraceae_ASV10079	LINC01272	-0.128924	0.10871	0.247005
f__Campylobacteraceae.g__Campylobacter_ASV05934	SH3RF3.AS1	0.128806	0.109039	0.247119
f__Lachnospiraceae.g__Dorea_ASV15355	LUCAT1	-0.128845	0.108931	0.247119
g__Veillonella.s__dispar_ASV13143	CDKN2B.AS1	-0.128472	0.109969	0.248906

## Sheet: pc_ASVs_associations
X_features_taxa	Y_features_protein_coding_gene	association	p-values	q-values	include
f__Ruminococcaceae_ASV00145	MCEMP1	-0.324408	3.60305e-05	0.0154414	included in Figure
f__Ruminococcaceae_ASV00145	S100A12	-0.327722	2.96356e-05	0.0154414	included in Figure
f__Ruminococcaceae_ASV00145	LILRA6	-0.316149	5.80592e-05	0.0154414	included in Figure
s__uniformis_ASV03984	S100A12	-0.314675	6.31282e-05	0.0154414	included in Figure
g__Blautia_ASV09918	PCK1	0.312898	6.97919e-05	0.0154414	included in Figure
g__Streptococcus_ASV12252	MCEMP1	0.319858	4.69418e-05	0.0154414	included in Figure
g__Streptococcus_ASV12252	BNIP3	0.344958	1.03368e-05	0.0154414	included in Figure
g__Megasphaera_ASV13393	C6orf223	0.32099	4.39692e-05	0.0154414	included in Figure
f__Ruminococcaceae_ASV00145	FCGR2A	-0.306346	0.000100483	0.0168826	included in Figure
g__Mogibacterium_ASV08676	HK3	0.298639	0.000152611	0.0168826	included in Figure
g__Blautia_ASV09078	BNIP3	-0.303013	0.000120559	0.0168826	included in Figure
g__Megasphaera_ASV13393	S100A12	0.30493	0.000108595	0.0168826	included in Figure
g__Megasphaera_ASV13393	BNIP3	0.299908	0.000142572	0.0168826	included in Figure
g__Megasphaera_ASV13393	ACSL1	0.301144	0.000133396	0.0168826	included in Figure
f__Ruminococcaceae_ASV13892	C6orf223	-0.307666	9.34335e-05	0.0168826	included in Figure
f__Ruminococcaceae_ASV13892	PCK1	0.299726	0.000143972	0.0168826	included in Figure
f__Ruminococcaceae_ASV00145	S100A8	-0.290101	0.000239218	0.017606	included in Figure
s__uniformis_ASV03984	S100A8	-0.29274	0.000208494	0.017606	included in Figure
g__Blautia_ASV09918	ISX	0.291839	0.00021854	0.017606	included in Figure
g__Streptococcus_ASV12252	S100A12	0.289857	0.000242253	0.017606	included in Figure
g__Streptococcus_ASV12252	FCGR2A	0.28934	0.000248818	0.017606	included in Figure
s__dispar_ASV13143	LILRB3	0.288592	0.000258619	0.017606	included in Figure
g__Megasphaera_ASV13393	MCEMP1	0.29501	0.000185053	0.017606	included in Figure
g__Megasphaera_ASV13393	S100A8	0.289741	0.000243712	0.017606	included in Figure
g__Megasphaera_ASV13393	HK3	0.295621	0.000179172	0.017606	included in Figure
f__Ruminococcaceae_ASV13892	ISX	0.293808	0.000197137	0.017606	included in Figure
g__Blautia_ASV09918	BNIP3	-0.286666	0.000285508	0.0187166	included in Figure
f__Ruminococcaceae_ASV00145	ACSL1	-0.282476	0.000353192	0.0190022	included in Figure
f__Ruminococcaceae_ASV00145	SPON2	-0.284574	0.000317638	0.0190022	included in Figure
s__uniformis_ASV03984	MCEMP1	-0.284545	0.000318099	0.0190022	included in Figure
s__onderdonkii_ASV05119	FCGR2A	-0.281822	0.000365014	0.0190022	included in Figure
g__Streptococcus_ASV12252	MGAM	0.281828	0.000364905	0.0190022	included in Figure
g__Streptococcus_ASV12252	S100A8	0.282257	0.000357108	0.0190022	included in Figure
f__Ruminococcaceae_ASV13892	SLC26A2	0.283521	0.000335048	0.0190022	included in Figure
s__uniformis_ASV03984	FCAR	-0.280189	0.000396142	0.0192131	included in Figure
g__Campylobacter_ASV05934	BNIP3	0.280706	0.000386019	0.0192131	included in Figure
g__Streptococcus_ASV12252	SLC26A2	-0.279913	0.00040163	0.0192131	included in Figure
s__uniformis_ASV03984	AQP9	-0.279311	0.000413862	0.0192134	included in Figure
g__Ruminococcus_ASV08122	BNIP3	-0.278398	0.000433078	0.0192134	included in Figure
g__Mogibacterium_ASV08676	DYSF	0.277633	0.000449804	0.0192134	included in Figure
g__Blautia_ASV09918	SLC26A2	0.277662	0.000449161	0.0192134	included in Figure
f__Ruminococcaceae_ASV13892	CAPN13	0.277361	0.000455912	0.0192134	included in Figure
f__Ruminococcaceae_ASV00145	DYSF	-0.2719	0.000595533	0.0205335	included in Figure
f__Ruminococcaceae_ASV00145	PROK2	-0.273628	0.000547575	0.0205335	included in Figure
f__Ruminococcaceae_ASV00145	ANXA1	-0.270253	0.000644807	0.0205335	included in Figure
s__uniformis_ASV03984	STEAP4	-0.27178	0.000598995	0.0205335	included in Figure
g__Ruminococcus_ASV08122	C6orf223	-0.273699	0.000545703	0.0205335	included in Figure
g__Mogibacterium_ASV08676	FCGR2A	0.274753	0.000518301	0.0205335	included in Figure
f__Lachnospiraceae_ASV09113	PCK1	0.270224	0.000645727	0.0205335	included in Figure
g__Blautia_ASV09918	ANXA1	-0.275379	0.000502646	0.0205335	included in Figure
g__Bifidobacterium_ASV11471	BNIP3	-0.272196	0.000587065	0.0205335	included in Figure
s__dispar_ASV13143	S100A12	0.27248	0.000579013	0.0205335	included in Figure
g__Megasphaera_ASV13393	ISX	-0.270098	0.000649647	0.0205335	included in Figure
g__Megasphaera_ASV13393	PCK1	-0.27202	0.000592075	0.0205335	included in Figure
f__Ruminococcaceae_ASV13892	MCEMP1	-0.270262	0.000644535	0.0205335	included in Figure
g__Coprococcus_ASV15003	SPON2	-0.270738	0.000629921	0.0205335	included in Figure
g__Actinomyces_ASV08375	PCK1	-0.268906	0.000687893	0.0213609	included in Figure
f__Ruminococcaceae_ASV00145	AQP9	-0.268322	0.00070737	0.021587	included in Figure
f__Ruminococcaceae_ASV00145	STEAP4	-0.267657	0.000730142	0.0216892	included in Figure
f__Ruminococcaceae_ASV00145	C6orf223	-0.267512	0.000735227	0.0216892	included in Figure
g__Coprococcus_ASV15011	FADS1	-0.266586	0.000768315	0.0222937	included in Figure
g__Oscillospira_ASV12634	C6orf223	-0.266182	0.000783149	0.0223576	included in Figure
f__Ruminococcaceae_ASV13892	S100A8	-0.265147	0.000822453	0.023107	included in Figure
f__Ruminococcaceae_ASV00145	SRPX2	-0.261792	0.000962558	0.0250434	included in Figure
s__onderdonkii_ASV05119	MCEMP1	-0.261291	0.000985231	0.0250434	included in Figure
s__onderdonkii_ASV05119	S100A8	-0.262398	0.000935706	0.0250434	included in Figure
g__Mogibacterium_ASV08676	STEAP4	0.261408	0.000979924	0.0250434	included in Figure
g__Streptococcus_ASV12252	STEAP4	0.261521	0.000974752	0.0250434	included in Figure
g__Megasphaera_ASV13393	ANXA1	0.262525	0.000930169	0.0250434	included in Figure
g__Enterococcus_ASV13969	NFE2	0.261179	0.000990416	0.0250434	included in Figure
s__uniformis_ASV03984	LGR6	0.259999	0.0010461	0.0260789	included in Figure
s__uniformis_ASV03984	SLC11A1	-0.25607	0.00125285	0.0273368	included in Figure
g__Campylobacter_ASV05934	S100A12	0.255658	0.00127661	0.0273368	included in Figure
s__parainfluenzae_ASV06380	DYSF	0.25569	0.00127476	0.0273368	included in Figure
g__Mogibacterium_ASV08676	PRSS1	0.25523	0.00130169	0.0273368	included in Figure
f__Lachnospiraceae_ASV09753	BNIP3	-0.255518	0.00128474	0.0273368	included in Figure
g__Streptococcus_ASV12252	LILRB3	0.254785	0.00132823	0.0273368	included in Figure
s__dispar_ASV13143	MCEMP1	0.254828	0.00132565	0.0273368	included in Figure
s__dispar_ASV13143	DYSF	0.257607	0.00116787	0.0273368	included in Figure
g__Megasphaera_ASV13393	SLC26A2	-0.257273	0.00118588	0.0273368	included in Figure
g__Megasphaera_ASV13393	AQP9	0.255062	0.00131165	0.0273368	included in Figure
g__Megasphaera_ASV13393	NFE2	0.254859	0.00132376	0.0273368	included in Figure
f__Ruminococcaceae_ASV13892	S100A12	-0.255743	0.00127164	0.0273368	included in Figure
f__Ruminococcaceae_ASV13892	AQP9	-0.258568	0.0011175	0.0273368	included in Figure
g__Holdemania_ASV14231	C6orf223	-0.256431	0.00123242	0.0273368	included in Figure
g__Coprococcus_ASV15003	ANXA1	-0.257332	0.00118273	0.0273368	included in Figure
g__Blautia_ASV09918	C6orf223	-0.254295	0.001358	0.0274653	included in Figure
f__Ruminococcaceae_ASV13892	NFE2	-0.254173	0.00136551	0.0274653	included in Figure
s__uniformis_ASV03984	ACSL1	-0.253892	0.00138298	0.0275041	included in Figure
s__uniformis_ASV03984	PROK2	-0.253377	0.00141549	0.0275488	included in Figure
g__Enterococcus_ASV13969	S100A12	0.253364	0.00141635	0.0275488	included in Figure
f__Ruminococcaceae_ASV13892	FCGR2A	-0.252563	0.00146835	0.0282498	included in Figure
f__Ruminococcaceae_ASV00145	NFE2	-0.252242	0.00148962	0.0283508	included in Figure
f__Ruminococcaceae_ASV00145	LILRB3	-0.250934	0.00157945	0.0297374	included in Figure
s__dispar_ASV13143	S100A8	0.2507	0.00159607	0.0297374	included in Figure
g__Coprococcus_ASV15011	SPON2	-0.250373	0.0016195	0.0298596	included in Figure
g__Megasphaera_ASV13393	MMP1	0.250033	0.00164423	0.030003	included in Figure
s__onderdonkii_ASV05119	S100A12	-0.249063	0.00171658	0.0303835	included in Figure
g__Ruminococcus_ASV08122	FADS1	-0.24946	0.00168663	0.0303835	included in Figure
g__Actinomyces_ASV08375	S100A12	0.249078	0.00171543	0.0303835	included in Figure
s__prausnitzii_ASV00156	C6orf223	-0.245813	0.00198073	0.0308049	included in Figure
s__onderdonkii_ASV05119	AQP9	-0.244789	0.00207123	0.0308049	included in Figure
g__Campylobacter_ASV05934	DYSF	0.247332	0.00185299	0.0308049	included in Figure
g__Actinomyces_ASV08375	FCGR2A	0.248432	0.00176516	0.0308049	included in Figure
g__Mogibacterium_ASV08676	LILRB3	0.246316	0.00193757	0.0308049	included in Figure
g__Mogibacterium_ASV08676	ISX	-0.247532	0.00183671	0.0308049	included in Figure
g__Mogibacterium_ASV08676	SPON2	0.245739	0.00198711	0.0308049	included in Figure
f__Lachnospiraceae_ASV09113	SPON2	-0.244599	0.00208847	0.0308049	included in Figure
g__Blautia_ASV09594	C6orf223	-0.24508	0.00204513	0.0308049	included in Figure
g__Blautia_ASV09918	CAPN13	0.244935	0.00205815	0.0308049	included in Figure
f__Lachnospiraceae_ASV10079	SPON2	-0.247135	0.00186911	0.0308049	included in Figure
s__dispar_ASV13143	SLC11A1	0.245359	0.00202035	0.0308049	included in Figure
s__parvula_ASV13157	S100A12	0.246546	0.00191805	0.0308049	included in Figure
f__Ruminococcaceae_ASV13892	PROK2	-0.246604	0.00191321	0.0308049	included in Figure
g__Enterococcus_ASV13969	FCAR	0.247409	0.00184666	0.0308049	included in Figure
g__Enterococcus_ASV13969	S100A8	0.24756	0.00183442	0.0308049	included in Figure
g__Enterococcus_ASV13969	AQP9	0.245415	0.00201545	0.0308049	included in Figure
g__Enterococcus_ASV13969	PROK2	0.246013	0.0019634	0.0308049	included in Figure
g__Parvimonas_ASV15121	LGR6	0.247804	0.00181483	0.0308049	included in Figure
g__Dorea_ASV15355	C6orf223	-0.246706	0.00190463	0.0308049	included in Figure
s__uniformis_ASV03984	FCGR2A	-0.244	0.00214358	0.0308466	included in Figure
g__Streptococcus_ASV12252	SRPX2	0.244103	0.00213404	0.0308466	included in Figure
s__dispar_ASV13143	SRPX2	0.244189	0.00212607	0.0308466	included in Figure
g__Streptococcus_ASV12252	ANXA1	0.243406	0.00219953	0.0312486	included in Figure
g__Oscillospira_ASV12634	MCEMP1	-0.24333	0.00220682	0.0312486	included in Figure
g__Ruminococcus_ASV08122	SRPX2	-0.242432	0.00229423	0.0322285	included in Figure
g__Dorea_ASV15355	SPON2	-0.242145	0.00232277	0.0323725	included in Figure
f__Ruminococcaceae_ASV00145	MGAM	-0.241907	0.00234671	0.0324507	included in Figure
g__Streptococcus_ASV12252	FCAR	0.241708	0.00236693	0.0324764	included in Figure
s__uniformis_ASV03984	MGAM	-0.240619	0.00248024	0.0331991	included in Figure
g__Bifidobacterium_ASV11471	PRSS1	-0.240149	0.00253069	0.0331991	included in Figure
s__dispar_ASV13143	PROK2	0.240845	0.00245635	0.0331991	included in Figure
s__dispar_ASV13143	LILRA6	0.240135	0.00253214	0.0331991	included in Figure
f__Ruminococcaceae_ASV13892	SLC11A1	-0.24034	0.00250999	0.0331991	included in Figure
g__Parvimonas_ASV15121	SLC11A1	-0.240205	0.00252464	0.0331991	included in Figure
f__.Mogibacteriaceae._ASV08647	SPON2	-0.239523	0.00259922	0.0338281	included in Figure
s__parvula_ASV13157	MCEMP1	0.239212	0.00263396	0.03403	included in Figure
g__Megasphaera_ASV13393	DYSF	0.23893	0.00266574	0.034191	included in Figure
s__prausnitzii_ASV00156	BNIP3	-0.237409	0.00284348	0.0348598	included in Figure
g__Actinomyces_ASV08375	MMP1	0.237792	0.00279769	0.0348598	included in Figure
g__Blautia_ASV09918	SRPX2	-0.237307	0.00285574	0.0348598	included in Figure
g__Streptococcus_ASV12252	GLT1D1	0.237783	0.00279879	0.0348598	included in Figure
g__Megasphaera_ASV13393	LILRB3	0.237919	0.0027827	0.0348598	included in Figure
g__Megasphaera_ASV13393	PROK2	0.237457	0.0028377	0.0348598	included in Figure
g__Coprococcus_ASV15011	C6orf223	-0.237867	0.00278879	0.0348598	included in Figure
g__Enterococcus_ASV13969	ISX	-0.23682	0.00291513	0.035341	included in Figure
f__Ruminococcaceae_ASV00145	FCAR	-0.234625	0.00319671	0.0360916	included in Figure
s__uniformis_ASV03984	LILRB3	-0.231181	0.00368823	0.0360916	included in Figure
s__uniformis_ASV03984	NFE2	-0.233303	0.00337791	0.0360916	included in Figure
s__onderdonkii_ASV05119	PROK2	-0.235661	0.00306088	0.0360916	included in Figure
g__Campylobacter_ASV05934	MCEMP1	0.233597	0.00333683	0.0360916	included in Figure
g__Campylobacter_ASV05934	S100A8	0.233855	0.00330107	0.0360916	included in Figure
g__Campylobacter_ASV05934	STEAP4	0.233798	0.00330899	0.0360916	included in Figure
s__parainfluenzae_ASV06380	SRPX2	0.231806	0.00359425	0.0360916	included in Figure
s__parainfluenzae_ASV06380	BNIP3	0.234926	0.00315665	0.0360916	included in Figure
s__parainfluenzae_ASV06380	STEAP4	0.231721	0.00360695	0.0360916	included in Figure
g__Ruminococcus_ASV08122	CAPN13	0.232718	0.00346102	0.0360916	included in Figure
g__Actinomyces_ASV08375	S100A8	0.231682	0.00361277	0.0360916	included in Figure
g__Actinomyces_ASV08375	STEAP4	0.233299	0.00337846	0.0360916	included in Figure
o__Clostridiales_ASV08574	HK3	-0.232181	0.00353891	0.0360916	included in Figure
o__Clostridiales_ASV08574	SPON2	-0.235732	0.00305168	0.0360916	included in Figure
f__.Mogibacteriaceae._ASV08647	MCEMP1	-0.232491	0.00349376	0.0360916	included in Figure
f__.Mogibacteriaceae._ASV08647	S100A12	-0.235323	0.00310462	0.0360916	included in Figure
f__.Mogibacteriaceae._ASV08647	FCGR2A	-0.232896	0.00343546	0.0360916	included in Figure
f__.Mogibacteriaceae._ASV08647	NFE2	-0.232952	0.00342752	0.0360916	included in Figure
f__Lachnospiraceae_ASV09113	MCEMP1	-0.23379	0.00331009	0.0360916	included in Figure
f__Lachnospiraceae_ASV10079	C6orf223	-0.235004	0.00314631	0.0360916	included in Figure
g__Adlercreutzia_ASV10589	C6orf223	-0.230898	0.00373151	0.0360916	included in Figure
g__Bifidobacterium_ASV11471	PCK1	0.233632	0.00333196	0.0360916	included in Figure
g__Streptococcus_ASV12252	C6orf223	0.234564	0.00320482	0.0360916	included in Figure
g__Clostridium_ASV12376	CAPN13	0.232455	0.0034989	0.0360916	included in Figure
g__Oscillospira_ASV13659	C6orf223	-0.235653	0.00306186	0.0360916	included in Figure
g__Oscillospira_ASV13741	C6orf223	-0.231136	0.00369508	0.0360916	included in Figure
f__Ruminococcaceae_ASV13892	DYSF	-0.230981	0.00371877	0.0360916	included in Figure
f__Ruminococcaceae_ASV13892	ANXA1	-0.231824	0.00359154	0.0360916	included in Figure
g__Enterococcus_ASV13969	MCEMP1	0.231381	0.0036579	0.0360916	included in Figure
g__Enterococcus_ASV13969	GLT1D1	0.232116	0.00354844	0.0360916	included in Figure
g__Coprococcus_ASV15003	SLC26A2	0.231165	0.00369065	0.0360916	included in Figure
g__Coprococcus_ASV15003	C6orf223	-0.233636	0.00333137	0.0360916	included in Figure
g__Parvimonas_ASV15121	AQP9	-0.234927	0.00315654	0.0360916	included in Figure
g__Parvimonas_ASV15121	HK3	-0.230917	0.00372852	0.0360916	included in Figure
g__Parvimonas_ASV15121	NFE2	-0.233068	0.00341105	0.0360916	included in Figure
g__Parvimonas_ASV15121	PCK1	0.232577	0.00348136	0.0360916	included in Figure
f__Ruminococcaceae_ASV13892	HK3	-0.230749	0.00375436	0.0361153	included in Figure
g__Streptococcus_ASV12252	DYSF	0.230288	0.0038263	0.0366084	included in Figure
g__Streptococcus_ASV12252	AQP9	0.230124	0.00385213	0.0366574	included in Figure
s__parvula_ASV13157	ACSL1	0.22976	0.00391005	0.0368127	included in Figure
g__Anaerostipes_ASV15075	SLC26A2	0.229811	0.00390187	0.0368127	included in Figure
g__Streptococcus_ASV12252	SLC11A1	0.229604	0.00393517	0.0368532	included in Figure
g__Adlercreutzia_ASV10588	CAPN13	0.229338	0.00397825	0.0368665	included in Figure
g__Coprococcus_ASV15003	FADS1	-0.229386	0.00397046	0.0368665	included in Figure
g__Actinomyces_ASV08375	NFE2	0.228789	0.00406852	0.0370133	included in Figure
f__Lachnospiraceae_ASV08865	SPON2	-0.228423	0.00412974	0.0370133	included in Figure
f__Lachnospiraceae_ASV08984	BNIP3	-0.229045	0.0040262	0.0370133	included in Figure
g__Blautia_ASV09594	BNIP3	-0.228703	0.0040828	0.0370133	included in Figure
g__Adlercreutzia_ASV10588	C6orf223	-0.22836	0.00414047	0.0370133	included in Figure
f__Ruminococcaceae_ASV13892	SPON2	-0.228739	0.00407693	0.0370133	included in Figure
g__Dorea_ASV15355	ANXA1	-0.228428	0.004129	0.0370133	included in Figure
f__Ruminococcaceae_ASV00145	PCK1	0.228173	0.00417211	0.0370672	included in Figure
g__Megasphaera_ASV13393	FCAR	0.227955	0.00420933	0.0370672	included in Figure
g__Anaerostipes_ASV15075	S100A12	-0.227991	0.00420303	0.0370672	included in Figure
g__Blautia_ASV09918	SPON2	-0.22763	0.00426525	0.0370861	included in Figure
g__Bifidobacterium_ASV11471	SPON2	-0.227661	0.00425989	0.0370861	included in Figure
s__dispar_ASV13143	NFE2	0.227578	0.00427433	0.0370861	included in Figure
g__Campylobacter_ASV05934	PCK1	-0.226752	0.00441995	0.0373489	included in Figure
g__Ruminococcus_ASV08122	HK3	-0.226873	0.00439835	0.0373489	included in Figure
g__Actinomyces_ASV08375	BNIP3	0.227244	0.00433257	0.0373489	included in Figure
s__parvula_ASV13157	S100A8	0.226689	0.00443123	0.0373489	included in Figure
g__Parvimonas_ASV15121	S100A8	-0.226829	0.00440613	0.0373489	included in Figure
g__Fusobacterium_ASV15522	HK3	0.226959	0.00438293	0.0373489	included in Figure
s__uniformis_ASV03984	GLT1D1	-0.226247	0.00451113	0.0374869	included in Figure
s__parainfluenzae_ASV06380	SPON2	0.226293	0.00450279	0.0374869	included in Figure
g__Bifidobacterium_ASV11471	ANXA1	-0.226384	0.00448609	0.0374869	included in Figure
s__onderdonkii_ASV05119	NFE2	-0.225576	0.0046349	0.0380491	included in Figure
g__Mogibacterium_ASV08676	PCK1	-0.225416	0.00466478	0.0380491	included in Figure
f__Lachnospiraceae_ASV08865	DYSF	-0.225471	0.00465449	0.0380491	included in Figure
g__Coprococcus_ASV15003	MCEMP1	-0.225612	0.00462819	0.0380491	included in Figure
g__Streptococcus_ASV12252	PCK1	-0.225102	0.00472418	0.0383569	included in Figure
f__Ruminococcaceae_ASV00145	GLT1D1	-0.224696	0.00480187	0.0384584	included in Figure
g__Streptococcus_ASV12252	LILRA6	0.224784	0.00478495	0.0384584	included in Figure
f__Ruminococcaceae_ASV13892	MMP1	-0.224763	0.00478886	0.0384584	included in Figure
g__Campylobacter_ASV05934	SLC26A2	-0.224234	0.00489166	0.0390011	included in Figure
g__Megasphaera_ASV13393	GLT1D1	0.223968	0.0049441	0.0392424	included in Figure
f__.Mogibacteriaceae._ASV08647	FCAR	-0.223703	0.00499668	0.0393072	included in Figure
g__Mogibacterium_ASV08676	SRPX2	0.223725	0.0049923	0.0393072	included in Figure
s__parainfluenzae_ASV06380	LILRB3	0.2234	0.00505758	0.0394357	included in Figure
g__Streptococcus_ASV12252	HK3	0.223502	0.005037	0.0394357	included in Figure
g__Actinomyces_ASV08375	ISX	-0.222975	0.00514403	0.0395362	included in Figure
o__Clostridiales_ASV08574	C6orf223	-0.223036	0.00513148	0.0395362	included in Figure
s__parvula_ASV13157	STEAP4	0.222898	0.00515981	0.0395362	included in Figure
g__Enterococcus_ASV13969	FADS1	0.222919	0.00515546	0.0395362	included in Figure
f__Ruminococcaceae_ASV00145	SLC11A1	-0.221982	0.00535136	0.0396366	included in Figure
f__.Mogibacteriaceae._ASV08647	SRPX2	-0.221664	0.00541924	0.0396366	included in Figure
g__Mogibacterium_ASV08676	MCEMP1	0.222576	0.00522635	0.0396366	included in Figure
g__Blautia_ASV09078	ANXA1	-0.222358	0.00527193	0.0396366	included in Figure
f__Lachnospiraceae_ASV10079	BNIP3	-0.221812	0.0053875	0.0396366	included in Figure
g__Streptococcus_ASV12252	NFE2	0.222079	0.00533076	0.0396366	included in Figure
s__dispar_ASV13143	HK3	0.222495	0.00524325	0.0396366	included in Figure
g__Coprococcus_ASV15003	S100A12	-0.221884	0.00537221	0.0396366	included in Figure
g__Coprococcus_ASV15003	PROK2	-0.221775	0.00539534	0.0396366	included in Figure
g__Parvimonas_ASV15121	MCEMP1	-0.221858	0.00537774	0.0396366	included in Figure
g__Fusobacterium_ASV15522	C6orf223	0.221711	0.00540902	0.0396366	included in Figure
g__Megasphaera_ASV13393	FADS1	0.221327	0.00549203	0.0400037	included in Figure
g__Streptococcus_ASV12252	ACSL1	0.221105	0.00554036	0.0400263	included in Figure
s__dispar_ASV13143	FCAR	0.221189	0.00552205	0.0400263	included in Figure
s__prausnitzii_ASV00156	ACSL1	-0.220743	0.00562025	0.0402747	included in Figure
g__Fusobacterium_ASV15520	S100A12	0.220835	0.0056	0.0402747	included in Figure
g__Actinomyces_ASV08375	MCEMP1	0.220551	0.00566313	0.0403595	included in Figure
f__Lachnospiraceae_ASV09113	SRPX2	-0.220485	0.00567769	0.0403595	included in Figure
f__Lachnospiraceae_ASV09113	NFE2	-0.220315	0.00571589	0.0404081	included in Figure
g__Adlercreutzia_ASV10589	BNIP3	-0.220151	0.00575301	0.0404081	included in Figure
g__Enterococcus_ASV13969	DYSF	0.220162	0.00575064	0.0404081	included in Figure
g__Parvimonas_ASV15121	SRPX2	-0.22002	0.00578276	0.0404565	included in Figure
g__Streptococcus_ASV12252	SPON2	0.219892	0.00581197	0.0405007	included in Figure
g__Parvimonas_ASV15121	PROK2	-0.219472	0.0059088	0.041014	included in Figure
s__onderdonkii_ASV05119	ACSL1	-0.219047	0.00600821	0.0413955	included in Figure
f__Lachnospiraceae_ASV09113	DYSF	-0.219037	0.00601053	0.0413955	included in Figure
g__Ruminococcus_ASV08122	LGR6	0.218736	0.00608171	0.0417233	included in Figure
g__Paraprevotella_ASV02736	PRSS1	-0.21852	0.00613327	0.0417554	included in Figure
f__Lachnospiraceae_ASV09977	FCGR2A	-0.218519	0.00613356	0.0417554	included in Figure
s__prausnitzii_ASV00156	S100A12	-0.21824	0.00620098	0.0417915	included in Figure
s__uniformis_ASV03984	LILRA6	-0.217856	0.0062945	0.0417915	included in Figure
g__Campylobacter_ASV05934	GLT1D1	0.217984	0.00626312	0.0417915	included in Figure
g__Actinomyces_ASV08375	LGR6	-0.2181	0.00623493	0.0417915	included in Figure
g__Mogibacterium_ASV08676	LILRA6	0.217816	0.00630427	0.0417915	included in Figure
g__Clostridium_ASV12376	LGR6	0.217735	0.00632423	0.0417915	included in Figure
g__Oscillospira_ASV12634	S100A12	-0.217721	0.00632775	0.0417915	included in Figure
g__Dorea_ASV15355	SLC26A2	0.218395	0.00616333	0.0417915	included in Figure
f__Coriobacteriaceae_ASV10586	C6orf223	-0.217621	0.00635252	0.0417991	included in Figure
f__Lachnospiraceae_ASV09753	C6orf223	-0.217224	0.00645151	0.0422932	included in Figure
f__.Mogibacteriaceae._ASV08647	AQP9	-0.216835	0.00654971	0.0427785	included in Figure
s__dispar_ASV13143	ANXA1	0.216294	0.00668862	0.0435252	included in Figure
s__dispar_ASV13143	FCGR2A	0.216042	0.00675409	0.0436304	included in Figure
s__faecis_ASV15263	SPON2	-0.216046	0.00675323	0.0436304	included in Figure
s__uniformis_ASV03984	DYSF	-0.215692	0.00684616	0.0437258	included in Figure
s__parainfluenzae_ASV06380	MCEMP1	0.215377	0.00693013	0.0437258	included in Figure
g__Blautia_ASV09078	ISX	0.215241	0.00696648	0.0437258	included in Figure
g__Blautia_ASV09078	HK3	-0.215436	0.00691437	0.0437258	included in Figure
s__clostridioforme_ASV09123	BNIP3	-0.215248	0.00696463	0.0437258	included in Figure
g__Enterococcus_ASV13969	PCK1	-0.215541	0.00688642	0.0437258	included in Figure
g__Coprococcus_ASV15003	NFE2	-0.215513	0.00689363	0.0437258	included in Figure
s__faecis_ASV15263	FCGR2A	-0.215461	0.00690759	0.0437258	included in Figure
g__Actinomyces_ASV08375	LILRB3	0.214697	0.00711408	0.0444944	included in Figure
g__Enterococcus_ASV13969	MMP1	0.214475	0.00717506	0.0447178	included in Figure
g__Campylobacter_ASV05934	NFE2	0.213936	0.00732509	0.0448523	included in Figure
s__parainfluenzae_ASV06380	ACSL1	0.213666	0.00740124	0.0448523	included in Figure
f__.Mogibacteriaceae._ASV08647	ACSL1	-0.213809	0.00736093	0.0448523	included in Figure
f__.Mogibacteriaceae._ASV08647	DYSF	-0.213944	0.00732288	0.0448523	included in Figure
g__Blautia_ASV09078	SPON2	-0.213767	0.00737268	0.0448523	included in Figure
f__Lachnospiraceae_ASV09977	ACSL1	-0.213584	0.0074247	0.0448523	included in Figure
g__Streptococcus_ASV12252	PROK2	0.213636	0.00740988	0.0448523	included in Figure
g__Clostridium_ASV12376	FCGR2A	-0.214288	0.00722675	0.0448523	included in Figure
g__Parvimonas_ASV15121	MMP1	-0.213603	0.00741922	0.0448523	included in Figure
f__Ruminococcaceae_ASV07190	BNIP3	-0.213126	0.00755588	0.0452577	included in Figure
f__.Mogibacteriaceae._ASV08647	S100A8	-0.213229	0.0075261	0.0452577	included in Figure
f__.Mogibacteriaceae._ASV08647	STEAP4	-0.213082	0.00756852	0.0452577	included in Figure
g__Blautia_ASV09078	C6orf223	-0.212737	0.00766903	0.0454017	included in Figure
g__Blautia_ASV09918	S100A12	-0.212735	0.00766955	0.0454017	included in Figure
g__Blautia_ASV09918	HK3	-0.212801	0.00765014	0.0454017	included in Figure
g__Blautia_ASV09918	STEAP4	-0.212501	0.00773832	0.0456561	included in Figure
f__Ruminococcaceae_ASV00145	LGR6	0.212141	0.0078452	0.045737	included in Figure
s__onderdonkii_ASV05119	FCAR	-0.212296	0.00779888	0.045737	included in Figure
g__Oscillospira_ASV12634	FCGR2A	-0.212163	0.0078387	0.045737	included in Figure
g__Coprococcus_ASV15003	ACSL1	-0.212107	0.0078554	0.045737	included in Figure
s__parainfluenzae_ASV06380	S100A12	0.211779	0.00795393	0.0459162	included in Figure
s__dispar_ASV13143	STEAP4	0.211879	0.00792374	0.0459162	included in Figure
g__Coprococcus_ASV15003	PCK1	0.211746	0.00796399	0.0459162	included in Figure
f__Lachnospiraceae_ASV14891	SRPX2	-0.211453	0.00805298	0.0462785	included in Figure
g__Paraprevotella_ASV02736	HK3	-0.210911	0.00822006	0.0469339	included in Figure
g__Ruminococcus_ASV07554	BNIP3	-0.210933	0.00821321	0.0469339	included in Figure
s__uniformis_ASV03984	HK3	-0.210757	0.00826836	0.0470579	included in Figure
g__Bifidobacterium_ASV11471	PROK2	-0.210221	0.00843747	0.0478664	included in Figure
g__Megasphaera_ASV13393	SLC11A1	0.210121	0.00846927	0.0478933	included in Figure
g__Paraprevotella_ASV02736	C6orf223	-0.209929	0.00853077	0.0480874	included in Figure
f__.Mogibacteriaceae._ASV08647	PROK2	-0.209571	0.00864667	0.0485861	included in Figure
f__Ruminococcaceae_ASV13704	C6orf223	-0.209308	0.00873268	0.0489141	included in Figure
g__Mogibacterium_ASV08676	AQP9	0.209171	0.00877769	0.0490111	included in Figure
g__Actinomyces_ASV08375	SRPX2	0.209024	0.00882633	0.0491277	included in Figure
s__dispar_ASV13143	AQP9	0.208635	0.00895627	0.0495393	included in Figure
g__Parvimonas_ASV15121	S100A12	-0.208696	0.00893584	0.0495393	included in Figure
f__Ruminococcaceae_ASV00145	SLC26A2	0.207888	0.00921014	0.0496156	included in Figure
s__onderdonkii_ASV05119	C6orf223	-0.207736	0.00926275	0.0496156	included in Figure
f__Lachnospiraceae_ASV08984	S100A12	-0.207756	0.00925555	0.0496156	included in Figure
g__Adlercreutzia_ASV10588	ISX	0.208082	0.00914352	0.0496156	included in Figure
s__parvula_ASV13157	DYSF	0.208217	0.00909743	0.0496156	included in Figure
s__parvula_ASV13157	FCGR2A	0.208489	0.00900539	0.0496156	included in Figure
g__Megasphaera_ASV13393	MGAM	0.20769	0.0092784	0.0496156	included in Figure
f__Ruminococcaceae_ASV13892	FCAR	-0.207916	0.00920061	0.0496156	included in Figure
g__Anaerostipes_ASV15075	S100A8	-0.207925	0.00919756	0.0496156	included in Figure
s__faecis_ASV15263	C6orf223	-0.208327	0.00906003	0.0496156	included in Figure
g__Fusobacterium_ASV15520	LGR6	-0.208105	0.00913586	0.0496156	included in Figure
f__Lachnospiraceae_ASV09170	C6orf223	-0.207444	0.00936399	0.0497726	included in Figure
f__Ruminococcaceae_ASV13892	BNIP3	-0.207513	0.00934002	0.0497726	included in Figure
f__Ruminococcaceae_ASV00145	MMP1	-0.206902	0.00955513	0.0503691	included in Figure
s__onderdonkii_ASV05119	LILRB3	-0.206741	0.00961258	0.0503691	included in Figure
g__Clostridium_ASV12376	PCK1	0.206653	0.00964386	0.0503691	included in Figure
g__Megasphaera_ASV13393	STEAP4	0.206871	0.00956617	0.0503691	included in Figure
f__Ruminococcaceae_ASV13704	LILRA6	-0.206645	0.00964697	0.0503691	included in Figure
g__Coprococcus_ASV15003	PRSS1	-0.207026	0.009511	0.0503691	included in Figure
g__Enterococcus_ASV13969	SLC11A1	0.206498	0.0096998	0.050496	included in Figure
g__Campylobacter_ASV05934	LILRA6	0.206135	0.00983131	0.0507127	included in Figure
g__Blautia_ASV09918	S100A8	-0.20599	0.00988444	0.0507127	included in Figure
g__Bifidobacterium_ASV11471	DYSF	-0.206222	0.00979949	0.0507127	included in Figure
g__Parvimonas_ASV15121	CAPN13	0.206032	0.00986891	0.0507127	included in Figure
s__faecis_ASV15263	BNIP3	-0.205989	0.00988468	0.0507127	included in Figure
g__Mogibacterium_ASV08676	ACSL1	0.205823	0.00994572	0.0508653	included in Figure
s__dispar_ASV13143	MGAM	0.205752	0.00997189	0.0508653	included in Figure
g__Actinomyces_ASV08375	SLC26A2	-0.20544	0.0100875	0.0513072	included in Figure
g__Campylobacter_ASV05934	ACSL1	0.205174	0.0101873	0.0513719	included in Figure
g__Streptococcus_ASV12252	ISX	-0.205255	0.0101568	0.0513719	included in Figure
g__Oscillospira_ASV12634	ACSL1	-0.205199	0.0101778	0.0513719	included in Figure
g__Bifidobacterium_ASV11471	C6orf223	-0.20469	0.0103709	0.0519816	included in Figure
g__Bifidobacterium_ASV11471	NFE2	-0.204623	0.0103963	0.0519816	included in Figure
g__Coprococcus_ASV15003	S100A8	-0.204722	0.0103584	0.0519816	included in Figure
g__Dorea_ASV15355	MMP1	-0.204328	0.0105099	0.0524016	included in Figure
g__Streptococcus_ASV12252	LGR6	-0.203964	0.0106517	0.0529593	included in Figure
g__Mogibacterium_ASV08676	LGR6	-0.203706	0.0107531	0.0532188	included in Figure
g__Blautia_ASV09918	DYSF	-0.203678	0.010764	0.0532188	included in Figure
g__Ruminococcus_ASV07554	SPON2	-0.203556	0.0108123	0.0533084	included in Figure
g__Anaerostipes_ASV15075	MCEMP1	-0.203438	0.0108591	0.0533903	included in Figure
s__dispar_ASV13143	ACSL1	0.202978	0.0110434	0.0541463	included in Figure
s__dispar_ASV13143	BNIP3	0.202804	0.0111139	0.0543416	included in Figure
g__Megasphaera_ASV13393	FCGR2A	0.202505	0.0112362	0.0547882	included in Figure
f__Lachnospiraceae_ASV08865	LILRB3	-0.202218	0.0113543	0.0549103	included in Figure
f__Lachnospiraceae_ASV09113	HK3	-0.202223	0.0113523	0.0549103	included in Figure
f__Lachnospiraceae_ASV10079	HK3	-0.202368	0.0112924	0.0549103	included in Figure
s__prausnitzii_ASV00156	FCGR2A	-0.201597	0.0116139	0.0549643	included in Figure
g__Ruminococcus_ASV07554	HK3	-0.201825	0.011518	0.0549643	included in Figure
g__Ruminococcus_ASV08122	ANXA1	-0.201696	0.0115723	0.0549643	included in Figure
g__Mogibacterium_ASV08676	MGAM	0.201949	0.0114664	0.0549643	included in Figure
g__Streptococcus_ASV12252	MMP1	0.20185	0.0115075	0.0549643	included in Figure
g__Clostridium_ASV12376	BNIP3	-0.201737	0.0115551	0.0549643	included in Figure
g__Megasphaera_ASV13393	LILRA6	0.201641	0.0115954	0.0549643	included in Figure
g__Fusobacterium_ASV15520	S100A8	0.202021	0.011436	0.0549643	included in Figure
g__Campylobacter_ASV05934	LILRB3	0.201293	0.011743	0.0552136	included in Figure
g__Blautia_ASV09918	LILRA6	-0.201107	0.0118226	0.0552136	included in Figure
s__parvula_ASV13157	LILRB3	0.20117	0.0117955	0.0552136	included in Figure
g__Oscillospira_ASV13741	PCK1	0.201138	0.0118091	0.0552136	included in Figure
g__Dorea_ASV15355	S100A12	-0.201189	0.0117873	0.0552136	included in Figure
g__Blautia_ASV09918	FADS1	-0.200829	0.0119424	0.0556267	included in Figure
o__Clostridiales_ASV15397	BNIP3	-0.200732	0.0119842	0.0556749	included in Figure
g__Mogibacterium_ASV08676	SLC11A1	0.200522	0.0120756	0.0557449	included in Figure
g__Blautia_ASV09918	LILRB3	-0.200481	0.0120938	0.0557449	included in Figure
g__Coprococcus_ASV15003	STEAP4	-0.200571	0.0120544	0.0557449	included in Figure
f__Ruminococcaceae_ASV13704	FCGR2A	-0.200153	0.0122379	0.0562625	included in Figure
g__Fusobacterium_ASV15520	ISX	-0.200046	0.0122854	0.0563347	included in Figure
g__Clostridium_ASV12376	ISX	0.199931	0.0123365	0.0564227	included in Figure
g__Ruminococcus_ASV07554	MCEMP1	-0.199551	0.0125068	0.0564718	included in Figure
g__Actinomyces_ASV08375	GLT1D1	0.199685	0.0124462	0.0564718	included in Figure
g__Clostridium_ASV12376	S100A12	-0.199801	0.0123944	0.0564718	included in Figure
f__Ruminococcaceae_ASV13704	MGAM	-0.1996	0.0124846	0.0564718	included in Figure
s__faecis_ASV15263	ACSL1	-0.19967	0.0124531	0.0564718	included in Figure
s__parainfluenzae_ASV06380	LILRA6	0.199365	0.0125909	0.0566616	included in Figure
f__.Mogibacteriaceae._ASV08647	ANXA1	-0.198966	0.0127729	0.0566616	included in Figure
g__Mogibacterium_ASV08676	S100A8	0.199094	0.0127141	0.0566616	included in Figure
f__Lachnospiraceae_ASV09977	AQP9	-0.19899	0.0127617	0.0566616	included in Figure
g__Adlercreutzia_ASV10589	S100A12	-0.199153	0.012687	0.0566616	included in Figure
s__parvula_ASV13157	PROK2	0.199002	0.0127559	0.0566616	included in Figure
g__Anaerostipes_ASV15075	ISX	0.199195	0.0126681	0.0566616	included in Figure
g__Anaerostipes_ASV15075	CAPN13	0.198464	0.0130049	0.0575469	included in Figure
g__Megasphaera_ASV13393	SPON2	0.19838	0.0130442	0.0575768	included in Figure
g__Mogibacterium_ASV08676	ANXA1	0.198151	0.0131517	0.0579068	included in Figure
f__Lachnospiraceae_ASV08865	SRPX2	-0.198067	0.013191	0.0579358	included in Figure
f__Ruminococcaceae_ASV00145	HK3	-0.197953	0.0132453	0.057977	included in Figure
g__Campylobacter_ASV05934	ANXA1	0.197801	0.0133172	0.057977	included in Figure
s__dispar_ASV13143	MMP1	0.197703	0.0133642	0.057977	included in Figure
s__parvula_ASV13157	MGAM	0.197797	0.0133194	0.057977	included in Figure
g__Enterococcus_ASV13969	STEAP4	0.197706	0.0133627	0.057977	included in Figure
f__.Mogibacteriaceae._ASV08647	BNIP3	-0.197575	0.0134252	0.0580995	included in Figure
s__parainfluenzae_ASV06380	C6orf223	0.197069	0.0136695	0.0581613	included in Figure
o__Clostridiales_ASV08574	SRPX2	-0.197253	0.0135803	0.0581613	included in Figure
f__.Mogibacteriaceae._ASV08647	MMP1	-0.197176	0.0136176	0.0581613	included in Figure
f__Lachnospiraceae_ASV09113	ACSL1	-0.197085	0.013662	0.0581613	included in Figure
g__Blautia_ASV09918	MCEMP1	-0.197255	0.0135794	0.0581613	included in Figure
g__Roseburia_ASV15174	LGR6	0.197091	0.0136588	0.0581613	included in Figure
g__Roseburia_ASV15174	SPON2	-0.197306	0.0135547	0.0581613	included in Figure
s__prausnitzii_ASV00156	S100A8	-0.196772	0.0138152	0.0585089	included in Figure
f__Lachnospiraceae_ASV08984	MCEMP1	-0.196767	0.0138174	0.0585089	included in Figure
s__prausnitzii_ASV00156	SRPX2	-0.19656	0.0139196	0.0585278	included in Figure
o__Clostridiales_ASV08574	FADS1	-0.196479	0.0139599	0.0585278	included in Figure
f__Lachnospiraceae_ASV08865	STEAP4	-0.196597	0.0139015	0.0585278	included in Figure
f__Lachnospiraceae_ASV09170	HK3	-0.196357	0.0140202	0.0585278	included in Figure
f__Ruminococcaceae_ASV13704	MCEMP1	-0.196409	0.0139945	0.0585278	included in Figure
g__Coprococcus_ASV15003	BNIP3	-0.196554	0.0139227	0.0585278	included in Figure
f__Lachnospiraceae_ASV08984	C6orf223	-0.19602	0.0141893	0.0585536	included in Figure
g__Blautia_ASV09078	DYSF	-0.196024	0.0141871	0.0585536	included in Figure
g__Bifidobacterium_ASV11471	ACSL1	-0.196202	0.0140977	0.0585536	included in Figure
g__Oscillospira_ASV13741	PRSS1	-0.196034	0.0141819	0.0585536	included in Figure
f__Ruminococcaceae_ASV13892	MGAM	-0.196015	0.0141918	0.0585536	included in Figure
f__Lachnospiraceae_ASV10079	PRSS1	-0.195939	0.0142297	0.0585734	included in Figure
s__dispar_ASV13143	SPON2	0.195561	0.0144216	0.0592256	included in Figure
g__Campylobacter_ASV05934	FADS1	0.195184	0.0146152	0.0595236	included in Figure
f__.Mogibacteriaceae._ASV08647	PCK1	0.19498	0.0147211	0.0595236	included in Figure
g__Bifidobacterium_ASV11471	AQP9	-0.19528	0.0145658	0.0595236	included in Figure
g__Oscillospira_ASV12634	S100A8	-0.195255	0.0145787	0.0595236	included in Figure
f__Ruminococcaceae_ASV13704	PROK2	-0.194899	0.0147632	0.0595236	included in Figure
f__Ruminococcaceae_ASV13892	PRSS1	-0.194992	0.0147149	0.0595236	included in Figure
g__Enterococcus_ASV13969	MGAM	0.195113	0.0146519	0.0595236	included in Figure
g__Anaerostipes_ASV15075	PCK1	0.194951	0.014736	0.0595236	included in Figure
s__prausnitzii_ASV00156	FCAR	-0.194827	0.0148007	0.059539	included in Figure
s__uniformis_ASV03984	ISX	0.194567	0.0149369	0.0599508	included in Figure
g__Megasphaera_ASV13393	SRPX2	0.194397	0.0150269	0.0601758	included in Figure
g__Campylobacter_ASV05934	AQP9	0.194163	0.0151509	0.0605353	included in Figure
f__Ruminococcaceae_ASV13892	ACSL1	-0.193988	0.0152446	0.0606359	included in Figure
g__Coprococcus_ASV15003	ISX	0.194014	0.0152307	0.0606359	included in Figure
s__prausnitzii_ASV00156	MCEMP1	-0.193746	0.0153748	0.06088	included in Figure
g__Blautia_ASV09078	ACSL1	-0.193749	0.0153727	0.06088	included in Figure
f__Ruminococcaceae_ASV13892	LGR6	0.19359	0.0154587	0.0610759	included in Figure
s__uniformis_ASV03984	ANXA1	-0.193409	0.0155574	0.0610824	included in Figure
s__parainfluenzae_ASV06380	ANXA1	0.193298	0.015618	0.0610824	included in Figure
f__Lachnospiraceae_ASV09753	S100A12	-0.193271	0.015633	0.0610824	included in Figure
g__Oscillospira_ASV13741	BNIP3	-0.193391	0.0155671	0.0610824	included in Figure
g__Enterococcus_ASV13969	PRSS1	0.193501	0.0155074	0.0610824	included in Figure
g__Mogibacterium_ASV08676	GLT1D1	0.193109	0.0157219	0.0612946	included in Figure
g__Campylobacter_ASV05934	PROK2	0.192959	0.0158044	0.061481	included in Figure
f__Lachnospiraceae_ASV09113	STEAP4	-0.192823	0.0158796	0.0616378	included in Figure
g__Paraprevotella_ASV02736	FADS1	-0.192577	0.016017	0.0617647	included in Figure
f__Lachnospiraceae_ASV08865	HK3	-0.192622	0.0159919	0.0617647	included in Figure
g__Dorea_ASV15355	ISX	0.19266	0.0159703	0.0617647	included in Figure
f__Lachnospiraceae_ASV09113	S100A12	-0.192372	0.0161319	0.0620726	included in Figure
g__Blautia_ASV09078	STEAP4	-0.192186	0.0162367	0.0621677	included in Figure
g__Enterococcus_ASV13969	CAPN13	-0.192224	0.0162152	0.0621677	included in Figure
g__Fusobacterium_ASV15522	ISX	-0.192142	0.0162619	0.0621677	included in Figure
g__Mogibacterium_ASV08676	FCAR	0.191852	0.0164269	0.0625777	included in Figure
f__Lachnospiraceae_ASV09113	S100A8	-0.1918	0.0164568	0.0625777	included in Figure
g__Adlercreutzia_ASV10588	SLC26A2	0.191767	0.0164753	0.0625777	included in Figure
g__Parvimonas_ASV15121	SPON2	-0.191688	0.016521	0.0626169	included in Figure
g__Mogibacterium_ASV08676	S100A12	0.191377	0.0167003	0.0631615	included in Figure
f__Coriobacteriaceae_ASV10586	SPON2	-0.190988	0.0169273	0.0638833	included in Figure
g__Enterococcus_ASV13969	LILRB3	0.190444	0.0172494	0.0649605	included in Figure
f__Lachnospiraceae_ASV14891	C6orf223	-0.190253	0.0173633	0.0652506	included in Figure
f__Ruminococcaceae_ASV13892	GLT1D1	-0.190097	0.0174575	0.0654655	included in Figure
f__Lachnospiraceae_ASV09113	SLC26A2	0.189975	0.0175311	0.0656028	included in Figure
g__Coprococcus_ASV15011	ACSL1	-0.189882	0.0175876	0.0656753	included in Figure
f__Coriobacteriaceae_ASV10586	MMP1	-0.189665	0.0177192	0.0660274	included in Figure
g__Blautia_ASV09594	SPON2	-0.189534	0.0177996	0.0660488	included in Figure
g__Dorea_ASV15355	BNIP3	-0.189538	0.0177971	0.0660488	included in Figure
s__uniformis_ASV03984	SRPX2	-0.189373	0.0178983	0.0661378	included in Figure
g__Dorea_ASV15355	PCK1	0.189386	0.0178904	0.0661378	included in Figure
g__Anaerostipes_ASV15075	LGR6	0.18924	0.0179806	0.0663034	included in Figure
f__Ruminococcaceae_ASV00145	PRSS1	-0.189159	0.0180308	0.0663503	included in Figure
s__onderdonkii_ASV05119	BNIP3	-0.188137	0.0186741	0.0669959	included in Figure
g__Campylobacter_ASV05934	SPON2	0.188268	0.0185902	0.0669959	included in Figure
g__Ruminococcus_ASV07554	ANXA1	-0.188395	0.0185098	0.0669959	included in Figure
g__Actinomyces_ASV08375	SLC11A1	0.188363	0.0185299	0.0669959	included in Figure
f__Lachnospiraceae_ASV09170	ANXA1	-0.188242	0.0186071	0.0669959	included in Figure
f__Coriobacteriaceae_ASV10586	ANXA1	-0.188285	0.0185795	0.0669959	included in Figure
g__Clostridium_ASV12376	MCEMP1	-0.18854	0.0184183	0.0669959	included in Figure
s__dispar_ASV13143	GLT1D1	0.188799	0.0182552	0.0669959	included in Figure
s__parvula_ASV13157	NFE2	0.188144	0.0186696	0.0669959	included in Figure
g__Megasphaera_ASV13393	CAPN13	-0.188467	0.0184643	0.0669959	included in Figure
f__Ruminococcaceae_ASV13704	S100A12	-0.188442	0.0184797	0.0669959	included in Figure
g__Holdemania_ASV14231	SPON2	-0.188477	0.0184579	0.0669959	included in Figure
s__faecis_ASV15263	ANXA1	-0.188099	0.0186983	0.0669959	included in Figure
g__Ruminococcus_ASV07554	ACSL1	-0.187795	0.018894	0.0671104	included in Figure
g__Actinomyces_ASV08375	ANXA1	0.187691	0.0189607	0.0671104	included in Figure
g__Adlercreutzia_ASV10589	S100A8	-0.187643	0.0189923	0.0671104	included in Figure
g__Clostridium_ASV12376	S100A8	-0.187639	0.0189946	0.0671104	included in Figure
g__Megasphaera_ASV13393	LGR6	-0.187855	0.0188547	0.0671104	included in Figure
f__Ruminococcaceae_ASV13704	AQP9	-0.187868	0.0188468	0.0671104	included in Figure
g__Fusobacterium_ASV15522	ANXA1	0.187637	0.0189957	0.0671104	included in Figure
s__uniformis_ASV03984	PRSS1	-0.187535	0.0190621	0.0672112	included in Figure
g__Ruminococcus_ASV08122	MCEMP1	-0.187256	0.0192445	0.0674801	included in Figure
f__.Mogibacteriaceae._ASV08647	LGR6	0.187179	0.0192952	0.0674801	included in Figure
f__Lachnospiraceae_ASV08865	C6orf223	-0.187069	0.0193672	0.0674801	included in Figure
f__Lachnospiraceae_ASV14891	ANXA1	-0.187166	0.0193034	0.0674801	included in Figure
g__Coprococcus_ASV15011	ANXA1	-0.187157	0.0193094	0.0674801	included in Figure
g__Fusobacterium_ASV15520	PROK2	0.187094	0.0193513	0.0674801	included in Figure
f__Lachnospiraceae_ASV08984	S100A8	-0.186938	0.0194543	0.0676505	included in Figure
g__Mogibacterium_ASV08676	PROK2	0.186742	0.0195841	0.0679684	included in Figure
s__parvula_ASV13157	AQP9	0.186494	0.01975	0.0684099	included in Figure
g__Coprococcus_ASV15011	SRPX2	-0.186223	0.0199325	0.0687728	included in Figure
g__Parvimonas_ASV15121	FCAR	-0.186275	0.0198973	0.0687728	included in Figure
g__Ruminococcus_ASV08122	SPON2	-0.186084	0.0200268	0.0688077	included in Figure
g__Bifidobacterium_ASV11471	GLT1D1	-0.185924	0.0201354	0.0688077	included in Figure
g__Oscillospira_ASV12634	SPON2	-0.185922	0.0201369	0.0688077	included in Figure
g__Anaerostipes_ASV15075	PROK2	-0.186032	0.0200619	0.0688077	included in Figure
s__faecis_ASV15263	MCEMP1	-0.185943	0.0201227	0.0688077	included in Figure
g__Dorea_ASV15355	MCEMP1	-0.185586	0.0203675	0.0694615	included in Figure
g__Ruminococcus_ASV07554	C6orf223	-0.185376	0.0205126	0.0696877	included in Figure
g__Adlercreutzia_ASV10589	ACSL1	-0.18538	0.0205092	0.0696877	included in Figure
f__Ruminococcaceae_ASV13704	ACSL1	-0.184957	0.0208043	0.0705432	included in Figure
g__Ruminococcus_ASV08122	SLC26A2	0.184885	0.0208552	0.0705807	included in Figure
s__onderdonkii_ASV05119	GLT1D1	-0.184466	0.0211515	0.0707718	included in Figure
g__Blautia_ASV09594	ANXA1	-0.184637	0.0210301	0.0707718	included in Figure
f__Lachnospiraceae_ASV10079	ANXA1	-0.184503	0.021125	0.0707718	included in Figure
g__Bifidobacterium_ASV11471	S100A8	-0.18451	0.0211201	0.0707718	included in Figure
g__Bifidobacterium_ASV11471	LILRB3	-0.184466	0.0211516	0.0707718	included in Figure
g__Fusobacterium_ASV15522	SRPX2	0.184592	0.021062	0.0707718	included in Figure
g__Bilophila_ASV05654	SPON2	-0.183893	0.0215629	0.0716066	included in Figure
g__Bifidobacterium_ASV11471	ISX	0.183931	0.021535	0.0716066	included in Figure
g__Coprococcus_ASV15003	AQP9	-0.184053	0.0214472	0.0716066	included in Figure
g__Fusobacterium_ASV15520	NFE2	0.183977	0.0215019	0.0716066	included in Figure
s__prausnitzii_ASV00156	DYSF	-0.183361	0.0219509	0.0720501	included in Figure
s__prausnitzii_ASV00156	SPON2	-0.183483	0.0218612	0.0720501	included in Figure
g__Paraprevotella_ASV02736	SPON2	-0.18355	0.0218125	0.0720501	included in Figure
g__Blautia_ASV09078	SRPX2	-0.183433	0.021898	0.0720501	included in Figure
f__Ruminococcaceae_ASV13704	SRPX2	-0.183524	0.0218314	0.0720501	included in Figure
g__Parvimonas_ASV15121	FCGR2A	-0.183319	0.0219814	0.0720501	included in Figure
g__Dorea_ASV15355	S100A8	-0.18341	0.0219144	0.0720501	included in Figure
g__Ruminococcus_ASV07554	STEAP4	-0.183254	0.0220292	0.0720735	included in Figure
f__Lachnospiraceae_ASV08984	HK3	-0.183151	0.0221054	0.0721891	included in Figure
f__Lachnospiraceae_ASV14891	SLC26A2	0.182897	0.0222938	0.0725612	included in Figure
g__Coprococcus_ASV15003	SRPX2	-0.182832	0.0223423	0.0725612	included in Figure
g__Parvimonas_ASV15121	SLC26A2	0.182849	0.0223296	0.0725612	included in Figure
s__clostridioforme_ASV09123	HK3	-0.182764	0.0223934	0.0725691	included in Figure
f__Lachnospiraceae_ASV14891	LGR6	0.182719	0.0224267	0.0725691	included in Figure
f__Ruminococcaceae_ASV13892	LILRB3	-0.182658	0.0224726	0.0725848	included in Figure
f__Ruminococcaceae_ASV13892	SRPX2	-0.182576	0.0225339	0.0726502	included in Figure
f__Lachnospiraceae_ASV09113	LILRB3	-0.182377	0.0226838	0.0730006	included in Figure
s__onderdonkii_ASV05119	MGAM	-0.182165	0.0228452	0.0732522	included in Figure
g__Bifidobacterium_ASV11471	HK3	-0.182111	0.0228862	0.0732522	included in Figure
g__Clostridium_ASV12376	PROK2	-0.182117	0.0228817	0.0732522	included in Figure
g__Adlercreutzia_ASV10589	MCEMP1	-0.18196	0.0230013	0.073488	included in Figure
f__Ruminococcaceae_ASV00145	FADS1	-0.18188	0.0230624	0.0735504	included in Figure
s__obeum_ASV09003	BNIP3	-0.181749	0.0231628	0.0737377	included in Figure
g__Bifidobacterium_ASV11471	MCEMP1	-0.181601	0.0232769	0.0738073	included in Figure
f__Ruminococcaceae_ASV13704	SPON2	-0.181398	0.0234349	0.0738073	included in Figure
g__Oscillospira_ASV13741	MCEMP1	-0.181512	0.0233461	0.0738073	included in Figure
g__Oscillospira_ASV13741	ANXA1	-0.181479	0.0233721	0.0738073	included in Figure
s__faecis_ASV15263	SRPX2	-0.181426	0.0234132	0.0738073	included in Figure
g__Dorea_ASV15355	LGR6	0.181625	0.0232589	0.0738073	included in Figure
g__Actinomyces_ASV08375	SPON2	0.181311	0.0235027	0.0738286	included in Figure
f__Lachnospiraceae_ASV09977	S100A12	-0.181282	0.023525	0.0738286	included in Figure
g__Ruminococcus_ASV07554	SRPX2	-0.180808	0.0238974	0.0746438	included in Figure
g__Actinomyces_ASV08375	AQP9	0.18079	0.0239113	0.0746438	included in Figure
g__Coprococcus_ASV15003	FCAR	-0.18083	0.0238797	0.0746438	included in Figure
g__Anaerostipes_ASV15075	C6orf223	-0.180707	0.023977	0.0747169	included in Figure
g__Ruminococcus_ASV08122	PCK1	0.180526	0.0241208	0.0748206	included in Figure
f__Lachnospiraceae_ASV09753	SRPX2	-0.180506	0.024137	0.0748206	included in Figure
g__Blautia_ASV09918	NFE2	-0.180554	0.0240984	0.0748206	included in Figure
s__prausnitzii_ASV00156	LILRA6	-0.180371	0.0242449	0.0750237	included in Figure
o__Clostridiales_ASV08574	DYSF	-0.180169	0.024407	0.0752621	included in Figure
g__Blautia_ASV09594	SRPX2	-0.180215	0.0243697	0.0752621	included in Figure
f__.Mogibacteriaceae._ASV08647	C6orf223	-0.180006	0.0245381	0.0755097	included in Figure
f__Lachnospiraceae_ASV09977	S100A8	-0.17992	0.0246079	0.0755097	included in Figure
s__parvula_ASV13157	LILRA6	0.179806	0.0247006	0.0755097	included in Figure
g__Parvimonas_ASV15121	GLT1D1	-0.179865	0.0246528	0.0755097	included in Figure
s__faecis_ASV15263	HK3	-0.179822	0.0246878	0.0755097	included in Figure
g__Coprococcus_ASV15011	ISX	0.179723	0.0247683	0.0755861	included in Figure
s__prausnitzii_ASV00156	ANXA1	-0.179537	0.02492	0.0757875	included in Figure
g__Parvimonas_ASV15121	C6orf223	-0.179559	0.0249025	0.0757875	included in Figure
g__Bilophila_ASV05654	ACSL1	-0.179309	0.025108	0.0758725	included in Figure
f__Lachnospiraceae_ASV09113	FCGR2A	-0.17931	0.0251072	0.0758725	included in Figure
f__Lachnospiraceae_ASV09977	NFE2	-0.179419	0.0250167	0.0758725	included in Figure
s__parvula_ASV13157	SLC11A1	0.179295	0.0251194	0.0758725	included in Figure
g__Mogibacterium_ASV08676	NFE2	0.179191	0.0252054	0.0760027	included in Figure
s__parainfluenzae_ASV06380	FCGR2A	0.179113	0.0252696	0.0760241	included in Figure
g__Bifidobacterium_ASV11471	S100A12	-0.179079	0.0252984	0.0760241	included in Figure
g__Fusobacterium_ASV15522	SPON2	0.178834	0.0255021	0.0765062	included in Figure
g__Coprococcus_ASV15003	CAPN13	0.178772	0.0255537	0.0765313	included in Figure
g__Blautia_ASV09918	AQP9	-0.178689	0.0256239	0.0765991	included in Figure
g__Coprococcus_ASV15011	PCK1	0.178642	0.0256629	0.0765991	included in Figure
g__Campylobacter_ASV05934	MMP1	0.178375	0.025888	0.0771409	included in Figure
g__Blautia_ASV09594	DYSF	-0.178224	0.0260161	0.0772626	included in Figure
g__Blautia_ASV09918	LGR6	0.178227	0.026014	0.0772626	included in Figure
g__Oscillospira_ASV12634	SRPX2	-0.178002	0.0262055	0.0776947	included in Figure
f__Lachnospiraceae_ASV14891	BNIP3	-0.177941	0.0262582	0.0777206	included in Figure
f__Lachnospiraceae_ASV10079	PCK1	0.177842	0.0263431	0.077842	included in Figure
g__Coprococcus_ASV15011	DYSF	-0.177682	0.0264808	0.0779882	included in Figure
g__Roseburia_ASV15174	FCGR2A	-0.177723	0.0264456	0.0779882	included in Figure
g__Actinomyces_ASV08375	MGAM	0.177466	0.0266676	0.0781484	included in Figure
f__.Mogibacteriaceae._ASV08647	LILRB3	-0.177499	0.0266392	0.0781484	included in Figure
g__Clostridium_ASV12376	FCAR	-0.177503	0.0266359	0.0781484	included in Figure
g__Ruminococcus_ASV07554	FCGR2A	-0.177389	0.0267347	0.0782155	included in Figure
s__parainfluenzae_ASV06380	PCK1	-0.176862	0.0271965	0.0785318	included in Figure
f__Lachnospiraceae_ASV08865	ACSL1	-0.177025	0.0270528	0.0785318	included in Figure
f__Lachnospiraceae_ASV08865	LILRA6	-0.177111	0.0269779	0.0785318	included in Figure
g__Blautia_ASV09078	S100A8	-0.176858	0.0272004	0.0785318	included in Figure
f__Lachnospiraceae_ASV09113	ISX	0.176971	0.0271005	0.0785318	included in Figure
g__Bifidobacterium_ASV11471	SLC26A2	0.176867	0.0271921	0.0785318	included in Figure
g__Bifidobacterium_ASV11471	FADS1	-0.177052	0.0270291	0.0785318	included in Figure
f__Ruminococcaceae_ASV13892	FADS1	-0.176811	0.0272421	0.0785318	included in Figure
g__Anaerostipes_ASV15075	AQP9	-0.177198	0.026901	0.0785318	included in Figure
s__uniformis_ASV03984	PCK1	0.176225	0.0277643	0.07877	included in Figure
g__Campylobacter_ASV05934	MGAM	0.176354	0.0276487	0.07877	included in Figure
g__Ruminococcus_ASV07554	DYSF	-0.176266	0.0277279	0.07877	included in Figure
f__.Mogibacteriaceae._ASV08647	SLC26A2	0.17649	0.0275268	0.07877	included in Figure
f__Lachnospiraceae_ASV08984	FCAR	-0.176422	0.0275879	0.07877	included in Figure
f__Lachnospiraceae_ASV09753	MGAM	-0.176574	0.0274525	0.07877	included in Figure
g__Coprococcus_ASV15003	DYSF	-0.176219	0.0277698	0.07877	included in Figure
s__faecis_ASV15263	LILRA6	-0.176375	0.02763	0.07877	included in Figure
g__Dorea_ASV15355	CAPN13	0.176446	0.0275662	0.07877	included in Figure
g__Fusobacterium_ASV15520	AQP9	0.17625	0.027742	0.07877	included in Figure
s__parainfluenzae_ASV06380	S100A8	0.176025	0.027945	0.0788504	included in Figure
f__Lachnospiraceae_ASV09113	AQP9	-0.17599	0.0279763	0.0788504	included in Figure
g__Adlercreutzia_ASV10588	S100A12	-0.176047	0.0279248	0.0788504	included in Figure
g__Anaerostipes_ASV15075	FCGR2A	-0.176133	0.0278471	0.0788504	included in Figure
f__Lachnospiraceae_ASV08865	FCGR2A	-0.175837	0.0281149	0.0789895	included in Figure
g__Blautia_ASV09594	ACSL1	-0.175848	0.028105	0.0789895	included in Figure
f__Lachnospiraceae_ASV08984	ANXA1	-0.175784	0.0281633	0.0790002	included in Figure
g__Streptococcus_ASV12252	CAPN13	-0.175528	0.0283974	0.0795308	included in Figure
g__Ruminococcus_ASV08122	S100A12	-0.175379	0.0285339	0.0795354	included in Figure
g__Adlercreutzia_ASV10589	HK3	-0.175429	0.0284877	0.0795354	included in Figure
g__Dorea_ASV15355	SRPX2	-0.175392	0.0285223	0.0795354	included in Figure
o__Clostridiales_ASV08574	SLC26A2	0.175194	0.0287048	0.0797605	included in Figure
g__Coprococcus_ASV10209	SLC26A2	0.175209	0.0286902	0.0797605	included in Figure
s__prausnitzii_ASV00156	HK3	-0.175013	0.0288723	0.079935	included in Figure
f__.Mogibacteriaceae._ASV08647	GLT1D1	-0.174998	0.0288859	0.079935	included in Figure
g__Oscillospira_ASV12634	PROK2	-0.17498	0.028903	0.079935	included in Figure
s__prausnitzii_ASV00156	PROK2	-0.174639	0.0292215	0.0802604	included in Figure
f__Lachnospiraceae_ASV08984	SPON2	-0.174734	0.0291322	0.0802604	included in Figure
s__obeum_ASV09003	C6orf223	-0.174612	0.0292474	0.0802604	included in Figure
g__Blautia_ASV09078	S100A12	-0.174619	0.0292409	0.0802604	included in Figure
g__Clostridium_ASV12376	ANXA1	-0.17471	0.0291553	0.0802604	included in Figure
g__Roseburia_ASV15174	MCEMP1	-0.174449	0.0294007	0.080556	included in Figure
f__Lachnospiraceae_ASV10079	DYSF	-0.174213	0.0296241	0.0810428	included in Figure
f__Lachnospiraceae_ASV09523	PRSS1	-0.173996	0.0298309	0.0814825	included in Figure
s__uniformis_ASV03984	SLC26A2	0.173643	0.0301702	0.0822609	included in Figure
g__Roseburia_ASV15174	SLC26A2	0.173571	0.0302396	0.0822609	included in Figure
g__Fusobacterium_ASV15520	FCAR	0.173555	0.0302553	0.0822609	included in Figure
g__Fusobacterium_ASV15522	MGAM	0.173492	0.0303156	0.0822984	included in Figure
g__Campylobacter_ASV05934	ISX	-0.173223	0.0305778	0.0827565	included in Figure
f__Lachnospiraceae_ASV09170	LILRB3	-0.173258	0.0305431	0.0827565	included in Figure
s__producta_ASV08960	S100A12	-0.173073	0.0307237	0.0828978	included in Figure
f__Lachnospiraceae_ASV09523	BNIP3	-0.173085	0.0307127	0.0828978	included in Figure
f__Lachnospiraceae_ASV09977	PROK2	-0.172985	0.0308102	0.0830047	included in Figure
g__Clostridium_ASV12376	MGAM	-0.172882	0.0309115	0.0831509	included in Figure
f__Lachnospiraceae_ASV10079	MCEMP1	-0.172713	0.0310786	0.0834737	included in Figure
g__Bifidobacterium_ASV11471	STEAP4	-0.172495	0.0312945	0.0839261	included in Figure
f__Ruminococcaceae_ASV13704	FADS1	-0.172252	0.0315372	0.0844492	included in Figure
g__Enterococcus_ASV13969	ACSL1	0.172167	0.0316224	0.0845494	included in Figure
s__parvula_ASV13157	GLT1D1	0.171979	0.031812	0.0849279	included in Figure
g__Anaerostipes_ASV15075	ANXA1	-0.171675	0.0321208	0.0856231	included in Figure
g__Megasphaera_ASV13393	PRSS1	0.171584	0.0322132	0.0857405	included in Figure
g__Blautia_ASV09078	FADS1	-0.171413	0.0323883	0.085948	included in Figure
f__Lachnospiraceae_ASV09113	LILRA6	-0.171418	0.0323829	0.085948	included in Figure
f__Lachnospiraceae_ASV08984	CAPN13	0.171233	0.0325732	0.0860349	included in Figure
f__Lachnospiraceae_ASV09523	S100A12	-0.171249	0.032556	0.0860349	included in Figure
f__Lachnospiraceae_ASV09753	MCEMP1	-0.171175	0.0326322	0.0860349	included in Figure
g__Coprococcus_ASV10209	S100A12	-0.171289	0.0325147	0.0860349	included in Figure
f__Lachnospiraceae_ASV14891	SPON2	-0.171097	0.0327127	0.0860349	included in Figure
g__Dorea_ASV15355	ACSL1	-0.171135	0.0326734	0.0860349	included in Figure
g__Roseburia_ASV15174	FADS1	-0.171015	0.0327977	0.0861304	included in Figure
s__parvula_ASV13157	ANXA1	0.170797	0.0330242	0.0865967	included in Figure
g__Campylobacter_ASV05934	SRPX2	0.170726	0.0330987	0.0866637	included in Figure
s__onderdonkii_ASV05119	SLC11A1	-0.170584	0.033247	0.0868187	included in Figure
g__Streptococcus_ASV12252	FADS1	0.170575	0.033256	0.0868187	included in Figure
g__Blautia_ASV09078	LILRB3	-0.170436	0.0334019	0.0870714	included in Figure
s__clostridioforme_ASV09123	DYSF	-0.17016	0.0336938	0.087703	included in Figure
g__Paraprevotella_ASV02736	BNIP3	-0.169959	0.0339076	0.0878719	included in Figure
g__Ruminococcus_ASV07554	FCAR	-0.169996	0.0338677	0.0878719	included in Figure
f__Lachnospiraceae_ASV09113	GLT1D1	-0.170038	0.0338236	0.0878719	included in Figure
g__Enterococcus_ASV13969	LGR6	-0.169646	0.0342421	0.0886089	included in Figure
s__parainfluenzae_ASV06380	MGAM	0.16955	0.0343451	0.0886492	included in Figure
g__Ruminococcus_ASV07554	MGAM	-0.169539	0.0343578	0.0886492	included in Figure
g__Roseburia_ASV15174	ISX	0.169341	0.034571	0.0890694	included in Figure
g__Coprococcus_ASV10209	LGR6	0.169246	0.0346746	0.089156	included in Figure
f__Ruminococcaceae_ASV13704	S100A8	-0.169199	0.0347256	0.089156	included in Figure
s__faecis_ASV15263	NFE2	-0.169171	0.0347557	0.089156	included in Figure
g__Blautia_ASV09078	PCK1	0.168854	0.035102	0.0899139	included in Figure
g__Oscillospira_ASV13741	SPON2	-0.168765	0.0351993	0.0900329	included in Figure
s__clostridioforme_ASV09123	ANXA1	-0.168529	0.0354605	0.0903763	included in Figure
g__Oscillospira_ASV12634	ANXA1	-0.168507	0.0354844	0.0903763	included in Figure
g__Parvimonas_ASV15121	ANXA1	-0.168505	0.0354868	0.0903763	included in Figure
g__Enterococcus_ASV13969	ANXA1	0.168444	0.0355545	0.0904189	included in Figure
s__producta_ASV08960	MMP1	-0.168059	0.0359829	0.0912738	included in Figure
g__Oscillospira_ASV12634	MMP1	-0.16805	0.0359938	0.0912738	included in Figure
s__prausnitzii_ASV00156	MGAM	-0.167737	0.0363459	0.0920347	included in Figure
g__Enterococcus_ASV13969	SPON2	0.167558	0.0365487	0.0923661	included in Figure
g__Parvimonas_ASV15121	ISX	0.167529	0.0365812	0.0923661	included in Figure
g__Ruminococcus_ASV07554	S100A12	-0.167398	0.0367302	0.0924787	included in Figure
g__Dorea_ASV15355	PRSS1	-0.167417	0.0367085	0.0924787	included in Figure
s__prausnitzii_ASV00156	NFE2	-0.166953	0.0372407	0.0929704	included in Figure
s__uniformis_ASV03984	BNIP3	-0.166991	0.0371973	0.0929704	included in Figure
g__Blautia_ASV09078	FCGR2A	-0.166981	0.0372079	0.0929704	included in Figure
f__Coriobacteriaceae_ASV10586	CAPN13	0.167001	0.037185	0.0929704	included in Figure
g__Coprococcus_ASV15003	MGAM	-0.167131	0.0370354	0.0929704	included in Figure
s__faecis_ASV15263	S100A8	-0.166983	0.0372065	0.0929704	included in Figure
o__Clostridiales_ASV08574	ANXA1	-0.166863	0.037345	0.0929749	included in Figure
f__Ruminococcaceae_ASV13892	STEAP4	-0.16686	0.0373475	0.0929749	included in Figure
g__Adlercreutzia_ASV10589	NFE2	-0.166773	0.0374491	0.0930968	included in Figure
f__Coriobacteriaceae_ASV10586	SLC26A2	0.166626	0.0376198	0.0933899	included in Figure
g__Campylobacter_ASV05934	FCAR	0.166495	0.0377723	0.0935062	included in Figure
g__Coprococcus_ASV15003	SLC11A1	-0.166521	0.0377418	0.0935062	included in Figure
s__onderdonkii_ASV05119	LILRA6	-0.166377	0.03791	0.0937162	included in Figure
g__Blautia_ASV09918	PROK2	-0.166229	0.038084	0.0939498	included in Figure
g__Dorea_ASV15355	FCGR2A	-0.166206	0.0381107	0.0939498	included in Figure
g__Anaerostipes_ASV15075	SLC11A1	-0.166093	0.0382439	0.0941471	included in Figure
g__Campylobacter_ASV05934	HK3	0.165884	0.0384913	0.0946243	included in Figure
g__Actinomyces_ASV08375	FCAR	0.165818	0.0385691	0.0946842	included in Figure
f__Lachnospiraceae_ASV09753	SPON2	-0.165678	0.0387357	0.0949615	included in Figure
g__Fusobacterium_ASV15520	MCEMP1	0.165474	0.03898	0.0954282	included in Figure
s__clostridioforme_ASV09123	PCK1	0.165225	0.0392792	0.0955003	included in Figure
f__Lachnospiraceae_ASV09753	S100A8	-0.165366	0.0391094	0.0955003	included in Figure
g__Blautia_ASV09918	PRSS1	-0.165308	0.0391785	0.0955003	included in Figure
g__Fusobacterium_ASV15522	BNIP3	0.165247	0.0392522	0.0955003	included in Figure
g__Fusobacterium_ASV15522	PCK1	-0.165304	0.0391836	0.0955003	included in Figure
g__Campylobacter_ASV05934	SLC11A1	0.165035	0.0395089	0.0956856	included in Figure
g__Oscillospira_ASV13659	FCGR2A	-0.165028	0.0395176	0.0956856	included in Figure
g__Anaerostipes_ASV15075	LILRA6	-0.165071	0.0394648	0.0956856	included in Figure
f__Lachnospiraceae_ASV08984	NFE2	-0.164867	0.039713	0.0958964	included in Figure
g__Clostridium_ASV12376	AQP9	-0.164886	0.0396893	0.0958964	included in Figure
f__Lachnospiraceae_ASV09523	S100A8	-0.164709	0.0399058	0.0960996	included in Figure
s__faecis_ASV15263	S100A12	-0.164734	0.0398755	0.0960996	included in Figure
f__Lachnospiraceae_ASV08865	MGAM	-0.164578	0.0400657	0.0962228	included in Figure
g__Coprococcus_ASV15003	FCGR2A	-0.164617	0.0400176	0.0962228	included in Figure
g__Ruminococcus_ASV08122	S100A8	-0.164525	0.0401311	0.0962493	included in Figure
g__Enterococcus_ASV13969	SLC26A2	-0.164455	0.0402168	0.0963245	included in Figure
g__Blautia_ASV09078	MCEMP1	-0.164283	0.0404296	0.0965727	included in Figure
s__faecis_ASV15263	STEAP4	-0.164293	0.0404171	0.0965727	included in Figure
s__prausnitzii_ASV00156	AQP9	-0.163894	0.0409126	0.0973324	included in Figure
g__Blautia_ASV09918	MMP1	-0.163942	0.0408521	0.0973324	included in Figure
g__Roseburia_ASV15174	ACSL1	-0.163936	0.0408594	0.0973324	included in Figure
f__.Mogibacteriaceae._ASV08647	MGAM	-0.163796	0.0410345	0.0974914	included in Figure
f__Lachnospiraceae_ASV09753	HK3	-0.163414	0.0415156	0.0984532	included in Figure
f__Lachnospiraceae_ASV09753	ANXA1	-0.163386	0.0415506	0.0984532	included in Figure
g__Bilophila_ASV05654	AQP9	-0.163031	0.0420018	0.0988607	included in Figure
g__Ruminococcus_ASV08122	DYSF	-0.163172	0.0418224	0.0988607	included in Figure
f__Lachnospiraceae_ASV08865	MCEMP1	-0.163129	0.0418766	0.0988607	included in Figure
g__Oscillospira_ASV13659	SPON2	-0.163034	0.0419978	0.0988607	included in Figure
g__Oscillospira_ASV13741	FADS1	-0.163047	0.0419806	0.0988607	included in Figure
s__onderdonkii_ASV05119	HK3	-0.162755	0.0423549	0.0992354	included in Figure
g__Ruminococcus_ASV08122	ISX	0.162761	0.0423468	0.0992354	included in Figure
f__Lachnospiraceae_ASV09113	MGAM	-0.162731	0.0423853	0.0992354	included in Figure
g__Coprococcus_ASV10209	ISX	0.162794	0.0423045	0.0992354	included in Figure
g__Blautia_ASV09594	FCGR2A	-0.162596	0.0425599	0.0995125	included in Figure
g__Blautia_ASV09078	SLC26A2	0.162372	0.0428496	0.0999887	included in Figure
g__Roseburia_ASV15174	S100A12	-0.162351	0.0428765	0.0999887	included in Figure
f__Lachnospiraceae_ASV09113	FCAR	-0.162277	0.0429732	0.100045
g__Anaerostipes_ASV15075	MGAM	-0.162246	0.0430137	0.100045
f__Ruminococcaceae_ASV13704	NFE2	-0.162172	0.0431101	0.100138
f__Ruminococcaceae_ASV13704	ANXA1	-0.162085	0.0432228	0.100268
f__Lachnospiraceae_ASV09113	BNIP3	-0.161976	0.043366	0.100468
g__Blautia_ASV09594	MCEMP1	-0.161787	0.0436147	0.100518
g__Bifidobacterium_ASV11471	LGR6	0.161871	0.0435035	0.100518
g__Coprococcus_ASV15011	BNIP3	-0.161824	0.0435654	0.100518
g__Dorea_ASV15355	NFE2	-0.161805	0.043591	0.100518
g__Anaerostipes_ASV15075	SPON2	-0.161535	0.0439475	0.101022
g__Roseburia_ASV15174	BNIP3	-0.16156	0.0439138	0.101022
g__Adlercreutzia_ASV10589	PROK2	-0.161277	0.0442905	0.101664
g__Bifidobacterium_ASV11471	MGAM	-0.161238	0.0443416	0.101664
g__Clostridium_ASV12376	NFE2	-0.161191	0.0444045	0.101676
s__dispar_ASV13143	SLC26A2	-0.161001	0.04466	0.101998
g__Fusobacterium_ASV15520	MGAM	0.161032	0.0446173	0.101998
s__onderdonkii_ASV05119	SRPX2	-0.160762	0.0449817	0.102428
f__Lachnospiraceae_ASV08865	BNIP3	-0.160689	0.0450808	0.102428
f__Lachnospiraceae_ASV09170	SPON2	-0.160792	0.0449407	0.102428
g__Blautia_ASV09918	GLT1D1	-0.160676	0.0450985	0.102428
g__Anaerostipes_ASV15075	SRPX2	-0.160647	0.0451377	0.102428
g__Holdemania_ASV14231	PCK1	0.160604	0.0451957	0.102428
g__Actinomyces_ASV08375	PROK2	0.160396	0.0454784	0.102523
f__.Mogibacteriaceae._ASV08647	LILRA6	-0.160385	0.0454935	0.102523
s__parvula_ASV13157	SRPX2	0.16036	0.045527	0.102523
g__Roseburia_ASV15174	S100A8	-0.160377	0.0455045	0.102523
s__faecis_ASV15263	PCK1	0.160421	0.0454444	0.102523
g__Adlercreutzia_ASV10589	AQP9	-0.160181	0.045772	0.102943
s__faecis_ASV15263	DYSF	-0.16007	0.0459254	0.103157
f__Lachnospiraceae_ASV14891	PCK1	0.159824	0.0462633	0.103785
f__Lachnospiraceae_ASV09977	FCAR	-0.159777	0.046329	0.1038
g__Blautia_ASV09918	FCGR2A	-0.159664	0.0464864	0.104018
g__Coprococcus_ASV10209	FCGR2A	-0.159622	0.0465435	0.104018
g__Blautia_ASV09078	AQP9	-0.159373	0.0468912	0.104663
f__Lachnospiraceae_ASV10079	LGR6	0.159274	0.0470306	0.104842
s__faecis_ASV15263	PROK2	-0.158443	0.0482069	0.107329
s__parainfluenzae_ASV06380	AQP9	0.158002	0.0488423	0.10734
g__Ruminococcus_ASV07554	S100A8	-0.158135	0.04865	0.10734
f__.Mogibacteriaceae._ASV08647	ISX	0.158153	0.0486244	0.10734
s__producta_ASV08960	FCGR2A	-0.157985	0.0488671	0.10734
g__Blautia_ASV09078	MGAM	-0.158135	0.0486496	0.10734
f__Lachnospiraceae_ASV09113	PROK2	-0.158352	0.0483379	0.10734
s__clostridioforme_ASV09123	ISX	0.158276	0.0484468	0.10734
f__Lachnospiraceae_ASV10079	SRPX2	-0.158328	0.0483725	0.10734
g__Enterococcus_ASV13969	C6orf223	0.158242	0.0484967	0.10734
g__Enterococcus_ASV13969	LILRA6	0.157977	0.0488791	0.10734
g__Dorea_ASV15355	AQP9	-0.15802	0.0488157	0.10734
g__Clostridium_ASV12376	SLC26A2	0.157916	0.0489673	0.1074
g__Ruminococcus_ASV07554	NFE2	-0.157853	0.0490584	0.107467
f__Lachnospiraceae_ASV09170	MCEMP1	-0.157789	0.0491513	0.107537
f__Lachnospiraceae_ASV10079	FCGR2A	-0.157648	0.0493571	0.107854
g__Fusobacterium_ASV15522	NFE2	0.157589	0.0494429	0.107909
g__Clostridium_ASV12376	SPON2	-0.157491	0.0495861	0.108088
f__Coriobacteriaceae_ASV10586	PCK1	0.157435	0.0496684	0.108134
f__.Mogibacteriaceae._ASV08647	SLC11A1	-0.157202	0.0500121	0.108615
g__Blautia_ASV09594	HK3	-0.15723	0.0499704	0.108615
g__Mogibacterium_ASV08676	CAPN13	-0.157096	0.0501678	0.108672
g__Parvimonas_ASV15121	MGAM	-0.15706	0.0502223	0.108672
s__faecis_ASV15263	AQP9	-0.157114	0.0501409	0.108672
s__uniformis_ASV03984	C6orf223	-0.15699	0.050326	0.108696
g__Mogibacterium_ASV08676	BNIP3	0.156969	0.0503563	0.108696
f__Lachnospiraceae_ASV09113	FADS1	-0.156792	0.0506197	0.109131
g__Enterococcus_ASV13969	SRPX2	0.156509	0.0510426	0.109909
g__Holdemania_ASV14231	FCGR2A	-0.156249	0.0514352	0.11062
f__Lachnospiraceae_ASV09113	ANXA1	-0.156043	0.0517466	0.110885
s__clostridioforme_ASV09123	NFE2	-0.156091	0.0516744	0.110885
f__Lachnospiraceae_ASV09977	MCEMP1	-0.15608	0.051691	0.110885
f__Lachnospiraceae_ASV08984	DYSF	-0.155956	0.0518786	0.111034
g__Mogibacterium_ASV08676	FADS1	0.155712	0.0522508	0.111426
g__Bifidobacterium_ASV11471	SRPX2	-0.155766	0.0521692	0.111426
g__Fusobacterium_ASV15522	SLC11A1	0.155749	0.0521952	0.111426
g__Roseburia_ASV15174	AQP9	-0.155597	0.0524279	0.11167
g__Blautia_ASV09078	PROK2	-0.155414	0.0527087	0.112133
g__Mogibacterium_ASV08676	SLC26A2	-0.155053	0.0532677	0.113186
g__Roseburia_ASV15174	FCAR	-0.154539	0.0540718	0.114757
g__Campylobacter_ASV05934	FCGR2A	0.154277	0.0544856	0.115303
s__parainfluenzae_ASV06380	PROK2	0.154253	0.0545247	0.115303
s__dispar_ASV13143	LGR6	-0.154274	0.0544917	0.115303
g__Clostridium_ASV12376	STEAP4	-0.154129	0.0547209	0.11558
f__Ruminococcaceae_ASV13704	GLT1D1	-0.154001	0.054925	0.115873
g__Holdemania_ASV14231	BNIP3	-0.153834	0.0551918	0.116297
s__parainfluenzae_ASV06380	HK3	0.153791	0.0552605	0.116303
f__Lachnospiraceae_ASV09170	NFE2	-0.153656	0.0554769	0.11662
g__Ruminococcus_ASV08122	MGAM	-0.153586	0.0555906	0.116711
f__Lachnospiraceae_ASV09170	FCAR	-0.153548	0.0556522	0.116711
f__Lachnospiraceae_ASV08984	PRSS1	-0.15336	0.0559555	0.11673
g__Blautia_ASV09078	CAPN13	0.153443	0.0558214	0.11673
s__clostridioforme_ASV09123	STEAP4	-0.153338	0.055991	0.11673
g__Parvimonas_ASV15121	BNIP3	-0.153434	0.0558351	0.11673
g__Parvimonas_ASV15121	LILRB3	-0.153342	0.0559849	0.11673
g__Anaerostipes_ASV15075	STEAP4	-0.153279	0.0560873	0.116793
g__Fusobacterium_ASV15520	GLT1D1	0.153207	0.056204	0.116899
g__Bilophila_ASV05654	MGAM	-0.153058	0.0564467	0.117071
f__Lachnospiraceae_ASV08984	PCK1	0.153034	0.0564853	0.117071
g__Oscillospira_ASV13659	PCK1	0.153063	0.056438	0.117071
g__Clostridium_ASV12376	GLT1D1	-0.152949	0.0566241	0.117085
s__parvula_ASV13157	MMP1	0.152962	0.0566037	0.117085
g__Blautia_ASV09594	STEAP4	-0.152882	0.0567338	0.117175
g__Dorea_ASV15355	PROK2	-0.152812	0.0568487	0.117275
s__faecis_ASV15263	SLC26A2	0.152661	0.0570967	0.11765
f__Coriobacteriaceae_ASV10586	ACSL1	-0.152577	0.0572361	0.1178
g__Paraprevotella_ASV02736	STEAP4	-0.152492	0.0573754	0.117813
g__Ruminococcus_ASV08122	LILRA6	-0.152499	0.0573646	0.117813
g__Fusobacterium_ASV15520	SLC11A1	0.152288	0.0577136	0.11837
g__Ruminococcus_ASV07554	AQP9	-0.152065	0.0580851	0.118719
o__Clostridiales_ASV08574	ISX	0.152141	0.0579592	0.118719
f__Lachnospiraceae_ASV08865	PRSS1	-0.152104	0.0580196	0.118719
g__Bilophila_ASV05654	FCAR	-0.151976	0.0582337	0.118775
f__Ruminococcaceae_ASV07190	SLC26A2	0.151892	0.0583753	0.118775
s__clostridioforme_ASV09123	MCEMP1	-0.151818	0.0584988	0.118775
s__clostridioforme_ASV09123	S100A12	-0.151809	0.0585149	0.118775
f__Lachnospiraceae_ASV09977	MGAM	-0.151816	0.0585018	0.118775
g__Fusobacterium_ASV15522	S100A12	0.151857	0.0584338	0.118775
g__Blautia_ASV09594	LILRB3	-0.151684	0.0587242	0.118927
g__Adlercreutzia_ASV10588	S100A8	-0.151711	0.0586787	0.118927
g__Campylobacter_ASV05934	PRSS1	0.151313	0.0593526	0.119799
o__Clostridiales_ASV08574	LILRB3	-0.151327	0.0593288	0.119799
g__Oscillospira_ASV13741	STEAP4	-0.151284	0.0594028	0.119799
g__Fusobacterium_ASV15522	MCEMP1	0.15127	0.0594258	0.119799
s__onderdonkii_ASV05119	STEAP4	-0.151122	0.0596785	0.120035
g__Anaerostipes_ASV15075	FCAR	-0.151146	0.0596375	0.120035
g__Oscillospira_ASV12634	AQP9	-0.151034	0.0598287	0.120145
g__Roseburia_ASV15174	SRPX2	-0.15101	0.059869	0.120145
g__Campylobacter_ASV05934	LGR6	-0.150733	0.0603451	0.120618
f__Lachnospiraceae_ASV09977	ISX	0.150668	0.0604586	0.120618
g__Coprococcus_ASV10209	S100A8	-0.150636	0.0605133	0.120618
g__Holdemania_ASV14231	ACSL1	-0.15074	0.0603342	0.120618
g__Holdemania_ASV14231	HK3	-0.150688	0.0604228	0.120618
g__Fusobacterium_ASV15522	PRSS1	0.150746	0.0603235	0.120618
f__Lachnospiraceae_ASV10079	STEAP4	-0.150465	0.0608096	0.121072
o__Clostridiales_ASV08574	BNIP3	-0.150318	0.0610644	0.121198
g__Adlercreutzia_ASV10589	LILRA6	-0.150253	0.0611776	0.121198
g__Oscillospira_ASV12634	BNIP3	-0.150298	0.061099	0.121198
f__Ruminococcaceae_ASV13704	MMP1	-0.150231	0.0612152	0.121198
g__Coprococcus_ASV15011	CAPN13	0.150341	0.0610252	0.121198
g__Ruminococcus_ASV08122	NFE2	-0.150117	0.0614151	0.121272
f__Lachnospiraceae_ASV08865	ANXA1	-0.15016	0.0613406	0.121272
f__Ruminococcaceae_ASV13704	FCAR	-0.150092	0.0614584	0.121272
f__Lachnospiraceae_ASV08984	SRPX2	-0.149786	0.061996	0.12179
f__Lachnospiraceae_ASV08984	SLC26A2	0.149796	0.0619779	0.12179
g__Adlercreutzia_ASV10588	MCEMP1	-0.149865	0.0618566	0.12179
g__Roseburia_ASV15174	PROK2	-0.149829	0.0619207	0.12179
g__Fusobacterium_ASV15522	LILRA6	0.149615	0.0622984	0.122248
g__Adlercreutzia_ASV10589	MGAM	-0.149516	0.0624725	0.122319
s__dispar_ASV13143	C6orf223	0.149536	0.0624375	0.122319
g__Adlercreutzia_ASV10588	MMP1	-0.149388	0.0627008	0.12263
g__Dorea_ASV15355	SLC11A1	-0.149343	0.0627806	0.122651
s__prausnitzii_ASV00156	SLC11A1	-0.149209	0.0630191	0.122981
g__Holdemania_ASV14231	DYSF	-0.149076	0.0632578	0.123311
g__Bifidobacterium_ASV11471	SLC11A1	-0.148956	0.0634722	0.12349
f__Ruminococcaceae_ASV13704	BNIP3	-0.148947	0.0634893	0.12349
g__Actinomyces_ASV08375	CAPN13	-0.148824	0.0637112	0.123786
g__Bilophila_ASV05654	MCEMP1	-0.148384	0.0645076	0.124451
g__Campylobacter_ASV05934	C6orf223	0.148438	0.0644096	0.124451
s__producta_ASV08960	NFE2	-0.148512	0.0642741	0.124451
f__Lachnospiraceae_ASV09523	NFE2	-0.148508	0.0642811	0.124451
g__Blautia_ASV09594	S100A12	-0.14847	0.0643509	0.124451
f__Coriobacteriaceae_ASV10586	ISX	0.148469	0.0643522	0.124451
f__Lachnospiraceae_ASV14891	MCEMP1	-0.148363	0.0645456	0.124451
f__Lachnospiraceae_ASV09523	ANXA1	-0.148267	0.0647209	0.124653
s__prausnitzii_ASV00156	LILRB3	-0.148151	0.0649326	0.124925
g__Paraprevotella_ASV02736	FCAR	-0.147952	0.0652966	0.125489
g__Campylobacter_ASV05934	CAPN13	-0.147743	0.0656828	0.126094
g__Oscillospira_ASV13659	ACSL1	-0.147484	0.0661635	0.126879
g__Coprococcus_ASV15003	LILRA6	-0.147141	0.066802	0.127965
s__clostridioforme_ASV09123	FCGR2A	-0.146864	0.0673229	0.128564
g__Clostridium_ASV12376	SRPX2	-0.146859	0.0673325	0.128564
g__Coprococcus_ASV15003	MMP1	-0.146931	0.0671964	0.128564
f__Lachnospiraceae_ASV09170	LILRA6	-0.14653	0.0679554	0.129537
g__Adlercreutzia_ASV10588	SPON2	-0.146512	0.0679888	0.129537
f__Ruminococcaceae_ASV07190	SPON2	-0.14621	0.0685655	0.13013
o__Clostridiales_ASV08574	FCAR	-0.146282	0.0684281	0.13013
g__Blautia_ASV09078	LGR6	0.146195	0.0685938	0.13013
g__Blautia_ASV09594	MGAM	-0.146251	0.0684864	0.13013
f__Lachnospiraceae_ASV09753	PROK2	-0.146092	0.0687907	0.130364
f__Lachnospiraceae_ASV14891	S100A12	-0.145931	0.0691004	0.13081
f__Lachnospiraceae_ASV09977	MMP1	-0.145749	0.0694512	0.131334
g__Oscillospira_ASV13741	S100A12	-0.145673	0.0695977	0.131471
g__Paraprevotella_ASV02736	DYSF	-0.14559	0.0697593	0.131515
g__Ruminococcus_ASV07554	SLC11A1	-0.145546	0.0698443	0.131515
g__Mogibacterium_ASV08676	C6orf223	0.145575	0.0697878	0.131515
g__Bilophila_ASV05654	STEAP4	-0.145366	0.0701951	0.131539
f__Lachnospiraceae_ASV09113	C6orf223	-0.145388	0.0701528	0.131539
g__Blautia_ASV09594	PCK1	0.145474	0.0699849	0.131539
f__Coriobacteriaceae_ASV10586	BNIP3	-0.145354	0.0702186	0.131539
g__Roseburia_ASV15174	MGAM	-0.145349	0.0702283	0.131539
g__Bifidobacterium_ASV11471	CAPN13	0.145296	0.0703313	0.131592
g__Blautia_ASV09078	NFE2	-0.145193	0.0705328	0.131713
f__Lachnospiraceae_ASV09753	ACSL1	-0.145187	0.0705447	0.131713
g__Adlercreutzia_ASV10588	PCK1	0.144936	0.0710373	0.132493
.f__.Mogibacteriaceae._ASV08690	LGR6	0.144815	0.071276	0.132613
f__Lachnospiraceae_ASV09113	SLC11A1	-0.144714	0.071476	0.132613
g__Blautia_ASV09918	ACSL1	-0.144769	0.0713681	0.132613
g__Oscillospira_ASV12634	NFE2	-0.144682	0.0715401	0.132613
g__Oscillospira_ASV13741	ISX	0.144627	0.0716477	0.132613
g__Coprococcus_ASV15011	FCGR2A	-0.144638	0.0716268	0.132613
g__Anaerostipes_ASV15075	NFE2	-0.1446	0.0717012	0.132613
g__Roseburia_ASV15174	C6orf223	-0.144852	0.0712037	0.132613
o__Clostridiales_ASV08574	PRSS1	-0.144553	0.0717957	0.13265
s__clostridioforme_ASV09123	S100A8	-0.144491	0.0719195	0.13274
s__clostridioforme_ASV09123	LILRB3	-0.144443	0.0720146	0.132777
g__Ruminococcus_ASV08122	FCAR	-0.144309	0.0722811	0.13313
s__prausnitzii_ASV00156	STEAP4	-0.144262	0.0723759	0.133166
g__Oscillospira_ASV12634	MGAM	-0.144133	0.0726335	0.133501
g__Parvimonas_ASV15121	FADS1	-0.143883	0.0731352	0.134283
o__Clostridiales_ASV15397	PRSS1	-0.143695	0.073515	0.134841
s__parainfluenzae_ASV06380	SLC26A2	-0.143365	0.074186	0.134944
s__parainfluenzae_ASV06380	NFE2	0.143485	0.0739413	0.134944
g__Blautia_ASV09078	PRSS1	-0.143404	0.0741077	0.134944
s__clostridioforme_ASV09123	SRPX2	-0.143589	0.0737309	0.134944
f__Lachnospiraceae_ASV09977	LILRB3	-0.143331	0.0742554	0.134944
g__Adlercreutzia_ASV10589	ANXA1	-0.143372	0.0741722	0.134944
g__Bifidobacterium_ASV11471	FCAR	-0.14333	0.0742573	0.134944
g__Oscillospira_ASV13741	MGAM	-0.143455	0.0740036	0.134944
g__Fusobacterium_ASV15520	ACSL1	0.143544	0.0738218	0.134944
g__Fusobacterium_ASV15520	C6orf223	0.143154	0.0746176	0.13546
s__parvula_ASV13157	BNIP3	0.1431	0.0747288	0.135523
f__Coriobacteriaceae_ASV10586	FCGR2A	-0.142782	0.0753836	0.13657
f__Lachnospiraceae_ASV09170	PROK2	-0.142542	0.0758797	0.136769
f__Lachnospiraceae_ASV09753	FCAR	-0.142571	0.0758202	0.136769
g__Oscillospira_ASV13659	MCEMP1	-0.142604	0.0757522	0.136769
g__Coprococcus_ASV15003	HK3	-0.14257	0.0758231	0.136769
g__Anaerostipes_ASV15075	GLT1D1	-0.142689	0.0755761	0.136769
s__onderdonkii_ASV05119	PCK1	0.142456	0.0760597	0.136818
g__Ruminococcus_ASV08122	AQP9	-0.142455	0.0760617	0.136818
s__clostridioforme_ASV09123	CAPN13	0.14204	0.0769278	0.138067
g__Blautia_ASV09594	S100A8	-0.142077	0.076852	0.138067
g__Enterococcus_ASV13969	FCGR2A	0.142011	0.0769901	0.138067
s__faecis_ASV15263	ISX	0.141937	0.0771457	0.138206
s__prausnitzii_ASV00156	MMP1	-0.141563	0.0779363	0.138457
s__onderdonkii_ASV05119	SPON2	-0.141668	0.0777143	0.138457
g__Ruminococcus_ASV07554	ISX	0.141727	0.0775888	0.138457
s__clostridioforme_ASV09123	FADS1	-0.141588	0.0778827	0.138457
f__Lachnospiraceae_ASV09977	LILRA6	-0.141661	0.0777285	0.138457
g__Adlercreutzia_ASV10588	PRSS1	-0.141688	0.0776703	0.138457
g__Holdemania_ASV14231	LILRA6	-0.141583	0.0778935	0.138457
g__Roseburia_ASV15174	SLC11A1	-0.141538	0.0779898	0.138457
g__Fusobacterium_ASV15520	DYSF	0.141547	0.0779706	0.138457
s__clostridioforme_ASV09123	SPON2	-0.141416	0.0782484	0.138777
g__Paraprevotella_ASV02736	MCEMP1	-0.141302	0.078492	0.138853
f__Lachnospiraceae_ASV14891	PRSS1	-0.141249	0.078605	0.138853
s__faecis_ASV15263	FCAR	-0.141346	0.0783979	0.138853
g__Fusobacterium_ASV15522	S100A8	0.141262	0.0785778	0.138853
g__Bilophila_ASV05654	FCGR2A	-0.140893	0.0793678	0.13974
f__Coriobacteriaceae_ASV10586	S100A12	-0.140879	0.0793982	0.13974
g__Oscillospira_ASV12634	FCAR	-0.140878	0.0794013	0.13974
f__Lachnospiraceae_ASV14891	ISX	0.140868	0.0794226	0.13974
g__Blautia_ASV09078	LILRA6	-0.140686	0.079816	0.140292
f__Coriobacteriaceae_ASV10586	NFE2	-0.140512	0.080193	0.140815
f__Lachnospiraceae_ASV09523	PROK2	-0.140387	0.0804643	0.140957
g__Oscillospira_ASV13741	FCAR	-0.140365	0.0805125	0.140957
f__Lachnospiraceae_ASV14891	MMP1	-0.140423	0.0803864	0.140957
s__producta_ASV08960	SLC11A1	-0.139869	0.0815979	0.142076
s__clostridioforme_ASV09123	LILRA6	-0.140005	0.0813004	0.142076
f__Lachnospiraceae_ASV10079	ISX	0.139983	0.0813471	0.142076
s__parvula_ASV13157	PCK1	-0.139904	0.0815225	0.142076
g__Coprococcus_ASV15011	SLC26A2	0.139869	0.0815977	0.142076
g__Coprococcus_ASV15011	STEAP4	-0.139853	0.0816336	0.142076
g__Actinomyces_ASV08375	HK3	0.139643	0.0820983	0.14225
s__producta_ASV08960	S100A8	-0.139717	0.081933	0.14225
f__Lachnospiraceae_ASV08984	ISX	0.13962	0.0821483	0.14225
f__Lachnospiraceae_ASV09977	SPON2	-0.139696	0.0819813	0.14225
f__Lachnospiraceae_ASV10079	S100A12	-0.139737	0.0818909	0.14225
g__Coprococcus_ASV15003	GLT1D1	-0.13959	0.0822159	0.14225
g__Clostridium_ASV12376	HK3	-0.139164	0.0831625	0.143748
f__Lachnospiraceae_ASV09753	FADS1	-0.139054	0.0834101	0.144035
o__Clostridiales_ASV08574	CAPN13	0.138928	0.0836915	0.14438
s__dispar_ASV13143	PCK1	-0.138862	0.0838408	0.144497
g__Paraprevotella_ASV02736	ACSL1	-0.138773	0.0840405	0.1447
s__clostridioforme_ASV09123	ACSL1	-0.138558	0.0845268	0.145222
f__Lachnospiraceae_ASV09523	LILRA6	-0.13853	0.0845898	0.145222
g__Fusobacterium_ASV15522	DYSF	0.138558	0.0845275	0.145222
g__Oscillospira_ASV13741	CAPN13	0.138414	0.0848536	0.145534
f__Lachnospiraceae_ASV09753	PRSS1	-0.138299	0.0851159	0.145842
s__clostridioforme_ASV09123	LGR6	0.138179	0.0853892	0.146169
s__faecis_ASV15263	FADS1	-0.138122	0.0855185	0.146249
f__Lachnospiraceae_ASV09113	CAPN13	0.137951	0.0859123	0.146781
f__Lachnospiraceae_ASV09523	MCEMP1	-0.137886	0.0860604	0.146892
s__obeum_ASV09003	SPON2	-0.137663	0.0865745	0.14743
g__Bifidobacterium_ASV11471	FCGR2A	-0.13771	0.0864651	0.14743
f__Ruminococcaceae_ASV13892	LILRA6	-0.137641	0.0866253	0.14743
g__Bilophila_ASV05654	S100A12	-0.137585	0.0867558	0.14751
g__Dorea_ASV15355	STEAP4	-0.137504	0.0869428	0.147686
g__Fusobacterium_ASV15522	MMP1	0.13741	0.0871609	0.147914
o__Clostridiales_ASV15397	MCEMP1	-0.137287	0.0874471	0.148116
g__Fusobacterium_ASV15522	FCGR2A	0.137287	0.0874457	0.148116
g__Fusobacterium_ASV15520	HK3	0.137231	0.0875764	0.148193
s__parainfluenzae_ASV06380	FCAR	0.137039	0.0880241	0.148383
o__Clostridiales_ASV08574	FCGR2A	-0.137067	0.0879605	0.148383
s__clostridioforme_ASV09123	PROK2	-0.137045	0.0880113	0.148383
f__Lachnospiraceae_ASV09170	S100A12	-0.137062	0.0879705	0.148383
s__faecis_ASV15263	SLC11A1	-0.136912	0.0883233	0.148746
g__Bilophila_ASV05654	LILRB3	-0.136629	0.0889889	0.14876
g__Actinomyces_ASV08375	LILRA6	0.136718	0.08878	0.14876
f__Lachnospiraceae_ASV08984	LILRA6	-0.136623	0.0890041	0.14876
f__Lachnospiraceae_ASV09170	S100A8	-0.136745	0.0887157	0.14876
g__Blautia_ASV09918	SLC11A1	-0.136844	0.0884833	0.14876
f__Lachnospiraceae_ASV09977	SLC11A1	-0.136746	0.088713	0.14876
g__Adlercreutzia_ASV10589	FCAR	-0.136657	0.0889235	0.14876
o__Clostridiales_ASV15397	HK3	-0.136795	0.0885985	0.14876
f__Lachnospiraceae_ASV09170	AQP9	-0.136278	0.0898215	0.149985
f__Lachnospiraceae_ASV08984	LILRB3	-0.136232	0.0899311	0.150026
g__Ruminococcus_ASV08122	PROK2	-0.136178	0.0900587	0.150098
f__Ruminococcaceae_ASV00145	ISX	0.136014	0.090449	0.15022
f__Lachnospiraceae_ASV09170	ACSL1	-0.135983	0.0905249	0.15022
f__Lachnospiraceae_ASV09523	AQP9	-0.135953	0.0905953	0.15022
g__Blautia_ASV09918	FCAR	-0.136097	0.090251	0.15022
g__Coprococcus_ASV15011	PROK2	-0.135934	0.0906409	0.15022
g__Parvimonas_ASV15121	ACSL1	-0.136028	0.0904175	0.15022
g__Coprococcus_ASV10209	MCEMP1	-0.135704	0.0911937	0.150881
g__Roseburia_ASV15174	LILRB3	-0.135697	0.0912106	0.150881
f__Lachnospiraceae_ASV08865	AQP9	-0.135634	0.0913614	0.150927
g__Oscillospira_ASV12634	SLC11A1	-0.135615	0.0914091	0.150927
f__Lachnospiraceae_ASV09753	FCGR2A	-0.135521	0.0916359	0.151161
.f__.Mogibacteriaceae._ASV08690	SLC26A2	0.135413	0.091896	0.151308
f__Lachnospiraceae_ASV09170	FCGR2A	-0.135429	0.091857	0.151308
g__Coprococcus_ASV15011	MMP1	-0.135187	0.0924445	0.152069
s__faecis_ASV15263	CAPN13	0.135139	0.0925626	0.152122
g__Adlercreutzia_ASV10589	SPON2	-0.135089	0.0926837	0.15218
g__Anaerostipes_ASV15075	BNIP3	-0.134915	0.0931098	0.152738
g__Roseburia_ASV15174	LILRA6	-0.134874	0.0932099	0.152761
g__Paraprevotella_ASV02736	MGAM	-0.134803	0.0933836	0.152904
g__Fusobacterium_ASV15520	BNIP3	0.134652	0.0937534	0.153367
g__Ruminococcus_ASV08122	FCGR2A	-0.134542	0.094025	0.153601
g__Ruminococcus_ASV08122	GLT1D1	-0.134489	0.0941565	0.153601
f__Lachnospiraceae_ASV08865	FCAR	-0.134505	0.094117	0.153601
g__Ruminococcus_ASV07554	LGR6	0.134303	0.0946163	0.154209
s__producta_ASV08960	MCEMP1	-0.134254	0.0947387	0.154266
f__Ruminococcaceae_ASV07190	C6orf223	-0.134203	0.094864	0.154328
g__Coprococcus_ASV10209	CAPN13	0.134133	0.0950381	0.15447
s__parvula_ASV13157	SPON2	0.134089	0.0951467	0.154504
s__clostridioforme_ASV09123	MGAM	-0.13399	0.0953956	0.154586
f__Lachnospiraceae_ASV10079	FCAR	-0.134016	0.0953295	0.154586
g__Oscillospira_ASV12634	DYSF	-0.133964	0.0954588	0.154586
g__Dorea_ASV15355	FCAR	-0.133885	0.0956576	0.154766
s__uniformis_ASV03984	SPON2	-0.133731	0.096042	0.155246
s__parainfluenzae_ASV06380	GLT1D1	0.133587	0.0964033	0.155404
s__producta_ASV08960	MGAM	-0.133599	0.0963737	0.155404
g__Clostridium_ASV12376	C6orf223	-0.133602	0.0963668	0.155404
g__Adlercreutzia_ASV10589	FCGR2A	-0.132865	0.0982351	0.158213
g__Ruminococcus_ASV07554	LILRB3	-0.13265	0.0987854	0.158916
g__Holdemania_ASV14231	SRPX2	-0.132624	0.0988512	0.158916
g__Fusobacterium_ASV15522	AQP9	0.132475	0.0992331	0.159385
g__Holdemania_ASV14231	MCEMP1	-0.132343	0.0995733	0.159762
g__Roseburia_ASV15174	PCK1	0.132279	0.0997382	0.159762
g__Fusobacterium_ASV15520	FCGR2A	0.132309	0.0996628	0.159762
f__Ruminococcaceae_ASV13704	SLC11A1	-0.132092	0.100224	0.160394
f__Lachnospiraceae_ASV08984	LGR6	0.131931	0.100643	0.16063
f__Lachnospiraceae_ASV08984	PROK2	-0.131951	0.10059	0.16063
g__Holdemania_ASV14231	FADS1	-0.131932	0.100639	0.16063
g__Bilophila_ASV05654	SRPX2	-0.131833	0.100898	0.160891
o__Clostridiales_ASV15397	C6orf223	-0.131792	0.101004	0.160915
s__parainfluenzae_ASV06380	FADS1	0.131722	0.101187	0.161016
s__parvula_ASV13157	SLC26A2	-0.131698	0.101249	0.161016
g__Bilophila_ASV05654	PROK2	-0.131492	0.101791	0.161692
g__Blautia_ASV09594	LILRA6	-0.131432	0.101948	0.161692
f__Lachnospiraceae_ASV14891	S100A8	-0.131439	0.101928	0.161692
g__Paraprevotella_ASV02736	LILRA6	-0.131302	0.10229	0.162088
g__Blautia_ASV09078	SLC11A1	-0.131259	0.102403	0.162123
f__Lachnospiraceae_ASV09753	NFE2	-0.131213	0.102524	0.16217
f__Lachnospiraceae_ASV09977	C6orf223	-0.131077	0.102885	0.162596
f__Lachnospiraceae_ASV09753	LGR6	0.130992	0.10311	0.162661
g__Dorea_ASV15355	LILRA6	-0.130992	0.10311	0.162661
f__Ruminococcaceae_ASV07190	ANXA1	-0.130908	0.103332	0.162866
f__Ruminococcaceae_ASV13704	DYSF	-0.130833	0.103532	0.163036
g__Fusobacterium_ASV15522	PROK2	0.130706	0.10387	0.163422
g__Adlercreutzia_ASV10589	LILRB3	-0.130523	0.104361	0.163946
g__Fusobacterium_ASV15522	FCAR	0.130512	0.104388	0.163946
s__producta_ASV08960	PROK2	-0.130455	0.104541	0.164041
f__Lachnospiraceae_ASV08984	STEAP4	-0.130367	0.104779	0.164123
s__clostridioforme_ASV09123	C6orf223	-0.13038	0.104744	0.164123
g__Ruminococcus_ASV07554	SLC26A2	0.130249	0.105094	0.164471
g__Roseburia_ASV15174	NFE2	-0.130215	0.105188	0.164472
s__prausnitzii_ASV00156	FADS1	-0.13004	0.105659	0.165063
s__clostridioforme_ASV09123	AQP9	-0.129743	0.106466	0.166177
g__Blautia_ASV09594	AQP9	-0.129621	0.106798	0.166549
s__parvula_ASV13157	FCAR	0.129575	0.106922	0.16657
g__Oscillospira_ASV13741	S100A8	-0.129547	0.107	0.16657
f__Ruminococcaceae_ASV00145	BNIP3	-0.129251	0.107811	0.167538
f__Lachnospiraceae_ASV09170	BNIP3	-0.12926	0.107786	0.167538
s__producta_ASV08960	ACSL1	-0.128842	0.108938	0.16914
s__producta_ASV08960	FCAR	-0.128632	0.109522	0.169898
f__Coriobacteriaceae_ASV10586	PRSS1	-0.128157	0.110849	0.171656
s__parvula_ASV13157	C6orf223	0.12816	0.11084	0.171656
s__onderdonkii_ASV05119	LGR6	0.128059	0.111125	0.171928
g__Ruminococcus_ASV08122	SLC11A1	-0.128025	0.111219	0.171928
g__Blautia_ASV09078	GLT1D1	-0.127871	0.111654	0.17245
g__Clostridium_ASV12376	ACSL1	-0.12778	0.111913	0.172699
g__Blautia_ASV09078	FCAR	-0.127584	0.112467	0.173403
g__Blautia_ASV09594	FCAR	-0.127399	0.112995	0.173872
g__Clostridium_ASV12376	DYSF	-0.127374	0.113066	0.173872
f__Ruminococcaceae_ASV13704	STEAP4	-0.127389	0.113022	0.173872
f__Lachnospiraceae_ASV09977	SLC26A2	0.127287	0.113314	0.174103
f__Lachnospiraceae_ASV09113	LGR6	0.127217	0.113514	0.174258
g__Clostridium_ASV12376	LILRB3	-0.127102	0.113842	0.17461
g__Bilophila_ASV05654	SLC11A1	-0.127051	0.113988	0.174683
s__prausnitzii_ASV00156	GLT1D1	-0.126667	0.115096	0.176228
f__Lachnospiraceae_ASV09753	LILRA6	-0.126498	0.115583	0.176692
g__Anaerostipes_ASV15075	ACSL1	-0.126493	0.115598	0.176692
s__onderdonkii_ASV05119	MMP1	-0.126318	0.116108	0.177012
g__Streptococcus_ASV12252	PRSS1	0.126354	0.116003	0.177012
g__Oscillospira_ASV13659	HK3	-0.126329	0.116075	0.177012
g__Fusobacterium_ASV15520	STEAP4	0.126278	0.116224	0.177036
o__Clostridiales_ASV08574	AQP9	-0.126076	0.116814	0.177782
g__Adlercreutzia_ASV10589	DYSF	-0.125795	0.117639	0.178884
g__Oscillospira_ASV13741	PROK2	-0.125679	0.11798	0.179249
f__Ruminococcaceae_ASV00145	CAPN13	0.125503	0.1185	0.179884
g__Dorea_ASV15355	DYSF	-0.125382	0.118857	0.180271
g__Bilophila_ASV05654	S100A8	-0.125284	0.119149	0.18056
s__onderdonkii_ASV05119	SLC26A2	0.125106	0.119678	0.181207
s__producta_ASV08960	LILRA6	-0.125026	0.119916	0.181411
o__Clostridiales_ASV15397	ISX	0.12498	0.120053	0.181463
g__Mogibacterium_ASV08676	MMP1	0.124859	0.120417	0.181859
f__Ruminococcaceae_ASV07190	ISX	0.124658	0.121019	0.182146
f__Coriobacteriaceae_ASV10586	LILRB3	-0.124752	0.120737	0.182146
g__Coprococcus_ASV15011	LILRA6	-0.124697	0.120903	0.182146
g__Fusobacterium_ASV15520	SRPX2	0.124669	0.120986	0.182146
g__Adlercreutzia_ASV10589	SLC11A1	-0.124487	0.121533	0.182765
o__Clostridiales_ASV08574	MCEMP1	-0.124347	0.121956	0.183245
g__Oscillospira_ASV13741	FCGR2A	-0.124253	0.122242	0.183518
g__Clostridium_ASV12376	LILRA6	-0.123993	0.123031	0.184511
o__Clostridiales_ASV15397	S100A12	-0.123967	0.123112	0.184511
g__Coprococcus_ASV10209	PCK1	0.123706	0.123908	0.185391
f__Lachnospiraceae_ASV14891	CAPN13	0.123724	0.123854	0.185391
g__Fusobacterium_ASV15522	FADS1	0.123584	0.124283	0.185794
g__Anaerostipes_ASV15075	PRSS1	-0.123524	0.124465	0.18591
g__Oscillospira_ASV13741	AQP9	-0.12343	0.124754	0.186184
g__Ruminococcus_ASV07554	PCK1	0.123335	0.125048	0.186466
f__.Mogibacteriaceae._ASV08647	CAPN13	0.123261	0.125277	0.18665
f__Lachnospiraceae_ASV10079	FADS1	-0.123125	0.125697	0.187118
f__Lachnospiraceae_ASV09977	HK3	-0.123023	0.126011	0.187271
s__dispar_ASV13143	ISX	-0.122989	0.126117	0.187271
g__Roseburia_ASV15174	CAPN13	0.123036	0.125973	0.187271
f__.Mogibacteriaceae._ASV08647	HK3	-0.122801	0.126702	0.187825
g__Coprococcus_ASV15003	LILRB3	-0.122829	0.126616	0.187825
g__Fusobacterium_ASV15520	SLC26A2	-0.122619	0.127272	0.188511
g__Fusobacterium_ASV15522	LGR6	-0.122302	0.128266	0.189825
.f__.Mogibacteriaceae._ASV08690	SPON2	-0.122148	0.128748	0.190264
f__Lachnospiraceae_ASV14891	STEAP4	-0.122139	0.128777	0.190264
s__producta_ASV08960	LGR6	0.122069	0.128997	0.19043
g__Fusobacterium_ASV15520	MMP1	0.121986	0.12926	0.190659
g__Coprococcus_ASV15011	MCEMP1	-0.121783	0.129903	0.191448
f__Lachnospiraceae_ASV14891	MGAM	-0.121438	0.131004	0.19291
g__Enterococcus_ASV13969	HK3	0.121387	0.131167	0.192988
g__Oscillospira_ASV12634	LILRA6	-0.121093	0.132109	0.194164
s__faecis_ASV15263	MGAM	-0.12107	0.132185	0.194164
s__faecis_ASV15263	LILRB3	-0.120894	0.132751	0.194834
f__Lachnospiraceae_ASV10079	CAPN13	0.120852	0.132888	0.194873
s__obeum_ASV09003	ANXA1	-0.120577	0.133779	0.19521
g__Oscillospira_ASV12634	PRSS1	-0.120619	0.13364	0.19521
g__Oscillospira_ASV13659	BNIP3	-0.120642	0.133566	0.19521
g__Oscillospira_ASV13659	DYSF	-0.120585	0.133751	0.19521
g__Roseburia_ASV15174	HK3	-0.120645	0.133557	0.19521
g__Dorea_ASV15355	HK3	-0.120707	0.133356	0.19521
f__Lachnospiraceae_ASV08984	FCGR2A	-0.120242	0.13487	0.196639
f__Lachnospiraceae_ASV09977	GLT1D1	-0.120033	0.135555	0.197475
f__Lachnospiraceae_ASV09753	AQP9	-0.119906	0.135969	0.197915
g__Clostridium_ASV12376	SLC11A1	-0.119699	0.136653	0.198748
g__Bilophila_ASV05654	BNIP3	-0.119575	0.137062	0.199179
g__Holdemania_ASV14231	ANXA1	-0.119432	0.137535	0.199703
s__parvula_ASV13157	LGR6	-0.119257	0.138118	0.200385
f__Lachnospiraceae_ASV09753	DYSF	-0.119199	0.138311	0.200499
s__obeum_ASV09003	S100A12	-0.119112	0.138602	0.200757
g__Paraprevotella_ASV02736	ANXA1	-0.119049	0.138812	0.200897
f__Lachnospiraceae_ASV14891	FCGR2A	-0.118895	0.139325	0.201475
f__Lachnospiraceae_ASV09753	MMP1	-0.118843	0.139499	0.201562
s__parainfluenzae_ASV06380	MMP1	0.118805	0.139628	0.201584
g__Dorea_ASV15355	LILRB3	-0.118771	0.139742	0.201584
g__Adlercreutzia_ASV10588	FADS1	-0.118682	0.14004	0.201849
f__Lachnospiraceae_ASV09523	GLT1D1	-0.118498	0.140661	0.20225
g__Adlercreutzia_ASV10588	HK3	-0.118559	0.140454	0.20225
g__Coprococcus_ASV15003	LGR6	0.118507	0.140632	0.20225
g__Oscillospira_ASV13741	SRPX2	-0.118345	0.141178	0.202829
f__Lachnospiraceae_ASV09170	STEAP4	-0.118232	0.141562	0.203215
g__Actinomyces_ASV08375	ACSL1	0.117961	0.142484	0.204208
g__Coprococcus_ASV10209	FCAR	-0.117991	0.142379	0.204208
g__Ruminococcus_ASV08122	MMP1	-0.117864	0.142813	0.204513
g__Adlercreutzia_ASV10588	ACSL1	-0.117671	0.143474	0.205294
f__Lachnospiraceae_ASV09523	MGAM	-0.117574	0.143806	0.205603
g__Bilophila_ASV05654	LILRA6	-0.11752	0.143991	0.205674
g__Holdemania_ASV14231	STEAP4	-0.117492	0.144088	0.205674
g__Oscillospira_ASV13741	ACSL1	-0.117288	0.144791	0.206511
g__Ruminococcus_ASV07554	LILRA6	-0.117239	0.144959	0.206584
o__Clostridiales_ASV08574	SLC11A1	-0.117158	0.145238	0.206649
g__Adlercreutzia_ASV10589	STEAP4	-0.117172	0.145192	0.206649
f__Ruminococcaceae_ASV07190	PCK1	0.117078	0.145518	0.206881
s__obeum_ASV09003	FCGR2A	-0.117009	0.145754	0.207051
g__Oscillospira_ASV12634	PCK1	0.116807	0.146456	0.207881
.f__.Mogibacteriaceae._ASV08690	PCK1	0.116682	0.146892	0.208332
g__Bilophila_ASV05654	NFE2	-0.116367	0.147994	0.209393
f__Lachnospiraceae_ASV09170	SRPX2	-0.116376	0.147961	0.209393
o__Clostridiales_ASV15397	S100A8	-0.116408	0.14785	0.209393
f__Lachnospiraceae_ASV08865	S100A12	-0.116223	0.148499	0.209939
f__Lachnospiraceae_ASV10079	PROK2	-0.116128	0.148834	0.210244
f__Lachnospiraceae_ASV10079	NFE2	-0.116063	0.149064	0.210401
g__Coprococcus_ASV15011	AQP9	-0.115959	0.149431	0.210752
g__Paraprevotella_ASV02736	FCGR2A	-0.11589	0.149676	0.210928
g__Holdemania_ASV14231	LILRB3	-0.115678	0.150426	0.211817
g__Coprococcus_ASV15011	NFE2	-0.115566	0.150822	0.212206
g__Blautia_ASV09594	FADS1	-0.115399	0.15142	0.212879
o__Clostridiales_ASV08574	S100A8	-0.115281	0.151841	0.2133
g__Blautia_ASV09594	ISX	0.11519	0.152167	0.213588
o__Clostridiales_ASV08574	LILRA6	-0.114827	0.15347	0.215247
g__Bilophila_ASV05654	GLT1D1	-0.114596	0.154306	0.216191
f__Coriobacteriaceae_ASV10586	S100A8	-0.114573	0.154387	0.216191
g__Blautia_ASV09594	PROK2	-0.114278	0.15546	0.217521
f__Lachnospiraceae_ASV09523	FCGR2A	-0.114242	0.155589	0.217529
g__Adlercreutzia_ASV10588	ANXA1	-0.114126	0.156014	0.217952
g__Fusobacterium_ASV15520	PRSS1	0.114086	0.15616	0.217983
g__Oscillospira_ASV12634	HK3	-0.113964	0.156607	0.218314
g__Coprococcus_ASV15011	LILRB3	-0.113954	0.156643	0.218314
g__Ruminococcus_ASV07554	PROK2	-0.113759	0.157358	0.218536
g__Bifidobacterium_ASV11471	LILRA6	-0.113782	0.157272	0.218536
g__Holdemania_ASV14231	FCAR	-0.113864	0.156972	0.218536
g__Parvimonas_ASV15121	STEAP4	-0.113778	0.157288	0.218536
o__Clostridiales_ASV15397	NFE2	-0.113742	0.15742	0.218536
s__producta_ASV08960	STEAP4	-0.113707	0.157548	0.218542
g__Fusobacterium_ASV15520	LILRB3	0.113587	0.157991	0.218986
g__Parvimonas_ASV15121	PRSS1	-0.113528	0.158206	0.219111
f__Lachnospiraceae_ASV08984	AQP9	-0.113485	0.158366	0.219161
g__Blautia_ASV09594	SLC26A2	0.11344	0.158533	0.219196
g__Adlercreutzia_ASV10588	NFE2	-0.113411	0.158638	0.219196
g__Bifidobacterium_ASV11471	MMP1	-0.113374	0.158775	0.219214
g__Dorea_ASV15355	GLT1D1	-0.113269	0.159165	0.21958
f__Ruminococcaceae_ASV07190	NFE2	-0.113223	0.159337	0.219646
g__Fusobacterium_ASV15522	SLC26A2	-0.113102	0.159784	0.220091
g__Ruminococcus_ASV07554	MMP1	-0.112902	0.160529	0.220946
f__Coriobacteriaceae_ASV10586	FADS1	-0.112818	0.160843	0.22097
g__Holdemania_ASV14231	SLC26A2	0.112797	0.160921	0.22097
g__Fusobacterium_ASV15522	LILRB3	0.112826	0.160813	0.22097
s__prausnitzii_ASV00156	ISX	0.112707	0.161259	0.221262
g__Anaerostipes_ASV15075	HK3	-0.112387	0.162459	0.222736
f__Lachnospiraceae_ASV14891	SLC11A1	-0.112337	0.162647	0.222821
g__Blautia_ASV09918	MGAM	-0.112218	0.163095	0.223262
s__uniformis_ASV03984	MMP1	-0.111746	0.164881	0.225359
f__Lachnospiraceae_ASV10079	S100A8	-0.111749	0.164871	0.225359
s__faecis_ASV15263	GLT1D1	-0.111693	0.165083	0.22546
g__Adlercreutzia_ASV10589	PRSS1	-0.111623	0.16535	0.225478
g__Holdemania_ASV14231	LGR6	0.111635	0.165305	0.225478
g__Oscillospira_ASV13659	SRPX2	-0.111529	0.16571	0.225794
g__Ruminococcus_ASV08122	ACSL1	-0.111401	0.166199	0.226113
g__Clostridium_ASV12376	MMP1	-0.111428	0.166094	0.226113
f__Lachnospiraceae_ASV08984	FADS1	-0.111074	0.167454	0.227645
f__Lachnospiraceae_ASV09523	HK3	-0.110703	0.168886	0.229415
f__Lachnospiraceae_ASV09753	SLC26A2	0.110647	0.169103	0.229534
s__clostridioforme_ASV09123	FCAR	-0.110525	0.169577	0.230001
g__Coprococcus_ASV15011	S100A12	-0.11038	0.170141	0.23059
f__Lachnospiraceae_ASV08865	FADS1	-0.110266	0.170585	0.230739
s__producta_ASV08960	AQP9	-0.110131	0.171113	0.230739
s__obeum_ASV09003	SLC26A2	0.110118	0.171162	0.230739
f__Lachnospiraceae_ASV09977	STEAP4	-0.110216	0.170778	0.230739
g__Coprococcus_ASV10209	MMP1	-0.110084	0.171294	0.230739
s__parvula_ASV13157	HK3	0.110214	0.170786	0.230739
g__Oscillospira_ASV13741	GLT1D1	-0.11027	0.170567	0.230739
g__Fusobacterium_ASV15522	CAPN13	-0.110108	0.171202	0.230739
.f__.Mogibacteriaceae._ASV08690	MCEMP1	-0.109926	0.171916	0.231224
f__Ruminococcaceae_ASV13704	LILRB3	-0.10994	0.171861	0.231224
f__Lachnospiraceae_ASV10079	MGAM	-0.109886	0.172073	0.231259
g__Parvimonas_ASV15121	DYSF	-0.109811	0.172368	0.231481
s__clostridioforme_ASV09123	GLT1D1	-0.109763	0.172554	0.231555
g__Bilophila_ASV05654	DYSF	-0.109602	0.17319	0.231951
g__Coprococcus_ASV10209	SLC11A1	-0.109571	0.173314	0.231951
f__Coriobacteriaceae_ASV10586	AQP9	-0.109555	0.173373	0.231951
g__Fusobacterium_ASV15522	ACSL1	0.109629	0.173082	0.231951
g__Roseburia_ASV15174	ANXA1	-0.109371	0.174105	0.232753
f__Lachnospiraceae_ASV09523	SLC11A1	-0.109194	0.174805	0.233167
f__Lachnospiraceae_ASV10079	ACSL1	-0.109224	0.174685	0.233167
f__Lachnospiraceae_ASV14891	PROK2	-0.109193	0.17481	0.233167
g__Holdemania_ASV14231	NFE2	-0.109102	0.175172	0.233298
g__Fusobacterium_ASV15522	STEAP4	0.109105	0.175159	0.233298
f__Lachnospiraceae_ASV14891	AQP9	-0.109015	0.175518	0.233584
g__Coprococcus_ASV15011	MGAM	-0.108943	0.175806	0.233791
g__Oscillospira_ASV13659	ISX	0.108875	0.176075	0.233973
g__Dorea_ASV15355	FADS1	-0.108821	0.17629	0.234083
g__Oscillospira_ASV13659	AQP9	-0.108595	0.177198	0.235113
g__Oscillospira_ASV12634	LILRB3	-0.108542	0.177408	0.235215
g__Anaerostipes_ASV15075	MMP1	-0.108434	0.177844	0.235617
s__uniformis_ASV03984	CAPN13	0.108132	0.17906	0.23705
f__Ruminococcaceae_ASV13704	LGR6	0.108049	0.179398	0.23732
s__clostridioforme_ASV09123	SLC26A2	0.107966	0.179732	0.237407
g__Oscillospira_ASV13659	LILRB3	-0.107967	0.179728	0.237407
g__Bilophila_ASV05654	FADS1	-0.107892	0.180034	0.237481
g__Coprococcus_ASV10209	PROK2	-0.107862	0.180157	0.237481
f__Coriobacteriaceae_ASV10586	MCEMP1	-0.107788	0.180458	0.237481
g__Oscillospira_ASV13741	NFE2	-0.107806	0.180383	0.237481
g__Fusobacterium_ASV15520	PCK1	-0.107835	0.180266	0.237481
f__Lachnospiraceae_ASV09523	FCAR	-0.107681	0.180893	0.237875
g__Actinomyces_ASV08375	DYSF	0.107551	0.181423	0.238395
f__Lachnospiraceae_ASV09523	C6orf223	-0.107452	0.181827	0.238749
g__Blautia_ASV09078	MMP1	-0.107209	0.182823	0.239736
f__Lachnospiraceae_ASV14891	DYSF	-0.107202	0.18285	0.239736
f__Lachnospiraceae_ASV09170	SLC26A2	0.107022	0.18359	0.240529
s__parainfluenzae_ASV06380	SLC11A1	0.106953	0.183875	0.240583
f__Lachnospiraceae_ASV10079	AQP9	-0.106946	0.183904	0.240583
f__Lachnospiraceae_ASV08984	SLC11A1	-0.106872	0.184209	0.240805
f__Coriobacteriaceae_ASV10586	SRPX2	-0.106824	0.184409	0.240888
o__Clostridiales_ASV08574	ACSL1	-0.10666	0.185086	0.241594
g__Blautia_ASV09594	NFE2	-0.106606	0.185309	0.241708
s__obeum_ASV09003	ACSL1	-0.1064	0.186166	0.242646
o__Clostridiales_ASV08574	S100A12	-0.106332	0.186451	0.242839
f__Lachnospiraceae_ASV09170	PCK1	0.106183	0.187071	0.243467
o__Clostridiales_ASV15397	ACSL1	-0.106072	0.187537	0.243894
g__Adlercreutzia_ASV10588	LGR6	0.106012	0.187787	0.244041
f__Lachnospiraceae_ASV08865	SLC11A1	-0.105742	0.188919	0.245332
.f__.Mogibacteriaceae._ASV08690	CAPN13	0.105697	0.189107	0.245396
f__Lachnospiraceae_ASV09170	PRSS1	-0.10558	0.189603	0.245858
f__Lachnospiraceae_ASV08865	S100A8	-0.105422	0.190267	0.24654
g__Ruminococcus_ASV07554	GLT1D1	-0.105297	0.190797	0.246684
f__Lachnospiraceae_ASV09113	PRSS1	-0.10534	0.190615	0.246684
g__Roseburia_ASV15174	GLT1D1	-0.105302	0.190775	0.246684
g__Ruminococcus_ASV07554	FADS1	-0.105179	0.1913	0.247155
o__Clostridiales_ASV15397	SLC26A2	0.105068	0.191768	0.247578
s__clostridioforme_ASV09123	PRSS1	-0.104717	0.193268	0.249203
f__Lachnospiraceae_ASV09753	SLC11A1	-0.104707	0.193308	0.249203
s__obeum_ASV09003	SRPX2	-0.104442	0.194445	0.249524
f__Lachnospiraceae_ASV09113	MMP1	-0.104405	0.194605	0.249524
f__Lachnospiraceae_ASV09523	SPON2	-0.10451	0.194152	0.249524
f__Lachnospiraceae_ASV09977	DYSF	-0.104616	0.1937	0.249524
f__Coriobacteriaceae_ASV10586	DYSF	-0.10457	0.193895	0.249524
g__Oscillospira_ASV13659	S100A8	-0.104475	0.194302	0.249524
g__Oscillospira_ASV13659	STEAP4	-0.104546	0.193998	0.249524
o__Clostridiales_ASV15397	FCGR2A	-0.104386	0.194685	0.249524
